# Supplementary material for: Competition between hydrogen bonding and dispersion interactions in the crystal structures of the primary amines
Source: Royal Society of Chemistry journal article supplement (doi:10.1039/c3ce42639d), 2014-01-01
Supplement: c3ce42639d2.fcf [file c3ce42639d2.fcf]

data_butylamine 
#  Butylamine in Pbcn at 150K                          
_audit_creation_date        "10-11-04"
_audit_creation_method      CRYSTALS 

_cell_length_a                    26.7852(8)
_cell_angle_alpha                 90
_cell_length_b                    6.8166(2)
_cell_angle_beta                  90
_cell_length_c                    5.6703(2)
_cell_angle_gamma                 90

# NOTE FO on scale of Fc,      2.59573
# Status flags: 
#    o - used in refinement 
#    < - excluded by I/sigmaI cutoff 
#    x - excluded for another reason  

loop_
_refln_index_h
_refln_index_k
_refln_index_l
_refln_F_squared_meas
_refln_F_squared_calc
_refln_F_squared_sigma
_refln_observed_status
   2   0   0     1052.98     1099.43       19.07 o
   4   0   0      519.13      543.99        7.86 o
   6   0   0      837.51      839.29       15.30 o
   8   0   0      737.59      719.58       19.94 o
  10   0   0     1836.29     1720.15       33.42 o
  12   0   0      260.21      226.25        4.23 o
  14   0   0       39.35       32.86        1.03 o
  16   0   0      148.27      141.70        2.38 o
  18   0   0       18.66       14.77        0.74 o
  20   0   0       84.29       85.69        2.30 o
  22   0   0     2130.86     2343.02       40.00 o
  24   0   0      108.04      107.71        2.89 o
  26   0   0       70.01       72.77        2.76 o
  28   0   0       31.06       27.96        1.82 o
  30   0   0       40.36       36.70        2.16 o
  32   0   0       81.19       74.60        3.30 o
  34   0   0       77.96       65.03        3.23 o
  36   0   0       20.42       16.97        1.82 o
  38   0   0        9.10        6.84        1.41 o
   1   1   0       18.35       17.80        0.30 o
   3   1   0       21.81       22.57        0.40 o
   5   1   0      229.56      226.28        3.71 o
   7   1   0        8.89        7.37        0.44 o
   9   1   0      103.26      106.52        1.63 o
  11   1   0     2652.28     2490.75       31.01 o
  13   1   0      108.64      105.75        1.44 o
  15   1   0       14.21        9.84        0.45 o
  17   1   0       29.85       30.74        0.76 o
  19   1   0        2.40        1.01        0.47 o
  21   1   0       17.20       15.52        0.86 o
  23   1   0        8.89        8.17        1.03 o
  25   1   0        6.63        6.92        2.20 o
  27   1   0        8.78        6.80        0.75 o
  29   1   0       -0.22        0.03        0.10 o
  31   1   0        2.94        2.27        1.02 o
  33   1   0       31.97       27.94        1.38 o
  35   1   0        3.67        3.40        1.61 o
  37   1   0        0.61        0.41        0.26 o
   2   2   0      202.39      174.94        2.86 o
   4   2   0      112.34      122.24        1.97 o
   6   2   0      107.85       97.36        1.96 o
   8   2   0      394.73      414.92        4.83 o
  10   2   0      810.46      741.53        8.87 o
  12   2   0      163.46      142.21        2.07 o
  14   2   0        5.70        4.91        1.01 o
  16   2   0       17.87       18.94        0.62 o
  18   2   0       13.60       12.68        0.62 o
  20   2   0       24.71       24.25        0.80 o
  22   2   0      868.86     1012.46       11.87 o
  24   2   0       34.12       36.17        1.13 o
  26   2   0       44.78       51.66        1.32 o
  28   2   0       10.68       10.08        1.07 o
  30   2   0       27.36       30.47        1.57 o
  32   2   0       49.42       51.36        2.04 o
  34   2   0       42.41       41.34        1.97 o
  36   2   0        5.90        7.40        3.91 o
   1   3   0        7.87        6.99        0.36 o
   3   3   0       76.59       69.61        1.27 o
   5   3   0      233.13      226.56        3.34 o
   7   3   0        0.92        0.68        0.06 o
   9   3   0      167.81      155.18        2.33 o
  11   3   0     3098.50     3206.32       40.99 o
  13   3   0      191.42      189.29        3.51 o
  15   3   0       18.26       17.26        0.91 o
  17   3   0       66.43       72.48        1.44 o
  19   3   0        8.94        7.71        0.62 o
  21   3   0       74.92       72.07        1.66 o
  23   3   0       56.09       48.76        1.45 o
  25   3   0       27.69       31.92        1.22 o
  27   3   0       23.48       23.49        1.39 o
  29   3   0       -0.71        0.16        0.18 o
  31   3   0        7.85        8.11        1.08 o
  33   3   0      118.59      115.39        3.47 o
  35   3   0       15.13       13.79        1.45 o
   0   4   0     2158.52     1869.47       40.38 o
   2   4   0       -0.27        0.20        0.09 o
   4   4   0       79.07       62.91        1.40 o
   6   4   0       12.76       14.99        0.64 o
   8   4   0      157.87      165.43        2.91 o
  10   4   0      101.04       98.66        2.11 o
  12   4   0       12.82       14.10        0.78 o
  14   4   0       18.30       19.21        0.95 o
  16   4   0       11.68        9.42        0.81 o
  18   4   0        3.39        1.94        1.15 o
  20   4   0       -0.76        0.06        0.11 o
  22   4   0      133.77      163.34        3.01 o
  24   4   0       -0.63        0.10        0.13 o
  26   4   0       27.67       29.14        1.29 o
  28   4   0        1.08        0.27        0.49 o
  30   4   0       18.60       15.46        1.45 o
  32   4   0       15.40       13.95        1.39 o
  34   4   0        9.50        7.46        1.26 o
   1   5   0        2.93        2.51        0.83 o
   3   5   0       16.27       12.40        0.91 o
   5   5   0       52.62       47.84        1.58 o
   7   5   0       16.17       18.55        0.96 o
   9   5   0       50.43       51.41        1.67 o
  11   5   0     1567.78     1667.53       24.31 o
  13   5   0       81.64       75.93        1.98 o
  15   5   0       53.30       49.28        1.56 o
  17   5   0       18.06       19.01        0.99 o
  19   5   0        8.20       10.74        0.82 o
  21   5   0       58.21       60.42        1.83 o
  23   5   0       48.87       44.87        1.72 o
  25   5   0       17.50       19.08        1.21 o
  27   5   0       12.33       11.31        1.36 o
  29   5   0        0.24        0.01        0.12 o
  31   5   0        5.03        5.25        2.10 o
   0   6   0        8.09        1.66        0.94 o
   2   6   0       16.27       17.50        0.91 o
   4   6   0        6.40        3.86        2.55 o
   6   6   0       51.07       52.52        1.60 o
   8   6   0       83.45       78.24        2.24 o
  10   6   0        3.17        3.29        1.20 o
  12   6   0        0.64        0.15        0.13 o
  14   6   0       49.76       51.95        1.82 o
  16   6   0       38.94       35.45        1.41 o
  18   6   0        3.48        2.91        1.36 o
  20   6   0        2.61        2.27        1.02 o
  22   6   0        1.25        0.74        0.55 o
  24   6   0        8.25        7.50        1.15 o
  26   6   0        4.24        5.39        2.53 o
  28   6   0        6.23        4.70        4.27 o
  30   6   0        7.88        5.27        1.32 o
   1   7   0        0.88        1.18        0.13 o
   3   7   0        4.31        4.23        1.57 o
   5   7   0        0.17        0.20        0.11 o
   7   7   0       18.33       19.09        1.03 o
   9   7   0        7.58        8.47        0.77 o
  11   7   0      505.54      508.34       10.13 o
  13   7   0       12.73       11.74        1.03 o
  15   7   0       43.32       42.52        1.73 o
  17   7   0        0.91        0.39        0.20 o
  19   7   0       15.13       11.76        1.27 o
  21   7   0       20.79       22.68        1.44 o
  23   7   0       20.21       16.78        1.51 o
  25   7   0        1.41        1.10        0.74 o
   0   8   0      129.30      128.39        4.04 o
   2   8   0       15.56       13.58        1.28 o
   4   8   0        4.65        5.34        2.60 o
   6   8   0       19.94       17.88        1.68 o
   8   8   0       21.02       19.60        1.75 o
  10   8   0        0.40        1.16        0.19 o
  12   8   0        1.08        1.38        0.69 o
  14   8   0       24.53       27.50        2.16 o
  16   8   0       21.36       17.79        1.27 o
  18   8   0        5.29        5.74        2.39 o
  20   8   0        0.98        1.97        0.23 o
   7   9   0        2.22        3.38        1.16 o
   9   9   0       -0.67        0.35        0.21 o
  11   9   0       47.43       47.72        2.56 o
  13   9   0       -0.27        0.04        0.17 o
   1   1   1     4962.58     4762.31       52.41 o
   2   1   1     2034.58     2034.82       21.51 o
   3   1   1     6597.22     6571.41       69.80 o
   4   1   1     4400.30     4376.22       42.88 o
   5   1   1      176.64      183.29        1.77 o
   6   1   1        7.15        8.13        0.43 o
   7   1   1      550.67      546.55        4.90 o
   8   1   1      589.24      548.18        5.25 o
   9   1   1      385.46      376.53        3.17 o
  10   1   1       73.10       60.36        0.76 o
  11   1   1        4.79        6.64        0.56 o
  12   1   1      339.35      337.15        2.88 o
  13   1   1      970.89      950.50        7.19 o
  14   1   1      298.19      290.95        2.21 o
  15   1   1      471.24      473.30        3.63 o
  16   1   1      118.49      111.55        1.12 o
  17   1   1       11.20       11.85        0.35 o
  18   1   1      356.95      378.82        3.11 o
  19   1   1      633.24      670.86        5.52 o
  20   1   1       49.63       52.32        0.77 o
  21   1   1      221.92      242.17        2.20 o
  22   1   1      131.63      127.11        1.55 o
  23   1   1      238.77      263.09        2.64 o
  24   1   1       91.06       92.42        1.43 o
  25   1   1      156.03      177.44        2.29 o
  26   1   1       82.96       87.30        1.53 o
  27   1   1        8.64        7.71        0.55 o
  28   1   1        0.66        0.13        0.09 o
  29   1   1        2.96        1.91        0.84 o
  30   1   1       -0.71        0.03        0.12 o
  31   1   1        6.43        4.95        1.92 o
  32   1   1       20.50       18.01        0.95 o
  33   1   1        0.30        0.62        0.10 o
  34   1   1       23.38       21.19        1.04 o
  35   1   1       77.64       73.30        1.76 o
  36   1   1       10.58        7.93        0.82 o
  37   1   1       32.45       27.86        1.25 o
   0   2   1      122.56      119.18        2.13 o
   1   2   1       37.64       35.98        0.71 o
   2   2   1      863.98      868.59       10.42 o
   3   2   1      196.78      189.04        2.33 o
   4   2   1      476.67      470.47        5.85 o
   5   2   1      158.44      146.33        1.91 o
   6   2   1        9.72       14.92        0.26 o
   7   2   1      480.92      448.63        4.36 o
   8   2   1     1065.92     1040.04        8.15 o
   9   2   1      160.75      156.44        1.46 o
  10   2   1      545.15      535.32        4.28 o
  11   2   1       58.49       56.17        0.64 o
  12   2   1      414.41      384.04        3.21 o
  13   2   1      139.07      136.37        1.29 o
  14   2   1      314.08      314.63        2.76 o
  15   2   1      120.08      123.55        1.39 o
  16   2   1       14.12       10.29        0.49 o
  17   2   1        8.93       11.07        0.39 o
  18   2   1       31.44       30.28        0.65 o
  19   2   1        9.55        9.00        0.42 o
  20   2   1        9.85       11.58        0.45 o
  21   2   1       11.51       11.95        0.53 o
  22   2   1        9.66       10.77        0.49 o
  23   2   1        9.39        7.71        0.50 o
  24   2   1      100.39      100.03        1.60 o
  25   2   1        6.10        5.83        1.34 o
  26   2   1       32.26       30.55        0.88 o
  27   2   1       19.27       18.71        0.79 o
  28   2   1       -0.37        0.13        0.08 o
  29   2   1       11.49       11.28        0.73 o
  30   2   1       26.19       25.61        1.01 o
  31   2   1        2.43        1.99        0.70 o
  32   2   1       17.16       14.40        0.90 o
  33   2   1        8.67        5.62        0.89 o
  34   2   1       13.34       12.07        1.05 o
  35   2   1        3.03        2.79        1.37 o
  36   2   1        7.03        7.51        1.18 o
  37   2   1        0.88        1.01        0.20 o
   1   3   1      410.97      360.86        4.05 o
   2   3   1      195.46      167.48        1.92 o
   3   3   1      711.63      627.04        6.44 o
   4   3   1      575.09      526.73        5.25 o
   5   3   1       21.41       23.71        0.42 o
   6   3   1        3.64        4.90        0.45 o
   7   3   1       16.17       18.67        0.42 o
   8   3   1       55.34       55.50        0.67 o
   9   3   1        1.92        1.99        0.23 o
  10   3   1       31.58       37.25        0.55 o
  11   3   1       17.71       18.25        0.42 o
  12   3   1      144.96      144.29        1.53 o
  13   3   1       97.97       94.10        1.24 o
  14   3   1       75.42       75.68        1.05 o
  15   3   1       68.57       68.91        1.00 o
  16   3   1       13.42       12.77        0.49 o
  17   3   1        4.58        3.79        0.97 o
  18   3   1       82.84       98.42        1.19 o
  19   3   1      132.26      158.61        1.67 o
  20   3   1        6.65        9.81        1.19 o
  21   3   1       38.18       45.63        0.84 o
  22   3   1       43.91       48.20        1.04 o
  23   3   1       67.85       78.61        1.45 o
  24   3   1       26.13       29.73        0.93 o
  25   3   1       41.34       50.95        1.15 o
  26   3   1       31.38       33.32        1.00 o
  27   3   1        1.28        1.49        0.42 o
  28   3   1        0.93        0.71        0.15 o
  29   3   1        0.47        0.56        0.16 o
  30   3   1        0.52        0.42        0.17 o
  31   3   1        9.50        8.20        0.81 o
  32   3   1        2.90        3.47        1.15 o
  33   3   1       -0.02        0.36        0.16 o
  34   3   1       13.86       12.52        1.00 o
  35   3   1       16.12       17.20        1.07 o
  36   3   1        4.06        4.61        1.88 o
   0   4   1       47.27       39.89        1.39 o
   1   4   1       26.46       33.61        0.87 o
   2   4   1      379.94      373.50        4.68 o
   3   4   1       68.44       69.00        0.99 o
   4   4   1      188.82      185.32        2.29 o
   5   4   1      101.17       92.19        1.53 o
   6   4   1        2.33        2.69        0.43 o
   7   4   1      175.88      177.49        2.44 o
   8   4   1      490.62      524.47        5.55 o
   9   4   1       72.96       77.49        1.03 o
  10   4   1      271.86      281.78        3.24 o
  11   4   1       42.53       47.21        0.94 o
  12   4   1      240.43      245.71        3.03 o
  13   4   1       93.00      100.22        1.34 o
  14   4   1      211.41      216.58        2.53 o
  15   4   1       77.84       82.54        1.22 o
  16   4   1        5.62        5.12        1.26 o
  17   4   1        6.83        7.52        0.71 o
  18   4   1       13.36       15.56        0.56 o
  19   4   1        3.74        5.03        0.88 o
  20   4   1        1.67        2.36        0.37 o
  21   4   1       12.68       12.74        0.59 o
  22   4   1        6.66        6.94        1.44 o
  23   4   1       21.34       19.77        0.79 o
  24   4   1      128.30      131.84        2.06 o
  25   4   1        8.41        8.14        0.72 o
  26   4   1       42.46       39.08        1.22 o
  27   4   1       32.32       29.12        1.43 o
  28   4   1        1.41        0.49        0.60 o
  29   4   1       17.05       16.37        1.22 o
  30   4   1       37.11       38.07        1.38 o
  31   4   1        3.05        3.07        1.39 o
  32   4   1       23.11       21.04        1.05 o
  33   4   1       11.93       10.72        0.87 o
  34   4   1       21.54       20.25        1.17 o
   1   5   1       27.36       19.70        0.94 o
   2   5   1       10.04        6.65        0.66 o
   3   5   1       70.49       52.21        1.16 o
   4   5   1       87.42       74.25        1.37 o
   5   5   1        4.23        3.90        1.05 o
   6   5   1        9.58       11.39        0.51 o
   7   5   1        8.46        6.70        0.74 o
   8   5   1        2.41        2.10        0.62 o
   9   5   1       27.88       27.81        0.91 o
  10   5   1       23.21       25.10        0.89 o
  11   5   1       48.12       48.06        1.24 o
  12   5   1       38.28       35.28        0.94 o
  13   5   1       12.34       11.80        0.62 o
  14   5   1       13.60       13.60        0.64 o
  15   5   1        0.31        0.10        0.07 o
  16   5   1        2.45        2.05        0.58 o
  17   5   1        4.36        4.41        1.21 o
  18   5   1       13.34       16.12        0.67 o
  19   5   1        8.75       13.24        0.66 o
  20   5   1        0.24        0.15        0.10 o
  21   5   1        0.16        0.40        0.09 o
  22   5   1        6.45        6.49        1.55 o
  23   5   1        6.59        8.89        1.83 o
  24   5   1        2.13        2.36        0.67 o
  25   5   1        3.56        5.77        1.29 o
  26   5   1        7.28        7.65        1.03 o
  27   5   1        0.20        0.01        0.17 o
  28   5   1        1.87        1.93        0.64 o
  29   5   1        5.12        4.58        2.29 o
  30   5   1        0.77        0.70        0.18 o
  31   5   1        8.00        6.53        0.85 o
  32   5   1        0.02        0.37        0.14 o
   0   6   1       -0.74        0.00        0.19 o
   1   6   1       25.60       29.23        1.26 o
   2   6   1       59.93       56.18        1.98 o
   3   6   1       22.91       24.61        1.29 o
   4   6   1       28.41       29.37        0.99 o
   5   6   1       31.26       32.39        1.06 o
   6   6   1        0.13        0.34        0.11 o
   7   6   1      104.50       98.77        2.24 o
   8   6   1      255.83      257.60        4.55 o
   9   6   1       47.25       44.42        1.43 o
  10   6   1      139.05      145.20        2.85 o
  11   6   1       17.54       17.38        0.84 o
  12   6   1      140.25      147.83        2.54 o
  13   6   1       52.45       51.77        1.39 o
  14   6   1      143.90      148.25        2.65 o
  15   6   1       46.10       46.73        1.12 o
  16   6   1        1.52        1.10        0.41 o
  17   6   1        2.88        3.51        1.01 o
  18   6   1       -0.19        0.27        0.11 o
  19   6   1        0.25        1.21        0.12 o
  20   6   1        0.98        0.95        0.14 o
  21   6   1        0.94        1.19        0.16 o
  22   6   1        0.15        0.03        0.12 o
  23   6   1       22.39       18.78        1.09 o
  24   6   1       47.87       47.64        1.50 o
  25   6   1        5.44        5.30        2.48 o
  26   6   1       14.12       15.74        1.01 o
  27   6   1       14.44       15.76        1.03 o
  28   6   1        0.13        0.11        0.19 o
  29   6   1       11.16       10.16        0.87 o
   1   7   1       19.07       18.43        1.26 o
   2   7   1        7.55        9.43        0.91 o
   3   7   1        8.22       10.65        0.88 o
   4   7   1        1.72        0.62        0.68 o
   5   7   1        2.39        2.58        1.01 o
   6   7   1       18.83       17.83        1.26 o
   7   7   1        8.76        8.57        0.71 o
   8   7   1        1.12        0.78        0.32 o
   9   7   1       34.18       31.96        1.20 o
  10   7   1        7.91        7.41        1.01 o
  11   7   1       35.80       30.01        1.34 o
  12   7   1        4.04        2.58        1.62 o
  13   7   1       46.54       47.07        1.53 o
  14   7   1        0.61        0.53        0.16 o
  15   7   1        4.42        4.27        1.90 o
  16   7   1       12.40       13.13        0.97 o
  17   7   1        4.56        5.31        2.05 o
  18   7   1        0.29        0.03        0.19 o
  19   7   1        3.41        4.03        1.53 o
  20   7   1        4.13        3.04        1.93 o
  21   7   1        9.39       10.44        1.33 o
  22   7   1        0.61        0.00        0.12 o
  23   7   1        2.34        1.48        1.03 o
  24   7   1        0.57        1.10        0.15 o
  25   7   1        2.29        1.68        0.88 o
  26   7   1       -0.13        0.56        0.12 o
   0   8   1       10.98       10.61        1.48 o
   1   8   1       18.16       16.71        1.29 o
   2   8   1        1.01        0.08        0.46 o
   3   8   1        4.55        4.04        2.33 o
   4   8   1        0.64        0.38        0.16 o
   5   8   1        3.10        2.82        1.49 o
   6   8   1        0.77        1.10        0.19 o
   7   8   1       21.02       22.57        1.38 o
   8   8   1       50.30       52.49        1.98 o
   9   8   1        7.45        6.05        0.98 o
  10   8   1       22.14       22.14        1.05 o
  11   8   1        3.89        3.55        1.50 o
  12   8   1       31.06       31.09        1.25 o
  13   8   1        8.69        7.51        0.84 o
  14   8   1       36.54       35.90        1.39 o
  15   8   1        9.12       11.63        1.19 o
  16   8   1        2.04        0.34        0.85 o
  17   8   1        0.63        0.07        0.18 o
  18   8   1        3.19        2.01        1.41 o
  19   8   1        1.10        0.00        0.48 o
  20   8   1        6.06        6.16        3.28 o
  21   8   1        0.90        0.49        0.23 o
   1   9   1       21.19       20.99        1.36 o
   2   9   1       10.48        9.88        1.05 o
   3   9   1       18.63       20.23        1.29 o
   4   9   1        0.07        0.84        0.21 o
   5   9   1        0.54        1.06        0.20 o
   6   9   1        8.22        8.01        1.03 o
   7   9   1        0.34        0.75        0.18 o
   8   9   1       -0.30        0.91        0.17 o
   9   9   1        5.96        5.93        3.19 o
  10   9   1        1.15        0.33        0.53 o
  11   9   1        6.47        5.94        2.90 o
  12   9   1        0.94        0.43        0.21 o
  13   9   1       19.47       19.45        1.40 o
   0   0   2     1840.63     1653.76       49.12 o
   1   0   2      180.67      155.73        3.81 o
   2   0   2     3738.56     3685.01       55.83 o
   3   0   2     4039.41     3627.37       60.31 o
   4   0   2       37.93       28.19        0.95 o
   5   0   2      695.11      590.72        9.33 o
   6   0   2      276.03      273.52        3.51 o
   7   0   2     1036.29     1022.79       12.32 o
   8   0   2      212.91      233.79        2.53 o
   9   0   2      253.60      244.49        2.77 o
  10   0   2      706.31      637.41        6.77 o
  11   0   2       12.43        6.91        0.37 o
  12   0   2      562.95      592.73        5.46 o
  13   0   2       66.67       68.78        0.93 o
  14   0   2       25.38       21.91        0.60 o
  15   0   2      472.06      481.02        5.35 o
  16   0   2       81.54       79.34        1.27 o
  17   0   2      166.45      174.57        2.18 o
  18   0   2       67.12       68.45        1.17 o
  19   0   2     1122.91     1180.85       12.30 o
  20   0   2      521.52      549.89        6.00 o
  21   0   2       28.60       24.55        0.84 o
  22   0   2      209.55      226.32        3.27 o
  23   0   2        1.17        0.49        0.27 o
  24   0   2       53.72       64.79        1.43 o
  25   0   2       96.69      107.16        2.11 o
  26   0   2        6.85        4.48        0.85 o
  27   0   2        3.86        4.75        1.28 o
  28   0   2        8.58       11.85        0.75 o
  29   0   2        1.35        2.49        0.42 o
  30   0   2       17.79       17.56        1.06 o
  31   0   2       -0.34        0.02        0.14 o
  32   0   2        0.34        0.86        0.13 o
  33   0   2        1.75        0.75        1.18 o
  34   0   2       26.95       27.72        1.79 o
  35   0   2        6.67        6.88        5.34 o
  36   0   2        0.94        0.93        0.29 o
  37   0   2       32.21       30.91        2.22 o
   1   1   2       99.82       94.98        1.56 o
   2   1   2       13.42       11.33        0.42 o
   3   1   2       26.27       23.73        0.43 o
   4   1   2      115.92      109.40        1.12 o
   5   1   2       36.35       39.21        0.43 o
   6   1   2       95.67      100.76        0.88 o
   7   1   2        8.36        6.54        0.24 o
   8   1   2      543.49      511.56        4.44 o
   9   1   2      247.58      234.07        1.97 o
  10   1   2        4.55        7.05        0.56 o
  11   1   2      155.85      158.25        1.24 o
  12   1   2        0.64        0.51        0.04 o
  13   1   2       70.96       74.92        0.84 o
  14   1   2      117.85      130.01        1.13 o
  15   1   2        0.96        0.58        0.06 o
  16   1   2       18.47       19.11        0.44 o
  17   1   2        0.45        0.77        0.05 o
  18   1   2        4.67        4.72        0.86 o
  19   1   2        6.54        6.77        1.15 o
  20   1   2        0.44        0.36        0.05 o
  21   1   2        1.93        1.49        0.35 o
  22   1   2        0.48        0.53        0.07 o
  23   1   2        6.82        6.39        0.67 o
  24   1   2        0.37        0.45        0.07 o
  25   1   2        0.40        0.23        0.08 o
  26   1   2        9.69        8.94        0.61 o
  27   1   2        6.18        5.43        1.83 o
  28   1   2        5.20        4.59        1.71 o
  29   1   2        0.22        0.30        0.11 o
  30   1   2       26.16       25.45        1.00 o
  31   1   2        6.59        5.96        2.04 o
  32   1   2        1.55        0.48        0.47 o
  33   1   2        6.17        6.10        1.72 o
  34   1   2        0.32        0.01        0.14 o
  35   1   2       -0.13        0.39        0.11 o
  36   1   2        0.72        1.54        0.21 o
   0   2   2      287.22      262.18        3.99 o
   1   2   2       76.96       66.38        0.88 o
   2   2   2      974.06      942.29        8.58 o
   3   2   2      727.59      628.62        6.46 o
   4   2   2        5.30        2.16        0.62 o
   5   2   2      139.96      119.92        1.24 o
   6   2   2       95.67       98.25        0.88 o
   7   2   2      381.22      378.05        2.90 o
   8   2   2       67.06       65.73        0.70 o
   9   2   2      112.79      119.99        1.06 o
  10   2   2      264.28      266.21        2.20 o
  11   2   2        4.87        4.96        0.67 o
  12   2   2      263.40      269.21        2.08 o
  13   2   2       52.80       51.62        0.67 o
  14   2   2        2.33        2.65        0.33 o
  15   2   2      242.14      247.48        2.35 o
  16   2   2       35.30       33.83        0.68 o
  17   2   2       61.64       63.92        0.94 o
  18   2   2       37.91       43.89        0.76 o
  19   2   2      455.45      498.70        4.93 o
  20   2   2      238.18      274.59        2.82 o
  21   2   2       11.89       11.38        0.59 o
  22   2   2       76.91       85.49        1.37 o
  23   2   2        0.16        0.19        0.05 o
  24   2   2       22.20       26.04        0.70 o
  25   2   2       34.52       37.86        0.95 o
  26   2   2        2.65        1.73        0.67 o
  27   2   2        0.61        0.43        0.08 o
  28   2   2       10.63       11.80        0.65 o
  29   2   2        2.25        2.16        0.60 o
  30   2   2       11.61       10.41        0.75 o
  31   2   2        0.40        0.11        0.12 o
  32   2   2        1.20        0.81        0.39 o
  33   2   2        0.10        0.11        0.07 o
  34   2   2       21.83       19.40        1.03 o
  35   2   2        6.84        6.24        1.08 o
  36   2   2        1.66        1.16        0.69 o
   1   3   2      118.28      118.58        1.81 o
   2   3   2       27.12       26.56        0.64 o
   3   3   2       25.76       22.15        0.63 o
   4   3   2      173.42      172.93        1.87 o
   5   3   2      119.75      120.56        1.21 o
   6   3   2      162.81      172.34        1.59 o
   7   3   2        2.35        2.30        0.31 o
   8   3   2      736.04      713.72        7.09 o
   9   3   2      372.39      383.07        3.31 o
  10   3   2       10.91       12.46        0.33 o
  11   3   2      272.98      270.74        2.49 o
  12   3   2        1.95        0.92        0.30 o
  13   3   2      115.96      114.70        1.52 o
  14   3   2      199.48      205.98        2.37 o
  15   3   2        7.81        8.35        0.50 o
  16   3   2       35.66       39.25        0.75 o
  17   3   2        3.32        2.87        0.70 o
  18   3   2        6.24        7.82        1.53 o
  19   3   2       19.61       20.58        0.66 o
  20   3   2        1.07        0.79        0.24 o
  21   3   2        4.05        3.22        1.00 o
  22   3   2        2.48        2.69        0.61 o
  23   3   2       30.71       28.02        0.86 o
  24   3   2        3.60        3.77        0.98 o
  25   3   2        1.06        0.31        0.26 o
  26   3   2       44.46       44.28        1.08 o
  27   3   2       26.75       26.39        0.95 o
  28   3   2       18.45       19.23        0.87 o
  29   3   2        1.97        1.67        0.71 o
  30   3   2      117.24      110.09        2.52 o
  31   3   2       29.34       26.08        1.20 o
  32   3   2        2.41        1.86        0.90 o
  33   3   2       27.78       25.23        1.30 o
  34   3   2        0.45        0.14        0.15 o
  35   3   2        0.90        1.13        0.20 o
   0   4   2        3.03        1.32        1.70 o
   1   4   2        6.49        8.01        1.77 o
   2   4   2       91.45       79.25        1.96 o
   3   4   2       41.44       28.25        1.23 o
   4   4   2       16.13       13.67        0.88 o
   5   4   2        0.52        0.14        0.11 o
   6   4   2        3.23        0.56        0.70 o
   7   4   2      112.10      103.29        1.71 o
   8   4   2        4.36        3.04        0.92 o
   9   4   2       38.68       40.34        0.82 o
  10   4   2       65.59       71.01        1.11 o
  11   4   2        3.50        4.35        0.86 o
  12   4   2       62.35       63.15        1.25 o
  13   4   2       27.10       29.84        0.64 o
  14   4   2        2.20        1.07        0.45 o
  15   4   2       60.83       62.91        1.13 o
  16   4   2        0.11        0.01        0.05 o
  17   4   2        1.72        1.88        0.37 o
  18   4   2       19.74       22.39        0.71 o
  19   4   2       48.47       59.39        1.07 o
  20   4   2       44.80       54.51        1.04 o
  21   4   2        2.25        2.00        0.59 o
  22   4   2        2.53        4.00        0.69 o
  23   4   2       -0.26        0.01        0.07 o
  24   4   2        1.36        2.91        0.36 o
  25   4   2        0.31        1.16        0.11 o
  26   4   2        0.98        0.66        0.14 o
  27   4   2        2.41        1.55        0.80 o
  28   4   2       10.93       11.54        0.88 o
  29   4   2        4.38        3.90        1.92 o
  30   4   2        1.53        1.97        0.63 o
  31   4   2        1.01        0.90        0.39 o
  32   4   2        1.16        1.03        0.59 o
  33   4   2       -1.06        0.62        0.38 o
   1   5   2       67.85       69.69        2.29 o
   2   5   2       28.67       32.24        1.50 o
   3   5   2        7.18        6.70        1.47 o
   4   5   2      144.21      143.02        2.88 o
   5   5   2       36.70       36.03        1.29 o
   6   5   2       81.33       80.82        1.98 o
   7   5   2        9.03        8.59        0.59 o
   8   5   2      410.12      402.81        5.24 o
   9   5   2      176.53      186.73        2.54 o
  10   5   2        2.10        2.11        0.48 o
  11   5   2      147.76      150.92        2.27 o
  12   5   2        0.90        0.42        0.10 o
  13   5   2       53.58       56.78        1.18 o
  14   5   2      111.31      122.42        1.91 o
  15   5   2        1.13        0.39        0.29 o
  16   5   2       17.53       20.89        0.77 o
  17   5   2       -0.17        0.02        0.07 o
  18   5   2       13.06       14.25        0.62 o
  19   5   2       12.44       11.74        0.64 o
  20   5   2        3.87        3.10        1.10 o
  21   5   2        3.46        3.11        0.96 o
  22   5   2        0.77        1.17        0.10 o
  23   5   2       28.29       28.31        1.01 o
  24   5   2        9.89        9.44        0.76 o
  25   5   2       -0.25        0.02        0.16 o
  26   5   2       51.68       49.57        1.48 o
  27   5   2       19.15       18.66        1.05 o
  28   5   2       14.05       15.19        0.98 o
  29   5   2        2.85        2.83        1.20 o
  30   5   2       98.71       96.86        2.28 o
  31   5   2       22.89       22.73        1.22 o
   0   6   2       23.04       28.40        2.02 o
   1   6   2        5.19        4.63        2.72 o
   2   6   2        0.94        0.26        0.20 o
   3   6   2       16.37       18.54        1.26 o
   4   6   2        8.35        8.04        1.00 o
   5   6   2       17.38       20.65        1.29 o
   6   6   2       18.33       17.49        1.38 o
   7   6   2       14.55       12.28        1.26 o
   8   6   2        2.31        1.86        0.84 o
   9   6   2        8.56        8.20        0.87 o
  10   6   2       14.87       12.97        0.78 o
  11   6   2        3.62        3.03        1.10 o
  12   6   2        7.09        6.62        0.81 o
  13   6   2        7.66        7.88        0.94 o
  14   6   2        4.53        4.32        1.72 o
  15   6   2        1.38        1.65        0.44 o
  16   6   2        9.42       10.04        0.67 o
  17   6   2        6.55        6.79        1.90 o
  18   6   2        3.91        4.54        1.44 o
  19   6   2        6.84        5.45        0.88 o
  20   6   2        0.61        1.61        0.15 o
  21   6   2        0.40        0.52        0.14 o
  22   6   2        9.38        6.64        0.86 o
  23   6   2        1.54        0.59        0.54 o
  24   6   2        0.43        0.10        0.12 o
  25   6   2        5.04        4.22        1.62 o
  26   6   2        1.68        2.28        0.58 o
  27   6   2        5.17        5.31        2.20 o
  28   6   2        6.23        6.58        2.88 o
   1   7   2       32.58       33.71        1.79 o
   2   7   2       28.30       29.71        1.62 o
   3   7   2       -0.91        0.00        0.20 o
   4   7   2       72.57       73.69        2.53 o
   5   7   2        2.12        0.35        1.11 o
   6   7   2       11.25       12.39        1.19 o
   7   7   2        9.53       10.50        1.14 o
   8   7   2      106.52      109.09        3.26 o
   9   7   2       49.69       55.16        2.14 o
  10   7   2        1.25        0.53        0.63 o
  11   7   2       31.20       37.25        1.79 o
  12   7   2        0.72        0.39        0.14 o
  13   7   2       18.10       15.41        1.11 o
  14   7   2       25.63       28.19        1.23 o
  15   7   2        1.75        1.80        0.78 o
  16   7   2        0.97        1.91        0.20 o
  17   7   2        3.75        3.88        1.77 o
  18   7   2       13.72       13.77        1.14 o
  19   7   2        1.62        1.51        0.77 o
  20   7   2        5.95        4.97        2.56 o
  21   7   2        0.90        2.06        0.21 o
  22   7   2        1.17        0.00        0.52 o
  23   7   2       16.19       13.95        1.09 o
  24   7   2       10.14       10.50        0.96 o
   0   8   2       35.91       37.58        2.70 o
   1   8   2        3.71        4.02        2.20 o
   2   8   2        2.39        4.78        1.39 o
   3   8   2       39.52       43.61        1.98 o
   4   8   2        0.44        0.25        0.17 o
   5   8   2       18.60       21.20        1.50 o
   6   8   2        7.24        6.26        1.67 o
   7   8   2        1.11        0.27        0.59 o
   8   8   2        2.43        2.09        1.41 o
   9   8   2        0.03        0.01        0.14 o
  10   8   2        0.37        0.52        0.16 o
  11   8   2        1.62        1.34        0.87 o
  12   8   2        0.24        0.13        0.25 o
  13   8   2       -0.67        0.00        0.20 o
  14   8   2        1.08        1.97        0.62 o
  15   8   2        3.03        4.89        1.84 o
  16   8   2        6.09        6.91        2.83 o
  17   8   2        9.90        9.85        0.99 o
  18   8   2        0.74        0.02        0.23 o
  19   8   2       30.50       28.70        1.51 o
   1   9   2        7.95        7.48        1.19 o
   2   9   2       11.93       10.97        1.36 o
   3   9   2        1.92        1.37        1.11 o
   4   9   2       19.51       16.32        1.57 o
   5   9   2        2.22        1.72        1.32 o
   6   9   2       -0.24        0.01        0.12 o
   7   9   2        2.76        3.23        1.60 o
   8   9   2        5.83        5.78        2.81 o
   9   9   2        4.82        6.41        3.09 o
  10   9   2       -0.47        0.50        0.18 o
  11   9   2        2.06        1.43        1.30 o
   1   1   3        0.11        0.47        0.03 o
   2   1   3        6.90        3.35        0.32 o
   3   1   3       10.62        6.45        0.31 o
   4   1   3      313.73      305.71        2.47 o
   5   1   3       88.00       79.05        0.90 o
   6   1   3     2517.45     2474.65       17.64 o
   7   1   3      200.12      218.81        1.62 o
   8   1   3       26.75       27.43        0.44 o
   9   1   3       13.04       16.58        0.33 o
  10   1   3        1.59        2.21        0.18 o
  11   1   3       -0.08        0.02        0.04 o
  12   1   3       11.80       13.04        0.35 o
  13   1   3       16.94       20.28        0.41 o
  14   1   3       27.28       26.91        0.53 o
  15   1   3       66.26       64.15        0.85 o
  16   1   3     1205.32     1315.79        9.38 o
  17   1   3       71.52       79.45        0.95 o
  18   1   3      221.88      242.13        2.24 o
  19   1   3        1.57        2.69        0.24 o
  20   1   3       74.96       85.13        1.04 o
  21   1   3        1.20        1.14        0.23 o
  22   1   3        0.55        0.29        0.08 o
  23   1   3        0.13        0.22        0.07 o
  24   1   3       13.84       13.76        0.57 o
  25   1   3        0.08        0.40        0.07 o
  26   1   3       13.49       14.44        0.59 o
  27   1   3        1.06        0.28        0.25 o
  28   1   3       63.36       64.68        1.30 o
  29   1   3       18.68       14.98        0.93 o
  30   1   3       -0.04        0.16        0.16 o
  31   1   3        4.83        2.46        2.17 o
  32   1   3       -0.94        0.11        0.20 o
  33   1   3        0.45        0.39        0.16 o
  34   1   3        2.04        3.70        0.83 o
  35   1   3        3.05        2.50        1.39 o
   0   2   3        0.77        1.30        0.05 o
   1   2   3       28.92       29.83        0.39 o
   2   2   3       15.12       13.89        0.30 o
   3   2   3        0.12        0.30        0.03 o
   4   2   3       58.02       63.56        0.60 o
   5   2   3      783.00      794.39        5.64 o
   6   2   3       50.14       50.88        0.52 o
   7   2   3      152.39      161.64        1.17 o
   8   2   3        3.14        4.46        0.36 o
   9   2   3       56.52       59.86        0.65 o
  10   2   3        0.39        0.18        0.04 o
  11   2   3       -0.04        0.20        0.04 o
  12   2   3        0.45        0.09        0.06 o
  13   2   3        1.88        2.25        0.29 o
  14   2   3        0.79        0.94        0.06 o
  15   2   3       38.65       38.26        0.72 o
  16   2   3        5.86        6.38        1.04 o
  17   2   3      167.96      164.91        1.97 o
  18   2   3       26.64       20.73        0.65 o
  19   2   3        3.36        3.85        0.69 o
  20   2   3        4.08        3.73        0.94 o
  21   2   3        4.86        5.82        1.21 o
  22   2   3       -0.25        0.03        0.06 o
  23   2   3        6.04        5.72        1.33 o
  24   2   3        3.32        2.67        0.84 o
  25   2   3        0.37        0.29        0.09 o
  26   2   3        5.63        5.28        1.55 o
  27   2   3      112.44      106.15        2.04 o
  28   2   3       10.17        8.28        0.67 o
  29   2   3       32.49       31.51        1.01 o
  30   2   3        1.33        0.89        0.39 o
  31   2   3       17.24       15.20        0.88 o
  32   2   3       -0.10        0.50        0.17 o
  33   2   3       -0.35        0.25        0.14 o
  34   2   3        0.19        0.04        0.13 o
   1   3   3        0.33        0.60        0.05 o
   2   3   3        3.54        5.38        0.58 o
   3   3   3        0.01        0.41        0.03 o
   4   3   3       42.10       33.49        0.61 o
   5   3   3        8.96        6.10        0.34 o
   6   3   3      429.63      401.06        4.05 o
   7   3   3       38.23       49.20        0.65 o
   8   3   3       32.56       33.54        0.64 o
   9   3   3        0.87        1.02        0.08 o
  10   3   3       14.24       14.50        0.43 o
  11   3   3        1.52        1.12        0.23 o
  12   3   3        1.78        1.38        0.25 o
  13   3   3        1.70        2.53        0.28 o
  14   3   3       26.20       25.12        0.66 o
  15   3   3       19.90       15.35        0.62 o
  16   3   3      325.14      352.21        3.66 o
  17   3   3       16.01       17.25        0.59 o
  18   3   3       53.34       57.02        1.00 o
  19   3   3        0.28        0.04        0.08 o
  20   3   3       14.72       17.57        0.65 o
  21   3   3       -0.67        0.32        0.09 o
  22   3   3        0.54        0.04        0.11 o
  23   3   3       -0.23        0.07        0.07 o
  24   3   3       15.39       13.93        0.74 o
  25   3   3       -0.16        0.04        0.05 o
  26   3   3        2.08        2.06        0.62 o
  27   3   3        0.09        0.02        0.08 o
  28   3   3       15.26       17.22        0.89 o
  29   3   3        5.29        4.50        2.08 o
  30   3   3        0.94        1.27        0.20 o
  31   3   3        1.38        0.27        0.53 o
  32   3   3        5.12        3.77        2.68 o
  33   3   3       -0.90        0.71        0.18 o
   0   4   3        0.34        0.78        0.15 o
   1   4   3        7.05        7.52        0.81 o
   2   4   3       13.22       11.80        0.70 o
   3   4   3       -0.03        0.22        0.05 o
   4   4   3       73.15       75.89        1.33 o
   5   4   3      606.40      601.79        7.56 o
   6   4   3       34.83       36.05        0.91 o
   7   4   3      137.72      134.36        1.58 o
   8   4   3        0.03        0.10        0.05 o
   9   4   3       59.97       63.64        0.97 o
  10   4   3       -0.04        0.15        0.05 o
  11   4   3        0.17        0.15        0.05 o
  12   4   3        0.34        0.23        0.07 o
  13   4   3        2.01        1.48        0.39 o
  14   4   3        0.11        0.03        0.04 o
  15   4   3       31.94       32.98        0.80 o
  16   4   3        3.79        3.86        0.78 o
  17   4   3      158.27      153.70        2.02 o
  18   4   3       32.31       30.93        0.83 o
  19   4   3        2.16        2.05        0.59 o
  20   4   3        4.92        4.54        1.56 o
  21   4   3        1.93        2.23        0.50 o
  22   4   3       -0.13        0.04        0.11 o
  23   4   3        3.13        3.49        0.97 o
  24   4   3        3.02        3.33        1.07 o
  25   4   3        1.58        1.26        0.52 o
  26   4   3        9.70        8.70        0.83 o
  27   4   3      170.98      168.83        3.52 o
  28   4   3       16.49       12.59        1.10 o
  29   4   3       54.85       49.89        1.77 o
  30   4   3        1.89        1.02        0.79 o
  31   4   3       29.22       26.54        1.38 o
   1   5   3        0.61        0.12        0.16 o
   2   5   3       16.84       17.06        1.34 o
   3   5   3       -0.38        0.04        0.13 o
   4   5   3        0.63        0.34        0.11 o
   5   5   3       -0.29        0.00        0.08 o
   6   5   3       32.07       30.59        1.05 o
   7   5   3       -0.24        0.05        0.07 o
   8   5   3       28.92       32.08        1.02 o
   9   5   3        3.20        2.34        1.00 o
  10   5   3       38.14       39.28        1.00 o
  11   5   3        4.10        3.72        0.87 o
  12   5   3       12.24       13.10        0.58 o
  13   5   3        0.57        0.63        0.09 o
  14   5   3       14.81       14.22        0.65 o
  15   5   3       -0.46        0.04        0.09 o
  16   5   3       22.25       25.41        0.80 o
  17   5   3       -0.36        0.26        0.11 o
  18   5   3        0.35        1.14        0.10 o
  19   5   3        0.44        0.01        0.13 o
  20   5   3        0.79        0.59        0.16 o
  21   5   3       -0.90        0.00        0.17 o
  22   5   3       -0.25        0.00        0.11 o
  23   5   3        0.37        0.00        0.10 o
  24   5   3       10.95       10.63        0.82 o
  25   5   3        0.32        0.09        0.17 o
  26   5   3       -1.38        0.03        0.45 o
  27   5   3        0.83        0.14        0.15 o
  28   5   3        0.89        1.09        0.17 o
  29   5   3       -0.05        0.03        0.14 o
   0   6   3        1.15        1.73        0.73 o
   1   6   3        1.92        3.50        1.00 o
   2   6   3        0.37        1.00        0.17 o
   3   6   3        6.17        5.37        4.01 o
   4   6   3       27.36       26.26        1.69 o
   5   6   3      318.90      337.04        7.38 o
   6   6   3       20.47       16.79        0.95 o
   7   6   3       68.74       69.86        1.62 o
   8   6   3       -0.20        0.08        0.10 o
   9   6   3       30.79       30.81        1.12 o
  10   6   3       -0.05        0.21        0.10 o
  11   6   3       -0.34        0.40        0.09 o
  12   6   3        0.24        0.13        0.18 o
  13   6   3       -0.77        0.57        0.11 o
  14   6   3        0.16        0.01        0.11 o
  15   6   3       16.18       16.78        0.81 o
  16   6   3        1.99        1.59        0.63 o
  17   6   3       78.95       84.12        1.91 o
  18   6   3       15.31       13.39        1.00 o
  19   6   3        0.03        0.23        0.12 o
  20   6   3        0.17        0.64        0.13 o
  21   6   3        3.50        2.00        1.60 o
  22   6   3        1.21        1.06        0.55 o
  23   6   3        0.22        0.04        0.21 o
  24   6   3        0.74        0.75        0.24 o
  25   6   3        1.84        1.48        0.90 o
  26   6   3        4.18        4.10        2.18 o
   1   7   3        1.48        0.12        0.78 o
   2   7   3       33.39       31.37        1.91 o
   3   7   3        0.54        0.01        0.20 o
   4   7   3        3.84        5.66        2.39 o
   5   7   3        3.81        2.04        2.33 o
   6   7   3       13.51       14.36        1.43 o
   7   7   3        4.90        4.57        1.81 o
   8   7   3       13.95       13.41        1.11 o
   9   7   3        2.45        2.41        1.06 o
  10   7   3       18.46       17.80        1.23 o
  11   7   3        1.48        0.84        0.66 o
  12   7   3        5.66        6.11        2.39 o
  13   7   3        0.45        1.12        0.20 o
  14   7   3        3.32        3.31        1.70 o
  15   7   3        1.95        3.08        0.93 o
  16   7   3       13.25       12.79        1.18 o
  17   7   3        2.59        2.13        1.07 o
  18   7   3        6.30        6.38        2.03 o
  19   7   3       -0.02        0.13        0.16 o
  20   7   3       15.23       12.37        1.05 o
  21   7   3        0.45        0.22        0.20 o
  22   7   3       -0.27        0.16        0.18 o
   0   8   3        1.82        3.42        1.60 o
   1   8   3       15.26       14.13        1.57 o
   2   8   3        1.21        0.12        0.77 o
   3   8   3        6.00        6.19        3.26 o
   4   8   3        5.29        3.84        2.40 o
   5   8   3       61.72       64.82        2.62 o
   6   8   3        6.40        2.43        3.60 o
   7   8   3       14.26       13.60        1.19 o
   8   8   3        1.08        0.00        0.64 o
   9   8   3        2.31        1.65        1.13 o
  10   8   3        0.34        0.03        0.29 o
  11   8   3       -1.37        0.20        0.59 o
  12   8   3       -0.27        0.06        0.27 o
  13   8   3        1.12        0.99        0.73 o
  14   8   3       -0.97        0.01        0.21 o
  15   8   3        2.72        3.16        1.60 o
  16   8   3        0.29        0.11        0.17 o
   1   9   3       -0.37        0.07        0.18 o
   2   9   3       17.52       15.19        1.74 o
   3   9   3        1.62        0.04        1.05 o
   0   0   4       35.91       40.13        1.12 o
   1   0   4      235.50      244.43        2.67 o
   2   0   4       70.72       77.29        1.09 o
   3   0   4      923.56      991.30        9.40 o
   4   0   4      303.83      335.28        3.35 o
   5   0   4       74.66       64.01        1.12 o
   6   0   4        5.12       10.72        1.01 o
   7   0   4      180.78      164.83        2.16 o
   8   0   4      132.78      125.88        1.71 o
   9   0   4        5.46        2.70        1.03 o
  10   0   4       43.49       42.22        0.84 o
  11   0   4        0.21        0.76        0.05 o
  12   0   4       47.03       52.97        0.89 o
  13   0   4       18.66       27.05        0.61 o
  14   0   4       57.16       58.61        1.13 o
  15   0   4      114.89      130.14        1.78 o
  16   0   4        3.26        5.75        0.82 o
  17   0   4       49.56       56.98        1.09 o
  18   0   4      204.68      221.18        2.80 o
  19   0   4      418.70      452.79        5.10 o
  20   0   4       19.78       16.11        0.86 o
  21   0   4       96.05      101.73        1.84 o
  22   0   4       20.08       21.64        0.89 o
  23   0   4       23.81       21.26        0.97 o
  24   0   4        6.72        5.62        1.94 o
  25   0   4       89.12       86.74        2.35 o
  26   0   4       21.88       17.19        1.30 o
  27   0   4        0.00        0.02        0.12 o
  28   0   4       50.77       42.71        2.06 o
  29   0   4       11.22        8.70        1.21 o
  30   0   4        7.78        7.76        1.11 o
  31   0   4       11.02       10.97        1.23 o
  32   0   4        0.00        0.04        0.26 o
  33   0   4       -0.40        0.03        0.27 o
   1   1   4        3.97        4.03        0.58 o
   2   1   4        0.53        0.51        0.05 o
   3   1   4       13.74       13.75        0.39 o
   4   1   4       12.53       13.77        0.38 o
   5   1   4        1.25        1.40        0.17 o
   6   1   4       22.22       21.37        0.47 o
   7   1   4       34.76       35.19        0.57 o
   8   1   4      105.53      117.01        1.12 o
   9   1   4        1.45        1.27        0.20 o
  10   1   4       19.40       19.58        0.44 o
  11   1   4        6.81        8.16        0.42 o
  12   1   4        9.23        9.35        0.41 o
  13   1   4        1.19        0.93        0.18 o
  14   1   4       48.52       48.93        0.73 o
  15   1   4       10.31        9.23        0.40 o
  16   1   4        3.83        4.49        0.76 o
  17   1   4        3.53        2.00        0.73 o
  18   1   4        2.68        1.78        0.53 o
  19   1   4        3.50        2.89        0.80 o
  20   1   4        1.15        0.91        0.25 o
  21   1   4        0.24        0.01        0.07 o
  22   1   4        0.43        0.17        0.09 o
  23   1   4        0.15        0.92        0.08 o
  24   1   4        0.15        0.23        0.09 o
  25   1   4        0.71        1.33        0.10 o
  26   1   4        2.01        2.89        0.54 o
  27   1   4        1.40        1.60        0.40 o
  28   1   4        5.04        3.91        1.91 o
  29   1   4        4.50        4.19        1.87 o
  30   1   4       11.59       11.79        0.88 o
  31   1   4       -0.74        0.04        0.15 o
  32   1   4        1.35        1.76        0.48 o
  33   1   4        1.72        0.75        0.79 o
   0   2   4       10.92        9.55        0.46 o
   1   2   4       97.66       98.43        0.93 o
   2   2   4       40.05       43.64        0.57 o
   3   2   4      353.56      354.36        2.70 o
   4   2   4      142.67      151.39        1.25 o
   5   2   4        9.48        5.71        0.31 o
   6   2   4       12.71       19.47        0.36 o
   7   2   4       92.47       81.78        0.93 o
   8   2   4       53.32       53.52        0.66 o
   9   2   4        3.10        1.68        0.44 o
  10   2   4       22.48       20.36        0.54 o
  11   2   4        0.15        0.19        0.05 o
  12   2   4       23.08       27.88        0.55 o
  13   2   4       16.15       20.98        0.51 o
  14   2   4       24.86       25.46        0.60 o
  15   2   4       74.62       77.88        1.07 o
  16   2   4        0.25        0.82        0.06 o
  17   2   4       15.27       17.95        0.55 o
  18   2   4      120.30      126.43        1.59 o
  19   2   4      204.98      218.55        2.40 o
  20   2   4       16.22       14.08        0.60 o
  21   2   4       51.92       55.59        0.98 o
  22   2   4       10.01        9.97        0.53 o
  23   2   4        9.35        9.75        0.55 o
  24   2   4        4.49        4.01        1.33 o
  25   2   4       39.66       38.06        1.03 o
  26   2   4       10.60        9.76        0.81 o
  27   2   4        0.10        0.65        0.08 o
  28   2   4       34.88       30.97        1.29 o
  29   2   4        8.13        7.40        1.21 o
  30   2   4        3.93        5.31        1.91 o
  31   2   4        7.01        6.39        1.17 o
  32   2   4        0.99        0.01        0.21 o
   1   3   4        6.22        5.23        1.00 o
   2   3   4        0.12        0.35        0.04 o
   3   3   4       31.54       30.67        0.55 o
   4   3   4       32.75       29.76        0.57 o
   5   3   4       -0.15        0.01        0.03 o
   6   3   4       39.70       38.14        0.69 o
   7   3   4      122.43      122.27        1.50 o
   8   3   4      312.83      325.76        3.37 o
   9   3   4        5.04        4.29        0.88 o
  10   3   4       55.10       56.28        0.81 o
  11   3   4       25.56       25.55        0.55 o
  12   3   4       24.98       25.89        0.56 o
  13   3   4        3.95        3.02        0.70 o
  14   3   4      154.78      145.61        1.77 o
  15   3   4       37.77       33.49        0.72 o
  16   3   4        7.35        7.01        0.49 o
  17   3   4       20.67       18.09        0.57 o
  18   3   4        7.24        4.77        0.59 o
  19   3   4       10.51        9.47        0.52 o
  20   3   4        5.42        6.30        1.12 o
  21   3   4        0.18        0.10        0.10 o
  22   3   4        1.58        0.65        0.41 o
  23   3   4        4.68        4.01        1.40 o
  24   3   4        2.32        1.49        0.73 o
  25   3   4        5.83        5.65        1.85 o
  26   3   4       15.53       14.74        0.87 o
  27   3   4        8.81        6.57        0.74 o
  28   3   4       17.86       16.39        0.96 o
  29   3   4       24.53       21.26        1.10 o
  30   3   4       61.30       53.34        1.62 o
  31   3   4        1.18        0.12        0.40 o
   0   4   4       -0.04        0.09        0.05 o
   1   4   4       12.41       10.85        0.49 o
   2   4   4       18.00       16.92        0.58 o
   3   4   4       25.65       25.07        0.66 o
   4   4   4       20.38       22.24        0.60 o
   5   4   4        4.80        4.60        1.05 o
   6   4   4        7.16        6.89        0.58 o
   7   4   4       41.69       42.68        0.77 o
   8   4   4       11.67       11.13        0.48 o
   9   4   4        7.11        6.91        0.65 o
  10   4   4        9.46        9.12        0.48 o
  11   4   4       -0.04        0.13        0.04 o
  12   4   4        7.22        8.44        0.53 o
  13   4   4       16.67       18.28        0.64 o
  14   4   4        3.61        3.01        0.89 o
  15   4   4       29.85       30.46        0.84 o
  16   4   4        0.46        0.08        0.10 o
  17   4   4        0.35        0.00        0.08 o
  18   4   4       19.61       22.12        0.76 o
  19   4   4       20.53       23.62        0.78 o
  20   4   4       11.18        9.72        0.66 o
  21   4   4        9.77       10.48        0.66 o
  22   4   4       -0.08        0.71        0.06 o
  23   4   4        0.36        0.63        0.08 o
  24   4   4        2.36        1.83        0.88 o
  25   4   4        1.66        1.54        0.64 o
  26   4   4        2.25        1.98        0.90 o
  27   4   4        3.73        3.63        1.56 o
  28   4   4        9.23        9.13        0.90 o
  29   4   4       10.35        6.63        0.96 o
   1   5   4        4.40        3.43        1.65 o
   2   5   4        3.81        3.97        1.14 o
   3   5   4       27.18       26.18        0.90 o
   4   5   4       41.63       43.81        1.08 o
   5   5   4        0.67        0.49        0.15 o
   6   5   4       15.65       15.68        0.89 o
   7   5   4      105.15      101.79        2.40 o
   8   5   4      223.65      227.46        4.22 o
   9   5   4        5.68        4.81        2.01 o
  10   5   4       33.06       33.48        1.35 o
  11   5   4       25.06       26.18        0.92 o
  12   5   4       11.95       12.51        0.63 o
  13   5   4        4.70        3.97        1.49 o
  14   5   4      105.53       98.85        2.05 o
  15   5   4       36.57       32.46        1.17 o
  16   5   4        0.11        1.23        0.12 o
  17   5   4       22.48       20.24        1.25 o
  18   5   4       10.49       10.35        0.99 o
  19   5   4        9.50        9.62        0.97 o
  20   5   4        2.66        2.91        1.20 o
  21   5   4        0.34        0.26        0.12 o
  22   5   4       -0.40        0.15        0.13 o
  23   5   4        3.87        3.43        2.10 o
  24   5   4        5.49        4.49        3.14 o
  25   5   4        7.38        5.22        1.07 o
  26   5   4       19.54       18.81        1.48 o
   0   6   4        4.04        6.06        2.38 o
   1   6   4       -1.40        0.16        0.41 o
   2   6   4        5.26        4.37        2.82 o
   3   6   4       12.17       12.06        1.08 o
   4   6   4        0.40        0.77        0.20 o
   5   6   4       18.66       15.08        1.27 o
   6   6   4        1.72        0.68        0.57 o
   7   6   4        8.74       10.79        0.78 o
   8   6   4       -0.37        0.02        0.12 o
   9   6   4        5.44        6.53        2.17 o
  10   6   4        4.56        3.80        2.22 o
  11   6   4        0.57        0.47        0.17 o
  12   6   4        1.45        1.36        0.92 o
  13   6   4        7.24        7.69        1.80 o
  14   6   4        1.82        0.72        1.05 o
  15   6   4        3.47        3.47        2.27 o
  16   6   4        1.41        1.06        0.62 o
  17   6   4        6.96        6.33        1.51 o
  18   6   4        1.26        0.24        0.55 o
  19   6   4        7.16        4.55        1.27 o
  20   6   4        6.49        5.13        2.02 o
  21   6   4        0.02        0.26        0.15 o
  22   6   4        0.72        1.24        0.17 o
  23   6   4        1.10        0.07        0.49 o
   1   7   4        0.52        1.27        0.19 o
   2   7   4        8.02        8.85        1.02 o
   3   7   4        9.95       10.20        1.08 o
   4   7   4       36.16       35.14        1.68 o
   5   7   4        1.17        0.86        0.59 o
   6   7   4        0.31        0.57        0.14 o
   7   7   4       33.62       34.26        1.61 o
   8   7   4       60.93       60.28        2.12 o
   9   7   4        5.28        3.63        3.06 o
  10   7   4       10.02       10.92        1.52 o
  11   7   4       10.92        9.33        1.19 o
  12   7   4        4.51        3.14        2.52 o
  13   7   4        1.93        2.67        0.93 o
  14   7   4       21.52       21.74        1.50 o
  15   7   4       11.57       12.75        1.23 o
  16   7   4        1.18        0.70        1.01 o
  17   7   4       10.21        9.61        1.40 o
  18   7   4       10.88       11.76        1.47 o
   0   8   4        8.56        9.81        1.27 o
   1   8   4        0.74        0.17        0.24 o
   2   8   4        1.39        0.41        0.78 o
   3   8   4       28.43       27.34        1.61 o
   4   8   4        8.06        8.61        1.34 o
   5   8   4        8.74        8.60        1.49 o
   6   8   4       -0.04        0.05        0.18 o
   7   8   4        0.02        0.03        0.17 o
   8   8   4        1.82        2.10        0.96 o
   9   8   4        0.47        1.13        0.27 o
  10   8   4        0.58        1.66        0.22 o
   1   1   5      199.73      219.75        1.87 o
   2   1   5        2.22        1.67        0.38 o
   3   1   5      222.40      230.14        1.96 o
   4   1   5      450.92      464.54        3.77 o
   5   1   5        9.81        9.46        0.44 o
   6   1   5       17.34       15.53        0.48 o
   7   1   5        1.36        1.55        0.21 o
   8   1   5       14.37       13.76        0.45 o
   9   1   5        0.81        2.08        0.06 o
  10   1   5       16.03       17.00        0.45 o
  11   1   5        0.07        0.00        0.05 o
  12   1   5        2.40        2.58        0.38 o
  13   1   5       29.58       37.33        0.63 o
  14   1   5       52.06       57.83        0.84 o
  15   1   5        0.40        0.17        0.08 o
  16   1   5       32.97       40.19        0.69 o
  17   1   5        6.66        6.64        1.26 o
  18   1   5      144.60      146.34        1.75 o
  19   1   5       53.53       52.53        1.08 o
  20   1   5        2.47        2.58        0.64 o
  21   1   5       51.08       56.57        1.22 o
  22   1   5        6.12        7.82        1.68 o
  23   1   5       39.79       40.56        1.21 o
  24   1   5        0.88        0.04        0.17 o
  25   1   5       70.36       65.64        1.65 o
  26   1   5       90.00       80.76        1.85 o
  27   1   5        0.98        0.75        0.20 o
  28   1   5        0.13        0.13        0.13 o
  29   1   5        1.91        1.48        0.66 o
   0   2   5        2.14        3.15        0.44 o
   1   2   5       13.64       14.89        0.41 o
   2   2   5       11.23       11.00        0.39 o
   3   2   5       19.19       18.68        0.48 o
   4   2   5        0.08        0.04        0.05 o
   5   2   5       23.91       26.00        0.51 o
   6   2   5        9.38       10.05        0.37 o
   7   2   5       79.88       82.05        0.96 o
   8   2   5       38.47       40.07        0.68 o
   9   2   5        0.86        0.98        0.07 o
  10   2   5       48.41       50.65        0.77 o
  11   2   5        0.49        0.92        0.08 o
  12   2   5       34.10       35.13        0.80 o
  13   2   5        0.48        0.20        0.08 o
  14   2   5       39.99       38.18        0.88 o
  15   2   5       60.16       55.94        1.12 o
  16   2   5        2.06        1.99        0.50 o
  17   2   5        4.08        4.80        1.09 o
  18   2   5        0.85        0.26        0.11 o
  19   2   5        1.01        0.56        0.31 o
  20   2   5        0.69        0.64        0.10 o
  21   2   5       10.00       11.35        0.68 o
  22   2   5        0.69        0.12        0.13 o
  23   2   5        2.36        2.93        0.73 o
  24   2   5       16.07       14.31        1.00 o
  25   2   5        8.51        8.20        0.87 o
  26   2   5       -0.07        0.02        0.16 o
  27   2   5        9.64        9.78        0.97 o
  28   2   5        4.47        3.43        1.62 o
  29   2   5        6.74        6.75        2.32 o
   1   3   5       60.91       62.88        0.73 o
   2   3   5        0.51        0.65        0.06 o
   3   3   5       75.33       72.91        0.92 o
   4   3   5      152.46      148.60        1.69 o
   5   3   5        0.61        0.44        0.06 o
   6   3   5        0.17        0.05        0.05 o
   7   3   5        1.93        2.01        0.32 o
   8   3   5        0.20        0.14        0.05 o
   9   3   5        5.56        7.62        1.16 o
  10   3   5        0.16        0.24        0.05 o
  11   3   5        1.78        1.33        0.29 o
  12   3   5        0.83        0.88        0.07 o
  13   3   5        2.95        4.29        0.54 o
  14   3   5       12.77       13.20        0.52 o
  15   3   5        0.10        0.32        0.06 o
  16   3   5        5.24        6.24        1.35 o
  17   3   5       -0.11        0.11        0.09 o
  18   3   5       55.02       52.67        1.17 o
  19   3   5       20.17       19.11        0.76 o
  20   3   5        0.54        0.97        0.13 o
  21   3   5       13.27       15.98        0.88 o
  22   3   5        3.77        4.23        1.52 o
  23   3   5       14.26       14.84        0.98 o
  24   3   5        0.54        0.01        0.22 o
  25   3   5       28.01       26.01        1.26 o
  26   3   5       31.58       30.60        1.35 o
  27   3   5        0.09        0.24        0.11 o
   0   4   5        2.72        2.60        0.78 o
   1   4   5       16.72       17.69        0.57 o
   2   4   5        5.84        5.83        1.23 o
   3   4   5       15.05       13.92        0.61 o
   4   4   5        1.11        1.25        0.23 o
   5   4   5       24.67       24.49        0.72 o
   6   4   5       13.34       11.38        0.59 o
   7   4   5      120.73      109.78        1.65 o
   8   4   5       62.71       58.18        1.06 o
   9   4   5        1.79        1.56        0.35 o
  10   4   5       80.67       74.06        1.29 o
  11   4   5        1.17        1.48        0.24 o
  12   4   5       57.80       53.89        1.12 o
  13   4   5        0.99        0.39        0.15 o
  14   4   5       69.65       60.93        1.70 o
  15   4   5       88.85       82.34        2.01 o
  16   4   5        3.32        2.43        1.21 o
  17   4   5        3.12        3.47        1.12 o
  18   4   5        2.49        1.65        0.88 o
  19   4   5        0.20        0.00        0.14 o
  20   4   5        3.48        3.59        1.35 o
  21   4   5       14.64       14.83        0.96 o
  22   4   5       -0.49        0.05        0.12 o
  23   4   5        3.71        3.29        1.17 o
  24   4   5       23.41       21.33        0.94 o
  25   4   5       15.27       11.59        0.98 o
   1   5   5        2.49        2.69        0.73 o
   2   5   5        0.88        0.16        0.13 o
   3   5   5        8.47        7.31        0.66 o
   4   5   5       16.62       16.81        0.87 o
   5   5   5        2.49        1.17        0.81 o
   6   5   5        4.65        2.79        2.17 o
   7   5   5        0.20        0.49        0.19 o
   8   5   5        2.49        1.71        1.08 o
   9   5   5        7.34        4.74        0.88 o
  10   5   5       13.07       10.50        1.05 o
  11   5   5        3.94        3.38        1.92 o
  12   5   5       12.20       11.74        1.08 o
  13   5   5        1.89        1.21        0.65 o
  14   5   5        0.38        0.09        0.17 o
  15   5   5        0.76        0.03        0.16 o
  16   5   5        0.29        0.38        0.13 o
  17   5   5        4.31        2.99        2.32 o
  18   5   5        5.79        6.10        3.13 o
  19   5   5        0.91        1.89        0.27 o
  20   5   5       -0.34        0.11        0.17 o
  21   5   5        0.54        0.10        0.16 o
  22   5   5        1.38        1.32        0.73 o
   0   6   5        0.74        0.40        0.26 o
   1   6   5        1.41        0.88        0.66 o
   2   6   5        0.30        1.11        0.15 o
   3   6   5        2.49        2.60        1.24 o
   4   6   5        2.59        2.10        1.25 o
   5   6   5        8.25        9.77        0.98 o
   6   6   5        5.69        4.59        3.06 o
   7   6   5       63.37       65.50        2.10 o
   8   6   5       38.68       39.17        1.67 o
   9   6   5        1.89        1.07        0.99 o
  10   6   5       40.86       42.50        1.72 o
  11   6   5        1.01        0.98        0.49 o
  12   6   5       37.26       33.92        1.72 o
  13   6   5        2.22        0.56        1.16 o
  14   6   5       46.69       42.63        1.86 o
  15   6   5       54.24       48.70        2.00 o
  16   6   5        1.92        1.26        1.07 o
  17   6   5        0.57        0.66        0.19 o
  18   6   5        2.93        2.87        1.61 o
   1   7   5        2.56        5.20        1.38 o
   2   7   5       -1.01        0.02        0.57 o
   3   7   5        1.68        1.94        0.90 o
   4   7   5        1.19        0.74        0.51 o
   5   7   5        5.75        4.26        3.28 o
   6   7   5        7.59        4.96        1.25 o
   7   7   5        0.72        0.14        0.23 o
   8   7   5        2.38        1.66        1.23 o
   9   7   5        4.83        2.27        2.70 o
  10   7   5       10.26       11.05        1.10 o
  11   7   5        4.27        3.63        2.43 o
  12   7   5        9.86        9.21        1.11 o
   0   0   6      734.74      766.79       10.23 o
   1   0   6      160.17      163.73        2.01 o
   2   0   6       10.79       12.18        0.55 o
   3   0   6       13.39       14.04        0.64 o
   4   0   6       22.64       27.63        0.82 o
   5   0   6        2.20        3.11        0.57 o
   6   0   6        0.61        0.72        0.09 o
   7   0   6        0.01        0.00        0.07 o
   8   0   6       19.79       20.66        0.70 o
   9   0   6       20.74       22.32        0.71 o
  10   0   6       10.70       11.53        0.57 o
  11   0   6        6.49        7.88        1.47 o
  12   0   6        7.27       10.33        0.76 o
  13   0   6       13.35       12.15        0.65 o
  14   0   6        0.58        0.36        0.08 o
  15   0   6        1.74        1.23        0.46 o
  16   0   6        2.32        2.45        0.81 o
  17   0   6       -0.61        0.07        0.11 o
  18   0   6        1.13        0.64        0.38 o
  19   0   6        8.51        8.41        0.99 o
  20   0   6        5.15        5.00        1.86 o
  21   0   6       24.68       24.44        1.34 o
  22   0   6      188.41      183.87        3.97 o
  23   0   6       66.19       60.42        2.09 o
  24   0   6        1.91        3.12        0.86 o
  25   0   6        8.02        5.87        0.98 o
   1   1   6        0.48        0.00        0.07 o
   2   1   6        1.52        1.63        0.26 o
   3   1   6        0.12        0.20        0.06 o
   4   1   6        0.16        0.33        0.05 o
   5   1   6        1.02        1.66        0.18 o
   6   1   6       -0.37        0.02        0.05 o
   7   1   6        0.95        1.18        0.08 o
   8   1   6        1.35        1.46        0.26 o
   9   1   6        1.26        1.19        0.23 o
  10   1   6        8.14        9.00        0.47 o
  11   1   6       38.30       38.43        0.70 o
  12   1   6       12.96       12.48        0.48 o
  13   1   6        0.92        1.31        0.09 o
  14   1   6        1.35        1.48        0.27 o
  15   1   6        1.59        1.66        0.37 o
  16   1   6       -0.16        0.10        0.08 o
  17   1   6        0.03        0.42        0.12 o
  18   1   6        0.04        0.08        0.09 o
  19   1   6        0.54        0.19        0.15 o
  20   1   6        1.01        0.91        0.33 o
  21   1   6        1.40        0.66        0.50 o
  22   1   6        0.24        0.64        0.13 o
  23   1   6        1.08        1.02        0.39 o
  24   1   6        0.42        0.16        0.18 o
  25   1   6        0.52        0.58        0.16 o
   0   2   6      406.30      412.04        5.32 o
   1   2   6       80.72       83.23        1.05 o
   2   2   6        6.01        4.96        1.08 o
   3   2   6        5.70        5.59        1.11 o
   4   2   6       15.42       17.00        0.49 o
   5   2   6        3.15        3.23        0.65 o
   6   2   6        0.02        0.20        0.07 o
   7   2   6       -0.15        0.14        0.06 o
   8   2   6       20.48       21.38        0.55 o
   9   2   6       13.83       15.60        0.52 o
  10   2   6        6.17        7.27        1.33 o
  11   2   6        3.87        5.03        1.10 o
  12   2   6        4.39        7.23        1.31 o
  13   2   6        9.49        8.66        0.64 o
  14   2   6        2.06        2.00        0.58 o
  15   2   6       -0.09        0.26        0.09 o
  16   2   6       -0.01        0.16        0.07 o
  17   2   6        0.44        0.02        0.10 o
  18   2   6        0.24        0.18        0.13 o
  19   2   6        4.40        4.25        1.74 o
  20   2   6        2.93        2.68        1.15 o
  21   2   6       11.94       12.24        0.89 o
  22   2   6      111.54      106.83        2.41 o
  23   2   6       36.38       33.44        1.33 o
  24   2   6        0.96        1.17        0.19 o
   1   3   6        0.29        0.09        0.05 o
   2   3   6       12.90       13.79        0.46 o
   3   3   6       -0.16        0.07        0.06 o
   4   3   6        1.20        1.28        0.22 o
   5   3   6        4.10        4.02        0.92 o
   6   3   6        0.31        0.01        0.07 o
   7   3   6        6.05        5.53        1.54 o
   8   3   6        5.63        5.26        1.60 o
   9   3   6        4.13        4.30        1.21 o
  10   3   6       42.03       37.32        1.07 o
  11   3   6      166.47      156.10        2.67 o
  12   3   6       60.37       54.42        1.33 o
  13   3   6        5.66        4.65        1.81 o
  14   3   6        5.86        5.84        1.50 o
  15   3   6       10.22        8.68        0.62 o
  16   3   6        0.72        0.92        0.13 o
  17   3   6        0.40        0.91        0.12 o
  18   3   6        0.52        0.27        0.12 o
  19   3   6        1.57        1.79        0.54 o
  20   3   6        6.98        6.22        0.91 o
  21   3   6        3.93        3.61        1.63 o
  22   3   6        3.62        3.60        1.45 o
   0   4   6       81.33       78.53        3.17 o
   1   4   6        9.94        8.72        0.86 o
   2   4   6       -0.13        0.27        0.06 o
   3   4   6       -0.94        0.02        0.21 o
   4   4   6        2.96        4.94        1.66 o
   5   4   6        3.10        3.04        1.74 o
   6   4   6        3.91        4.16        2.34 o
   7   4   6        1.55        1.42        0.81 o
   8   4   6       16.34       14.79        0.97 o
   9   4   6        1.65        1.37        0.55 o
  10   4   6        1.04        1.86        0.38 o
  11   4   6        1.89        1.01        0.73 o
  12   4   6        1.28        1.58        0.52 o
  13   4   6        1.72        0.78        0.73 o
  14   4   6        7.14        6.02        0.86 o
  15   4   6        0.27        0.54        0.10 o
  16   4   6        2.19        1.84        1.02 o
  17   4   6        1.28        0.59        0.57 o
  18   4   6       -0.13        0.03        0.07 o
  19   4   6        1.65        0.35        0.73 o
  20   4   6        0.40        0.46        0.20 o
   1   5   6        0.81        0.13        0.29 o
   2   5   6       15.16       11.96        1.75 o
   3   5   6        0.20        0.28        0.13 o
   4   5   6        1.01        0.23        0.65 o
   5   5   6       -0.61        0.72        0.23 o
   6   5   6       -0.47        0.49        0.22 o
   7   5   6        8.35        7.53        1.41 o
   8   5   6        1.68        2.68        1.21 o
   9   5   6        5.59        3.44        4.25 o
  10   5   6       37.26       29.53        2.36 o
  11   5   6      176.06      140.90        5.86 o
  12   5   6       60.98       44.77        2.96 o
  13   5   6        5.05        3.21        4.24 o
  16   5   6        2.43        2.59        1.16 o
   0   6   6        1.68        0.00        1.21 o
   1   6   6        1.41        1.81        0.75 o
   2   6   6        0.84        0.25        0.27 o
   3   6   6        1.25        0.83        0.66 o
   4   6   6        0.30        0.00        0.25 o
   5   6   6       -0.37        0.93        0.25 o
   6   6   6        7.58        5.45        1.67 o
   7   6   6        3.50        1.74        2.01 o
   8   6   6        9.77        7.33        1.62 o
   9   6   6        0.27        0.92        0.20 o
  10   6   6        0.47        0.05        0.26 o
   1   1   7       31.63       33.00        0.75 o
   2   1   7       61.69       62.13        1.01 o
   3   1   7       60.88       61.17        1.00 o
   4   1   7        1.02        0.08        0.23 o
   5   1   7       10.87       10.16        0.62 o
   6   1   7        0.13        0.15        0.09 o
   7   1   7       17.01       15.68        0.72 o
   8   1   7        0.50        1.02        0.11 o
   9   1   7        1.40        1.08        0.41 o
  10   1   7       23.40       20.66        0.82 o
  11   1   7       14.53       13.46        0.69 o
  12   1   7       48.79       46.00        1.09 o
  13   1   7        7.62        9.26        0.71 o
  14   1   7        0.83        0.01        0.15 o
  15   1   7       31.08       33.39        1.01 o
  16   1   7        0.71        0.66        0.13 o
  17   1   7        4.39        4.76        1.71 o
  18   1   7        1.25        0.90        0.44 o
   0   2   7        0.61        0.63        0.14 o
   1   2   7       11.78       11.60        0.61 o
   2   2   7        5.63        6.18        1.62 o
   3   2   7        0.38        0.18        0.11 o
   4   2   7        9.35       10.55        0.60 o
   5   2   7        0.76        0.48        0.12 o
   6   2   7        0.63        1.28        0.14 o
   7   2   7       -0.28        0.04        0.10 o
   8   2   7       14.15       14.12        0.72 o
   9   2   7       17.62       16.75        0.80 o
  10   2   7        4.87        4.88        1.36 o
  11   2   7        0.42        1.04        0.10 o
  12   2   7        9.47        9.56        0.79 o
  13   2   7       14.71       13.25        0.91 o
  14   2   7        6.40        6.83        2.30 o
  15   2   7        0.15        0.67        0.13 o
  16   2   7        0.67        0.96        0.19 o
  17   2   7       -0.15        0.04        0.10 o
   1   3   7        9.50       10.54        0.60 o
   2   3   7       17.40       17.29        0.74 o
   3   3   7       25.06       23.11        0.87 o
   4   3   7        0.64        0.44        0.10 o
   5   3   7        5.79        4.59        1.79 o
   6   3   7        0.19        0.06        0.07 o
   7   3   7        2.99        2.93        0.97 o
   8   3   7        1.25        1.27        0.51 o
   9   3   7        0.10        0.42        0.06 o
  10   3   7        7.55        7.70        0.93 o
  11   3   7       12.97       13.24        1.12 o
  12   3   7       17.08       16.45        1.26 o
  13   3   7        0.54        0.57        0.16 o
  14   3   7       -0.13        0.43        0.18 o
  15   3   7       10.21       10.88        1.10 o
   0   4   7        4.72        4.27        3.21 o
   1   4   7       21.53       21.86        1.26 o
   2   4   7        6.30        6.28        2.22 o
   3   4   7       -0.27        0.03        0.15 o
   4   4   7       21.63       15.64        1.82 o
   5   4   7        1.41        1.42        0.85 o
   6   4   7        2.36        2.24        1.51 o
   7   4   7        0.88        0.03        0.28 o
   8   4   7       28.37       23.15        2.09 o
   9   4   7       32.14       26.62        2.09 o
  10   4   7        9.70        7.12        0.90 o
  11   4   7        2.96        1.84        1.23 o
   0   0   8       25.37       27.67        1.58 o
   1   0   8        5.95        6.87        2.26 o
   2   0   8       32.59       29.54        1.23 o
   3   0   8        7.18        7.56        0.97 o
   4   0   8        4.83        5.07        2.01 o
   5   0   8        2.44        1.09        0.95 o
   6   0   8        1.48        1.67        1.07 o
   1   1   8        1.44        1.03        0.44 o
   2   1   8        0.56        0.38        0.11 o
   3   1   8        0.21        0.23        0.10 o
   4   1   8        1.64        1.60        0.51 o
