# Supplementary material for: Competition between hydrogen bonding and dispersion interactions in the crystal structures of the primary amines
Source: Royal Society of Chemistry journal article supplement (doi:10.1039/c3ce42639d), 2014-01-01
Supplement: c3ce42639d3.fcf [file c3ce42639d3.fcf]

data_decylamine 
#  Decylamine in Pca2(1) at 150K                       
_audit_creation_date        "11-02-07"
_audit_creation_method      CRYSTALS 

_cell_length_a                    7.0660(4)
_cell_angle_alpha                 90
_cell_length_b                    26.8352(15)
_cell_angle_beta                  90
_cell_length_c                    5.5730(3)
_cell_angle_gamma                 90

# NOTE FO on scale of Fc,      5.57835
# Status flags: 
#    o - used in refinement 
#    < - excluded by I/sigmaI cutoff 
#    x - excluded for another reason  

loop_
_refln_index_h
_refln_index_k
_refln_index_l
_refln_F_squared_meas
_refln_F_squared_calc
_refln_F_squared_sigma
_refln_observed_status
   2   0   0    27973.01    31223.62      598.69 x
   4   0   0     3371.25     3164.95       90.16 o
   6   0   0       53.21       39.62        3.53 o
   8   0   0      281.15      323.09       12.12 o
   1   1   0        2.52        3.08        0.18 o
   2   1   0       59.57       61.23        1.43 o
   3   1   0        3.33        3.60        0.20 o
   4   1   0        0.36        0.25        0.06 o
   5   1   0        1.24        0.71        0.14 o
   6   1   0        2.36        1.21        0.32 o
   7   1   0       -0.62        0.00        0.07 <
   8   1   0        4.20        2.73        1.01 o
   9   1   0       -1.09        0.25        0.23 <
   0   2   0      231.83      235.90        5.95 o
   1   2   0       13.25       13.56        0.50 o
   2   2   0       57.76       61.39        1.17 o
   3   2   0       19.66       18.67        1.63 o
   4   2   0       46.12       36.70        1.95 o
   5   2   0        4.67        4.95        0.49 o
   6   2   0        5.20        5.16        0.60 o
   7   2   0       -0.41        0.53        0.10 <
   8   2   0        4.36        5.40        0.88 o
   9   2   0        4.82        4.30        1.07 o
   0   3   0      227.92      235.02        4.52 o
   1   3   0       24.48       26.16        1.71 o
   2   3   0       48.34       44.85        0.88 o
   3   3   0       32.79       33.50        0.87 o
   4   3   0       -0.24        0.00        0.06 <
   5   3   0       10.34        9.57        1.20 o
   6   3   0        3.82        3.18        0.46 o
   7   3   0       -1.76        0.13        0.30 <
   8   3   0        1.56        2.36        0.28 o
   9   3   0        0.86        1.18        0.09 o
   0   4   0      240.32      241.18        4.77 o
   1   4   0        7.94        8.28        0.31 o
   2   4   0       51.52       57.19        0.92 o
   3   4   0       20.15       20.10        1.62 o
   4   4   0       25.08       21.58        3.06 o
   5   4   0        7.30        5.16        0.76 o
   6   4   0        3.87        2.59        0.46 o
   7   4   0       -1.04        0.29        0.18 <
   8   4   0        2.59        1.10        0.51 o
   0   5   0      203.91      212.48        4.08 o
   1   5   0       35.37       35.57        0.71 o
   2   5   0       37.46       34.69        0.88 o
   3   5   0       45.22       46.33        0.95 o
   4   5   0        0.06        0.70        0.06 <
   5   5   0       11.47       11.67        1.27 o
   6   5   0        6.40        5.97        0.75 o
   7   5   0        2.28        0.44        0.41 o
   8   5   0        4.88        3.56        1.06 o
   0   6   0      248.24      252.19        4.75 o
   1   6   0       -1.21        0.02        0.12 <
   2   6   0       65.88       76.84        1.13 o
   3   6   0        4.86        4.90        0.26 o
   4   6   0       21.37       20.34        2.64 o
   5   6   0       -0.10        0.79        0.06 <
   6   6   0        5.42        4.80        0.69 o
   7   6   0        0.52        0.11        0.07 o
   8   6   0        1.87        0.26        0.46 o
   0   7   0      203.16      205.01        3.88 o
   1   7   0       53.10       54.85        0.94 o
   2   7   0       34.18       32.51        0.78 o
   3   7   0       65.66       74.27        1.34 o
   4   7   0       -0.03        1.12        0.06 <
   5   7   0       16.94       17.73        2.02 o
   6   7   0       10.50       10.62        1.29 o
   7   7   0        1.14        1.43        0.25 o
   8   7   0        7.36        6.23        1.70 o
   0   8   0      332.34      291.14        7.25 o
   1   8   0        5.86        5.52        0.27 o
   2   8   0      107.49      116.27        1.71 o
   3   8   0        0.36        0.90        0.06 o
   4   8   0       30.27       32.96        3.42 o
   5   8   0        2.94        3.83        0.26 o
   6   8   0       12.06       11.17        1.55 o
   7   8   0        7.26        4.21        1.44 o
   8   8   0        2.59        1.80        0.51 o
   0   9   0      243.46      249.75        4.67 o
   1   9   0      121.76      123.06        1.88 o
   2   9   0       67.88       65.27        1.20 o
   3   9   0      148.28      157.57        2.57 o
   4   9   0        1.27        1.16        0.13 o
   5   9   0       54.25       58.70        1.62 o
   6   9   0        4.36        4.35        0.49 o
   7   9   0       13.59       12.69        3.26 o
   8   9   0        4.67        4.26        0.95 o
   0  10   0      535.19      531.27       10.05 o
   1  10   0       33.70       30.32        0.96 o
   2  10   0      191.38      204.53        2.91 o
   3  10   0       24.89       27.10        2.74 o
   4  10   0       41.75       48.40        1.24 o
   5  10   0       41.34       44.52        1.64 o
   6  10   0        7.62        8.09        0.89 o
   7  10   0       43.25       40.04        5.60 o
   8  10   0        1.71        0.02        0.48 o
   0  11   0     2033.87     1993.16       37.65 o
   1  11   0     1114.36     1072.64       15.71 o
   2  11   0      898.64      884.39       13.33 o
   3  11   0     1486.22     1542.34       23.74 o
   4  11   0      148.84      159.50        2.91 o
   5  11   0      965.32     1008.75       18.52 o
   6  11   0        9.34        8.32        1.21 o
   7  11   0      498.72      500.28       16.92 o
   8  11   0        5.29        4.35        1.49 o
   0  12   0     1484.21     1384.18       27.58 o
   1  12   0     1309.16     1236.48       18.44 o
   2  12   0      713.39      678.84       10.66 o
   3  12   0     1883.70     1922.27       31.58 o
   4  12   0      120.46      132.08        2.47 o
   5  12   0     1281.01     1309.83       24.39 o
   6  12   0        2.93        5.17        0.34 o
   7  12   0      560.90      643.69       22.60 o
   8  12   0        4.67        5.10        1.07 o
   0  13   0      592.49      538.54       11.96 o
   1  13   0      155.55      141.92        2.45 o
   2  13   0      198.04      196.38        3.32 o
   3  13   0      217.09      219.37        3.81 o
   4  13   0       13.16       13.87        1.31 o
   5  13   0      226.93      228.15        4.83 o
   6  13   0        5.66        6.43        0.80 o
   7  13   0      144.23      156.83        7.17 o
   8  13   0       17.27       19.95        5.82 o
   0  14   0       71.19       58.21        1.61 o
   1  14   0       15.49       16.25        1.08 o
   2  14   0        8.67       10.85        0.56 o
   3  14   0       33.58       33.43        1.29 o
   4  14   0        0.80        0.53        0.06 o
   5  14   0        5.91        5.79        0.64 o
   6  14   0        8.40        9.94        1.97 o
   7  14   0        1.40        1.05        0.31 o
   8  14   0       12.29       11.07        3.81 o
   0  15   0      106.78       73.39        2.54 o
   1  15   0        8.98        6.52        0.53 o
   2  15   0       26.57       27.88        2.77 o
   3  15   0       10.83       10.49        0.91 o
   4  15   0       -0.03        0.08        0.06 <
   5  15   0       15.69       13.98        2.18 o
   6  15   0        6.22        5.83        1.45 o
   7  15   0        7.47       10.67        1.89 o
   8  15   0        4.20        6.22        1.15 o
   0  16   0       79.43       71.72        1.92 o
   1  16   0        1.12        2.42        0.12 o
   2  16   0       19.65       21.36        1.83 o
   3  16   0        5.82        5.99        0.45 o
   4  16   0       -0.41        0.02        0.06 <
   5  16   0       -0.49        0.27        0.06 <
   6  16   0        4.36        5.29        0.93 o
   7  16   0        0.47        1.33        0.11 o
   8  16   0        5.91        6.06        2.60 <
   0  17   0       44.07       38.49        1.36 o
   1  17   0        0.62        0.45        0.06 o
   2  17   0       19.29       19.79        1.94 o
   3  17   0        1.21        1.05        0.12 o
   4  17   0        2.06        1.37        0.20 o
   5  17   0        2.40        1.71        0.26 o
   6  17   0       -1.24        0.08        0.22 <
   7  17   0        0.16        1.60        0.10 <
   0  18   0       67.25       61.06        1.80 o
   1  18   0        0.49        0.27        0.06 o
   2  18   0       24.50       25.04        2.83 o
   3  18   0        0.31        0.81        0.06 o
   4  18   0        1.29        1.56        0.17 o
   5  18   0       -0.62        0.05        0.06 <
   6  18   0        1.87        0.38        0.43 o
   7  18   0        0.00        0.33        0.16 <
   0  19   0       38.68       35.61        1.39 o
   1  19   0        0.13        0.04        0.06 o
   2  19   0       16.96       18.39        1.79 o
   3  19   0        0.23        0.10        0.06 o
   4  19   0        2.89        2.29        0.29 o
   5  19   0       -0.31        0.18        0.06 <
   6  19   0       -1.87        0.39        0.40 <
   7  19   0        0.47        2.02        0.13 <
   0  20   0       51.34       48.14        1.74 o
   1  20   0        0.28        0.10        0.06 o
   2  20   0       21.90       21.05        2.81 o
   3  20   0        1.05        0.30        0.12 o
   4  20   0        1.20        2.68        0.17 o
   5  20   0       -0.10        0.25        0.12 <
   6  20   0       -0.31        0.01        0.07 <
   7  20   0        1.24        0.29        0.29 o
   0  21   0       79.72       82.24        2.68 o
   1  21   0        0.47        0.23        0.06 o
   2  21   0       34.96       34.97        1.43 o
   3  21   0        1.09        1.46        0.12 o
   4  21   0        2.93        3.65        0.35 o
   5  21   0       -0.62        0.31        0.07 <
   6  21   0       -0.83        0.00        0.14 <
   7  21   0       -0.16        0.52        0.11 <
   0  22   0       41.45       34.05        1.84 o
   1  22   0        1.13        1.30        0.12 o
   2  22   0       11.69       13.14        1.26 o
   3  22   0        2.84        2.88        0.25 o
   4  22   0        0.31        0.77        0.10 <
   5  22   0        1.35        1.66        0.26 o
   6  22   0       -0.21        0.35        0.12 <
   0  23   0     1684.62     1775.55       50.62 o
   1  23   0       82.77       76.28        2.19 o
   2  23   0      721.35      781.54       13.86 o
   3  23   0      369.74      334.79        9.39 o
   4  23   0      121.67      146.39        4.98 o
   5  23   0      415.11      386.50       13.81 o
   6  23   0        4.05        1.39        0.84 o
   0  24   0       72.82       32.28        3.18 o
   1  24   0        2.37        1.64        0.20 o
   2  24   0       13.11       12.89        1.71 o
   3  24   0        3.27        4.68        0.38 o
   4  24   0       -0.93        0.47        0.06 <
   5  24   0        1.66        2.22        0.35 o
   6  24   0        3.94        1.06        0.89 o
   0  25   0      157.35      157.01        5.69 o
   1  25   0       27.92       24.93        4.38 o
   2  25   0       83.03       91.43        2.65 o
   3  25   0      113.11      104.71        4.14 o
   4  25   0       38.69       41.11        2.65 o
   5  25   0      114.41      107.33        4.99 o
   6  25   0        2.07        5.23        0.44 o
   0  26   0        8.40        8.91        1.76 o
   1  26   0        1.09        1.84        0.14 o
   2  26   0        2.88        3.10        0.39 o
   3  26   0        7.78        7.80        1.41 o
   4  26   0        0.00        0.17        0.07 <
   5  26   0        4.05        5.62        0.80 o
   0  27   0       43.57       39.00        4.36 o
   1  27   0        6.69        5.42        1.25 o
   2  27   0       23.96       24.44        6.25 o
   3  27   0       26.99       24.90        6.04 o
   4  27   0        9.96        9.59        1.99 o
   5  27   0       17.32       21.11        4.84 o
   0  28   0        9.02        6.41        2.53 o
   1  28   0        1.24        1.37        0.27 o
   2  28   0        4.05        2.81        0.79 o
   3  28   0        5.29        5.83        0.95 o
   4  28   0        0.54        0.02        0.11 o
   5  28   0        3.11        4.23        0.72 o
   0  29   0       20.23       20.96        8.09 <
   1  29   0        0.93        1.45        0.08 o
   2  29   0       11.36       12.73        2.78 o
   3  29   0        7.47        7.27        1.64 o
   4  29   0        3.89        3.17        0.74 o
   0  30   0        9.96        6.35        3.19 o
   1  30   0        1.40        1.18        0.26 o
   2  30   0        2.80        3.25        0.53 o
   3  30   0        1.56        4.84        0.34 o
   4  30   0       -1.24        0.15        0.35 <
   0  31   0       13.07       12.06        4.18 o
   1  31   0        0.47        0.46        0.07 o
   2  31   0        8.56        7.46        2.08 o
   3  31   0        1.24        2.19        0.23 o
   0  32   0       16.49       10.16        6.60 <
   1  32   0        4.67        2.30        1.01 o
   2  32   0       11.36        6.87        3.08 o
   3  32   0        7.62        9.13        1.73 o
   0  33   0        9.34        7.12        3.36 <
   1  33   0       -2.33        0.50        0.36 <
   2  33   0        8.56        3.93        2.18 o
   0  34   0      112.65       87.93        8.09 o
   1  34   0        8.87        7.30        2.17 o
   2   0   1      224.78      235.75        3.16 o
   4   0   1       94.26       93.97        1.81 o
   6   0   1       16.57       17.94        2.57 o
   8   0   1        5.91        3.08        1.24 o
   1   1   1      600.50      600.91        9.28 o
   2   1   1       25.42       19.91        1.28 o
   3   1   1       62.56       62.00        0.87 o
   4   1   1       12.89       15.43        0.84 o
   5   1   1       12.58        8.46        1.01 o
   6   1   1       29.56       29.38        3.06 o
   7   1   1        4.55        4.50        0.54 o
   8   1   1       24.01       25.87        5.07 o
   1   2   1     8343.86     8380.96       95.68 o
   2   2   1      484.81      487.36        4.72 o
   3   2   1      857.11      797.22       10.20 o
   4   2   1      255.65      261.69        3.26 o
   5   2   1      110.92       81.74        1.84 o
   6   2   1       98.91      102.58        1.98 o
   7   2   1       29.72       36.79        4.90 o
   8   2   1       20.49       21.74        4.21 o
   1   3   1     9608.32     9893.79      100.82 o
   2   3   1      430.63      440.52        4.54 o
   3   3   1     1106.31     1044.12       12.17 o
   4   3   1      275.54      272.02        3.79 o
   5   3   1      150.21      120.52        2.39 o
   6   3   1       98.40      105.18        1.99 o
   7   3   1       12.91       15.99        1.84 o
   8   3   1       19.76       20.26        3.93 o
   1   4   1      739.84      772.72        7.49 o
   2   4   1      263.81      254.87        2.83 o
   3   4   1      110.98      106.50        1.45 o
   4   4   1      128.23      121.92        2.03 o
   5   4   1       26.43       21.70        2.91 o
   6   4   1       48.48       46.18        1.43 o
   7   4   1        0.71        0.59        0.09 o
   8   4   1        7.68        6.22        1.39 o
   1   5   1      792.35      825.95        7.37 o
   2   5   1       30.06       33.50        1.66 o
   3   5   1       84.41       88.35        1.14 o
   4   5   1       18.91       17.75        1.52 o
   5   5   1        5.43        5.95        0.45 o
   6   5   1        4.19        4.34        0.34 o
   7   5   1       -1.42        0.26        0.17 <
   8   5   1        0.67        0.82        0.08 o
   1   6   1      195.88      201.21        2.04 o
   2   6   1      217.85      217.99        2.28 o
   3   6   1       18.58       17.77        1.08 o
   4   6   1      101.43      107.57        1.51 o
   5   6   1        1.64        1.96        0.14 o
   6   6   1       47.61       50.22        1.28 o
   7   6   1        3.78        3.31        0.48 o
   8   6   1        9.80        9.98        2.03 o
   1   7   1      294.40      315.67        2.96 o
   2   7   1       21.32       23.16        1.15 o
   3   7   1       23.06       26.82        1.48 o
   4   7   1        8.65        8.77        0.49 o
   5   7   1        1.04        0.80        0.11 o
   6   7   1        1.59        1.54        0.18 o
   7   7   1        1.78        2.52        0.26 o
   8   7   1        3.73        0.99        1.49 <
   1   8   1      104.64      107.29        1.20 o
   2   8   1      508.87      495.53        5.15 o
   3   8   1        4.40        4.45        0.23 o
   4   8   1      284.82      292.64        3.64 o
   5   8   1        6.57        6.14        0.45 o
   6   8   1      213.70      210.96        3.99 o
   7   8   1       11.05        9.91        2.24 o
   8   8   1       84.80       71.91        3.78 o
   1   9   1      162.32      154.30        1.81 o
   2   9   1     1403.49     1400.94       13.98 o
   3   9   1        8.23        9.12        0.40 o
   4   9   1      796.52      838.81        9.36 o
   5   9   1        1.64        2.17        0.14 o
   6   9   1      536.79      573.82       10.80 o
   7   9   1        8.48        6.69        1.73 o
   8   9   1      165.78      171.50        5.93 o
   1  10   1       37.34       45.23        0.55 o
   2  10   1      951.13      928.94        9.91 o
   3  10   1        2.40        2.21        0.17 o
   4  10   1      587.00      610.59        6.98 o
   5  10   1       12.76       14.21        1.04 o
   6  10   1      414.92      439.29        8.47 o
   7  10   1       14.52       14.09        3.61 o
   8  10   1      127.12      131.59        4.96 o
   1  11   1       35.62       34.47        0.62 o
   2  11   1      147.91      135.36        1.71 o
   3  11   1        2.11        1.57        0.16 o
   4  11   1       99.66      100.23        1.59 o
   5  11   1       11.34       12.26        1.01 o
   6  11   1       83.62       87.99        2.58 o
   7  11   1       18.05       14.25        4.78 o
   8  11   1       33.14       33.37        3.70 o
   1  12   1       49.11       51.62        0.68 o
   2  12   1       23.74       21.68        1.50 o
   3  12   1        4.24        4.20        0.23 o
   4  12   1       13.05       13.71        1.02 o
   5  12   1        9.24       10.42        0.79 o
   6  12   1        7.11        6.38        1.02 o
   7  12   1        9.65        8.61        1.98 o
   8  12   1        1.87        1.05        0.35 o
   1  13   1      231.16      238.59        2.41 o
   2  13   1      184.33      185.26        1.98 o
   3  13   1       77.17       75.32        1.30 o
   4  13   1      124.58      129.63        2.01 o
   5  13   1       20.03       19.51        2.18 o
   6  13   1      111.64      112.70        2.90 o
   7  13   1        3.35        3.53        0.57 o
   8  13   1       36.10       33.52        4.14 o
   1  14   1     1362.05     1401.74       12.92 o
   2  14   1      362.49      371.73        3.99 o
   3  14   1      310.71      307.60        4.04 o
   4  14   1      257.29      266.71        3.66 o
   5  14   1       20.67       19.18        2.21 o
   6  14   1      228.37      235.80        5.03 o
   7  14   1       12.21       14.23        2.76 o
   8  14   1       76.97       77.53        4.22 o
   1  15   1      720.57      738.79        6.93 o
   2  15   1      237.77      240.83        2.99 o
   3  15   1      160.90      165.20        2.27 o
   4  15   1      189.97      188.90        2.83 o
   5  15   1        8.66        9.32        0.82 o
   6  15   1      154.17      157.04        4.03 o
   7  15   1       10.19       11.94        2.22 o
   8  15   1       52.75       53.87        4.63 o
   1  16   1       37.39       40.48        0.70 o
   2  16   1        3.59        3.71        0.21 o
   3  16   1        7.34        8.20        0.45 o
   4  16   1        3.97        4.15        0.27 o
   5  16   1        0.00        0.84        0.06 <
   6  16   1        6.46        8.26        1.18 o
   7  16   1        1.04        2.14        0.30 o
   1  17   1       67.92       73.37        1.06 o
   2  17   1       46.50       48.55        0.92 o
   3  17   1       16.87       18.67        1.37 o
   4  17   1       36.83       38.42        1.05 o
   5  17   1        1.40        1.67        0.13 o
   6  17   1       14.39       14.64        3.26 o
   7  17   1        0.00        1.17        0.12 <
   1  18   1       64.32       71.33        1.07 o
   2  18   1        2.59        1.45        0.18 o
   3  18   1       14.39       15.70        1.09 o
   4  18   1        2.90        1.83        0.21 o
   5  18   1        1.09        2.59        0.13 o
   6  18   1        5.29        3.17        1.04 o
   7  18   1        0.10        0.66        0.14 <
   1  19   1       16.24       17.81        1.17 o
   2  19   1       28.75       29.91        2.48 o
   3  19   1        6.43        6.45        0.41 o
   4  19   1       24.43       24.84        3.17 o
   5  19   1        0.44        1.86        0.07 o
   6  19   1        7.05        7.65        1.45 o
   7  19   1       -2.07        0.20        0.39 <
   1  20   1      373.13      397.06        4.59 o
   2  20   1        6.67        6.20        0.41 o
   3  20   1       93.42      102.15        1.60 o
   4  20   1       15.71       14.36        1.96 o
   5  20   1        8.90       12.99        1.43 o
   6  20   1       19.60       18.25        5.56 o
   7  20   1        5.50        6.41        1.37 o
   1  21   1      729.30      764.75        8.62 o
   2  21   1       39.90       40.89        0.99 o
   3  21   1      191.38      215.69        2.97 o
   4  21   1       57.26       55.67        1.79 o
   5  21   1       16.31       22.92        3.01 o
   6  21   1       36.82       35.56        2.85 o
   7  21   1       16.65       15.07        6.88 <
   1  22   1      399.71      413.63        5.28 o
   2  22   1       25.59       24.42        2.70 o
   3  22   1      125.49      142.02        2.65 o
   4  22   1       33.61       31.13        1.67 o
   5  22   1       15.48       22.80        3.26 o
   6  22   1       11.82       12.50        3.10 o
   1  23   1       44.93       41.92        1.14 o
   2  23   1       19.25       19.29        1.99 o
   3  23   1       13.24       14.41        1.66 o
   4  23   1       25.52       25.10        4.73 o
   5  23   1        1.79        3.55        0.39 o
   6  23   1        9.75       10.47        2.28 o
   1  24   1       24.27       22.54        2.85 o
   2  24   1        0.51        0.02        0.06 o
   3  24   1        8.25        8.01        0.97 o
   4  24   1        0.89        0.43        0.07 o
   5  24   1        0.86        0.89        0.11 o
   6  24   1        3.22        3.84        0.73 o
   1  25   1      129.14      139.67        2.96 o
   2  25   1       76.16       69.64        2.18 o
   3  25   1       34.39       37.76        2.26 o
   4  25   1      140.56      122.53        3.72 o
   5  25   1        0.08        2.18        0.12 <
   6  25   1      106.27       97.84        6.82 o
   1  26   1      193.36      209.32        4.27 o
   2  26   1      112.39      107.19        3.30 o
   3  26   1       50.41       59.04        2.09 o
   4  26   1      211.14      186.61        5.46 o
   5  26   1        4.88        6.02        1.12 o
   1  27   1       15.92       17.88        2.71 o
   2  27   1       46.42       37.88        1.99 o
   3  27   1        4.67        6.26        0.65 o
   4  27   1       78.79       67.16        3.08 o
   5  27   1        0.62        2.97        0.17 <
   1  28   1        4.46        4.60        0.54 o
   2  28   1       -0.73        0.03        0.08 <
   3  28   1       -0.99        0.25        0.08 <
   4  28   1        0.08        0.26        0.12 <
   5  28   1       -2.49        0.92        1.00 <
   1  29   1        2.10        1.89        0.26 o
   2  29   1        6.74        6.14        1.10 o
   3  29   1        1.56        0.05        0.30 o
   4  29   1       11.51       10.07        2.74 o
   1  30   1       -0.08        0.70        0.07 <
   2  30   1        1.37        0.37        0.16 o
   3  30   1       -0.70        0.92        0.08 <
   4  30   1        3.42        0.42        1.64 <
   1  31   1        1.32        2.06        0.17 o
   2  31   1        3.97        3.26        0.55 o
   3  31   1        3.66        1.73        0.73 o
   1  32   1       59.23       50.77        3.06 o
   2  32   1       28.63       19.82        9.72 <
   1  33   1      144.49      119.22        5.51 o
   0   0   2      517.49      528.23       20.27 o
   2   0   2      181.73      180.45        3.51 o
   4   0   2       16.84       16.34        2.01 o
   6   0   2       -0.26        1.51        0.07 <
   8   0   2        0.93        0.32        0.20 <
   0   1   2      419.06      370.56       14.19 o
   1   1   2       -0.36        0.30        0.06 <
   2   1   2      104.12       93.96        1.60 o
   3   1   2        0.13        1.26        0.06 o
   4   1   2        6.83        5.22        0.42 o
   5   1   2       -0.43        0.75        0.06 <
   6   1   2        0.29        1.46        0.06 o
   7   1   2       -0.97        1.23        0.08 <
   8   1   2        2.74        4.01        0.52 o
   0   2   2      778.99      677.91       25.81 o
   1   2   2        6.35        7.06        0.33 o
   2   2   2      220.26      200.58        3.15 o
   3   2   2        7.94        8.83        0.40 o
   4   2   2       17.82       16.38        1.55 o
   5   2   2        4.94        4.48        0.40 o
   6   2   2       -0.19        0.19        0.06 <
   7   2   2        2.41        1.50        0.37 o
   8   2   2        1.68        0.44        0.25 o
   0   3   2      436.07      453.43       10.02 o
   1   3   2        5.77        6.45        0.29 o
   2   3   2      101.50       96.23        1.58 o
   3   3   2       14.15       15.47        0.81 o
   4   3   2        9.27        4.56        0.89 o
   5   3   2        9.62       10.39        0.94 o
   6   3   2        4.19        3.67        0.46 o
   7   3   2       13.38       11.55        3.20 o
   8   3   2       11.95       10.78        2.40 o
   0   4   2     3540.81     3492.25       77.61 o
   1   4   2      178.88      181.57        2.93 o
   2   4   2      865.20      801.15       11.04 o
   3   4   2      317.79      319.58        3.95 o
   4   4   2       89.00       65.55        1.62 o
   5   4   2      270.50      250.41        4.26 o
   6   4   2        4.21        5.34        0.42 o
   7   4   2      151.37      148.86        4.36 o
   8   4   2       52.90       61.31        2.62 o
   0   5   2     2635.87     2485.28       54.00 o
   1   5   2      269.15      286.34        4.07 o
   2   5   2      630.89      542.90        8.36 o
   3   5   2      559.46      550.55        6.46 o
   4   5   2      103.64       68.65        1.80 o
   5   5   2      424.65      406.69        6.41 o
   6   5   2       10.30        7.62        1.36 o
   7   5   2      223.58      204.67        6.09 o
   8   5   2       48.17       54.53        2.54 o
   0   6   2      365.01      379.04        7.65 o
   1   6   2      120.22      125.25        1.90 o
   2   6   2      155.69      155.32        2.34 o
   3   6   2      168.85      180.14        2.06 o
   4   6   2       29.36       26.00        2.75 o
   5   6   2      139.64      131.66        2.66 o
   6   6   2       10.27        6.90        1.45 o
   7   6   2       90.24       77.09        3.99 o
   8   6   2        4.23        2.16        0.73 o
   0   7   2     1100.38     1094.17       22.47 o
   1   7   2      679.72      650.01        9.53 o
   2   7   2      489.56      503.74        6.70 o
   3   7   2      986.84      995.01       11.27 o
   4   7   2      102.67      117.75        1.88 o
   5   7   2      717.24      698.50       12.60 o
   6   7   2       12.63       13.64        1.96 o
   7   7   2      340.59      340.82        8.62 o
   8   7   2        8.46        4.95        1.64 o
   0   8   2      900.01      838.32       17.18 o
   1   8   2      378.95      378.89        5.56 o
   2   8   2      355.11      352.07        4.61 o
   3   8   2      654.04      664.23        7.94 o
   4   8   2       85.50       90.43        1.79 o
   5   8   2      463.69      454.57        8.82 o
   6   8   2        9.15       11.58        1.82 o
   7   8   2      195.36      207.60        5.79 o
   8   8   2        2.61        0.74        0.55 o
   0   9   2       83.31       85.85        2.10 o
   1   9   2        6.70        7.67        0.39 o
   2   9   2       36.41       31.83        0.80 o
   3   9   2       14.75       14.61        1.10 o
   4   9   2        4.57        4.29        0.41 o
   5   9   2        6.03        4.78        0.74 o
   6   9   2        0.25        1.15        0.13 <
   7   9   2        7.47        3.77        1.61 o
   8   9   2        1.87        1.02        0.28 o
   0  10   2      141.01      126.21        3.21 o
   1  10   2       47.85       47.24        0.91 o
   2  10   2       36.83       38.37        0.77 o
   3  10   2       98.87       97.45        1.73 o
   4  10   2        4.42        4.42        0.40 o
   5  10   2       53.06       49.21        1.82 o
   6  10   2        1.06        0.94        0.29 o
   7  10   2       15.01       14.89        3.46 o
   8  10   2        0.06        1.68        0.11 <
   0  11   2       75.82       84.86        1.70 o
   1  11   2        7.02        8.30        0.33 o
   2  11   2       35.97       36.70        0.81 o
   3  11   2       13.59       13.87        1.24 o
   4  11   2        7.89        7.46        0.72 o
   5  11   2        5.37        5.14        0.67 o
   6  11   2        1.56        1.02        0.39 o
   7  11   2        3.19        1.82        0.59 o
   8  11   2        1.48        0.21        0.41 o
   0  12   2       45.77       41.47        1.02 o
   1  12   2       16.22       16.75        1.06 o
   2  12   2       12.52       11.23        0.88 o
   3  12   2       37.08       38.15        1.12 o
   4  12   2        0.73        0.13        0.06 o
   5  12   2       16.14       15.44        2.33 o
   6  12   2        0.44        1.93        0.09 o
   7  12   2        2.49        3.35        0.47 o
   8  12   2        2.07        2.12        0.75 <
   0  13   2       94.52      105.81        1.72 o
   1  13   2       12.84       12.79        0.77 o
   2  13   2       49.62       48.21        1.13 o
   3  13   2       21.81       21.53        2.35 o
   4  13   2       15.22       14.50        1.84 o
   5  13   2       12.49       10.63        1.71 o
   6  13   2        2.05        2.14        0.46 o
   7  13   2        3.19        3.28        0.60 o
   8  13   2       -1.56        0.20        0.62 <
   0  14   2       17.43       17.56        1.74 o
   1  14   2       11.75       12.44        0.85 o
   2  14   2        3.47        3.90        0.22 o
   3  14   2       24.56       26.00        2.89 o
   4  14   2        0.42        0.27        0.06 o
   5  14   2       10.27       10.98        1.38 o
   6  14   2        2.96        2.24        0.48 o
   7  14   2        2.41        1.65        0.55 o
   0  15   2      273.22      295.76        5.96 o
   1  15   2       27.50       28.93        2.48 o
   2  15   2      143.04      146.65        2.35 o
   3  15   2       51.11       52.16        1.30 o
   4  15   2       46.91       48.02        1.35 o
   5  15   2       31.43       35.81        2.98 o
   6  15   2        3.35        4.20        0.62 o
   7  15   2        9.02       12.81        2.14 o
   0  16   2      346.24      373.42        8.04 o
   1  16   2       64.04       66.87        1.29 o
   2  16   2      201.06      194.66        3.17 o
   3  16   2      118.80      123.85        2.26 o
   4  16   2       58.61       53.90        1.52 o
   5  16   2       93.20       99.19        3.23 o
   6  16   2        0.62        1.86        0.08 o
   7  16   2       38.35       44.75        2.75 o
   0  17   2      413.74      429.37        8.74 o
   1  17   2       19.87       19.92        1.95 o
   2  17   2      211.29      203.65        3.31 o
   3  17   2       29.72       31.61        3.48 o
   4  17   2       34.62       31.63        1.53 o
   5  17   2       39.62       38.46        2.13 o
   6  17   2        2.49        4.93        0.39 o
   7  17   2       36.10       36.38        2.69 o
   0  18   2     1643.30     1763.10       33.13 o
   1  18   2        4.96        4.34        0.36 o
   2  18   2      754.99      825.31       11.07 o
   3  18   2       10.65        8.68        1.02 o
   4  18   2      148.87      171.59        3.22 o
   5  18   2       10.89       10.40        2.10 o
   6  18   2        1.87        1.81        0.35 o
   7  18   2       10.74       10.52        2.67 o
   0  19   2     1643.65     1785.00       33.13 o
   1  19   2       -0.16        0.07        0.06 <
   2  19   2      771.53      860.30       11.31 o
   3  19   2       -0.05        0.03        0.06 <
   4  19   2      137.72      170.49        3.84 o
   5  19   2        1.06        0.21        0.31 o
   6  19   2       -0.31        0.15        0.13 <
   7  19   2       -3.42        0.80        0.91 <
   0  20   2      325.05      335.31        7.07 o
   1  20   2        0.69        1.20        0.06 o
   2  20   2      151.26      162.70        2.74 o
   3  20   2        2.80        2.68        0.27 o
   4  20   2       28.72       35.97        5.78 o
   5  20   2        1.12        1.86        0.28 o
   6  20   2       -1.24        0.73        0.23 <
   0  21   2       21.16       22.34        3.27 o
   1  21   2        0.16        0.23        0.06 o
   2  21   2        9.86        9.91        0.93 o
   3  21   2        0.54        0.69        0.06 o
   4  21   2        0.57        0.50        0.08 o
   5  21   2        1.12        0.44        0.21 o
   6  21   2       -1.66        0.23        0.29 <
   0  22   2       62.55       63.69        2.03 o
   1  22   2        1.08        1.09        0.12 o
   2  22   2       28.29       29.41        3.67 o
   3  22   2        1.61        3.58        0.28 o
   4  22   2        6.22        3.64        1.16 o
   5  22   2        1.62        2.01        0.29 o
   6  22   2        0.41        0.15        0.11 <
   0  23   2        3.06        3.63        0.35 o
   1  23   2        0.99        0.10        0.06 o
   2  23   2        0.65        1.42        0.07 o
   3  23   2        0.10        0.45        0.06 <
   4  23   2        0.68        0.14        0.11 o
   5  23   2       -1.56        0.59        0.31 <
   6  23   2       -1.56        0.00        0.38 <
   0  24   2       25.64       26.58        5.56 o
   1  24   2       -0.16        0.91        0.06 <
   2  24   2       11.24       11.27        1.60 o
   3  24   2        1.43        3.63        0.28 o
   4  24   2        0.81        0.55        0.10 o
   5  24   2        4.20        2.22        0.92 o
   0  25   2        3.27        3.17        0.56 o
   1  25   2        0.16        0.68        0.08 <
   2  25   2       -0.05        1.31        0.09 <
   3  25   2        4.28        3.07        0.80 o
   4  25   2        0.31        0.73        0.16 <
   5  25   2        5.29        3.78        1.47 o
   0  26   2        8.51       11.40        2.32 o
   1  26   2        1.04        0.97        0.22 o
   2  26   2        2.07        3.83        0.38 o
   3  26   2        5.60        3.60        0.92 o
   4  26   2        1.97        0.34        0.45 o
   5  26   2        0.31        2.30        0.19 <
   0  27   2        2.28        4.66        0.49 o
   1  27   2       10.89       10.61        2.03 o
   2  27   2        0.67        1.37        0.09 o
   3  27   2       59.51       50.84        3.02 o
   4  27   2        1.24        1.48        0.39 o
   5  27   2       82.46       67.55        8.71 o
   0  28   2        8.51       14.69        2.33 o
   1  28   2       27.13       22.63        6.09 o
   2  28   2        4.20        4.97        0.84 o
   3  28   2      120.43      109.86        4.57 o
   4  28   2        0.00        0.86        0.12 <
   0  29   2       34.33       35.48        3.02 o
   1  29   2       13.88       13.07        2.77 o
   2  29   2       19.22       22.01        5.09 o
   3  29   2       69.39       62.50        3.60 o
   4  29   2        2.80       11.47        1.34 <
   0  30   2       34.39       33.35        3.37 o
   1  30   2       38.04       36.60        2.57 o
   2  30   2       23.34       21.12        6.21 o
   3  30   2      198.95      171.94        7.42 o
   0  31   2       23.34       18.17        8.40 <
   1  31   2       30.29       26.39        7.28 o
   2  31   2       13.28       11.20        3.25 o
   0  32   2        4.05        6.24        0.97 o
   1  32   2       -0.10        0.45        0.06 <
   2  32   2       -4.05        3.18        1.62 <
   2   0   3       39.77       45.60        1.94 o
   4   0   3       31.07       25.61        4.38 o
   6   0   3        3.11        4.05        0.76 o
   8   0   3        4.36        0.67        1.49 <
   1   1   3        1.80        2.48        0.15 o
   2   1   3        9.72       10.27        0.87 o
   3   1   3        0.93        0.29        0.06 o
   4   1   3        7.50        6.20        0.78 o
   5   1   3        1.04        0.77        0.18 o
   6   1   3        9.40        9.91        2.19 o
   7   1   3        1.61        2.44        0.44 o
   8   1   3        6.92        5.14        1.55 o
   1   2   3       20.48       21.08        2.18 o
   2   2   3       49.13       45.74        1.68 o
   3   2   3        6.71        5.63        0.69 o
   4   2   3       36.35       31.34        1.50 o
   5   2   3        1.87        0.93        0.31 o
   6   2   3        7.78        6.73        1.62 o
   7   2   3        1.73        0.44        0.43 o
   8   2   3       -1.87        0.04        0.51 <
   1   3   3       46.99       43.27        1.21 o
   2   3   3       29.54       28.40        3.10 o
   3   3   3        9.28        8.06        0.93 o
   4   3   3       25.10       23.36        4.99 o
   5   3   3        0.44        0.86        0.10 o
   6   3   3       42.32       40.05        2.75 o
   7   3   3        8.31        9.01        1.58 o
   8   3   3       19.92       23.53        5.20 o
   1   4   3      746.04      785.49       11.53 o
   2   4   3      271.86      271.53        4.90 o
   3   4   3      190.50      200.64        3.68 o
   4   4   3      198.10      197.87        4.54 o
   5   4   3       22.28       20.10        4.77 o
   6   4   3      175.75      159.58        5.78 o
   7   4   3        6.76        5.58        1.37 o
   8   4   3       49.71       49.08        3.23 o
   1   5   3     1167.55     1222.03       18.52 o
   2   5   3      297.27      303.66        4.62 o
   3   5   3      303.32      300.88        5.45 o
   4   5   3      227.65      218.68        5.51 o
   5   5   3       33.67       31.63        2.93 o
   6   5   3      190.39      162.24        5.38 o
   7   5   3        3.89        5.01        0.76 o
   8   5   3       49.56       42.24        3.13 o
   1   6   3      664.01      610.69       10.30 o
   2   6   3      341.99      371.09        6.72 o
   3   6   3      144.01      123.68        3.29 o
   4   6   3      365.33      373.23        8.28 o
   5   6   3       24.09       21.92        6.30 o
   6   6   3      316.78      316.74        8.17 o
   7   6   3        9.16        8.54        1.87 o
   8   6   3      114.10      111.89        5.29 o
   1   7   3      873.07      778.02       12.43 o
   2   7   3      356.99      377.33        6.99 o
   3   7   3      119.77       88.88        3.10 o
   4   7   3      427.56      411.80        9.56 o
   5   7   3        5.29        3.78        0.90 o
   6   7   3      300.13      299.92        7.79 o
   7   7   3       17.78       19.81        4.09 o
   8   7   3      112.65      100.63        5.94 o
   1   8   3      161.89      117.14        2.94 o
   2   8   3      121.98      120.01        2.83 o
   3   8   3       31.78       21.87        2.52 o
   4   8   3      182.61      158.66        5.14 o
   5   8   3       17.30       16.06        4.00 o
   6   8   3      123.75      125.00        3.97 o
   7   8   3        2.80        4.01        0.54 o
   1   9   3        2.80        4.51        0.19 o
   2   9   3       16.53       14.41        2.37 o
   3   9   3        3.35        1.81        0.36 o
   4   9   3       20.64       20.53        4.51 o
   5   9   3       15.93       11.64        3.60 o
   6   9   3       20.69       20.63        4.51 o
   7   9   3        4.41        5.95        0.96 o
   1  10   3        5.95        5.04        0.56 o
   2  10   3        2.53        2.81        0.29 o
   3  10   3       -0.12        0.66        0.08 <
   4  10   3        4.18        4.08        0.61 o
   5  10   3        3.94        5.25        0.57 o
   6  10   3        1.56        2.20        0.39 o
   7  10   3        4.67        4.58        1.07 o
   1  11   3        6.40        8.94        0.61 o
   2  11   3        8.13        8.12        0.93 o
   3  11   3        1.52        2.13        0.21 o
   4  11   3       11.38       10.72        1.84 o
   5  11   3        6.12        5.64        1.00 o
   6  11   3        8.76        7.04        1.72 o
   7  11   3        1.50        4.20        0.38 o
   1  12   3        7.23        9.34        1.12 o
   2  12   3        0.80        0.61        0.06 o
   3  12   3       -0.09        0.12        0.06 <
   4  12   3       -1.42        0.47        0.17 <
   5  12   3        4.51        2.97        0.76 o
   6  12   3        1.71        0.34        0.30 o
   7  12   3        2.07        2.80        0.57 o
   1  13   3       15.83       20.17        2.34 o
   2  13   3        7.09        6.42        0.75 o
   3  13   3        4.80        5.96        0.65 o
   4  13   3        8.40        8.27        1.17 o
   5  13   3        2.13        2.95        0.38 o
   6  13   3        3.73        4.46        0.62 o
   7  13   3        1.17        0.94        0.37 o
   1  14   3       25.96       31.51        4.42 o
   2  14   3        4.63        3.40        0.58 o
   3  14   3        3.47        3.51        0.45 o
   4  14   3        1.91        3.09        0.26 o
   5  14   3       -0.78        0.87        0.10 <
   6  14   3        1.19        1.75        0.27 o
   7  14   3        1.48        1.55        0.21 o
   1  15   3      119.89      132.80        3.32 o
   2  15   3       15.00       13.34        2.89 o
   3  15   3       30.08       40.03        5.66 o
   4  15   3       22.35       20.90        5.08 o
   5  15   3        4.48        7.80        0.86 o
   6  15   3       14.31       13.65        2.94 o
   7  15   3        2.02        1.21        0.47 o
   1  16   3      914.56     1050.18       21.02 o
   2  16   3       87.69       70.49        3.41 o
   3  16   3      247.95      287.93        7.44 o
   4  16   3       97.71       91.69        3.44 o
   5  16   3       23.96       27.48        6.55 o
   6  16   3       65.71       65.29        2.91 o
   7  16   3       17.97       16.81        5.29 o
   1  17   3      674.45      755.44       17.43 o
   2  17   3       56.76       49.42        2.74 o
   3  17   3      198.66      227.92        6.26 o
   4  17   3       71.52       66.55        2.93 o
   5  17   3       22.40       25.02        5.02 o
   6  17   3       51.03       49.50        3.49 o
   1  18   3      251.25      272.22        7.27 o
   2  18   3        7.97        8.92        1.46 o
   3  18   3       94.66       92.42        3.76 o
   4  18   3        1.37        1.90        0.29 o
   5  18   3       11.51       10.90        2.72 o
   6  18   3        2.02        1.08        0.54 o
   1  19   3      460.24      496.27       12.34 o
   2  19   3       29.67       29.82        5.52 o
   3  19   3      171.65      174.05        5.68 o
   4  19   3       27.13       24.67        5.93 o
   5  19   3       15.37       19.66        3.95 o
   6  19   3        9.65       11.72        3.28 <
   1  20   3      287.78      296.59        8.22 o
   2  20   3        0.83        1.36        0.10 o
   3  20   3       96.90       98.50        3.85 o
   4  20   3        0.06        0.72        0.12 <
   5  20   3        5.17        7.25        1.09 o
   6  20   3        4.98        2.68        2.14 <
   1  21   3        7.78        7.23        1.36 o
   2  21   3        9.13       10.81        1.65 o
   3  21   3        3.49        3.12        0.71 o
   4  21   3       16.80       13.19        4.11 o
   5  21   3        1.56        0.72        0.47 o
   6  21   3       -0.31        3.02        0.41 <
   1  22   3       45.74       45.76        2.56 o
   2  22   3       -0.67        0.85        0.06 <
   3  22   3       15.68       15.81        3.70 o
   4  22   3        0.81        0.88        0.09 o
   5  22   3       -2.59        1.15        0.60 <
   1  23   3        8.90        8.10        1.69 o
   2  23   3        6.95        7.95        1.33 o
   3  23   3        5.29        3.70        1.02 o
   4  23   3       10.83        9.72        2.81 o
   5  23   3        1.45        0.96        0.43 o
   1  24   3       19.04       19.87        4.52 o
   2  24   3        0.93        0.84        0.09 o
   3  24   3       10.02        8.90        2.32 o
   4  24   3        2.88        1.30        0.69 o
   5  24   3        1.56        2.14        0.51 o
   1  25   3       10.27       10.32        2.14 o
   2  25   3        8.66        7.23        1.66 o
   3  25   3        5.23        3.50        1.16 o
   4  25   3       12.55       11.02        4.22 o
   1  26   3       14.25       11.67        3.35 o
   2  26   3        1.35        0.63        0.27 o
   3  26   3        5.13        4.50        1.32 o
   4  26   3        5.29        1.24        1.60 o
   1  27   3       10.77        9.86        2.37 o
   2  27   3       38.59       34.40        2.77 o
   3  27   3        3.84        2.48        1.04 o
   4  27   3       77.59       62.81        5.10 o
   1  28   3       10.74       12.22        2.35 o
   2  28   3      112.54       93.12        6.06 o
   3  28   3        4.67        3.15        1.35 o
   1  29   3        2.26        4.02        0.59 o
   2  29   3       92.32       78.02        5.51 o
   3  29   3        3.42        0.21        1.12 o
   1  30   3        2.90        0.96        0.86 o
   2  30   3       33.81       29.13        4.88 o
   0   0   4      171.15       66.42       11.82 o
   2   0   4       31.22       29.43        3.38 o
   4   0   4        5.08        3.88        1.26 o
   6   0   4       -0.78        0.61        0.15 <
   0   1   4      621.84      689.51       14.60 o
   1   1   4        4.28        3.67        0.45 o
   2   1   4      326.65      315.99        5.98 o
   3   1   4        5.39        5.48        0.61 o
   4   1   4       56.28       53.45        2.36 o
   5   1   4        5.68        7.97        1.45 o
   6   1   4       -1.32        0.94        0.45 <
   7   1   4       11.67        8.92        3.95 o
   0   2   4      925.35     1045.63       21.34 o
   1   2   4       36.66       37.36        1.42 o
   2   2   4      501.31      491.21       10.37 o
   3   2   4       72.27       64.40        2.35 o
   4   2   4       97.61       89.51        3.37 o
   5   2   4       79.79       68.96        3.79 o
   6   2   4        1.94        0.19        0.73 <
   7   2   4       54.53       50.53        4.22 o
   0   3   4      368.33      400.71        8.97 o
   1   3   4       48.16       52.93        1.42 o
   2   3   4      205.11      196.61        5.02 o
   3   3   4       98.15      102.67        3.79 o
   4   3   4       55.83       46.78        2.91 o
   5   3   4       85.89       81.35        3.90 o
   6   3   4        1.01        0.56        0.41 <
   7   3   4       36.25       33.97        4.57 o
   0   4   4       59.64       57.76        2.18 o
   1   4   4        3.26        3.37        0.27 o
   2   4   4       37.88       34.55        2.53 o
   3   4   4        6.97        6.70        1.11 o
   4   4   4       14.63       15.48        3.41 o
   5   4   4        5.60        4.74        1.16 o
   6   4   4        4.11        2.61        0.94 o
   7   4   4        1.09        1.25        0.39 <
   0   5   4        8.92       11.40        1.10 o
   1   5   4        6.15        6.32        0.57 o
   2   5   4        4.49        2.61        0.61 o
   3   5   4       16.98       15.80        3.13 o
   4   5   4        0.87        0.66        0.12 o
   5   5   4        9.46        8.22        2.09 o
   6   5   4        2.30        3.15        0.83 <
   7   5   4        4.36        2.58        1.37 o
   0   6   4       24.46       26.12        4.37 o
   1   6   4        0.65        0.28        0.06 o
   2   6   4       16.98       14.99        2.97 o
   3   6   4        1.64        0.44        0.24 o
   4   6   4        9.65        7.28        2.00 o
   5   6   4        0.06        0.79        0.11 <
   6   6   4        4.28        2.61        1.03 o
   7   6   4        1.12        0.90        0.61 <
   0   7   4        4.59        5.11        0.59 o
   1   7   4        4.08        4.91        0.42 o
   2   7   4        2.04        0.76        0.24 o
   3   7   4       11.31       13.76        2.01 o
   4   7   4        1.14        1.46        0.22 o
   5   7   4        8.65        6.63        1.87 o
   6   7   4        5.48        4.73        1.16 o
   7   7   4        2.12        1.23        0.82 <
   0   8   4       25.83       23.70        7.19 o
   1   8   4        7.59        5.60        1.08 o
   2   8   4        8.36        8.08        1.20 o
   3   8   4       25.10       23.66        5.89 o
   4   8   4        2.96        2.39        0.51 o
   5   8   4       41.82       39.15        3.20 o
   6   8   4        2.24        2.27        0.48 o
   7   8   4       35.72       32.00        3.57 o
   0   9   4       68.15       50.06        3.39 o
   1   9   4       66.01       74.93        2.17 o
   2   9   4       17.48        9.65        3.52 o
   3   9   4      264.81      264.51        6.53 o
   4   9   4        1.09        0.91        0.25 o
   5   9   4      279.56      273.94        8.44 o
   6   9   4        2.93        1.70        0.61 o
   7   9   4      154.42      148.68        6.59 o
   0  10   4      107.25       89.40        4.58 o
   1  10   4       89.26      100.67        3.07 o
   2  10   4       36.47       29.27        3.19 o
   3  10   4      352.83      350.18        8.34 o
   4  10   4        8.71        8.78        1.61 o
   5  10   4      351.82      346.03       10.25 o
   6  10   4        2.86        1.61        0.63 o
   7  10   4      174.11      174.80        7.09 o
   0  11   4       28.32       26.40        6.38 o
   1  11   4       22.20       22.81        4.62 o
   2  11   4        9.96       12.57        1.98 o
   3  11   4      100.60       82.93        3.20 o
   4  11   4        3.27        5.14        0.60 o
   5  11   4       91.30       88.18        3.92 o
   6  11   4        2.61        1.62        0.55 o
   0  12   4       21.16       22.64        6.67 o
   1  12   4        5.03        6.63        0.74 o
   2  12   4        8.04        9.63        1.29 o
   3  12   4       19.92       22.77        4.78 o
   4  12   4        2.59        2.72        0.44 o
   5  12   4       14.87       17.80        3.73 o
   6  12   4        0.75        1.53        0.15 o
   0  13   4      167.88      186.27        8.17 o
   1  13   4       31.01       30.48        5.09 o
   2  13   4       80.39       93.56        3.02 o
   3  13   4      122.17      117.05        4.49 o
   4  13   4       28.47       31.52        6.65 o
   5  13   4      123.35      115.92        4.71 o
   6  13   4        0.68        2.24        0.18 <
   0  14   4      287.12      345.00       10.56 o
   1  14   4       33.97       31.16        2.69 o
   2  14   4      126.03      157.94        4.03 o
   3  14   4      139.22      127.21        4.93 o
   4  14   4       27.38       32.53        7.36 o
   5  14   4      143.70      135.48        5.19 o
   6  14   4        5.68        5.08        1.44 o
   0  15   4      168.76      196.97        6.90 o
   1  15   4        8.87        7.04        1.50 o
   2  15   4       63.48       81.37        2.68 o
   3  15   4       40.14       37.09        2.54 o
   4  15   4        7.78        8.35        1.64 o
   5  15   4       51.89       54.66        3.59 o
   6  15   4        7.08        4.32        1.82 o
   0  16   4       12.24       15.87        3.07 o
   1  16   4       -0.26        0.90        0.07 <
   2  16   4        6.53        6.16        1.07 o
   3  16   4        3.24        3.15        0.59 o
   4  16   4        0.62        0.42        0.12 o
   5  16   4        4.42        3.54        1.00 o
   6  16   4        4.67        2.50        1.67 <
   0  17   4       17.11       22.62        4.87 o
   1  17   4        1.35        0.14        0.21 o
   2  17   4        9.28        9.36        1.69 o
   3  17   4        3.67        1.15        0.72 o
   4  17   4        2.12        0.48        0.43 o
   5  17   4        2.33        2.20        0.57 o
   6  17   4       -1.35        1.15        0.38 <
   0  18   4       17.22       22.03        4.93 o
   1  18   4       -0.05        0.82        0.08 <
   2  18   4       11.57       10.08        2.33 o
   3  18   4        3.30        2.19        0.68 o
   4  18   4        1.18        0.91        0.38 o
   5  18   4        2.33        2.30        0.58 o
   0  19   4       14.42       14.60        4.28 o
   1  19   4        0.31        0.02        0.14 <
   2  19   4        7.05        7.29        1.20 o
   3  19   4        0.12        0.03        0.14 <
   4  19   4        0.44        1.03        0.13 <
   5  19   4        1.87        0.23        0.50 o
   0  20   4      113.89      124.43        5.53 o
   1  20   4       -1.66        0.50        0.26 <
   2  20   4       69.29       70.80        3.00 o
   3  20   4       -1.12        0.59        0.30 <
   4  20   4       16.80       15.80        5.11 o
   5  20   4       -1.40        0.74        0.42 <
   0  21   4      474.13      522.44       16.84 o
   1  21   4       -0.93        0.55        0.11 <
   2  21   4      281.51      305.25        7.74 o
   3  21   4        7.28        9.04        1.68 o
   4  21   4       63.17       72.71        3.91 o
   5  21   4        9.02       10.87        2.68 o
   0  22   4      336.80      361.46       12.65 o
   1  22   4        3.37        2.41        0.63 o
   2  22   4      199.83      206.72        5.96 o
   3  22   4       17.04       18.41        5.04 o
   4  22   4       41.78       44.13        3.36 o
   0  23   4       11.41       15.46        3.56 o
   1  23   4        0.88        0.04        0.14 o
   2  23   4        8.40        9.33        1.71 o
   3  23   4        0.23        0.24        0.12 <
   4  23   4        3.19        2.77        0.90 o
   0  24   4       37.03       38.82        3.44 o
   1  24   4        0.73        1.16        0.12 o
   2  24   4       22.34       20.43        6.36 o
   3  24   4        9.34        6.16        2.53 o
   4  24   4        0.62        2.04        0.22 <
   0  25   4       31.12       27.99        5.82 o
   1  25   4        8.90       10.85        2.01 o
   2  25   4       17.43       15.12        4.60 o
   3  25   4       58.42       49.87        3.99 o
   0  26   4       57.10       43.70        5.20 o
   1  26   4       31.30       26.19        3.86 o
   2  26   4       30.18       29.97       10.45 <
   3  26   4      126.73      122.32        5.73 o
   0  27   4       35.63       33.50        4.20 o
   1  27   4       11.89        7.69        2.91 o
   2  27   4       29.72       26.15        9.64 o
   0  28   4        1.71        1.52        0.49 o
   1  28   4        0.12        0.65        0.15 <
   2   0   5       49.48       51.60        2.75 o
   4   0   5       38.90       32.46        4.18 o
   6   0   5       17.58       19.77        8.95 <
   1   1   5     1200.74     1320.80       22.63 o
   2   1   5        6.80        7.50        1.06 o
   3   1   5      441.72      461.04       13.63 o
   4   1   5        6.77        7.36        1.61 o
   5   1   5       47.92       51.02        3.58 o
   6   1   5        1.71        1.47        0.61 <
   1   2   5       14.63       16.58        4.96 <
   2   2   5        8.61        7.56        1.51 o
   3   2   5        5.91        5.05        1.46 o
   4   2   5        9.10        9.30        2.38 o
   5   2   5        2.57        0.48        0.73 o
   6   2   5        1.87        2.23        0.54 o
   1   3   5       98.84      116.59        2.81 o
   2   3   5        2.55        2.87        0.48 o
   3   3   5       41.08       36.04        2.66 o
   4   3   5        4.67        3.03        1.30 o
   5   3   5        2.88        2.81        0.74 o
   6   3   5        1.48        1.51        0.55 <
   1   4   5        8.51        7.58        1.35 o
   2   4   5        4.82        4.68        0.76 o
   3   4   5        3.73        2.75        0.67 o
   4   4   5        5.60        5.74        1.64 o
   5   4   5        1.79        0.46        0.45 o
   6   4   5        2.33        2.14        0.79 o
   1   5   5       30.43       31.04        6.01 o
   2   5   5        1.71        0.95        0.31 o
   3   5   5        8.25        8.90        1.57 o
   4   5   5        0.93        0.98        0.13 o
   5   5   5        0.62        0.60        0.21 <
   6   5   5        2.65        0.68        0.71 o
   1   6   5        3.55        3.73        0.55 o
   2   6   5        2.43        3.43        0.45 o
   3   6   5        2.70        1.75        0.50 o
   4   6   5        5.10        4.78        1.11 o
   5   6   5        3.27        0.53        1.12 <
   6   6   5        5.91        2.65        1.71 o
   1   7   5       14.31       12.60        2.94 o
   2   7   5        1.68        1.71        0.31 o
   3   7   5        2.54        2.68        0.43 o
   4   7   5        3.53        2.06        0.68 o
   5   7   5       -1.09        0.18        0.32 <
   6   7   5        2.41        0.81        0.69 o
   1   8   5        2.80        1.83        0.39 o
   2   8   5        8.65        9.69        1.73 o
   3   8   5       -0.25        1.46        0.09 <
   4   8   5       17.01       15.10        4.05 o
   5   8   5        2.68        1.99        0.58 o
   6   8   5        7.68       12.12        2.82 <
   1   9   5        6.85        7.36        1.10 o
   2   9   5        5.73        6.93        1.13 o
   3   9   5        1.43        1.02        0.25 o
   4   9   5       10.14        9.34        2.40 o
   5   9   5        1.12        0.93        0.33 o
   6   9   5        6.38        4.94        1.78 o
   1  10   5        0.93        3.47        0.10 o
   2  10   5       22.97       26.18        6.20 o
   3  10   5        8.71        6.70        1.93 o
   4  10   5       51.41       48.21        3.07 o
   5  10   5        6.35        9.49        1.51 o
   1  11   5       58.56       76.18        2.77 o
   2  11   5      135.43      150.16        4.88 o
   3  11   5       30.81       31.74        7.83 o
   4  11   5      262.32      260.00        8.16 o
   5  11   5       10.89       12.07        3.24 o
   1  12   5      121.67      171.46        3.98 o
   2  12   5      183.35      194.91        6.05 o
   3  12   5       34.91       45.43        3.63 o
   4  12   5      356.92      339.44       10.53 o
   5  12   5       -0.93        0.54        0.12 <
   1  13   5       50.31       49.88        2.47 o
   2  13   5       83.21       84.22        3.63 o
   3  13   5       12.01       12.25        2.78 o
   4  13   5      157.83      152.06        5.72 o
   5  13   5        0.00        0.45        0.20 <
   1  14   5       12.60       11.62        2.71 o
   2  14   5        5.17        3.91        1.00 o
   3  14   5        2.99        3.38        0.64 o
   4  14   5        7.08        5.51        2.01 o
   5  14   5        2.07        0.10        0.53 o
   1  15   5        7.99        9.21        1.42 o
   2  15   5       12.45       14.07        3.01 o
   3  15   5        3.17        3.25        0.62 o
   4  15   5       22.02       21.63        7.28 o
   5  15   5       -2.18        0.42        0.63 <
   1  16   5        8.51        7.97        1.66 o
   2  16   5        1.56        1.41        0.36 o
   3  16   5        3.86        3.55        0.85 o
   4  16   5        3.73        2.16        0.89 o
   1  17   5        1.50        2.04        0.28 o
   2  17   5        4.11        5.07        0.87 o
   3  17   5        1.74        1.60        0.42 o
   4  17   5        4.59        6.54        1.14 o
   1  18   5        8.30        8.02        1.58 o
   2  18   5        2.12        1.50        0.50 o
   3  18   5        5.91        3.65        1.60 o
   4  18   5        0.54        2.56        0.22 <
   1  19   5        2.02        1.78        0.33 o
   2  19   5        2.41        3.34        0.65 o
   3  19   5        1.79        0.78        0.63 <
   4  19   5        3.27        3.75        0.88 o
   1  20   5       18.55       19.55        4.67 o
   2  20   5        3.35        1.84        0.73 o
   3  20   5        5.76        6.35        1.51 o
   1  21   5       -0.12        0.46        0.12 <
   2  21   5        3.66        3.13        0.93 o
   3  21   5        0.08        0.13        0.11 <
   1  22   5       94.10       94.40        4.10 o
   2  22   5       14.70       13.57        4.68 o
   1  23   5        3.42        1.03        0.79 o
   2  23   5       12.14       11.40        3.84 o
   1  24   5      438.20      441.51       12.66 o
   2   0   6       16.65       10.71        5.93 <
   4   0   6        0.78        1.11        0.15 <
   1   1   6        0.78        0.08        0.19 <
   2   1   6       93.67       74.26        3.94 o
   3   1   6        1.01        0.66        0.23 o
   4   1   6       18.90       16.39        6.47 <
   0   2   6      402.82      411.73       18.38 o
   1   2   6       -2.02        0.39        0.53 <
   2   2   6      233.85      237.40        7.77 o
   3   2   6        5.76        7.83        1.63 o
   4   2   6       56.87       51.11        3.83 o
   0   3   6      368.28      347.94       17.06 o
   1   3   6        2.90        1.11        0.65 o
   2   3   6      212.74      203.18        8.59 o
   3   3   6       11.12       11.88        3.00 o
   4   3   6       55.55       47.89        3.83 o
   0   4   6      129.45       74.91        7.70 o
   1   4   6        0.25        0.65        0.11 <
   2   4   6       80.44       44.24        6.06 o
   3   4   6        5.19        3.91        1.40 o
   4   4   6       11.12       11.86        3.30 o
   0   5   6        4.77        3.01        1.23 o
   1   5   6        1.37        0.22        0.38 o
   2   5   6        3.42        0.89        1.05 o
   3   5   6        2.70        0.71        0.78 o
   4   5   6       -0.78        0.82        0.25 <
   0   6   6       12.97       14.62        3.65 o
   1   6   6        0.31        1.33        0.09 o
   2   6   6       10.42        9.44        2.63 o
   3   6   6        4.67        5.82        1.46 o
   4   6   6        5.60        4.21        2.10 <
   0   7   6        1.66        0.47        0.47 o
   1   7   6        2.05        0.85        0.41 o
   2   7   6       -0.47        0.43        0.17 <
   3   7   6        3.42        3.24        0.83 o
   4   7   6        2.49        1.56        0.94 <
   0   8   6        7.68       11.77        1.94 o
   1   8   6        9.39       10.83        1.81 o
   2   8   6        6.69        7.36        1.55 o
   3   8   6       47.86       50.84        3.14 o
   4   8   6        3.73        4.43        1.47 <
   0   9   6        7.16        9.14        1.79 o
   1   9   6       39.27       35.36        2.53 o
   2   9   6        1.63        3.06        0.38 o
   3   9   6      175.44      170.41        6.11 o
   4   9   6       -3.84        0.14        1.01 <
   0  10   6        0.83        5.61        0.15 o
   1  10   6       24.33       20.71        5.64 o
   2  10   6        2.26        3.57        0.62 o
   3  10   6      109.29      101.96        4.59 o
   4  10   6        2.49        1.45        0.88 <
   0  11   6        6.64        6.06        1.81 o
   1  11   6        2.74        1.30        0.55 o
   2  11   6        5.45        3.59        1.38 o
   3  11   6        5.19        6.49        1.62 o
   0  12   6        3.01        3.69        0.81 o
   1  12   6        1.12        1.16        0.28 o
   2  12   6        0.78        1.99        0.18 <
   3  12   6        7.70        4.73        2.19 o
   0  13   6       45.54       46.44        3.70 o
   1  13   6        5.41        6.44        1.08 o
   2  13   6       33.53       37.27        3.89 o
   3  13   6       32.67       29.17        3.07 o
   0  14   6       60.99       68.99        4.23 o
   1  14   6       15.75       18.99        4.07 o
   2  14   6       54.07       56.78        3.76 o
   3  14   6       84.80       85.44        4.57 o
   0  15   6       38.38       55.62        3.55 o
   1  15   6        6.04        9.32        1.29 o
   2  15   6       34.46       38.33        4.58 o
   0  16   6       24.06       22.19        9.90 <
   1  16   6       -1.99        0.18        0.33 <
   2  16   6       13.46       12.99        4.43 o
   0  17   6        0.10        1.28        0.24 <
   1  17   6       -1.12        0.26        0.26 <
   2  17   6        0.23        0.53        0.14 <
   0  18   6       25.52       25.53       10.87 <
   1  18   6       -0.81        0.11        0.14 <
   1   5   7      121.05      148.64        7.47 o
