# Supplementary material for: Competition between hydrogen bonding and dispersion interactions in the crystal structures of the primary amines
Source: Royal Society of Chemistry journal article supplement (doi:10.1039/c3ce42639d), 2014-01-01
Supplement: c3ce42639d4.fcf [file c3ce42639d4.fcf]

data_ethylamine_phase1 
#  Ethylamine in P2(1)/c at 180K                      
_audit_creation_date        "11-02-08"
_audit_creation_method      CRYSTALS 

_cell_length_a                    8.2633(3)
_cell_angle_alpha                 90
_cell_length_b                    7.3098(3)
_cell_angle_beta                  99.088(3)
_cell_length_c                    5.5317(2)
_cell_angle_gamma                 90

# NOTE FO on scale of Fc,      1.32599
# Status flags: 
#    o - used in refinement 
#    < - excluded by I/sigmaI cutoff 
#    x - excluded for another reason  

loop_
_refln_index_h
_refln_index_k
_refln_index_l
_refln_F_squared_meas
_refln_F_squared_calc
_refln_F_squared_sigma
_refln_observed_status
   1   0   0      206.83      209.97        3.53 o
   2   0   0      657.85      649.91       11.16 o
   3   0   0      330.51      312.73        5.61 o
   4   0   0       30.03       29.67        0.56 o
   5   0   0      318.96      290.80        5.44 o
   6   0   0       87.48       82.31        1.56 o
   7   0   0        0.11        0.01        0.04 o
   8   0   0        0.57        0.51        0.13 o
   9   0   0        0.16        0.03        0.10 o
  10   0   0        0.86        1.33        0.33 o
   1   1   0       97.59       97.53        1.18 o
   2   1   0      377.08      367.57        4.51 o
   3   1   0      150.03      137.50        1.81 o
   4   1   0       57.95       48.98        0.73 o
   5   1   0       20.98       21.87        0.32 o
   6   1   0       -0.03        0.14        0.02 o
   7   1   0       18.59       19.14        0.34 o
   8   1   0        6.65        6.46        0.24 o
   9   1   0       -0.17        0.02        0.05 o
  10   1   0        1.77        1.34        0.36 o
   0   2   0      561.87      533.05        9.51 o
   1   2   0       45.60       40.57        0.57 o
   2   2   0      299.76      287.66        3.60 o
   3   2   0       85.48       81.74        1.06 o
   4   2   0       76.19       66.25        0.96 o
   5   2   0       14.03       13.39        0.24 o
   6   2   0        0.26        0.22        0.04 o
   7   2   0        8.80        8.02        0.24 o
   8   2   0        0.11        0.14        0.06 o
   9   2   0        0.45        0.19        0.11 o
   1   3   0       22.09       20.62        0.30 o
   2   3   0      177.50      175.33        2.16 o
   3   3   0        1.09        1.09        0.15 o
   4   3   0        0.94        0.98        0.08 o
   5   3   0       43.46       47.03        0.62 o
   6   3   0        3.24        2.91        0.14 o
   7   3   0       36.84       38.81        0.67 o
   8   3   0        1.75        2.08        0.48 o
   9   3   0        4.56        4.32        0.24 o
   0   4   0      134.92      137.45        2.35 o
   1   4   0       55.04       53.59        0.71 o
   2   4   0       10.26        9.62        0.19 o
   3   4   0        1.44        0.89        0.27 o
   4   4   0       15.35       13.13        0.26 o
   5   4   0       20.43       21.98        0.37 o
   6   4   0       16.65       16.58        0.36 o
   7   4   0        3.17        3.20        0.17 o
   8   4   0        0.18        0.26        0.06 o
   9   4   0        0.03        0.20        0.07 o
   1   5   0        4.84        5.13        0.13 o
   2   5   0        5.71        5.80        0.15 o
   3   5   0       56.50       56.03        0.75 o
   4   5   0       35.04       34.11        0.58 o
   5   5   0        7.38        7.62        0.21 o
   6   5   0        2.48        2.31        0.16 o
   7   5   0        3.42        3.25        0.19 o
   8   5   0        4.04        3.87        0.21 o
   0   6   0       15.02       15.78        0.44 o
   1   6   0        5.87        6.03        0.19 o
   2   6   0       28.41       28.92        0.49 o
   3   6   0        4.66        4.95        0.18 o
   4   6   0       11.55       11.54        0.34 o
   5   6   0        1.47        1.27        0.50 o
   6   6   0        0.10        0.05        0.06 o
   7   6   0        3.36        2.74        0.26 o
   1   7   0        0.15        0.00        0.05 o
   2   7   0        1.15        1.08        0.32 o
   3   7   0        2.27        2.31        0.19 o
   4   7   0        0.06        0.21        0.08 o
   5   7   0        0.19        0.33        0.08 o
   6   7   0       -0.05        0.02        0.05 o
   0   8   0        4.21        4.00        0.28 o
   1   8   0        5.36        5.03        0.22 o
   2   8   0       16.16       15.52        0.46 o
   3   8   0        3.19        3.37        0.23 o
   4   8   0        7.62        7.47        0.36 o
   1   9   0        0.69        0.45        0.16 o
 -10   1   1        0.17        0.22        0.07 o
  -9   1   1        1.50        1.71        0.39 o
  -8   1   1        9.37       11.21        0.23 o
  -7   1   1        1.73        1.84        0.39 o
  -6   1   1       -0.04        0.13        0.04 o
  -5   1   1       34.54       31.09        0.54 o
  -4   1   1      127.99      119.68        1.66 o
  -3   1   1        7.02        6.48        0.13 o
  -2   1   1       12.44       13.88        0.18 o
  -1   1   1      949.97     1029.84       12.28 o
   0   1   1       41.11       42.23        0.51 o
   1   1   1     1696.10     1714.16       23.81 o
   2   1   1        1.22        1.01        0.14 o
   3   1   1       19.65       21.67        0.27 o
   4   1   1      260.15      248.52        3.14 o
   5   1   1       37.39       34.98        0.50 o
   6   1   1       67.11       67.75        1.01 o
   7   1   1        6.97        7.11        0.24 o
   8   1   1        2.74        2.61        0.25 o
   9   1   1        2.33        2.27        0.26 o
 -10   2   1        0.71        0.46        0.14 o
  -9   2   1       -0.03        0.00        0.04 o
  -8   2   1        3.95        4.14        0.16 o
  -7   2   1       28.15       28.21        0.48 o
  -6   2   1      118.94      119.99        1.58 o
  -5   2   1        3.47        3.11        0.14 o
  -4   2   1        7.17        8.60        0.20 o
  -3   2   1       77.61       73.74        1.02 o
  -2   2   1       36.53       37.82        0.47 o
  -1   2   1     1381.85     1397.92       16.57 o
   0   2   1      290.07      296.26        3.72 o
   1   2   1       19.59       22.12        0.28 o
   2   2   1       50.63       53.22        0.64 o
   3   2   1        0.40        0.15        0.03 o
   4   2   1       48.54       44.60        0.67 o
   5   2   1       42.74       40.49        0.67 o
   6   2   1       31.42       32.77        0.57 o
   7   2   1        4.20        4.32        0.18 o
   8   2   1        3.67        4.56        0.21 o
   9   2   1        0.21        0.28        0.10 o
  -9   3   1        5.00        4.59        0.24 o
  -8   3   1        2.15        2.21        0.17 o
  -7   3   1        2.28        1.97        0.12 o
  -6   3   1        0.32        0.44        0.05 o
  -5   3   1        8.14        9.56        0.19 o
  -4   3   1       42.69       47.35        0.60 o
  -3   3   1       86.14       86.75        1.07 o
  -2   3   1       62.17       63.65        0.78 o
  -1   3   1       10.89       11.83        0.18 o
   0   3   1        1.96        1.39        0.09 o
   1   3   1       16.96       16.25        0.25 o
   2   3   1      134.03      121.93        1.65 o
   3   3   1      127.97      114.97        1.58 o
   4   3   1        0.04        0.11        0.03 o
   5   3   1        0.61        0.24        0.09 o
   6   3   1        0.83        0.76        0.12 o
   7   3   1        5.29        5.20        0.20 o
   8   3   1        8.47        8.42        0.29 o
   9   3   1        1.42        0.84        0.62 o
  -9   4   1        0.00        0.13        0.08 o
  -8   4   1       17.02       17.43        0.43 o
  -7   4   1        0.35        0.27        0.07 o
  -6   4   1       22.10       22.85        0.37 o
  -5   4   1       42.00       41.11        0.61 o
  -4   4   1       59.19       62.39        0.82 o
  -3   4   1       74.18       72.43        0.94 o
  -2   4   1       20.48       17.30        0.30 o
  -1   4   1       70.79       70.09        0.90 o
   0   4   1        5.92        5.93        0.14 o
   1   4   1       40.02       37.91        0.54 o
   2   4   1        0.06        0.01        0.02 o
   3   4   1        1.02        0.92        0.20 o
   4   4   1        5.45        5.28        0.19 o
   5   4   1        2.86        2.26        0.15 o
   6   4   1        1.38        1.91        0.41 o
   7   4   1        0.59        0.44        0.10 o
   8   4   1        5.11        5.37        0.22 o
  -8   5   1        0.74        1.05        0.15 o
  -7   5   1        0.15        0.16        0.06 o
  -6   5   1        0.06        0.07        0.05 o
  -5   5   1        2.20        2.48        0.13 o
  -4   5   1        6.46        7.79        0.20 o
  -3   5   1        0.64        0.50        0.09 o
  -2   5   1        0.60        0.28        0.07 o
  -1   5   1       15.56       17.53        0.28 o
   0   5   1        1.91        1.82        0.14 o
   1   5   1       48.63       51.85        0.70 o
   2   5   1        0.74        0.68        0.09 o
   3   5   1        1.65        1.84        0.44 o
   4   5   1        8.49        9.67        0.26 o
   5   5   1        2.91        3.11        0.18 o
   6   5   1        7.36        8.19        0.27 o
   7   5   1        2.33        2.57        0.19 o
   8   5   1        0.20        0.19        0.07 o
  -7   6   1        2.32        2.46        0.20 o
  -6   6   1       -0.10        0.01        0.04 o
  -5   6   1       12.51       11.99        0.33 o
  -4   6   1       13.98       14.16        0.31 o
  -3   6   1       10.06        9.28        0.25 o
  -2   6   1       16.18       16.20        0.31 o
  -1   6   1        0.92        0.92        0.16 o
   0   6   1       11.04       10.25        0.25 o
   1   6   1       21.08       19.88        0.37 o
   2   6   1       -0.10        0.02        0.04 o
   3   6   1        5.11        5.33        0.21 o
   4   6   1        8.18        8.63        0.28 o
   5   6   1        4.51        5.22        0.22 o
   6   6   1        0.61        0.58        0.13 o
   7   6   1        1.41        1.29        0.50 o
  -6   7   1       -0.05        0.03        0.04 o
  -5   7   1       -0.02        0.21        0.08 o
  -4   7   1        1.48        1.43        0.59 o
  -3   7   1       21.57       21.39        0.47 o
  -2   7   1        7.42        7.78        0.26 o
  -1   7   1        9.55       10.07        0.25 o
   0   7   1        0.06        0.08        0.05 o
   1   7   1        7.09        6.46        0.25 o
   2   7   1       22.22       21.86        0.49 o
   3   7   1       32.67       32.06        0.73 o
   4   7   1        2.76        2.95        0.24 o
   5   7   1        2.70        2.57        0.25 o
   6   7   1        2.95        2.95        0.27 o
  -4   8   1        0.22        0.14        0.11 o
  -3   8   1        1.03        0.92        0.39 o
  -2   8   1        0.18        0.23        0.07 o
  -1   8   1        0.14        0.10        0.06 o
   0   8   1        1.22        1.46        0.43 o
   1   8   1        0.67        0.79        0.13 o
   2   8   1       -0.04        0.02        0.07 o
   3   8   1        0.15        0.01        0.08 o
   4   8   1       -0.08        0.19        0.08 o
  -1   9   1        2.30        2.41        0.23 o
   0   9   1       -0.18        0.04        0.08 o
 -10   0   2       -0.09        0.00        0.05 o
  -9   0   2        7.83        8.17        0.34 o
  -8   0   2        7.99        8.51        0.32 o
  -7   0   2       63.68       66.61        1.68 o
  -6   0   2       14.99       13.56        0.43 o
  -5   0   2        3.14        2.90        0.19 o
  -4   0   2       13.64       13.85        0.31 o
  -3   0   2       23.51       24.24        0.47 o
  -2   0   2      181.33      172.97        3.12 o
  -1   0   2      307.02      319.00        5.22 o
   0   0   2      775.70      768.66       15.38 o
   1   0   2       19.10       20.43        0.37 o
   2   0   2       53.11       46.49        0.95 o
   3   0   2        8.79        7.42        0.22 o
   4   0   2        5.26        4.56        0.21 o
   5   0   2      138.11      140.12        3.58 o
   6   0   2       18.91       19.52        0.65 o
   7   0   2       17.56       17.95        0.64 o
   8   0   2        0.05        0.01        0.06 o
   9   0   2        2.58        1.87        0.39 o
 -10   1   2        1.93        1.86        0.21 o
  -9   1   2        1.08        0.99        0.30 o
  -8   1   2        4.52        4.44        0.18 o
  -7   1   2        8.31        7.40        0.23 o
  -6   1   2        7.90        7.57        0.21 o
  -5   1   2       51.18       52.13        0.78 o
  -4   1   2        8.45        9.40        0.17 o
  -3   1   2       21.37       24.08        0.31 o
  -2   1   2      348.52      353.68        4.19 o
  -1   1   2        2.82        3.88        0.10 o
   0   1   2      343.98      309.06        4.13 o
   1   1   2       24.68       21.21        0.43 o
   2   1   2       10.71        8.76        0.20 o
   3   1   2       86.39       84.75        1.15 o
   4   1   2       20.61       21.65        0.36 o
   5   1   2        2.89        3.21        0.14 o
   6   1   2        4.80        4.73        0.22 o
   7   1   2        3.39        3.89        0.22 o
   8   1   2        1.88        1.95        0.23 o
   9   1   2        0.25        0.20        0.11 o
  -9   2   2        4.12        4.53        0.19 o
  -8   2   2        0.16        0.03        0.05 o
  -7   2   2        4.88        5.44        0.19 o
  -6   2   2        5.80        5.93        0.17 o
  -5   2   2       17.89       19.57        0.30 o
  -4   2   2        2.25        2.51        0.12 o
  -3   2   2        1.14        0.59        0.17 o
  -2   2   2        9.46        8.39        0.17 o
  -1   2   2        0.08        0.10        0.02 o
   0   2   2        3.95        3.78        0.10 o
   1   2   2        6.99        7.90        0.14 o
   2   2   2       22.92       20.98        0.38 o
   3   2   2       26.69       24.25        0.44 o
   4   2   2       13.37       11.83        0.27 o
   5   2   2       17.14       16.19        0.37 o
   6   2   2       -0.05        0.03        0.04 o
   7   2   2       12.47       11.89        0.42 o
   8   2   2        0.34        0.26        0.10 o
   9   2   2        2.83        2.68        0.29 o
  -9   3   2        0.37        0.39        0.08 o
  -8   3   2        2.26        2.36        0.19 o
  -7   3   2       16.73       17.55        0.34 o
  -6   3   2       16.52       17.91        0.30 o
  -5   3   2       66.41       71.46        0.92 o
  -4   3   2       13.21       12.79        0.25 o
  -3   3   2        1.53        1.48        0.28 o
  -2   3   2      290.30      284.37        3.74 o
  -1   3   2        0.06        0.05        0.02 o
   0   3   2      335.22      328.50        4.32 o
   1   3   2        3.13        2.76        0.11 o
   2   3   2        4.60        4.26        0.15 o
   3   3   2       47.42       50.09        0.76 o
   4   3   2       16.85       17.92        0.35 o
   5   3   2        7.23        6.36        0.25 o
   6   3   2        4.46        4.74        0.21 o
   7   3   2        1.18        1.57        0.39 o
   8   3   2       -0.01        0.31        0.09 o
  -9   4   2        0.13        0.03        0.10 o
  -8   4   2        4.26        4.46        0.24 o
  -7   4   2        8.12        7.21        0.24 o
  -6   4   2       10.17       10.55        0.25 o
  -5   4   2       11.77       12.14        0.27 o
  -4   4   2        0.46        0.22        0.07 o
  -3   4   2       10.15       11.84        0.24 o
  -2   4   2       21.19       21.81        0.35 o
  -1   4   2       42.97       44.09        0.62 o
   0   4   2       74.32       80.06        1.10 o
   1   4   2        5.68        5.10        0.20 o
   2   4   2        5.65        5.83        0.22 o
   3   4   2        8.84        7.43        0.27 o
   4   4   2       10.82       10.92        0.31 o
   5   4   2       13.59       15.61        0.36 o
   6   4   2        6.73        6.89        0.26 o
   7   4   2        0.05        0.00        0.07 o
   8   4   2        0.24        0.63        0.09 o
  -8   5   2        1.30        1.06        0.54 o
  -7   5   2        3.64        3.59        0.20 o
  -6   5   2        0.83        0.92        0.12 o
  -5   5   2        1.33        1.38        0.37 o
  -4   5   2       62.85       65.48        0.96 o
  -3   5   2       44.50       45.95        0.71 o
  -2   5   2       13.08       14.15        0.27 o
  -1   5   2        0.05        0.03        0.04 o
   0   5   2       17.79       17.71        0.36 o
   1   5   2       28.51       28.47        0.52 o
   2   5   2       66.25       65.71        1.15 o
   3   5   2        0.69        0.65        0.14 o
   4   5   2        0.59        0.49        0.10 o
   5   5   2        0.55        0.27        0.11 o
   6   5   2        0.51        0.48        0.12 o
   7   5   2        2.58        2.31        0.24 o
  -7   6   2        0.59        0.67        0.13 o
  -6   6   2        2.79        2.55        0.17 o
  -5   6   2        2.64        2.56        0.16 o
  -4   6   2        0.07        0.11        0.05 o
  -3   6   2        0.29        0.12        0.06 o
  -2   6   2        1.88        2.26        0.20 o
  -1   6   2        1.24        1.46        0.31 o
   0   6   2        2.00        2.08        0.20 o
   1   6   2        4.41        4.39        0.22 o
   2   6   2       10.83       11.07        0.32 o
   3   6   2        7.92        8.78        0.28 o
   4   6   2        7.93        7.95        0.28 o
   5   6   2        4.72        4.75        0.25 o
   6   6   2        0.10        0.10        0.05 o
  -6   7   2        0.37        0.18        0.11 o
  -5   7   2       -0.01        0.00        0.04 o
  -4   7   2        1.47        1.31        0.39 o
  -3   7   2        2.53        2.17        0.17 o
  -2   7   2        0.07        0.09        0.04 o
  -1   7   2        0.21        0.34        0.08 o
   0   7   2        0.34        0.02        0.09 o
   1   7   2        1.49        1.39        0.42 o
   2   7   2        2.81        2.70        0.20 o
   3   7   2        0.02        0.04        0.05 o
   4   7   2        0.00        0.04        0.07 o
   5   7   2       -0.10        0.05        0.07 o
  -4   8   2       -0.09        0.00        0.08 o
  -3   8   2        1.67        1.25        0.51 o
  -2   8   2        3.96        4.22        0.26 o
  -1   8   2        1.99        1.70        0.20 o
   0   8   2        0.06        0.00        0.07 o
   1   8   2        3.05        2.91        0.24 o
   2   8   2        1.72        1.75        0.63 o
   3   8   2        6.87        7.80        0.37 o
  -9   1   3        1.86        1.87        0.22 o
  -8   1   3       21.63       21.73        0.43 o
  -7   1   3        4.23        4.09        0.17 o
  -6   1   3       38.30       39.35        0.69 o
  -5   1   3        0.01        0.11        0.03 o
  -4   1   3        1.26        1.47        0.26 o
  -3   1   3      106.59      110.55        1.44 o
  -2   1   3        8.49        7.20        0.18 o
  -1   1   3       35.98       36.09        0.48 o
   0   1   3       30.89       29.86        0.42 o
   1   1   3       47.78       41.85        0.67 o
   2   1   3       10.82       11.40        0.23 o
   3   1   3        3.53        4.33        0.19 o
   4   1   3       13.47       12.40        0.36 o
   5   1   3        0.11        0.24        0.05 o
   6   1   3       25.02       25.11        0.59 o
   7   1   3        0.52        0.97        0.11 o
   8   1   3        2.13        2.29        0.26 o
  -9   2   3        1.10        1.07        0.34 o
  -8   2   3        2.98        3.00        0.16 o
  -7   2   3       15.95       16.35        0.37 o
  -6   2   3       28.84       30.21        0.50 o
  -5   2   3        0.41        0.46        0.06 o
  -4   2   3       15.46       17.65        0.29 o
  -3   2   3        5.48        4.74        0.15 o
  -2   2   3       40.79       44.99        0.56 o
  -1   2   3      438.81      440.63        5.29 o
   0   2   3        9.17        9.16        0.19 o
   1   2   3       58.00       50.89        0.89 o
   2   2   3        6.85        7.81        0.19 o
   3   2   3        0.02        0.05        0.03 o
   4   2   3       69.98       73.14        1.19 o
   5   2   3       24.52       24.00        0.66 o
   6   2   3        0.60        1.16        0.12 o
   7   2   3        0.21        0.20        0.08 o
   8   2   3        0.12        0.00        0.08 o
  -9   3   3        3.04        2.88        0.20 o
  -8   3   3       -0.15        0.02        0.05 o
  -7   3   3        0.14        0.06        0.05 o
  -6   3   3        0.06        0.01        0.04 o
  -5   3   3       17.91       21.46        0.35 o
  -4   3   3       31.42       33.69        0.53 o
  -3   3   3        7.29        6.84        0.21 o
  -2   3   3        1.34        2.13        0.27 o
  -1   3   3        0.10        0.00        0.03 o
   0   3   3        9.89       10.85        0.23 o
   1   3   3       20.96       21.95        0.53 o
   2   3   3       23.85       23.93        0.51 o
   3   3   3        7.73        8.01        0.27 o
   4   3   3        1.43        1.22        0.41 o
   5   3   3        1.10        1.30        0.37 o
   6   3   3        0.50        0.43        0.13 o
   7   3   3        4.32        4.00        0.35 o
  -8   4   3        0.70        0.80        0.14 o
  -7   4   3        0.03        0.00        0.05 o
  -6   4   3        0.73        0.98        0.11 o
  -5   4   3        9.76       10.94        0.25 o
  -4   4   3        6.92        7.77        0.21 o
  -3   4   3       27.69       31.27        0.49 o
  -2   4   3        2.07        1.98        0.14 o
  -1   4   3       52.74       53.08        0.84 o
   0   4   3        6.36        6.82        0.22 o
   1   4   3       55.25       54.71        1.00 o
   2   4   3       17.33       17.52        0.43 o
   3   4   3       23.05       23.57        0.52 o
   4   4   3       10.70       11.28        0.33 o
   5   4   3        1.71        1.42        0.69 o
   6   4   3        8.48        8.28        0.36 o
   7   4   3        0.51        0.25        0.18 o
  -8   5   3        2.88        2.90        0.25 o
  -7   5   3        1.64        1.59        0.42 o
  -6   5   3        6.05        5.31        0.21 o
  -5   5   3        0.09        0.07        0.05 o
  -4   5   3        0.67        0.71        0.11 o
  -3   5   3       13.59       12.54        0.31 o
  -2   5   3        0.21        0.17        0.06 o
  -1   5   3        4.00        3.88        0.18 o
   0   5   3        3.87        3.73        0.22 o
   1   5   3        6.58        6.82        0.27 o
   2   5   3        1.15        1.05        0.40 o
   3   5   3        0.07        0.03        0.04 o
   4   5   3        1.05        1.17        0.42 o
   5   5   3        0.08        0.05        0.10 o
   6   5   3        4.46        4.58        0.29 o
  -7   6   3        2.28        2.17        0.37 o
  -6   6   3        1.11        1.07        0.38 o
  -5   6   3        2.45        3.08        0.17 o
  -4   6   3        0.29        0.22        0.08 o
  -3   6   3       14.11       15.25        0.33 o
  -2   6   3       11.33       10.69        0.32 o
  -1   6   3        0.11        0.03        0.08 o
   0   6   3        6.78        6.64        0.27 o
   1   6   3        9.13        8.62        0.31 o
   2   6   3        6.77        7.47        0.28 o
   3   6   3       11.87       12.45        0.37 o
   4   6   3        0.14        0.26        0.11 o
   5   6   3        0.70        0.93        0.15 o
  -5   7   3       11.10       10.09        0.32 o
  -4   7   3       10.63       10.40        0.30 o
  -3   7   3        0.09        0.11        0.06 o
  -2   7   3       -0.13        0.00        0.06 o
  -1   7   3        0.60        0.44        0.14 o
   0   7   3        1.54        1.33        0.48 o
   1   7   3        4.34        4.38        0.24 o
   2   7   3        6.51        6.84        0.28 o
   3   7   3        2.29        2.05        0.22 o
   4   7   3        1.42        1.60        0.57 o
  -2   8   3        0.23        0.40        0.11 o
  -1   8   3       -0.16        0.00        0.08 o
   0   8   3        0.44        0.64        0.14 o
   1   8   3        0.77        0.92        0.18 o
  -9   0   4        1.08        1.00        0.50 o
  -8   0   4       12.26       11.40        0.44 o
  -7   0   4       43.70       44.31        1.03 o
  -6   0   4        1.20        1.04        0.48 o
  -5   0   4       12.98       15.22        0.41 o
  -4   0   4       14.91       14.26        0.42 o
  -3   0   4        9.34        8.98        0.31 o
  -2   0   4      232.88      238.25        4.02 o
  -1   0   4       30.10       29.78        0.71 o
   0   0   4        7.47        8.76        0.25 o
   1   0   4        0.27        0.81        0.07 o
   2   0   4        0.14        0.01        0.06 o
   3   0   4       18.85       21.81        0.67 o
   4   0   4       20.58       21.55        0.72 o
   5   0   4        8.57        7.11        0.43 o
   6   0   4        0.46        0.04        0.15 o
   7   0   4        2.81        3.18        0.32 o
  -9   1   4        2.78        2.55        0.18 o
  -8   1   4        0.31        0.04        0.07 o
  -7   1   4        1.01        0.90        0.28 o
  -6   1   4        4.47        4.77        0.22 o
  -5   1   4       11.48       13.11        0.27 o
  -4   1   4        5.67        5.87        0.18 o
  -3   1   4        3.04        3.02        0.13 o
  -2   1   4        8.24        8.73        0.21 o
  -1   1   4       11.15       11.33        0.21 o
   0   1   4       63.38       60.09        0.90 o
   1   1   4        4.71        4.86        0.17 o
   2   1   4        0.32        0.67        0.06 o
   3   1   4       10.23       10.50        0.32 o
   4   1   4        0.22        0.29        0.06 o
   5   1   4       10.65       10.57        0.34 o
   6   1   4        3.46        3.39        0.22 o
   7   1   4        0.11        0.00        0.07 o
  -8   2   4        0.09        0.05        0.05 o
  -7   2   4        3.64        4.56        0.22 o
  -6   2   4        5.55        5.71        0.21 o
  -5   2   4        8.16        9.00        0.24 o
  -4   2   4       11.63       13.19        0.28 o
  -3   2   4        2.17        2.40        0.15 o
  -2   2   4       16.23       17.38        0.32 o
  -1   2   4       -0.04        0.01        0.04 o
   0   2   4        6.37        8.21        0.25 o
   1   2   4        0.22        0.29        0.05 o
   2   2   4        2.53        2.80        0.19 o
   3   2   4        0.46        0.26        0.09 o
   4   2   4       -0.06        0.09        0.06 o
   5   2   4        0.19        0.16        0.09 o
   6   2   4        0.63        0.44        0.17 o
   7   2   4        0.27        0.53        0.13 o
  -8   3   4        0.09        0.01        0.05 o
  -7   3   4        1.82        1.75        0.23 o
  -6   3   4        1.93        2.11        0.16 o
  -5   3   4        5.38        5.66        0.20 o
  -4   3   4        1.17        0.95        0.34 o
  -3   3   4        1.13        0.85        0.32 o
  -2   3   4       14.92       14.76        0.30 o
  -1   3   4        8.58        9.25        0.29 o
   0   3   4       72.54       71.26        1.28 o
   1   3   4        0.16        0.23        0.09 o
   2   3   4        5.11        4.66        0.25 o
   3   3   4       25.57       25.89        0.66 o
   4   3   4        3.31        3.28        0.31 o
   5   3   4       21.90       22.59        0.82 o
   6   3   4        2.44        2.31        0.30 o
  -7   4   4        6.09        5.46        0.26 o
  -6   4   4        0.83        1.01        0.14 o
  -5   4   4       -0.01        0.06        0.03 o
  -4   4   4       -0.01        0.28        0.04 o
  -3   4   4        9.45       10.78        0.26 o
  -2   4   4       28.47       27.47        0.59 o
  -1   4   4        9.70        9.33        0.35 o
   0   4   4        0.63        0.99        0.13 o
   1   4   4       -0.02        0.01        0.05 o
   2   4   4        2.67        3.08        0.21 o
   3   4   4        8.67        9.22        0.36 o
   4   4   4        5.44        6.03        0.31 o
   5   4   4        2.49        1.78        0.31 o
   6   4   4        0.40        0.21        0.21 o
  -7   5   4       -0.09        0.05        0.07 o
  -6   5   4        2.46        2.10        0.17 o
  -5   5   4        5.56        5.49        0.22 o
  -4   5   4        8.52        9.72        0.26 o
  -3   5   4        2.20        2.56        0.18 o
  -2   5   4        3.38        3.84        0.25 o
  -1   5   4        0.17        0.34        0.06 o
   0   5   4        0.46        0.45        0.13 o
   1   5   4       20.39       21.16        0.51 o
   2   5   4       18.19       19.59        0.48 o
   3   5   4        4.14        4.55        0.25 o
   4   5   4        2.36        2.43        0.29 o
   5   5   4        2.20        2.24        0.34 o
  -5   6   4        3.42        2.98        0.20 o
  -4   6   4        8.00        8.06        0.30 o
  -3   6   4        1.77        1.52        0.30 o
  -2   6   4        5.68        4.96        0.31 o
  -1   6   4        0.48        0.84        0.14 o
   0   6   4        7.18        7.03        0.30 o
   1   6   4        0.28        0.11        0.11 o
   2   6   4        1.60        1.86        0.54 o
   3   6   4        0.28        0.11        0.14 o
   4   6   4       -0.02        0.00        0.05 o
  -3   7   4       -0.18        0.04        0.09 o
  -2   7   4       -0.06        0.16        0.07 o
  -1   7   4        0.00        0.12        0.09 o
   0   7   4        0.43        0.18        0.15 o
   1   7   4        0.84        1.11        0.19 o
  -8   1   5        1.71        1.62        0.52 o
  -7   1   5        5.67        4.94        0.24 o
  -6   1   5       16.51       16.54        0.44 o
  -5   1   5        1.50        1.19        0.51 o
  -4   1   5        0.07        0.03        0.05 o
  -3   1   5       40.87       40.10        0.69 o
  -2   1   5        0.90        0.84        0.13 o
  -1   1   5       75.91       74.16        1.29 o
   0   1   5        1.11        1.10        0.38 o
   1   1   5        3.52        3.59        0.25 o
   2   1   5       14.57       15.16        0.50 o
   3   1   5        6.51        6.53        0.33 o
   4   1   5        5.64        6.49        0.33 o
   5   1   5        4.64        4.61        0.31 o
  -7   2   5        0.62        0.85        0.15 o
  -6   2   5       -0.04        0.04        0.05 o
  -5   2   5        0.44        0.27        0.09 o
  -4   2   5        3.45        3.50        0.18 o
  -3   2   5       18.81       18.55        0.40 o
  -2   2   5       19.47       19.52        0.47 o
  -1   2   5       13.03       12.73        0.38 o
   0   2   5        0.25        0.35        0.09 o
   1   2   5        7.76        6.73        0.30 o
   2   2   5        0.26        0.38        0.09 o
   3   2   5        3.77        3.52        0.28 o
   4   2   5       19.67       18.02        0.64 o
   5   2   5        0.99        1.25        0.24 o
  -7   3   5        0.49        0.50        0.12 o
  -6   3   5        1.69        1.29        0.45 o
  -5   3   5        8.74        9.63        0.28 o
  -4   3   5        6.50        6.80        0.23 o
  -3   3   5        0.12        0.19        0.09 o
  -2   3   5        0.72        0.87        0.18 o
  -1   3   5        0.51        0.43        0.11 o
   0   3   5        9.47        8.72        0.33 o
   1   3   5       11.23       12.29        0.43 o
   2   3   5        0.62        0.65        0.21 o
   3   3   5        0.14        0.25        0.10 o
   4   3   5        0.31        0.12        0.26 o
   5   3   5        0.76        0.73        0.25 o
  -6   4   5        3.55        3.33        0.22 o
  -5   4   5        1.56        1.43        0.50 o
  -4   4   5        1.18        1.27        0.41 o
  -3   4   5        0.23        0.07        0.10 o
  -2   4   5        0.20        0.00        0.10 o
  -1   4   5        0.11        0.01        0.06 o
   0   4   5        2.43        2.08        0.21 o
   1   4   5        1.35        1.27        0.62 o
   2   4   5        7.06        6.57        0.36 o
   3   4   5        2.08        1.84        0.31 o
   4   4   5        4.46        4.40        0.39 o
  -5   5   5        0.11        0.10        0.07 o
  -4   5   5        0.14        0.15        0.07 o
  -3   5   5        5.27        4.40        0.31 o
  -2   5   5        0.56        0.44        0.18 o
  -1   5   5       10.18        8.18        0.42 o
   0   5   5        0.55        0.23        0.15 o
   1   5   5        0.16        0.18        0.10 o
   2   5   5        1.61        1.54        0.67 o
   3   5   5        0.38        0.55        0.15 o
  -3   6   5        1.51        2.09        0.69 o
  -2   6   5        2.40        1.60        0.26 o
  -1   6   5        1.66        1.16        0.75 o
   0   6   5        1.02        0.75        0.52 o
   1   6   5       -0.08        0.11        0.13 o
  -6   0   6        0.50        0.65        0.18 o
  -5   0   6        3.58        3.42        0.34 o
  -4   0   6        0.25        0.02        0.10 o
  -3   0   6       10.22        9.45        0.63 o
  -1   0   6       -0.18        0.03        0.12 o
   0   0   6       15.37       16.88        0.93 o
   1   0   6        1.78        1.19        0.39 o
   2   0   6       -0.05        0.08        0.07 o
   3   0   6       25.88       22.95        1.42 o
  -6   1   6        0.55        0.68        0.13 o
  -5   1   6        1.27        1.19        0.44 o
  -4   1   6        5.12        4.95        0.23 o
  -3   1   6        0.05        0.09        0.05 o
  -2   1   6        5.05        4.75        0.31 o
  -1   1   6        3.89        4.51        0.35 o
   0   1   6        2.85        2.47        0.26 o
   1   1   6        2.32        2.01        0.25 o
   2   1   6        0.88        0.88        0.22 o
   3   1   6        0.04        0.01        0.04 o
  -5   2   6        0.06        0.11        0.05 o
  -4   2   6        2.33        2.74        0.32 o
  -3   2   6        0.00        0.08        0.10 o
  -2   2   6        4.38        3.92        0.36 o
  -1   2   6        1.30        1.12        0.66 o
   0   2   6        5.29        5.33        0.40 o
   1   2   6        2.92        3.01        0.32 o
   2   2   6        2.93        3.12        0.35 o
   3   2   6        2.07        2.19        0.27 o
  -5   3   6        0.12        0.06        0.11 o
  -4   3   6        9.26        8.27        0.39 o
  -3   3   6        0.07        0.27        0.07 o
  -2   3   6        8.27        7.90        0.40 o
  -1   3   6        2.54        2.54        0.26 o
   0   3   6       -0.01        0.08        0.08 o
   1   3   6        0.40        0.25        0.17 o
   2   3   6        0.53        0.69        0.21 o
  -3   4   6        4.06        4.32        0.31 o
  -2   4   6        5.41        4.42        0.35 o
  -1   4   6        0.37        0.50        0.23 o
   0   4   6        0.10        0.25        0.10 o
   1   4   6        0.72        0.88        0.36 o
