# Supplementary material for: Competition between hydrogen bonding and dispersion interactions in the crystal structures of the primary amines
Source: Royal Society of Chemistry journal article supplement (doi:10.1039/c3ce42639d), 2014-01-01
Supplement: c3ce42639d5.fcf [file c3ce42639d5.fcf]

data_heptylamine 
#  Heptylamine in P2(1)/c at 150K                       
_audit_creation_date        "13-02-07"
_audit_creation_method      CRYSTALS 

_cell_length_a                    5.5651(5)
_cell_angle_alpha                 90
_cell_length_b                    41.692(4)
_cell_angle_beta                  90.127(7)
_cell_length_c                    6.9965(7)
_cell_angle_gamma                 90
loop_
 _symmetry_equiv_pos_as_xyz
 'x,y,z'
 '-x,-y,-z'
 '-x,y+1/2,-z+1/2'
 'x,-y+1/2,z+1/2'

# NOTE FO on scale of Fc,      4.97254
# Status flags: 
#    o - used in refinement 
#    < - excluded by I/sigmaI cutoff 
#    l - excluded at low resolution  
#    h - excluded at high resolution  
#    x - excluded for another reason  

loop_
_refln_index_h
_refln_index_k
_refln_index_l
_refln_F_squared_meas
_refln_F_squared_calc
_refln_F_squared_sigma
_refln_observed_status
_refln_refinement_weight
   1   0   0       -0.56        0.01        0.55 o   0.7555E-02
   2   0   0     2086.61     1715.83      163.54 o   0.1233E-04
   3   0   0        2.35        1.12        4.73 o   0.7530E-02
   4   0   0      289.31      346.60       21.99 o   0.2546E-03
   5   0   0        0.93        2.52        2.59 o   0.7476E-02
   6   0   0       98.90       72.15       26.70 o   0.1685E-02
   1   1   0        1.62        0.17        0.89 o   0.7493E-02
   2   1   0     1110.03     1118.98       62.95 o   0.3110E-04
   3   1   0        0.38        0.17        1.14 o   0.7521E-02
   4   1   0       56.85       40.17       10.50 o   0.2439E-02
   5   1   0       -6.92        0.09        7.59 o   0.7124E-02
   6   1   0      164.59       97.59       29.35 o   0.1205E-02
   1   2   0       -4.80        0.08        1.74 o   0.7272E-02
   2   2   0       38.75       23.62        5.57 o   0.4601E-02
   3   2   0        2.35        0.41        3.20 o   0.7465E-02
   4   2   0     1381.97     1437.04       70.24 o   0.1880E-04
   5   2   0        1.40        0.01        3.53 o   0.7572E-02
   6   2   0      509.65      380.28       40.41 o   0.2906E-03
   1   3   0       -1.11        0.05        0.84 o   0.7517E-02
   2   3   0      484.30      583.90       28.45 o   0.9978E-04
   3   3   0       -1.51        1.66        2.56 o   0.7559E-02
   4   3   0      767.61      788.54       38.58 o   0.6251E-04
   5   3   0        6.46        0.31        7.59 o   0.7185E-02
   6   3   0      318.67      256.64       30.18 o   0.5434E-03
   0   4   0     1872.15     1639.98      146.30 o   0.1407E-04
   1   4   0       -1.11        2.64        0.94 o   0.7462E-02
   2   4   0     2440.92     2465.62      132.66 o   0.7431E-05
   3   4   0       -6.03        0.09        5.37 o   0.7182E-02
   4   4   0       40.41       40.73        7.59 o   0.2533E-02
   5   4   0       -5.20        1.48        7.71 o   0.7358E-02
   6   4   0      120.77       46.93       26.23 o   0.2072E-02
   1   5   0       -3.72        0.32        2.11 o   0.7353E-02
   2   5   0     3549.32     3542.22      171.82 o   0.3993E-05
   3   5   0       -1.02        0.46        2.51 o   0.7569E-02
   4   5   0      347.12      385.11       20.38 o   0.2171E-03
   5   5   0        1.20        0.30        3.81 o   0.7554E-02
   6   5   0      267.64      226.99       27.66 o   0.6596E-03
   0   6   0     1270.25     1151.67      141.78 o   0.2807E-04
   1   6   0        0.93        0.49        0.65 o   0.7518E-02
   2   6   0       22.42        8.35        4.71 o   0.6709E-02
   3   6   0        0.93        0.83        1.24 o   0.7515E-02
   4   6   0      216.96      244.18       16.11 o   0.4386E-03
   5   6   0        4.61        1.07        8.97 o   0.7363E-02
   6   6   0      116.43      113.90       19.32 o   0.1324E-02
   1   7   0       -1.20        0.63        2.07 o   0.7526E-02
   2   7   0     4249.41     4227.40      207.45 o   0.3000E-05
   3   7   0        5.40        0.03        5.55 o   0.7241E-02
   4   7   0       69.38       72.21        9.94 o   0.1556E-02
   5   7   0        3.72        0.29        8.25 o   0.7348E-02
   6   7   0        0.71        1.92        4.18 o   0.7473E-02
   0   8   0      724.51      726.49       56.21 o   0.7348E-04
   1   8   0        4.80        1.02        3.49 o   0.7310E-02
   2   8   0     1734.42     1658.55       86.98 o   0.1461E-04
   3   8   0        2.63        0.00        4.03 o   0.7402E-02
   4   8   0       31.00       31.70        8.86 o   0.3490E-02
   5   8   0        5.40        2.61        9.94 o   0.7463E-02
   6   8   0       14.66        7.23       22.85 o   0.7221E-02
   1   9   0        0.23        0.18        0.90 o   0.7568E-02
   2   9   0       -1.73        0.42        2.49 o   0.7480E-02
   3   9   0       -3.39        1.96        4.58 o   0.7450E-02
   4   9   0        1.73        8.39        4.32 o   0.7020E-02
   5   9   0       -1.30        0.32        4.87 o   0.7558E-02
   6   9   0       -3.96        0.12        8.11 o   0.7558E-02
   0  10   0      234.08      248.98       19.78 o   0.4590E-03
   1  10   0       -2.22        0.59        2.67 o   0.7494E-02
   2  10   0     1929.49     1789.16       96.11 o   0.1240E-04
   3  10   0        6.69        0.01        6.69 o   0.7138E-02
   4  10   0        4.80        0.91        7.19 o   0.7320E-02
   5  10   0       -6.03        1.17       10.50 o   0.7264E-02
   6  10   0       14.28        6.01       18.79 o   0.7187E-02
   1  11   0       -3.55        0.61        3.37 o   0.7389E-02
   2  11   0     1819.42     1582.92       89.08 o   0.1499E-04
   3  11   0       -2.78        0.00        4.47 o   0.7392E-02
   4  11   0       -0.49        0.30        2.14 o   0.7556E-02
   5  11   0        6.03        0.58        9.77 o   0.7234E-02
   6  11   0        0.89        2.06        2.19 o   0.7476E-02
   0  12   0      105.23       93.44       11.22 o   0.1249E-02
   1  12   0       -4.61        0.00        4.06 o   0.7272E-02
   2  12   0       12.61       12.87        7.77 o   0.7510E-02
   3  12   0       -2.78        0.04        4.64 o   0.7393E-02
   4  12   0       93.86       64.66       11.56 o   0.1511E-02
   5  12   0       -4.43        0.07        8.79 o   0.7292E-02
   6  12   0      -18.72        5.49       25.38 o   0.6896E-02
   1  13   0       -0.32        0.14        0.94 o   0.7574E-02
   2  13   0      280.44      238.83       16.65 o   0.4523E-03
   3  13   0       -0.43        0.00        1.39 o   0.7574E-02
   4  13   0      148.52      123.36       13.33 o   0.9377E-03
   5  13   0      -13.24        0.00       14.47 o   0.6725E-02
   0  14   0        1.85        0.57        3.65 o   0.7467E-02
   1  14   0       -5.81        0.83        4.32 o   0.7259E-02
   2  14   0      127.92       98.83       10.12 o   0.1096E-02
   3  14   0       -0.77        0.45        1.44 o   0.7523E-02
   4  14   0        1.62        1.11        5.18 o   0.7495E-02
   5  14   0       -8.63        0.01       12.27 o   0.7012E-02
   6  14   0      -12.12        0.48       32.54 o   0.7553E-02
   1  15   0        0.56        0.67        0.90 o   0.7518E-02
   2  15   0        4.07        0.49        4.81 o   0.7353E-02
   3  15   0        1.62        0.02        3.92 o   0.7575E-02
   4  15   0       43.24       34.04       10.46 o   0.2830E-02
   5  15   0        3.89        0.02        8.24 o   0.7330E-02
   6  15   0        7.75        0.02       19.39 o   0.7571E-02
   0  16   0       24.98       38.31        6.46 o   0.2332E-02
   1  16   0       -0.23        0.20        0.90 o   0.7557E-02
   2  16   0        1.30        1.21        2.83 o   0.7558E-02
   3  16   0       -4.43        0.53        6.70 o   0.7340E-02
   4  16   0       27.21       14.90        9.86 o   0.6633E-02
   5  16   0        3.39        1.05        8.42 o   0.7496E-02
   6  16   0       17.45        0.41       28.25 o   0.6717E-02
   1  17   0        2.49        0.26        2.98 o   0.7421E-02
   2  17   0        3.23        0.94        4.47 o   0.7463E-02
   3  17   0       -3.55        0.08        6.19 o   0.7345E-02
   4  17   0       -6.03        2.49       10.50 o   0.7325E-02
   5  17   0       -1.30        0.06        4.87 o   0.7573E-02
   6  17   0       21.39       24.33       27.13 o   0.7458E-02
   0  18   0     7756.51     6198.91      595.59 o   0.1336E-05
   1  18   0       -2.49        0.26        3.14 o   0.7443E-02
   2  18   0       35.55       45.46        6.52 o   0.2216E-02
   3  18   0       -8.37        0.06       12.37 o   0.7043E-02
   4  18   0        2.63        0.90        8.23 o   0.7507E-02
   5  18   0       -6.24        0.46       12.67 o   0.7190E-02
   6  18   0       34.43        3.50       18.09 o   0.6063E-02
   1  19   0       -5.81        1.17        5.28 o   0.7282E-02
   2  19   0       -1.62        2.21        3.29 o   0.7514E-02
   3  19   0       -7.15        0.63       11.97 o   0.7159E-02
   4  19   0       -6.92        0.24       13.08 o   0.7138E-02
   5  19   0        7.87        0.00       18.42 o   0.7576E-02
   6  19   0       -3.20        7.89       16.20 o   0.7174E-02
   0  20   0      461.42      338.08       38.45 o   0.2366E-03
   1  20   0        4.43        1.57        4.81 o   0.7398E-02
   2  20   0       11.99        9.55        9.99 o   0.7523E-02
   3  20   0       -3.89        0.02        8.83 o   0.7575E-02
   4  20   0      102.55      119.71       15.11 o   0.9788E-03
   5  20   0        2.92        0.44       11.73 o   0.7540E-02
   6  20   0       79.23       59.85       28.33 o   0.2091E-02
   1  21   0       -0.23        0.45        1.14 o   0.7544E-02
   2  21   0       -2.49        1.01        4.55 o   0.7502E-02
   3  21   0       -3.72        0.07        8.82 o   0.7537E-02
   4  21   0      230.07      243.47       21.12 o   0.4917E-03
   5  21   0       16.62        0.06       30.81 o   0.6509E-02
   6  21   0       24.23       46.98       49.45 o   0.2178E-02
   0  22   0      715.10      552.36       55.85 o   0.1048E-03
   1  22   0        5.60        6.46        5.89 o   0.7572E-02
   2  22   0      342.24      363.71       22.08 o   0.2484E-03
   3  22   0       -7.63        0.09       12.63 o   0.7079E-02
   4  22   0       99.90       86.91       13.92 o   0.1306E-02
   5  22   0       -6.69        0.00       17.23 o   0.7576E-02
   1  23   0       16.98        1.13       13.52 o   0.6606E-02
   2  23   0      264.52      281.80       17.79 o   0.3598E-03
   3  23   0        0.77        1.93        2.29 o   0.7489E-02
   4  23   0       74.58       75.98       13.74 o   0.1440E-02
   5  23   0      -13.88        0.17       25.57 o   0.6703E-02
   0  24   0        1.51        1.05        4.64 o   0.7490E-02
   1  24   0        2.92        0.82        5.78 o   0.7418E-02
   2  24   0       89.66       80.86       10.36 o   0.1389E-02
   3  24   0        1.11        3.90        5.02 o   0.7296E-02
   4  24   0      251.84      256.75       22.10 o   0.4487E-03
   5  24   0       -6.46        0.07       23.26 o   0.7574E-02
   1  25   0        9.96        1.47        9.42 o   0.7007E-02
   2  25   0      292.30      289.05       23.80 o   0.3747E-03
   3  25   0       38.75        0.32       11.76 o   0.5233E-02
   4  25   0      120.11      127.68       15.26 o   0.9700E-03
   5  25   0      -14.55        0.11       37.17 o   0.7570E-02
   0  26   0      655.44      592.56       53.47 o   0.1002E-03
   1  26   0       19.60        1.25        8.81 o   0.6366E-02
   2  26   0      440.94      393.90       31.32 o   0.2086E-03
   3  26   0       24.54        4.12       14.78 o   0.6270E-02
   4  26   0        1.73        0.74        6.28 o   0.7524E-02
   5  26   0        1.20        0.34        7.85 o   0.7541E-02
   1  27   0        7.63        0.03        9.06 o   0.7080E-02
   2  27   0      459.54      485.35       31.98 o   0.1524E-03
   3  27   0       43.24        3.73       22.23 o   0.5119E-02
   4  27   0        4.43        0.62       10.25 o   0.7509E-02
   5  27   0        2.63        0.08       11.29 o   0.7576E-02
   0  28   0       -0.28        0.22        2.34 o   0.7546E-02
   1  28   0        0.93        1.80        1.69 o   0.7402E-02
   2  28   0     1346.35     1314.42       87.58 o   0.2271E-04
   3  28   0       19.22        0.45       23.11 o   0.6368E-02
   4  28   0       12.30       23.31       18.83 o   0.4836E-02
   5  28   0       13.24        0.15       26.05 o   0.6752E-02
   1  29   0       -1.73        0.92        4.58 o   0.7481E-02
   2  29   0     2748.96     2593.62      172.07 o   0.6576E-05
   3  29   0        7.39        0.05       13.52 o   0.7097E-02
   4  29   0       15.22       14.75       29.10 o   0.7494E-02
   5  29   0       14.55        0.70       27.31 o   0.6683E-02
   0  30   0      541.87      481.99       46.30 o   0.1439E-03
   1  30   0        7.87        0.15       10.32 o   0.7095E-02
   2  30   0      251.84      222.26       22.10 o   0.5036E-03
   3  30   0        6.24        1.40       12.67 o   0.7282E-02
   4  30   0       78.42       64.44       18.49 o   0.1596E-02
   5  30   0        4.61        0.77       21.58 o   0.7500E-02
   1  31   0        5.20        0.58        8.61 o   0.7276E-02
   2  31   0      476.61      490.03       34.74 o   0.1435E-03
   3  31   0       -6.24        0.19       13.17 o   0.7188E-02
   4  31   0      372.06      408.71       38.37 o   0.1983E-03
   5  31   0       50.44        0.25       25.43 o   0.4588E-02
   0  32   0        4.43        0.10       10.67 o   0.7573E-02
   1  32   0       -0.07        4.19        2.29 o   0.7304E-02
   2  32   0      383.99      360.13       29.23 o   0.2533E-03
   3  32   0       -7.39        0.01       14.33 o   0.7093E-02
   4  32   0      169.52      185.07       23.31 o   0.6461E-03
   1  33   0        7.63        4.28       13.18 o   0.7379E-02
   2  33   0       12.61        6.40       18.36 o   0.7188E-02
   3  33   0      -10.24        1.90       16.23 o   0.7118E-02
   4  33   0       84.75      117.77       27.47 o   0.9537E-03
   0  34   0      976.98      837.91       77.71 o   0.5021E-04
   1  34   0       12.30        3.35       16.74 o   0.6987E-02
   2  34   0      -13.56        1.42       19.04 o   0.6803E-02
   3  34   0        7.39        2.56       14.60 o   0.7212E-02
   4  34   0      408.42      452.98       58.29 o   0.1660E-03
   1  35   0       -4.43        0.48       10.04 o   0.7542E-02
   2  35   0       73.83       67.85       13.67 o   0.1620E-02
   3  35   0      -14.21        0.17       19.12 o   0.6677E-02
   4  35   0       30.51       40.86       24.72 o   0.2353E-02
   0  36   0     1987.69     1922.51      155.19 o   0.1117E-04
   1  36   0       -7.39        0.31       12.43 o   0.7104E-02
   2  36   0       58.85       48.74       13.73 o   0.2030E-02
   3  36   0       11.69        0.36       18.36 o   0.6823E-02
   4  36   0       51.69       31.71       26.45 o   0.3062E-02
   1  37   0       -1.40        0.48        5.77 o   0.7543E-02
   2  37   0        3.07        7.76        9.59 o   0.7017E-02
   3  37   0      -11.39        0.17       17.46 o   0.6841E-02
   4  37   0       -7.63        4.14       30.76 o   0.7343E-02
   0  38   0       91.33       62.95       15.21 o   0.1535E-02
   1  38   0        9.96        4.10       15.38 o   0.7230E-02
   2  38   0       -0.56        3.65        2.73 o   0.7327E-02
   3  38   0       -1.51        0.01        8.55 o   0.7575E-02
   4  38   0       65.06       54.83       28.88 o   0.1809E-02
   1  39   0       -9.42        0.33       14.34 o   0.6989E-02
   2  39   0        6.24       10.64       14.16 o   0.6937E-02
   3  39   0       16.62        0.00       31.22 o   0.6509E-02
   0  40   0       29.55       41.51       14.60 o   0.2329E-02
   1  40   0       -0.28        0.14        2.54 o   0.7562E-02
   2  40   0        3.89        7.48       10.99 o   0.7116E-02
   3  40   0       17.34        0.48       32.31 o   0.6517E-02
   1  41   0        4.61        0.15       10.90 o   0.7559E-02
   2  41   0        5.60       24.28       13.18 o   0.4291E-02
   3  41   0       12.92        0.01       28.24 o   0.6739E-02
   0  42   0        7.15        2.45       17.55 o   0.7463E-02
   1  42   0       -4.07        0.58       10.43 o   0.7537E-02
   2  42   0       16.62       16.07       28.79 o   0.7509E-02
   3  42   0       29.55        0.02       25.95 o   0.5743E-02
   1  43   0        1.85        0.16        7.16 o   0.7555E-02
   2  43   0        7.15        0.51       15.42 o   0.7160E-02
   3  43   0       -6.92        0.04       31.13 o   0.7567E-02
   0  44   0        3.72        3.03       13.24 o   0.7353E-02
   1  44   0      -10.81        0.22       20.60 o   0.6904E-02
   2  44   0       15.57       13.57       22.37 o   0.7504E-02
   3  44   0       -6.24        0.04       29.82 o   0.7570E-02
   1  45   0       -1.51        0.61        6.84 o   0.7525E-02
   2  45   0        6.69        3.36       15.43 o   0.7363E-02
   3  45   0       16.98        0.34       50.82 o   0.7546E-02
   0  46   0        3.07        5.05       10.99 o   0.7228E-02
   1  46   0        2.22        0.17        9.04 o   0.7561E-02
   2  46   0       35.55       14.98       28.46 o   0.6273E-02
   3  46   0        9.15        0.00       35.80 o   0.7575E-02
   1  47   0      -11.99        0.26       19.29 o   0.6815E-02
   2  47   0       -1.51        9.66       14.77 o   0.6939E-02
   0  48   0      -15.22        1.86       29.88 o   0.6756E-02
   1  48   0       20.79        0.07       19.04 o   0.6265E-02
   2  48   0       18.46       16.05       35.03 o   0.7447E-02
   1  49   0        0.38        0.92        2.88 o   0.7522E-02
   2  49   0       47.37        0.47       30.12 o   0.4788E-02
   1  50   0      -16.62        0.43       34.06 o   0.6530E-02
   1  51   0       -9.15        1.33       27.07 o   0.7498E-02
   0  52   0       99.90       71.35       25.84 o   0.1384E-02
  -5   1   1      284.61      273.72       16.78 o   0.4772E-03
  -4   1   1        8.06       11.32        8.47 o   0.7426E-02
  -3   1   1       70.49       71.77        6.68 o   0.1917E-02
  -2   1   1        4.12        4.82        3.83 o   0.7567E-02
  -1   1   1     1421.49     1330.20      108.74 o   0.6675E-05
   0   1   1       -0.09        1.52        0.30 o   0.7485E-02
   2   1   1        3.61        1.00        4.54 o   0.7265E-02
   4   1   1        3.88        4.11        6.86 o   0.7564E-02
   5   1   1      166.08      126.27       17.94 o   0.6899E-03
   6   1   1       18.72        1.08       27.97 o   0.6694E-02
  -5   2   1     1054.25     1159.15       54.89 o   0.2438E-04
  -4   2   1       21.72       19.27       13.91 o   0.7438E-02
  -3   2   1        7.43        5.39        6.23 o   0.7326E-02
  -2   2   1        5.74        2.94        4.29 o   0.7383E-02
  -1   2   1     1221.58     1031.59       86.90 o   0.2488E-04
   0   2   1        3.39        2.72        1.28 o   0.7501E-02
   1   2   1     1636.18     1763.87       84.48 o   0.1526E-04
   2   2   1       -0.15        1.24        0.94 o   0.7479E-02
   3   2   1       29.53       30.76        7.57 o   0.4605E-02
   4   2   1        0.48        0.39        1.69 o   0.7497E-02
   5   2   1     1223.11     1506.79       76.52 o   0.1742E-04
   6   2   1      -14.66        1.88       30.46 o   0.7503E-02
  -5   3   1      544.94      278.45       32.50 o   0.3006E-03
  -4   3   1        3.28        1.17        5.40 o   0.7187E-02
  -3   3   1       24.77       21.38        5.44 o   0.7386E-02
  -2   3   1        3.27        5.03        3.06 o   0.7457E-02
  -1   3   1     8527.33     8156.07      578.57 o   0.1530E-05
   0   3   1       71.58       68.96        5.89 o   0.1603E-02
   2   3   1        3.79        6.98        3.68 o   0.7375E-02
   3   3   1        5.50        4.40        5.83 o   0.7439E-02
   4   3   1       30.52        9.73       10.44 o   0.6475E-02
   6   3   1       23.75        0.48       29.56 o   0.6420E-02
  -6   4   1       16.22        0.10       24.03 o   0.6766E-02
  -5   4   1       53.43       45.84        8.00 o   0.1703E-02
  -4   4   1       31.60       34.96        6.71 o   0.2804E-02
  -3   4   1       23.74       21.14       11.63 o   0.7476E-02
  -2   4   1        4.84        6.84        3.72 o   0.7473E-02
  -1   4   1    19092.31    20140.62     1071.85 o   0.3295E-06
   0   4   1       11.99       12.80        2.76 o   0.7498E-02
   1   4   1    14776.08    15613.54      785.78 o   0.4015E-06
   2   4   1       34.80       34.12        5.28 o   0.4200E-02
   3   4   1        0.03        0.02        1.29 o   0.7381E-02
   4   4   1       39.73       39.30        8.15 o   0.2625E-02
   5   4   1       93.08      112.88       13.43 o   0.1110E-02
   6   4   1       -1.67        2.35        7.33 o   0.7445E-02
  -6   5   1       29.92        0.86       16.32 o   0.6153E-02
  -5   5   1        0.62        5.62        1.69 o   0.7259E-02
  -4   5   1       84.53       78.14        9.14 o   0.1707E-02
  -3   5   1      131.21      129.37        9.11 o   0.1015E-02
  -2   5   1      123.03      119.46        9.93 o   0.1223E-02
  -1   5   1      459.24      541.81       74.59 o   0.7649E-05
   0   5   1        2.92        3.76        1.19 o   0.7568E-02
   1   5   1     8459.60     8761.10      475.65 o   0.1356E-05
   2   5   1       20.67       18.64        5.43 o   0.2374E-02
   3   5   1      119.14      106.08        9.77 o   0.1068E-02
   4   5   1       17.37       18.30        5.39 o   0.3594E-02
   5   5   1       -0.18        0.29        2.24 o   0.7469E-02
   6   5   1        5.23        1.90       19.56 o   0.7497E-02
  -6   6   1       -3.20        0.29       15.31 o   0.7574E-02
  -5   6   1       39.58       35.18        7.51 o   0.2721E-02
  -4   6   1        0.09        2.78        1.39 o   0.7249E-02
  -3   6   1      717.41      707.95       37.29 o   0.5011E-04
  -2   6   1      155.56      142.56        8.68 o   0.9499E-03
  -1   6   1     1232.71     1301.16       90.78 o   0.2862E-04
   0   6   1        0.93        2.34        0.50 o   0.7473E-02
   1   6   1      584.17      637.14       50.48 o   0.5952E-04
   2   6   1       71.16       74.69       10.07 o   0.1343E-02
   3   6   1     1218.53     1466.44       83.32 o   0.2120E-04
   4   6   1       12.36       12.08       10.49 o   0.7521E-02
   5   6   1       33.49       40.72       10.94 o   0.2377E-02
   6   6   1        5.94        0.09       14.78 o   0.7567E-02
  -6   7   1      -13.18        0.03       22.38 o   0.6909E-02
  -5   7   1       15.10       14.97       12.36 o   0.7556E-02
  -4   7   1        0.04        0.10        1.39 o   0.7366E-02
  -3   7   1     1479.45     1405.24       76.50 o   0.2618E-04
  -2   7   1       72.38       66.33        7.61 o   0.9209E-03
  -1   7   1     2249.68     2435.90      132.08 o   0.8291E-05
   0   7   1      107.04      108.34        8.23 o   0.1144E-02
   1   7   1     1598.21     1662.77      111.32 o   0.1259E-04
   3   7   1      458.06      513.25       44.70 o   0.7265E-04
   4   7   1       18.69       21.46       18.92 o   0.7308E-02
   5   7   1       24.54       21.77       10.84 o   0.6265E-02
   6   7   1       20.93        0.09       40.95 o   0.6530E-02
  -6   8   1       -0.48        0.68        3.23 o   0.7562E-02
  -5   8   1       48.01       43.79        9.65 o   0.2124E-02
  -4   8   1        8.22       13.61        8.27 o   0.7351E-02
  -3   8   1     1141.42     1213.08       80.64 o   0.4101E-04
  -1   8   1      822.81      813.82       57.05 o   0.8908E-04
   0   8   1       39.30       46.74        3.74 o   0.2210E-02
   1   8   1       75.20       80.68       11.21 o   0.4790E-03
   2   8   1        0.72        0.70        0.65 o   0.3359E-02
   4   8   1       -0.47        0.56        2.09 o   0.7369E-02
   5   8   1       57.26       61.42       12.04 o   0.1826E-02
   6   8   1        4.36        3.28       12.25 o   0.7338E-02
  -5   9   1        1.96        1.04        5.57 o   0.7498E-02
  -4   9   1        5.18        2.29        7.47 o   0.7314E-02
  -3   9   1      750.47      698.67       62.66 o   0.2732E-04
  -2   9   1       13.74       14.71        4.79 o   0.4790E-02
  -1   9   1        0.14        0.16        0.55 o   0.9370E-03
   0   9   1        8.63        9.18        4.38 o   0.7538E-02
   1   9   1      553.15      620.09       39.76 o   0.1514E-03
   2   9   1       68.23       58.39        7.39 o   0.2079E-02
   4   9   1        5.44        4.84       10.21 o   0.7573E-02
   5   9   1        6.48        2.63       11.90 o   0.7334E-02
   6   9   1       14.28        0.04       31.57 o   0.7574E-02
  -6  10   1      -14.66        0.00       30.84 o   0.7576E-02
  -5  10   1        9.51       16.16       12.88 o   0.7245E-02
  -4  10   1        0.00        0.00        1.69 o   0.7491E-02
  -3  10   1      504.05      530.76       37.96 o   0.1991E-03
  -2  10   1      982.64      857.37       68.58 o   0.7543E-04
  -1  10   1      176.03      179.44       13.19 o   0.9098E-03
   0  10   1        3.23        5.34        2.68 o   0.7484E-02
   2  10   1       70.77       82.15       10.88 o   0.4538E-03
   3  10   1       11.30       12.32        4.35 o   0.1015E-02
   4  10   1        4.36        7.09        9.14 o   0.7149E-02
   5  10   1        6.48        3.67       11.65 o   0.7251E-02
   6  10   1       12.82        2.76       31.33 o   0.7400E-02
  -6  11   1        1.42        2.08        7.60 o   0.7448E-02
  -5  11   1        0.01        0.01        2.04 o   0.7455E-02
  -4  11   1       -7.39        0.33        9.19 o   0.7016E-02
  -2  11   1        0.63        0.58        0.65 o   0.6938E-03
  -1  11   1      493.86      578.32       26.52 o   0.1087E-03
   0  11   1       12.30       14.03        5.93 o   0.7457E-02
   1  11   1      455.23      477.63       25.46 o   0.1470E-03
   3  11   1       60.77       62.15        6.98 o   0.9535E-03
   4  11   1        3.68        0.74        8.40 o   0.7526E-02
   5  11   1       22.78       10.68       23.26 o   0.6852E-02
   6  11   1       14.66        3.08       18.66 o   0.6960E-02
  -6  12   1        5.70        3.92       20.18 o   0.7401E-02
  -5  12   1       21.36       25.90       20.22 o   0.5684E-02
  -4  12   1        5.65        2.83        9.46 o   0.7021E-02
  -3  12   1      347.47      285.35       24.10 o   0.2931E-03
  -2  12   1      551.11      510.87       37.35 o   0.1090E-03
  -1  12   1      545.28      592.82       27.87 o   0.1589E-03
   0  12   1       47.37       54.04        4.79 o   0.1907E-02
   2  12   1      868.20      824.94       46.89 o   0.6548E-04
   3  12   1      460.70      407.36       25.62 o   0.2268E-03
   4  12   1       37.46       25.89       11.57 o   0.6839E-02
   5  12   1        8.87        8.07       14.51 o   0.7443E-02
   6  12   1       11.43        9.86       21.19 o   0.7562E-02
  -6  13   1       -1.20        3.24        8.81 o   0.7408E-02
  -5  13   1        2.87        0.81        8.09 o   0.7140E-02
  -4  13   1       37.00       38.94        9.68 o   0.3502E-02
  -3  13   1       15.79       18.54        6.32 o   0.4802E-02
  -2  13   1      611.44      585.86       31.97 o   0.1616E-03
   0  13   1       93.86       96.20        7.71 o   0.1246E-02
   1  13   1      505.03      488.60       35.76 o   0.2374E-03
   3  13   1       40.08       42.78       10.07 o   0.2732E-02
   4  13   1        0.68        1.51        2.29 o   0.7233E-02
   5  13   1       15.03        8.71       18.12 o   0.7230E-02
   6  13   1       20.93        8.83       30.48 o   0.7019E-02
  -6  14   1       -0.25        4.38        2.98 o   0.7407E-02
  -5  14   1        8.88        2.70       14.22 o   0.7312E-02
  -4  14   1      119.66      119.06       14.14 o   0.1207E-02
  -3  14   1       15.91       19.65       13.09 o   0.7363E-02
  -2  14   1        1.17        0.69        2.05 o   0.2008E-02
  -1  14   1      107.84      112.75        8.26 o   0.1155E-02
   0  14   1        3.55        4.57        3.37 o   0.7522E-02
   1  14   1       77.23       71.40        7.87 o   0.1386E-02
   2  14   1      189.53      195.75       17.80 o   0.7655E-03
   3  14   1        5.16        8.44        9.26 o   0.7356E-02
   4  14   1       31.94       34.75        9.55 o   0.1941E-02
   5  14   1       -1.28        0.35        5.29 o   0.7485E-02
   6  14   1       48.46       38.75       18.00 o   0.3396E-02
  -6  15   1       44.40       42.87       15.90 o   0.2996E-02
  -5  15   1       17.37       16.71       26.94 o   0.7536E-02
  -4  15   1       53.96       40.79       10.23 o   0.1500E-02
  -3  15   1       -2.70        1.52        5.23 o   0.7530E-02
  -2  15   1       23.41       24.68       11.55 o   0.7560E-02
  -1  15   1       13.01       16.73        6.82 o   0.7315E-02
   0  15   1       17.34        8.96        8.28 o   0.7042E-02
   1  15   1       15.78       19.91        7.90 o   0.7357E-02
   2  15   1        2.63        1.25        4.67 o   0.7075E-02
   3  15   1       -3.64        0.30        7.21 o   0.7159E-02
   4  15   1      147.44      159.12       15.70 o   0.8997E-03
   5  15   1        3.59        3.07        8.29 o   0.7492E-02
   6  15   1        3.03        7.40       11.08 o   0.7246E-02
  -6  16   1      -15.43        7.64       22.66 o   0.7205E-02
  -5  16   1        0.16        4.79        3.18 o   0.6882E-02
  -4  16   1       46.55       35.56       16.29 o   0.3625E-02
  -3  16   1       -0.34        3.37        1.59 o   0.7366E-02
  -2  16   1       13.77       14.63        9.23 o   0.7533E-02
  -1  16   1      177.43      168.13       10.60 o   0.9160E-03
   0  16   1      101.66      108.91        8.02 o   0.1169E-02
   2  16   1       20.43       19.94        6.74 o   0.7534E-02
   3  16   1       -5.15        2.77        8.58 o   0.7374E-02
   4  16   1       10.95       10.69       14.81 o   0.7533E-02
   5  16   1       25.70       33.81       11.09 o   0.4282E-02
   6  16   1      -10.13        3.98       20.57 o   0.7371E-02
  -6  17   1       15.43        3.94       27.74 o   0.7016E-02
  -5  17   1       25.00       19.22       14.42 o   0.7188E-02
  -4  17   1       55.42       50.96       17.03 o   0.2295E-02
  -3  17   1        3.14        8.95        5.82 o   0.7233E-02
  -2  17   1       41.72       45.04        7.07 o   0.2792E-02
  -1  17   1       22.92       24.82        3.81 o   0.1407E-02
   0  17   1     2572.60     2476.18      141.24 o   0.7148E-05
   2  17   1        1.58        2.68        3.75 o   0.7273E-02
   3  17   1        1.92        0.60        5.66 o   0.7230E-02
   4  17   1       34.55       32.97        9.94 o   0.2818E-02
   5  17   1       15.54       14.65       18.43 o   0.7404E-02
   6  17   1      -12.12        9.28       31.15 o   0.7092E-02
  -6  18   1       25.22       18.22       15.98 o   0.7244E-02
  -5  18   1       41.35       69.58       22.38 o   0.1600E-02
  -4  18   1        0.19        1.91        3.23 o   0.7024E-02
  -3  18   1       11.21       12.36       11.32 o   0.7473E-02
  -2  18   1       14.83       14.72        4.21 o   0.3874E-02
  -1  18   1       20.26       19.79        9.85 o   0.7551E-02
   0  18   1      600.52      512.21       34.12 o   0.1258E-03
   1  18   1       11.80        8.60        7.86 o   0.7241E-02
   2  18   1       77.71       78.21       13.15 o   0.1694E-02
   3  18   1       35.52       28.86       10.08 o   0.5243E-02
   4  18   1       29.96       32.33       11.43 o   0.4562E-02
   5  18   1       26.54       25.76        8.71 o   0.2971E-02
   6  18   1       25.22        3.81       16.98 o   0.6529E-02
  -6  19   1       13.18        5.75       23.10 o   0.7243E-02
  -5  19   1       18.94       19.63       12.55 o   0.3704E-02
  -4  19   1       20.33       17.71       13.90 o   0.7115E-02
  -3  19   1       23.72       31.57       16.95 o   0.4234E-02
  -2  19   1       20.37       25.81       12.57 o   0.7398E-02
  -1  19   1       80.01       80.04        7.12 o   0.1134E-02
   0  19   1     1021.32      986.42       57.21 o   0.3941E-04
   1  19   1      197.68      221.98       20.97 o   0.6186E-03
   2  19   1        1.73        2.45        4.71 o   0.7453E-02
   3  19   1        0.20        0.13        2.04 o   0.7389E-02
   4  19   1       23.67       25.89       10.16 o   0.5115E-02
   5  19   1       55.89       73.44       12.64 o   0.1662E-02
   6  19   1      -17.03        3.81       28.73 o   0.6896E-02
  -6  20   1       11.43        0.18       21.52 o   0.7005E-02
  -5  20   1      177.02      211.74       23.82 o   0.5090E-03
  -4  20   1       22.79       21.52       29.91 o   0.7487E-02
  -3  20   1       -3.12        4.97        5.98 o   0.7384E-02
  -2  20   1       13.51        7.72       10.24 o   0.7275E-02
  -1  20   1       16.50       14.21        4.85 o   0.1318E-02
   0  20   1        1.02        0.49        2.21 o   0.7547E-02
   1  20   1      345.26      326.61       27.72 o   0.4244E-03
   2  20   1        6.86        8.68       10.16 o   0.7445E-02
   3  20   1       12.87       12.97       15.34 o   0.7557E-02
   4  20   1        0.02        0.00        2.29 o   0.6770E-02
   5  20   1      194.92      208.63       16.66 o   0.5698E-03
   6  20   1      -12.12        3.06       23.89 o   0.7084E-02
  -5  21   1       23.37       29.89       31.25 o   0.5246E-02
  -4  21   1        5.60        5.35       15.06 o   0.7489E-02
  -3  21   1        0.63        1.73        1.79 o   0.7386E-02
  -2  21   1       10.09       12.12        9.16 o   0.7387E-02
  -1  21   1      364.94      396.47       26.60 o   0.2681E-03
   0  21   1      150.67      121.84       10.99 o   0.9455E-03
   1  21   1      192.53      192.20       13.80 o   0.5040E-03
   2  21   1        0.45        0.17        1.99 o   0.7276E-02
   3  21   1       -7.99        4.33       13.77 o   0.7389E-02
   4  21   1       47.86       36.71       11.01 o   0.3568E-02
   5  21   1        0.32        1.67        2.49 o   0.7075E-02
   6  21   1       -9.20        0.60       20.81 o   0.7548E-02
  -5  22   1        9.60        3.68       20.34 o   0.7116E-02
  -4  22   1       40.33       25.29       15.16 o   0.4465E-02
  -3  22   1       19.32       30.99       20.54 o   0.3512E-02
  -2  22   1       32.72       31.12        8.53 o   0.3045E-02
  -1  22   1     2388.44     2789.02      160.39 o   0.6498E-05
   0  22   1        6.03        4.84        5.62 o   0.7489E-02
   1  22   1     1461.69     1481.53      136.88 o   0.1347E-04
   2  22   1       72.36       56.86       11.00 o   0.1971E-02
   3  22   1       19.69       24.79       11.03 o   0.4008E-02
   4  22   1       24.05       17.80       10.73 o   0.7000E-02
   5  22   1        6.35        7.80       13.78 o   0.7070E-02
  -5  23   1        0.04        0.00        3.18 o   0.7570E-02
  -4  23   1       -1.68        9.43        7.74 o   0.6968E-02
  -3  23   1       93.03      103.21       13.43 o   0.1319E-02
  -2  23   1       65.39       53.75        8.85 o   0.2392E-02
   0  23   1        6.03        7.47        6.10 o   0.7488E-02
   1  23   1     1435.01     1446.46       71.58 o   0.2832E-04
   2  23   1        0.69        0.88        2.14 o   0.7447E-02
   3  23   1       28.92       22.76        9.63 o   0.2534E-02
   4  23   1       22.19        7.76       11.71 o   0.6637E-02
   5  23   1       30.42        0.49       14.26 o   0.6099E-02
  -5  24   1       40.05       29.05       15.73 o   0.3927E-02
  -4  24   1        1.80        1.00        8.54 o   0.7533E-02
  -3  24   1      185.01      206.19       17.59 o   0.3302E-03
  -2  24   1       80.51       86.64        9.82 o   0.1325E-02
  -1  24   1      101.36       89.02       10.01 o   0.9352E-03
   0  24   1       -2.22        2.08        3.71 o   0.7567E-02
   1  24   1      254.76      266.58       20.64 o   0.4982E-03
   2  24   1       75.42       76.51       11.23 o   0.1364E-02
   4  24   1        0.07        0.00        2.54 o   0.7562E-02
   5  24   1       17.88       17.83       13.88 o   0.6537E-02
  -5  25   1       22.09        6.50       14.96 o   0.6578E-02
  -4  25   1        3.28        0.38       11.16 o   0.7562E-02
  -3  25   1      633.19      733.09       42.54 o   0.7222E-04
  -2  25   1       20.62       24.57        7.22 o   0.3021E-02
  -1  25   1      485.61      483.10       26.30 o   0.1962E-03
   0  25   1       -1.97        0.10        4.88 o   0.7575E-02
   1  25   1      255.61      218.39       27.03 o   0.3639E-03
   2  25   1       77.69       62.33       11.40 o   0.1904E-02
   3  25   1      515.46      563.31       40.64 o   0.1013E-03
   4  25   1        0.37        0.35        2.54 o   0.7544E-02
   5  25   1       -2.50        5.30        8.50 o   0.7193E-02
   6  25   1       30.47        0.99       29.09 o   0.6171E-02
  -5  26   1       23.22        8.19       13.90 o   0.6351E-02
  -4  26   1       -0.28        0.14        3.18 o   0.7506E-02
  -2  26   1       18.39        7.74       19.19 o   0.7117E-02
  -1  26   1      138.53      114.22       10.53 o   0.1172E-02
   0  26   1       -0.69        0.14        1.39 o   0.7555E-02
   1  26   1       26.04       21.50        7.61 o   0.2320E-02
   2  26   1        5.90        0.48        5.80 o   0.6091E-02
   3  26   1       18.97       18.47        6.50 o   0.3633E-03
   4  26   1       -0.24        4.35        2.98 o   0.7360E-02
   5  26   1       25.08       18.23       15.44 o   0.7139E-02
  -5  27   1       -3.91        0.68       13.38 o   0.7541E-02
  -4  27   1        0.88        2.25        3.13 o   0.7468E-02
  -3  27   1      406.95      330.98       68.21 o   0.7185E-04
  -2  27   1       33.82        6.40        9.83 o   0.6158E-02
  -1  27   1        7.72        5.71        4.97 o   0.3242E-02
   0  27   1        9.69        0.09        9.29 o   0.6949E-02
   1  27   1      100.50      117.99        9.97 o   0.1131E-02
   2  27   1        0.80        0.02        1.39 o   0.4314E-02
   3  27   1     1741.04     1883.01      124.49 o   0.1602E-04
   4  27   1        1.79        0.09        7.18 o   0.6866E-02
   5  27   1        3.82        0.53       12.45 o   0.7535E-02
  -5  28   1       23.14       14.26       16.27 o   0.7024E-02
  -4  28   1        0.83        0.32        3.43 o   0.7530E-02
  -2  28   1        9.29        2.35        4.85 o   0.6375E-02
  -1  28   1       30.57       31.23        8.25 o   0.4991E-02
   0  28   1       11.10        0.18       10.60 o   0.6858E-02
   1  28   1        4.74        3.57        9.31 o   0.7365E-02
   2  28   1       30.06       21.13       14.72 o   0.7191E-02
   3  28   1        6.63        6.71        4.61 o   0.2066E-02
   4  28   1        2.85        0.48        9.07 o   0.7508E-02
   5  28   1        8.36       11.11       16.10 o   0.7315E-02
  -5  29   1       -2.90        0.74       16.43 o   0.7357E-02
  -4  29   1      -13.61        0.53       24.58 o   0.6887E-02
  -3  29   1      119.97      135.47       19.61 o   0.1048E-02
  -2  29   1       20.92       11.31       22.75 o   0.7186E-02
  -1  29   1      317.34      359.96       17.72 o   0.2879E-03
   0  29   1       -2.92        1.20        5.44 o   0.7460E-02
   1  29   1      167.29      187.05       18.01 o   0.5008E-03
   2  29   1        0.01        0.01        2.49 o   0.7386E-02
   3  29   1       25.23       29.32        9.49 o   0.1961E-02
   4  29   1        2.07        0.04        7.58 o   0.7084E-02
   5  29   1       26.77       11.54       14.41 o   0.6870E-02
  -5  30   1       -4.80        3.74       22.00 o   0.7232E-02
  -4  30   1       -3.82        6.37       13.40 o   0.7299E-02
  -3  30   1      626.83      616.29       72.21 o   0.1185E-03
  -2  30   1       -2.49        9.60        9.10 o   0.7133E-02
  -1  30   1      308.11      277.48       27.93 o   0.5383E-03
   0  30   1        1.20        4.12        3.49 o   0.7337E-02
   1  30   1        0.00        0.00        0.90 o   0.1826E-02
   2  30   1        1.54        0.57        6.16 o   0.7260E-02
   3  30   1      358.44      341.44       30.13 o   0.2131E-03
   4  30   1        2.76        0.82        8.76 o   0.7217E-02
   5  30   1        3.71        8.80       19.53 o   0.7044E-02
  -4  31   1       -1.98        0.30       10.08 o   0.7525E-02
  -3  31   1       71.37       54.72       23.53 o   0.1173E-02
  -2  31   1       -8.53        0.97       13.94 o   0.7098E-02
  -1  31   1       65.34       64.60        8.04 o   0.1026E-02
   0  31   1        1.85        0.14        4.60 o   0.7575E-02
   2  31   1       12.18        0.76       18.40 o   0.6778E-02
   3  31   1      224.62      219.14       20.87 o   0.6791E-03
   4  31   1       -7.18        2.08       15.99 o   0.7445E-02
  -4  32   1       -2.50        0.15       11.63 o   0.7566E-02
  -3  32   1        0.09        0.06        1.39 o   0.6126E-02
  -2  32   1       -1.79        1.19        6.26 o   0.7530E-02
  -1  32   1      445.71      452.46       29.39 o   0.1106E-03
   0  32   1        3.55        7.51        6.56 o   0.7279E-02
   2  32   1      -12.38        0.67       17.50 o   0.6680E-02
   3  32   1      110.06       97.11       16.69 o   0.1461E-02
   4  32   1      -23.69        0.99       12.10 o   0.6384E-02
  -4  33   1       -0.09        0.04        3.73 o   0.7537E-02
  -3  33   1      164.01      134.50       21.65 o   0.1033E-02
  -2  33   1       -3.73        0.60        9.22 o   0.7524E-02
  -1  33   1      659.04      637.03       35.74 o   0.1098E-03
   0  33   1        7.15        0.40        9.84 o   0.7133E-02
   1  33   1      390.75      373.79       39.32 o   0.1904E-03
   2  33   1      -12.75        0.71       18.11 o   0.6821E-02
   3  33   1       30.49       27.56       10.43 o   0.2072E-02
   4  33   1       -1.79        1.40        6.92 o   0.7478E-02
   5  33   1       -3.79       17.18       20.14 o   0.6359E-02
  -5  34   1      141.44       96.54       34.30 o   0.1074E-02
  -4  34   1        0.04        0.00        5.77 o   0.7551E-02
  -3  34   1       13.28        5.45       26.09 o   0.7073E-02
  -2  34   1      -22.36        1.32       22.10 o   0.6517E-02
  -1  34   1      517.09      559.22       29.40 o   0.1777E-03
   0  34   1        7.15        8.36        9.84 o   0.7415E-02
   2  34   1        2.64        0.09        8.39 o   0.6895E-02
   3  34   1       18.78        5.38       29.31 o   0.6645E-02
   4  34   1      -12.82        1.95       22.79 o   0.7008E-02
   5  34   1      114.22       89.24       32.95 o   0.1183E-02
  -5  35   1        2.97        0.29       20.91 o   0.7507E-02
  -4  35   1        0.39        0.11        5.67 o   0.7532E-02
  -3  35   1        6.48        6.66       18.47 o   0.6887E-02
  -2  35   1       -3.95        0.06       12.65 o   0.6390E-02
  -1  35   1        0.00        0.00        0.90 o   0.1795E-02
   0  35   1       45.58       31.73        9.40 o   0.3208E-02
   1  35   1      292.60      269.18       28.92 o   0.5534E-03
   2  35   1       -4.71        1.02       10.79 o   0.7526E-02
   3  35   1       19.22       21.50       26.16 o   0.7171E-02
   4  35   1       -3.04        0.58       10.92 o   0.7482E-02
   5  35   1       -1.39        3.77       13.26 o   0.7368E-02
  -4  36   1        0.40        0.09        5.72 o   0.7527E-02
  -3  36   1        0.79        0.09        1.59 o   0.5971E-02
  -2  36   1       -0.26        0.00        3.28 o   0.6702E-02
  -1  36   1       34.32       33.65       11.07 o   0.2273E-02
   0  36   1       34.51       26.44        9.93 o   0.4002E-02
   1  36   1      102.40       91.11       14.09 o   0.1413E-02
   2  36   1       -0.56        0.20        2.59 o   0.7564E-02
   3  36   1       15.40       13.79       22.25 o   0.7520E-02
   4  36   1       -4.12        2.91       11.51 o   0.7413E-02
  -4  37   1       -1.42        1.41       13.77 o   0.7468E-02
  -3  37   1       62.37       54.23       19.64 o   0.2263E-02
  -2  37   1      -14.81        1.25       24.11 o   0.6587E-02
  -1  37   1       83.43       77.11       12.72 o   0.1566E-02
   0  37   1       21.19        2.89        9.61 o   0.6389E-02
   1  37   1       37.90       43.56       11.02 o   0.1976E-02
   2  37   1       14.17        2.07       20.59 o   0.6864E-02
   3  37   1       11.78       10.09        9.22 o   0.6758E-02
   4  37   1        0.00        0.00        2.93 o   0.7541E-02
  -4  38   1       -2.38       10.65       12.26 o   0.7030E-02
  -3  38   1        0.50        0.08        1.39 o   0.5486E-02
  -2  38   1        1.35        0.64        7.74 o   0.7446E-02
  -1  38   1       66.49       57.86       11.35 o   0.1424E-02
   0  38   1       19.22       10.99       19.18 o   0.6978E-02
   1  38   1      155.34      151.64       16.11 o   0.9721E-03
   2  38   1      -10.05        4.64       17.02 o   0.7302E-02
   3  38   1       13.90       29.07       27.81 o   0.5150E-02
   4  38   1       -0.02        0.00        3.38 o   0.6514E-02
  -4  39   1       23.12        3.26       58.34 o   0.7388E-02
  -3  39   1       14.67       10.22       30.47 o   0.7227E-02
  -2  39   1       -5.40        0.68       14.78 o   0.7520E-02
  -1  39   1       45.70       43.56       10.76 o   0.1910E-02
   0  39   1       47.98       38.95       10.33 o   0.2674E-02
   1  39   1      101.26       96.98       14.01 o   0.1371E-02
   2  39   1       12.07        0.57       20.04 o   0.6809E-02
   3  39   1      -12.81        9.84       24.92 o   0.7336E-02
  -3  40   1        8.74        1.57       16.47 o   0.6533E-02
  -2  40   1        7.65        0.40       13.20 o   0.6151E-02
  -1  40   1      226.00      261.73       19.44 o   0.4821E-03
   0  40   1        1.85        3.50        5.68 o   0.7301E-02
   1  40   1       99.46       97.14       16.86 o   0.9428E-03
   2  40   1       27.53        4.02       18.26 o   0.6329E-02
   3  40   1      -14.03       10.04       24.96 o   0.7311E-02
  -3  41   1       44.03       35.65       20.46 o   0.3848E-02
  -2  41   1        9.75        4.58       21.43 o   0.7295E-02
  -1  41   1       22.02       21.76        8.40 o   0.2696E-02
   0  41   1        1.85        0.77        5.81 o   0.7544E-02
   1  41   1      115.96      103.35       19.28 o   0.1314E-02
   2  41   1        1.40        0.10        8.37 o   0.6692E-02
   3  41   1       -2.59        1.03        5.12 o   0.6705E-02
  -3  42   1       -0.21        0.81        5.62 o   0.7087E-02
  -2  42   1        2.69       11.22       16.97 o   0.6986E-02
  -1  42   1       15.28       17.66       21.00 o   0.7438E-02
   0  42   1        2.63        5.64        7.58 o   0.7159E-02
   1  42   1        4.20        3.78       10.80 o   0.7516E-02
   2  42   1       -0.01        0.01        3.58 o   0.7411E-02
   3  42   1       28.63       31.61       14.90 o   0.4583E-02
  -3  43   1        4.49       24.54       25.30 o   0.4960E-02
  -2  43   1       15.28       16.34       27.21 o   0.7517E-02
  -1  43   1       11.53        9.02       18.91 o   0.7360E-02
   0  43   1       13.88        4.78       18.90 o   0.6973E-02
   1  43   1       18.82       13.92       28.04 o   0.7211E-02
   2  43   1        7.91       19.40       20.97 o   0.6196E-02
   3  43   1       11.91       14.07       21.62 o   0.7445E-02
  -3  44   1        0.00        0.00        6.07 o   0.7474E-02
  -2  44   1       -5.92        1.33       25.65 o   0.7401E-02
  -1  44   1       -3.28        1.08       10.09 o   0.7530E-02
   0  44   1        1.40        1.73        5.89 o   0.7457E-02
   1  44   1        8.89        0.55       16.01 o   0.6912E-02
   2  44   1        4.33        6.83       15.52 o   0.7172E-02
   3  44   1       14.66        7.67       24.37 o   0.7192E-02
  -3  45   1       -1.19        0.68       13.47 o   0.7547E-02
  -2  45   1        3.00        0.55        6.03 o   0.6442E-02
  -1  45   1      -11.42        0.67       23.53 o   0.6724E-02
   0  45   1       -5.81        2.15       12.71 o   0.7319E-02
   1  45   1        0.78        1.32        2.88 o   0.7516E-02
   2  45   1        0.00       15.61        3.78 o   0.6803E-02
   3  45   1        0.11        0.01        4.33 o   0.7568E-02
  -2  46   1       62.22       46.81       27.46 o   0.2321E-02
  -1  46   1       10.58        1.79       26.53 o   0.7448E-02
   0  46   1       -0.56        0.40        2.59 o   0.7536E-02
   1  46   1        0.32        0.70        2.83 o   0.7500E-02
   2  46   1       26.46       26.45       17.39 o   0.3650E-02
   3  46   1      -19.37        0.64       36.77 o   0.6612E-02
  -2  47   1        1.80        0.34       10.68 o   0.6614E-02
   0  47   1        5.20        3.10       12.02 o   0.7346E-02
   1  47   1       -0.96        0.03        3.43 o   0.6891E-02
   2  47   1       33.63       14.79       24.80 o   0.6689E-02
  -1  48   1       -1.35        2.09        9.47 o   0.7452E-02
   0  48   1       -7.39        0.00       15.14 o   0.7092E-02
   1  48   1       -7.24        0.41       20.87 o   0.6741E-02
   2  48   1       -6.51       19.62       25.62 o   0.6458E-02
  -2  49   1       51.43       16.10       27.10 o   0.5736E-02
  -1  49   1       19.89        8.98       36.37 o   0.7008E-02
   1  49   1        2.12        1.63        9.56 o   0.7361E-02
   2  49   1       14.98        5.40       19.63 o   0.6665E-02
   0  50   1        5.81        2.10       22.54 o   0.7426E-02
   1  50   1       82.39       48.61       26.18 o   0.2249E-02
  -5   0   2       -0.07        0.21        4.43 o   0.7022E-02
  -4   0   2      260.64      294.74       17.66 o   0.4616E-03
  -3   0   2       60.89       47.27        9.31 o   0.2701E-02
  -2   0   2      857.41      854.44       49.51 o   0.8092E-04
   0   0   2    18432.70    19847.03     1417.73 o   0.3104E-06
   3   0   2        5.43        8.67       14.13 o   0.7106E-02
   4   0   2        6.17        2.11        3.95 o   0.8868E-03
   5   0   2       57.79       38.01       21.92 o   0.3376E-02
   6   0   2      246.91      227.88       39.07 o   0.6723E-03
  -5   1   2       47.52       52.45       13.03 o   0.2643E-02
  -4   1   2      142.56      122.69        9.50 o   0.8071E-03
  -3   1   2        0.08        0.18        1.14 o   0.7302E-02
  -2   1   2       17.22       14.18        3.30 o   0.1096E-02
  -1   1   2       29.34       36.94        5.93 o   0.3420E-02
   0   1   2    13864.95    14878.20      749.46 o   0.4531E-06
   1   1   2       11.40        7.36        5.04 o   0.7076E-02
   3   1   2       37.97       35.89        8.58 o   0.4103E-02
   5   1   2        0.05        0.96        2.78 o   0.6833E-02
  -5   2   2        9.93        5.73       18.80 o   0.7189E-02
  -4   2   2      102.91       93.99        9.08 o   0.6319E-03
  -3   2   2       16.58        6.24       10.53 o   0.7096E-02
  -2   2   2      141.46       99.61        9.46 o   0.9910E-03
  -1   2   2      176.72      164.10       14.54 o   0.8709E-03
   1   2   2       59.94       82.72        8.47 o   0.1135E-02
   2   2   2      142.49      125.33        9.50 o   0.9982E-03
   3   2   2        0.09        0.60        1.39 o   0.7446E-02
   4   2   2      405.06      524.86       40.03 o   0.1659E-03
   5   2   2       13.61       21.23       20.18 o   0.7064E-02
   6   2   2      115.36       56.99       20.30 o   0.1828E-02
  -5   3   2       -2.11        3.00        9.53 o   0.7369E-02
  -4   3   2      841.77      837.46       34.62 o   0.8575E-04
  -3   3   2        0.17        2.80        1.34 o   0.7390E-02
  -2   3   2       50.19       39.04        5.64 o   0.1497E-02
  -1   3   2      258.74      256.95       17.60 o   0.3394E-03
   0   3   2     1292.21     1602.31      100.10 o   0.1411E-04
   1   3   2      382.45      453.79       27.23 o   0.1830E-03
   2   3   2      145.05      171.09       14.37 o   0.8592E-03
   3   3   2       -1.11        2.04        2.83 o   0.7415E-02
   5   3   2       10.47        5.45       17.37 o   0.7250E-02
   6   3   2      338.50      366.02       31.11 o   0.3550E-03
  -5   4   2       -4.26        6.42       11.29 o   0.7116E-02
  -4   4   2      249.82      223.51       17.29 o   0.4060E-03
  -3   4   2       13.20       10.05       10.12 o   0.7386E-02
  -2   4   2      974.93      976.71       40.37 o   0.6511E-04
  -1   4   2      470.38      446.74       34.51 o   0.1033E-03
   0   4   2      142.18      161.99       13.04 o   0.7593E-03
   1   4   2      912.67     1131.44       60.09 o   0.3603E-04
   3   4   2        2.75        4.91        4.45 o   0.7433E-02
   4   4   2      326.52      406.20       23.36 o   0.2292E-03
   5   4   2       -2.17        7.56        8.05 o   0.7068E-02
   6   4   2      136.55       58.62       31.38 o   0.1684E-02
  -6   5   2      147.21      129.43       36.20 o   0.1134E-02
  -5   5   2        9.49        2.21       14.40 o   0.7119E-02
  -4   5   2        0.91        0.37        0.90 o   0.1020E-02
  -3   5   2       69.04       59.22        8.26 o   0.1682E-02
  -2   5   2       11.67        9.19        4.76 o   0.2408E-03
   0   5   2      276.05      337.56       16.52 o   0.2647E-03
   3   5   2       91.42       74.75        8.56 o   0.1483E-02
   4   5   2      275.74      310.70       19.82 o   0.4251E-03
   5   5   2        6.20        1.85       10.89 o   0.7265E-02
  -5   6   2        5.91        5.02       14.02 o   0.7489E-02
  -4   6   2       64.79       57.66       10.41 o   0.1917E-02
  -3   6   2      360.10      376.28       18.87 o   0.3325E-03
  -2   6   2      645.00      608.00       37.89 o   0.8921E-04
  -1   6   2      211.26      194.00       17.35 o   0.4359E-03
   0   6   2       77.64       65.25        6.13 o   0.1648E-02
   1   6   2      414.27      467.09       20.24 o   0.1983E-03
   2   6   2      708.80      728.70       39.72 o   0.7743E-04
   4   6   2       34.30       42.09       10.48 o   0.2271E-02
   5   6   2       29.68       17.39       11.92 o   0.6879E-02
   6   6   2       70.62       75.47       23.40 o   0.1891E-02
  -5   7   2       10.32        2.53       16.61 o   0.7151E-02
  -4   7   2       32.04       32.05       11.26 o   0.5045E-02
  -3   7   2       97.65      100.51        9.83 o   0.9039E-03
  -2   7   2     1707.16     1716.30      115.05 o   0.2177E-04
  -1   7   2      374.19      417.38       19.24 o   0.2214E-03
   0   7   2      101.66      112.05        7.02 o   0.1088E-02
   1   7   2      233.67      241.19       16.72 o   0.3806E-03
   3   7   2      272.85      277.58       21.36 o   0.5008E-03
   4   7   2        1.97        2.30        6.42 o   0.7560E-02
   5   7   2        1.45        0.39        5.39 o   0.7531E-02
   6   7   2       40.51       21.73       17.09 o   0.6705E-02
  -6   8   2       -3.39        5.13       12.81 o   0.7358E-02
  -5   8   2        6.52        3.12       12.70 o   0.7366E-02
  -4   8   2       54.63       49.29       11.03 o   0.2415E-02
  -3   8   2       35.01       38.23        7.06 o   0.6544E-03
  -2   8   2       54.16       52.11        7.32 o   0.6847E-03
  -1   8   2        0.04        0.03        0.70 o   0.1659E-02
   0   8   2       65.06       65.00        5.62 o   0.1705E-02
   1   8   2      251.61      292.00       18.93 o   0.4867E-03
   3   8   2      611.33      720.02       44.26 o   0.1042E-03
   4   8   2       20.55       15.02        8.57 o   0.5057E-02
   5   8   2        5.74        3.49       11.20 o   0.7464E-02
   6   8   2        1.94        1.41       13.43 o   0.7487E-02
  -5   9   2        6.52        0.31       13.20 o   0.7222E-02
  -4   9   2       -0.25        0.34        2.09 o   0.7470E-02
  -3   9   2     1118.76     1218.74       49.90 o   0.3895E-04
  -2   9   2       97.89      102.66        8.86 o   0.1165E-02
  -1   9   2      150.54      195.12       23.18 o   0.7116E-03
   0   9   2       11.39        4.27        5.71 o   0.7075E-02
   2   9   2      122.21      120.43        8.80 o   0.1066E-02
   4   9   2       12.30        7.40       15.70 o   0.7299E-02
   5   9   2       -3.77        0.11        8.49 o   0.7241E-02
  -6  10   2       11.77        0.01       35.83 o   0.7576E-02
  -5  10   2       17.98       11.70       26.57 o   0.7200E-02
  -4  10   2       -0.47        0.03        2.04 o   0.7571E-02
  -3  10   2       35.30       39.64        5.32 o   0.9443E-03
  -2  10   2       14.52       14.34        4.17 o   0.6327E-03
  -1  10   2       37.45       34.89        5.48 o   0.1860E-02
   0  10   2        9.42        5.76        4.58 o   0.7410E-02
   1  10   2      103.35      132.92        7.08 o   0.1015E-02
   4  10   2       -4.10        0.52        9.26 o   0.7560E-02
   5  10   2       12.32        8.77       16.76 o   0.7351E-02
   6  10   2       13.91        5.28       31.53 o   0.7266E-02
  -6  11   2       14.66        3.88       41.12 o   0.7377E-02
  -5  11   2       21.08        9.03       23.29 o   0.6934E-02
  -4  11   2       -3.02        0.50        6.91 o   0.7344E-02
  -3  11   2        1.20        1.27        1.42 o   0.2303E-02
  -2  11   2      761.77      772.22       32.94 o   0.1035E-03
  -1  11   2      300.82      335.12       18.97 o   0.2731E-03
   0  11   2       27.67       33.48        3.66 o   0.2945E-02
   1  11   2      367.78      345.46       22.89 o   0.2746E-03
   4  11   2       -0.57        1.27        2.39 o   0.7531E-02
   5  11   2        4.15        4.71        9.93 o   0.7496E-02
  -5  12   2       -1.35        3.29        5.78 o   0.7343E-02
  -4  12   2       36.17       29.74       10.17 o   0.4457E-02
  -3  12   2      218.16      208.75       16.16 o   0.5704E-03
  -2  12   2      341.60      374.41       16.54 o   0.2688E-03
  -1  12   2       93.41       89.14        8.65 o   0.5534E-03
   0  12   2       16.98       18.15        6.56 o   0.7503E-02
   2  12   2      245.56      267.67       20.26 o   0.3552E-03
   3  12   2      210.59      214.74       18.76 o   0.5574E-03
   4  12   2        8.21        5.32       14.54 o   0.7211E-02
   5  12   2       19.11        2.72       10.43 o   0.6459E-02
  -5  13   2        0.01        0.01        2.34 o   0.7505E-02
  -4  13   2        0.48        0.61        1.94 o   0.7483E-02
  -3  13   2      116.08      127.12       11.79 o   0.1214E-02
  -2  13   2        8.81        8.16        2.66 o   0.1625E-02
  -1  13   2     1271.95     1524.37       70.94 o   0.2290E-04
   0  13   2        3.07        2.97        2.62 o   0.7538E-02
   4  13   2       52.49       43.28       12.97 o   0.3207E-02
   5  13   2       16.21        4.64       19.22 o   0.6993E-02
   6  13   2      -16.63        0.80       32.85 o   0.6777E-02
  -6  14   2        1.09        1.19        7.17 o   0.7524E-02
  -5  14   2       25.83       20.30       12.64 o   0.7327E-02
  -4  14   2       16.00        9.70       16.71 o   0.7131E-02
  -3  14   2       51.91       44.34        8.60 o   0.2967E-02
  -2  14   2       15.96       13.57        8.74 o   0.7376E-02
  -1  14   2     1633.95     1792.68       80.40 o   0.1398E-04
   0  14   2        2.63        3.16        2.90 o   0.7537E-02
   1  14   2     1228.41     1242.56       76.68 o   0.2170E-04
   2  14   2       12.36        9.45       10.84 o   0.7315E-02
   3  14   2        2.97        8.90        7.20 o   0.6897E-02
   4  14   2       31.22       17.41       11.67 o   0.6869E-02
   5  14   2        1.92        3.91        6.62 o   0.7118E-02
   6  14   2       13.18        1.09       19.86 o   0.6974E-02
  -6  15   2      -17.03        0.30       27.09 o   0.6745E-02
  -5  15   2       28.73       34.29       10.66 o   0.2219E-02
  -4  15   2        7.18       10.00       10.39 o   0.7460E-02
  -3  15   2        0.01        1.62        1.64 o   0.6781E-02
  -2  15   2        9.89       10.50        7.19 o   0.7507E-02
  -1  15   2       15.08       20.54        5.41 o   0.2647E-03
   0  15   2       38.21       35.41        4.92 o   0.3025E-02
   1  15   2     1588.07     1485.09       87.19 o   0.2842E-04
   2  15   2        1.13        0.88        3.39 o   0.7525E-02
   3  15   2       58.13       53.33       11.37 o   0.2506E-02
   4  15   2        0.24        0.16        2.34 o   0.7415E-02
   5  15   2       72.26       73.65       13.53 o   0.1665E-02
   6  15   2       29.92        0.50       17.41 o   0.6125E-02
  -6  16   2       19.59        1.47       31.25 o   0.6649E-02
  -5  16   2      132.64      127.26       16.04 o   0.1020E-02
  -4  16   2       -0.58        1.03        1.89 o   0.7489E-02
  -3  16   2        4.67        2.05        7.31 o   0.7206E-02
  -2  16   2       -2.15        0.87        3.79 o   0.7499E-02
  -1  16   2      167.25      200.42       14.15 o   0.3471E-03
   0  16   2       24.98       20.78        4.97 o   0.5643E-02
   1  16   2      723.66      633.11       42.81 o   0.1186E-03
   2  16   2        2.27        0.11        5.10 o   0.7210E-02
   3  16   2        6.53        9.34       11.19 o   0.7436E-02
   4  16   2       -7.97        2.52       13.19 o   0.7250E-02
   5  16   2       92.96       98.44       14.38 o   0.1161E-02
   6  16   2      -22.79        1.99       30.38 o   0.6531E-02
  -6  17   2       -3.20        6.13       16.20 o   0.7288E-02
  -5  17   2       31.31       30.44       11.69 o   0.3775E-02
  -4  17   2       -0.20        0.98        1.84 o   0.7507E-02
  -3  17   2       20.81        4.24       18.60 o   0.6693E-02
  -2  17   2        2.65        0.68        4.53 o   0.7352E-02
  -1  17   2      476.97      559.75       34.75 o   0.1756E-03
   0  17   2      622.20      612.51       34.73 o   0.1003E-03
   1  17   2        6.06        7.07        2.20 o   0.9680E-03
   2  17   2        4.31        3.17        6.60 o   0.7540E-02
   3  17   2        0.23        0.08        2.19 o   0.7524E-02
   4  17   2        0.06        0.01        2.39 o   0.7555E-02
   5  17   2       25.05       24.85       11.45 o   0.4497E-02
   6  17   2       16.63        5.08       23.11 o   0.6963E-02
  -5  18   2        9.56       30.54       15.68 o   0.3668E-02
  -4  18   2        8.32        4.26       10.61 o   0.7365E-02
  -3  18   2       10.00        3.99       13.21 o   0.7272E-02
  -2  18   2       20.85       17.83       13.17 o   0.7416E-02
  -1  18   2       68.76       62.03        6.60 o   0.1971E-02
   0  18   2     1041.03     1127.00       57.76 o   0.2962E-04
   1  18   2       19.51       16.52        4.83 o   0.4195E-02
   2  18   2       -0.17        1.59        1.69 o   0.7252E-02
   3  18   2       -0.44        0.18        1.99 o   0.7492E-02
   4  18   2        0.00        0.00        2.39 o   0.7262E-02
   5  18   2       20.87       13.47        9.09 o   0.6911E-02
   6  18   2        1.55       22.40        8.28 o   0.6437E-02
  -5  19   2       62.31       67.05       12.56 o   0.1350E-02
  -4  19   2       -3.23        9.99        7.86 o   0.7038E-02
  -3  19   2        0.01        0.01        1.99 o   0.7431E-02
  -2  19   2        2.59        3.07        4.80 o   0.7540E-02
  -1  19   2      130.69      144.24        9.10 o   0.8451E-03
   0  19   2      537.80      581.88       29.98 o   0.1081E-03
   1  19   2      126.95      130.54        8.96 o   0.9512E-03
   2  19   2       10.32        8.20       11.18 o   0.7416E-02
   3  19   2       41.78       34.09       10.93 o   0.3929E-02
   4  19   2       -1.63        7.84        5.46 o   0.7058E-02
   5  19   2      142.62      141.09       16.63 o   0.9999E-03
   6  19   2       26.74        6.43       17.49 o   0.6634E-02
  -5  20   2      194.36      206.25       18.02 o   0.6705E-03
  -4  20   2        1.51        1.91        5.74 o   0.5559E-02
  -3  20   2       26.46       15.70       10.74 o   0.6889E-02
  -2  20   2        2.99        0.71        5.16 o   0.7345E-02
   0  20   2       33.99       32.69        5.80 o   0.3255E-02
   1  20   2        7.73        7.93        2.21 o   0.1675E-02
   2  20   2        4.67        2.85        7.52 o   0.7519E-02
   3  20   2        0.18        0.59        2.14 o   0.7348E-02
   4  20   2       71.05       94.25       12.57 o   0.1395E-02
   5  20   2      112.25      120.88       13.70 o   0.8897E-03
   6  20   2       14.66        5.92       28.18 o   0.7083E-02
  -5  21   2       26.43       28.42       10.23 o   0.2885E-02
  -4  21   2       81.25      102.28       12.55 o   0.1314E-02
  -3  21   2        4.06        1.03        8.81 o   0.7272E-02
  -2  21   2        0.57        1.19        1.94 o   0.7320E-02
  -1  21   2      183.34      176.46       16.16 o   0.5614E-03
   0  21   2      404.89      506.59       24.01 o   0.1289E-03
   1  21   2      343.56      361.18       22.12 o   0.3108E-03
   2  21   2       11.14       13.09       12.28 o   0.7475E-02
   3  21   2       -4.26        4.03        8.62 o   0.7567E-02
   4  21   2       10.80       14.84        6.86 o   0.3141E-02
   5  21   2       78.80       67.37       17.66 o   0.1705E-02
   6  21   2       54.89       57.75       14.00 o   0.2228E-02
  -5  22   2       22.33        7.25       12.22 o   0.6665E-02
  -4  22   2      112.52      150.67       18.99 o   0.8982E-03
  -3  22   2       -3.13        5.14        8.09 o   0.7331E-02
  -2  22   2      154.95      142.59       14.86 o   0.1075E-02
  -1  22   2      220.20      240.89       22.14 o   0.2843E-03
   0  22   2       92.17       92.18        8.59 o   0.1306E-02
   1  22   2      677.66      692.29       41.42 o   0.1054E-03
   2  22   2        9.61       10.67        6.16 o   0.2894E-02
   3  22   2       -1.99        1.48        5.88 o   0.7437E-02
   4  22   2       35.71       38.54        8.91 o   0.1696E-02
   5  22   2        4.51        3.84       11.82 o   0.7279E-02
   6  22   2       20.48       26.64       47.70 o   0.4493E-02
  -5  23   2        4.92        0.36       11.25 o   0.7053E-02
  -4  23   2       55.33       43.68       21.45 o   0.1413E-02
  -3  23   2        6.79        3.70        5.18 o   0.6701E-02
  -2  23   2        1.00        0.73        2.39 o   0.1423E-02
  -1  23   2      378.01      428.08       29.00 o   0.2818E-03
   0  23   2        8.12        8.57        7.37 o   0.7492E-02
   1  23   2        0.03        0.04        0.60 o   0.1288E-02
   2  23   2      280.62      311.13       26.66 o   0.4224E-03
   3  23   2       68.59       60.46       12.35 o   0.2114E-02
   4  23   2      190.44      180.20       16.47 o   0.8390E-03
   5  23   2        8.64        1.58       14.32 o   0.7240E-02
   6  23   2      -16.63        1.22       37.71 o   0.7523E-02
  -5  24   2        7.59        1.66       16.44 o   0.7052E-02
  -4  24   2       31.33       27.06       13.92 o   0.2716E-02
  -3  24   2      135.84       78.79       15.07 o   0.1417E-02
  -2  24   2       74.73       62.11       12.04 o   0.1055E-02
  -1  24   2       54.44       53.67        7.34 o   0.1588E-02
   0  24   2       -5.81        1.13        6.47 o   0.7315E-02
   1  24   2      130.45      119.75       20.45 o   0.1127E-02
   2  24   2      226.09      275.50       23.93 o   0.4513E-03
   3  24   2        1.83        1.45        3.50 o   0.7231E-02
   4  24   2       79.87       73.23       13.33 o   0.1747E-02
   5  24   2        5.79        4.26       13.16 o   0.7331E-02
  -5  25   2       15.00        4.27       20.41 o   0.6841E-02
  -4  25   2       58.70       59.22       16.76 o   0.2019E-02
  -3  25   2       34.95       29.78       11.17 o   0.2332E-02
  -2  25   2      601.52      601.57       46.34 o   0.1518E-03
  -1  25   2       25.50       23.26        6.53 o   0.3685E-02
   0  25   2       80.76       92.27        8.04 o   0.1249E-02
   1  25   2       62.85       53.89       10.25 o   0.2178E-02
   2  25   2       65.79       84.00       12.10 o   0.5859E-03
   3  25   2      114.48       91.38       14.90 o   0.1365E-02
   4  25   2       11.96       10.65        7.57 o   0.5622E-02
   5  25   2       -4.58        4.99       10.42 o   0.7257E-02
  -5  26   2       19.80        6.31       12.39 o   0.6766E-02
  -4  26   2       20.54       11.01       13.07 o   0.6785E-02
  -3  26   2       60.50       52.36       16.24 o   0.1871E-02
  -2  26   2       69.60       51.60       21.57 o   0.1570E-02
  -1  26   2       12.68        8.81       11.33 o   0.7179E-02
   0  26   2       75.34      108.47        8.63 o   0.9923E-03
   1  26   2       22.79       16.73        9.02 o   0.7166E-02
   2  26   2      129.63      102.03       14.72 o   0.1206E-02
   3  26   2      108.45       72.82       14.50 o   0.1432E-02
   4  26   2       27.39       23.82       13.01 o   0.5956E-02
   5  26   2       10.99        6.02       33.29 o   0.7163E-02
  -5  27   2        0.48        0.52        2.93 o   0.7540E-02
  -4  27   2       -8.96        4.89       19.35 o   0.7271E-02
  -3  27   2       85.06       79.85       18.34 o   0.1651E-02
  -2  27   2      300.01      312.23       25.84 o   0.4688E-03
  -1  27   2       51.97       35.05        8.60 o   0.4518E-02
   0  27   2       10.24       20.98        9.87 o   0.6278E-02
   1  27   2        0.10        0.03        0.94 o   0.6511E-02
   2  27   2        3.57        4.22        3.38 o   0.1539E-02
   3  27   2       11.78        7.63        6.83 o   0.4700E-02
   4  27   2        1.14        1.03        6.16 o   0.7458E-02
   5  27   2        0.06        0.03        2.73 o   0.7565E-02
  -5  28   2       -0.66        0.08        2.93 o   0.7551E-02
  -4  28   2        5.46       16.29       16.50 o   0.6673E-02
  -3  28   2        8.64       21.47       20.17 o   0.4968E-02
  -2  28   2       45.58       57.40       14.10 o   0.2703E-03
  -1  28   2        3.63        2.89        6.25 o   0.7375E-02
   0  28   2       -3.55        0.13        5.81 o   0.7346E-02
   1  28   2       35.02       49.30       10.59 o   0.2379E-02
   2  28   2     1392.51     1351.92      100.20 o   0.3411E-04
   3  28   2       47.98       24.23       12.40 o   0.4157E-02
   4  28   2        0.03        0.02        2.83 o   0.7389E-02
   5  28   2       -3.35        2.09       12.19 o   0.7492E-02
  -4  29   2       -0.13        0.58        3.38 o   0.7322E-02
  -3  29   2        3.13        0.38        3.87 o   0.4772E-02
  -2  29   2     1171.15     1120.56       85.09 o   0.4542E-04
  -1  29   2       16.17       10.28       13.20 o   0.7281E-02
   0  29   2       34.51       28.82        7.59 o   0.3872E-02
   1  29   2        3.86        1.91        8.41 o   0.7311E-02
   2  29   2      121.19      134.97       19.71 o   0.2647E-03
   3  29   2       39.10       27.85       13.68 o   0.5895E-02
   4  29   2       17.65       13.95       29.67 o   0.7428E-02
   5  29   2       -0.07        0.00        4.97 o   0.7566E-02
  -4  30   2      106.12      137.60       20.49 o   0.1022E-02
  -3  30   2       45.48       13.74       17.44 o   0.6025E-02
  -2  30   2      781.39      810.01       58.38 o   0.7989E-04
  -1  30   2        1.51        3.07        4.16 o   0.7287E-02
   0  30   2       82.35       74.71        9.93 o   0.1486E-02
   1  30   2        3.81        6.12        8.55 o   0.7224E-02
   2  30   2      219.11      234.35       26.50 o   0.2672E-03
   3  30   2        1.04        0.27        5.37 o   0.6957E-02
   4  30   2       20.59       22.68        9.48 o   0.2246E-02
   5  30   2       39.30        7.71       18.70 o   0.5961E-02
  -4  31   2       68.77       61.32       18.14 o   0.1449E-02
  -3  31   2        0.57        0.10        1.69 o   0.6480E-02
  -2  31   2       61.46       57.88       17.93 o   0.5558E-03
  -1  31   2        8.64        2.80        9.94 o   0.7284E-02
   0  31   2       59.53       67.95        9.21 o   0.1525E-02
   1  31   2       -1.95        0.30        6.12 o   0.7261E-02
   2  31   2      721.48      764.96       56.10 o   0.9315E-04
   3  31   2       19.55       15.49       23.75 o   0.7420E-02
   4  31   2      103.37      128.52       20.22 o   0.1022E-02
   5  31   2       -1.68        0.23       10.58 o   0.7538E-02
  -4  32   2       43.97       22.08       19.12 o   0.9241E-03
  -3  32   2      -16.62        6.35       26.35 o   0.7009E-02
  -2  32   2      113.37      118.90       18.00 o   0.1197E-02
  -1  32   2       26.20       20.90        9.16 o   0.7312E-02
   0  32   2        4.25        0.48        8.20 o   0.7313E-02
   1  32   2        0.03        0.10        2.29 o   0.7271E-02
   2  32   2       33.68       31.07        9.81 o   0.2107E-02
   3  32   2        1.11        0.55        5.46 o   0.7446E-02
   4  32   2      275.46      326.01       23.11 o   0.3857E-03
   5  32   2       11.52        0.31       32.07 o   0.7532E-02
  -4  33   2      486.66      380.63       61.43 o   0.2759E-03
  -3  33   2        0.15        0.53        3.53 o   0.7332E-02
  -2  33   2        4.48        0.59       13.05 o   0.7065E-02
  -1  33   2       44.53       53.00       11.28 o   0.2176E-02
   0  33   2        2.22        0.03        5.63 o   0.7576E-02
   1  33   2       28.05       25.05        9.48 o   0.3601E-02
   2  33   2        8.76        3.38       15.31 o   0.7284E-02
   3  33   2       14.11       12.61       20.55 o   0.7505E-02
   4  33   2       70.93       87.34       15.91 o   0.7826E-03
   5  33   2        4.30        2.43       15.06 o   0.7448E-02
  -4  34   2       57.77       86.75       25.70 o   0.1124E-02
  -3  34   2        2.71        0.17       11.63 o   0.7564E-02
  -2  34   2       14.08       10.47       23.51 o   0.7255E-02
  -1  34   2        2.30        3.25        7.84 o   0.6797E-02
   0  34   2      156.10      150.88       14.91 o   0.8448E-03
   1  34   2       98.76       80.92       13.84 o   0.1624E-02
   2  34   2       23.08       16.58       11.95 o   0.7133E-02
   3  34   2        4.56        0.99       11.89 o   0.7548E-02
   4  34   2      108.82      117.03       16.60 o   0.1120E-02
   5  34   2        7.57        3.78       20.79 o   0.7213E-02
  -4  35   2        6.60        6.84        8.94 o   0.5251E-02
  -3  35   2       -0.24        0.02        4.87 o   0.7484E-02
  -2  35   2        0.15        0.09        3.18 o   0.7218E-02
  -1  35   2       31.57       46.30       11.18 o   0.2754E-02
   0  35   2      668.98      752.77       43.73 o   0.6363E-04
   1  35   2        0.02        0.01        1.19 o   0.6897E-02
   2  35   2       54.86       37.14       14.73 o   0.3734E-02
   3  35   2       22.77        6.48       32.74 o   0.6751E-02
   4  35   2       66.62       86.29       19.48 o   0.1542E-02
  -4  36   2       80.03       62.34       29.36 o   0.1981E-02
  -3  36   2       -1.93       12.25        9.95 o   0.6883E-02
  -2  36   2       26.10       38.94       15.75 o   0.3232E-02
  -1  36   2       20.74        3.60       20.38 o   0.6628E-02
   0  36   2      280.44      295.07       21.65 o   0.3549E-03
   1  36   2        6.24        1.24       11.93 o   0.7105E-02
   2  36   2        0.50        0.67        2.59 o   0.7415E-02
   3  36   2        5.38        3.30       12.69 o   0.7351E-02
   4  36   2       -0.37        2.64        3.38 o   0.6565E-02
  -4  37   2        0.65       10.24        3.83 o   0.6725E-02
  -3  37   2       -0.11        0.04        3.63 o   0.7460E-02
  -2  37   2        2.91        0.31       10.85 o   0.7538E-02
  -1  37   2        9.05        7.71       13.46 o   0.7407E-02
   0  37   2       73.83       55.63       11.11 o   0.1744E-02
   1  37   2       39.40       28.74       11.86 o   0.5227E-02
   2  37   2       -2.74        2.10        8.89 o   0.7460E-02
   3  37   2        0.63        6.88        3.38 o   0.7169E-02
   4  37   2       25.20       23.78       16.47 o   0.6496E-02
  -3  38   2       -2.47        2.75       11.25 o   0.7418E-02
  -2  38   2        0.00        0.09        3.28 o   0.7555E-02
  -1  38   2       69.08       52.91       12.40 o   0.2194E-02
   0  38   2       15.22       11.75       16.30 o   0.7330E-02
   1  38   2        9.51       13.16       15.34 o   0.5527E-02
   2  38   2       12.46        0.87       18.95 o   0.6980E-02
   3  38   2        5.06        0.24       12.98 o   0.6569E-02
   4  38   2       10.77       33.10       28.40 o   0.3318E-02
  -3  39   2       -3.71        0.10       19.53 o   0.7561E-02
  -2  39   2        4.86        0.41       14.68 o   0.6947E-02
  -1  39   2       45.65       36.06       18.81 o   0.2746E-02
   0  39   2       49.20       59.05       10.46 o   0.1695E-02
   1  39   2       47.89       37.90       12.39 o   0.2617E-02
   2  39   2       19.15        2.54       30.46 o   0.6688E-02
   3  39   2       -3.98        0.64       13.30 o   0.7546E-02
   4  39   2        0.38        1.21        4.18 o   0.7208E-02
  -3  40   2       12.99        8.46       27.24 o   0.7064E-02
  -2  40   2       -0.22        6.69        3.23 o   0.7232E-02
   0  40   2        6.24       11.71       10.93 o   0.7218E-02
   1  40   2      183.84      152.48       21.58 o   0.9344E-03
   2  40   2        1.06        3.33        7.38 o   0.7360E-02
   3  40   2       -1.17        2.09        7.42 o   0.7339E-02
   4  40   2       -1.55        1.49       10.15 o   0.7246E-02
  -3  41   2       -2.23        3.48       11.42 o   0.7136E-02
  -2  41   2        1.06        1.28        7.05 o   0.7461E-02
  -1  41   2       86.56       80.37       22.21 o   0.1690E-02
   0  41   2        9.69        0.65       13.93 o   0.6975E-02
   1  41   2       10.29        8.74        8.61 o   0.4945E-02
   2  41   2        8.24        3.15       21.13 o   0.7407E-02
   3  41   2       16.23       20.22       23.64 o   0.7380E-02
   4  41   2       28.35       11.98       15.89 o   0.6433E-02
  -3  42   2       27.19       51.65       27.49 o   0.2177E-02
  -2  42   2       -0.06        0.12        3.48 o   0.7474E-02
  -1  42   2       53.26       55.33       21.05 o   0.2312E-02
   0  42   2       -0.28        0.72        2.19 o   0.7535E-02
   1  42   2        4.04        3.25       13.40 o   0.7321E-02
   2  42   2       14.59        6.91       22.03 o   0.7189E-02
   3  42   2        0.68        0.44        3.73 o   0.7177E-02
  -3  43   2       78.38       54.50       20.25 o   0.1822E-02
  -2  43   2      -19.06       11.79       13.46 o   0.7070E-02
  -1  43   2        7.73        2.02        9.96 o   0.6330E-02
   0  43   2        4.80        4.58       17.87 o   0.7300E-02
   1  43   2       25.63       24.90       22.66 o   0.7228E-02
   2  43   2       19.33       13.31       32.35 o   0.7187E-02
   3  43   2       42.63       37.95       20.78 o   0.2446E-02
  -3  44   2        0.25        0.69        6.22 o   0.3274E-02
  -2  44   2       -4.78        4.95       20.01 o   0.7309E-02
  -1  44   2      -16.06        0.35       29.89 o   0.6769E-02
   0  44   2       -9.15        0.25       25.57 o   0.7555E-02
   1  44   2        0.28        0.01        4.72 o   0.7573E-02
   2  44   2        0.05        0.02        3.78 o   0.7495E-02
   3  44   2      160.54      132.67       28.98 o   0.1103E-02
  -3  45   2      144.59       82.73       37.07 o   0.1375E-02
  -1  45   2      -17.99        2.20       32.90 o   0.6765E-02
   0  45   2       -1.97        0.84       11.86 o   0.7502E-02
   1  45   2       -5.64        0.49       22.19 o   0.7504E-02
   2  45   2        2.89        4.25       17.93 o   0.7361E-02
   3  45   2        0.07        0.42        4.48 o   0.6415E-02
  -1  46   2       21.37        1.32       38.61 o   0.6576E-02
   0  46   2       -7.63        1.30       21.70 o   0.7491E-02
   1  46   2       -0.11        0.00        3.43 o   0.7555E-02
   2  46   2      -12.79        3.78       37.35 o   0.7298E-02
  -2  47   2       25.47       13.81       25.09 o   0.7007E-02
   0  47   2      -31.00        1.67       16.61 o   0.5739E-02
   1  47   2        8.14        4.91       28.94 o   0.7309E-02
   2  47   2        0.00        1.45        5.42 o   0.7272E-02
  -2  48   2       65.10       18.54       29.69 o   0.5362E-02
   0  48   2      -20.79        1.57       19.50 o   0.6353E-02
   1  48   2       18.87        6.25       47.53 o   0.7252E-02
   2  48   2        3.17        0.59        9.21 o   0.6302E-02
   0  49   2        1.97        0.14       13.67 o   0.7559E-02
   1  49   2       21.31       18.56       51.88 o   0.6545E-02
  -1  50   2       48.46       27.12       27.00 o   0.5225E-02
   0  50   2      -24.98        1.30       20.38 o   0.6092E-02
   1  50   2       -0.02        0.01        5.37 o   0.7172E-02
  -5   1   3      307.95      352.17       45.38 o   0.2584E-03
  -4   1   3        4.27        0.48       10.48 o   0.7535E-02
  -3   1   3       24.12       24.29        9.77 o   0.6423E-02
  -2   1   3        0.48        0.19        1.24 o   0.7446E-02
  -1   1   3      167.80      156.83       15.46 o   0.5435E-03
   0   1   3        4.25        0.86        3.28 o   0.7377E-02
   1   1   3      428.86      423.67       32.95 o   0.2539E-03
   2   1   3        8.80        4.53        6.78 o   0.7343E-02
   3   1   3       10.95       11.03       12.83 o   0.7555E-02
   4   1   3       19.25        0.38       10.04 o   0.6302E-02
   5   1   3      257.02      318.39       28.70 o   0.2730E-03
  -5   2   3       11.59        4.05       13.20 o   0.5321E-02
  -4   2   3       47.74       36.30       15.12 o   0.3344E-02
  -3   2   3        1.94        4.02        5.68 o   0.7284E-02
  -2   2   3        8.03        4.05        7.33 o   0.7228E-02
  -1   2   3      743.15      613.58       43.38 o   0.7643E-04
   0   2   3       28.60       15.96        4.26 o   0.6744E-02
   1   2   3      851.75      831.66       52.24 o   0.6124E-04
   2   2   3        2.39        5.99        4.15 o   0.7363E-02
   3   2   3       11.70        9.14       10.55 o   0.7377E-02
   4   2   3       17.58       17.04        9.17 o   0.7265E-02
   5   2   3       96.36       72.05       16.60 o   0.1756E-02
   6   2   3       23.26       15.18       41.25 o   0.7188E-02
  -5   3   3      229.60      254.72       28.63 o   0.4465E-03
  -4   3   3       25.99       35.22       13.69 o   0.3094E-02
  -3   3   3       19.04       12.48       17.79 o   0.7189E-02
  -2   3   3       -0.07        0.53        1.44 o   0.7465E-02
  -1   3   3     1574.11     1563.85      138.10 o   0.1944E-04
   0   3   3        4.80        2.62        3.71 o   0.7459E-02
   1   3   3      975.40     1015.98       59.01 o   0.3062E-04
   2   3   3       10.55        7.28        7.75 o   0.7351E-02
   3   3   3       15.74        7.48       13.02 o   0.6954E-02
   4   3   3       40.20       29.06       10.09 o   0.3395E-02
   5   3   3      177.93      217.65       31.84 o   0.4711E-03
   6   3   3       13.91        5.02       31.90 o   0.7293E-02
  -5   4   3        0.00        0.22        3.43 o   0.7171E-02
  -4   4   3        5.64        7.32       14.41 o   0.7374E-02
  -3   4   3       19.54       14.60       18.90 o   0.7364E-02
  -2   4   3      143.63      133.71       11.92 o   0.8847E-03
  -1   4   3      343.36      312.46       25.80 o   0.4587E-03
   0   4   3       73.83       69.41        5.98 o   0.1586E-02
   1   4   3        2.16        2.08        1.61 o   0.1592E-02
   2   4   3      143.47      167.63       10.72 o   0.7261E-03
   3   4   3        0.36        0.13        1.59 o   0.7180E-02
   4   4   3       60.44       44.35       11.60 o   0.2697E-02
   5   4   3       37.32       26.69       14.58 o   0.5688E-02
  -5   5   3       10.84        2.35       23.57 o   0.7431E-02
  -4   5   3       91.50       71.91       15.22 o   0.1696E-02
  -3   5   3      188.37      189.80       15.01 o   0.7127E-03
  -2   5   3      124.10      104.31       11.08 o   0.1173E-02
  -1   5   3      394.98      396.69       35.58 o   0.1496E-03
   0   5   3        7.87        6.67        5.30 o   0.7473E-02
   1   5   3      870.26      843.12       64.54 o   0.6907E-04
   2   5   3       61.57       71.31        7.02 o   0.1396E-02
   3   5   3      140.92      141.12       12.99 o   0.8438E-03
   4   5   3       13.04       17.60        7.90 o   0.3607E-02
   5   5   3       -1.24        1.50        6.65 o   0.7429E-02
  -5   6   3       -7.45        0.73       19.82 o   0.7518E-02
  -4   6   3       68.51       72.17       14.82 o   0.1501E-02
  -3   6   3       14.77       11.95        6.11 o   0.3361E-02
  -2   6   3      108.46       81.74       10.36 o   0.1568E-02
  -1   6   3      637.69      658.21       45.21 o   0.1026E-03
   0   6   3       64.36       57.27        6.38 o   0.1845E-02
   1   6   3      398.30      426.59       29.77 o   0.1525E-03
   2   6   3        2.68        4.26       10.59 o   0.6616E-02
   3   6   3      102.48      101.08        9.06 o   0.1419E-02
   4   6   3       73.98       72.85       11.98 o   0.1543E-02
   5   6   3        7.32        0.71       14.80 o   0.7134E-02
   6   6   3        6.95        3.44       23.33 o   0.7428E-02
  -5   7   3       21.96       17.76       15.38 o   0.5301E-02
  -4   7   3       12.65       10.37       20.52 o   0.7364E-02
  -3   7   3      142.96      145.38       13.08 o   0.1056E-02
  -2   7   3      141.75      139.30       16.58 o   0.6506E-03
  -1   7   3       47.68       34.66        6.18 o   0.3710E-02
   0   7   3       18.46       10.57        8.97 o   0.7130E-02
   1   7   3        8.12        7.31        6.23 o   0.7462E-02
   2   7   3      369.51      387.55       28.68 o   0.2878E-03
   4   7   3       33.77       27.63       10.98 o   0.5055E-02
   5   7   3       15.86       40.21       23.37 o   0.2560E-02
   6   7   3       -5.94        2.07       21.08 o   0.7424E-02
  -5   8   3       -0.93        1.15        3.28 o   0.7470E-02
  -4   8   3       14.93       11.25       17.67 o   0.7379E-02
  -3   8   3      473.40      503.49       25.97 o   0.1512E-03
  -2   8   3      376.57      395.59       38.60 o   0.2274E-03
  -1   8   3       75.75       58.18        7.79 o   0.1833E-02
   0   8   3      190.69      204.10       12.36 o   0.6087E-03
   1   8   3       45.28       43.83        6.02 o   0.2294E-02
   2   8   3      275.48      350.47       18.16 o   0.2254E-03
   3   8   3      325.80      410.51       26.93 o   0.1714E-03
   4   8   3        8.47        2.36       12.73 o   0.6841E-02
   5   8   3      -11.63        3.22       28.15 o   0.7405E-02
   6   8   3        7.75        3.09       24.37 o   0.7439E-02
  -6   9   3       19.15        2.43       51.79 o   0.7446E-02
  -5   9   3      -11.73        3.83       23.84 o   0.6973E-02
  -4   9   3        0.01        0.01        2.24 o   0.7540E-02
  -3   9   3      103.89       99.02       12.16 o   0.8387E-03
  -2   9   3      113.93      101.76       10.62 o   0.1122E-02
  -1   9   3       48.95       55.61        6.96 o   0.1704E-02
   0   9   3        8.63        6.07        6.13 o   0.7404E-02
   1   9   3       99.84       95.89        7.95 o   0.1341E-02
   2   9   3      122.11      118.86        9.89 o   0.1075E-02
   3   9   3      272.69      331.80       32.85 o   0.3513E-03
   4   9   3        0.89        2.47        2.14 o   0.7446E-02
   5   9   3       13.55        5.57       17.94 o   0.7074E-02
  -5  10   3       -9.81        3.99       18.07 o   0.7298E-02
  -4  10   3        0.70       11.91        2.19 o   0.6839E-02
  -3  10   3      175.58      130.68       14.50 o   0.9057E-03
  -1  10   3        9.74       11.50        8.38 o   0.7467E-02
   0  10   3        5.40        0.15        4.62 o   0.7235E-02
   1  10   3       10.17       12.68        6.66 o   0.7405E-02
   2  10   3      193.65      229.36       15.22 o   0.2174E-03
   3  10   3       94.09       87.79       12.54 o   0.1215E-02
   4  10   3       19.79       11.38       10.18 o   0.6991E-02
   5  10   3        0.00        0.00        2.49 o   0.6724E-02
  -5  11   3        0.97        5.96        3.53 o   0.7276E-02
  -4  11   3        0.04        0.02        2.24 o   0.7556E-02
  -3  11   3       47.22       31.05       10.25 o   0.3862E-02
  -2  11   3     1225.26     1262.01       73.10 o   0.2181E-04
  -1  11   3       24.75       17.34        6.43 o   0.7184E-02
   0  11   3        9.15       10.11        6.32 o   0.7480E-02
   1  11   3        2.61        3.62        3.37 o   0.7386E-02
   2  11   3     1488.68     1688.73       76.74 o   0.1537E-04
   3  11   3       17.10       10.94        7.81 o   0.6977E-02
   4  11   3       -2.50        0.56        6.92 o   0.7523E-02
   5  11   3        5.81        0.49        5.99 o   0.6365E-02
   6  11   3       16.22       12.50       39.66 o   0.6935E-02
  -5  12   3      -11.75        2.95       23.86 o   0.7398E-02
  -4  12   3       38.02       38.57        9.20 o   0.1947E-02
  -3  12   3       17.86        2.89       16.81 o   0.6788E-02
  -1  12   3       63.58       61.65        7.14 o   0.1805E-02
   0  12   3      257.44      280.32       15.96 o   0.3722E-03
   1  12   3       43.88       49.92        5.93 o   0.1970E-02
   2  12   3      249.67      223.43       15.71 o   0.6871E-03
   3  12   3       -0.01        0.00        2.04 o   0.7304E-02
   4  12   3      103.82      109.52       17.23 o   0.1228E-02
   5  12   3       -2.79        0.32        7.81 o   0.7119E-02
   6  12   3       41.15        2.22       24.24 o   0.5678E-02
  -5  13   3        0.55        0.31        2.83 o   0.7574E-02
  -4  13   3      229.27      247.46       16.56 o   0.4741E-03
  -3  13   3        5.97        4.70        9.72 o   0.7433E-02
  -2  13   3      746.36      786.01       57.06 o   0.7439E-04
  -1  13   3       68.98       73.22        8.26 o   0.1551E-02
   0  13   3       11.10        6.30        6.30 o   0.7194E-02
   1  13   3       69.34       61.34        6.62 o   0.1658E-02
   2  13   3      330.26      430.91       30.72 o   0.1263E-03
   3  13   3       24.63       20.77       10.37 o   0.7336E-02
   4  13   3      176.10      219.36       18.48 o   0.4882E-03
   5  13   3        1.63        0.16        6.35 o   0.7575E-02
   6  13   3      109.04      102.11       29.08 o   0.1406E-02
  -5  14   3       16.99        4.39       29.11 o   0.6818E-02
  -4  14   3      158.96      146.06       15.05 o   0.1017E-02
  -3  14   3       10.05        6.27       12.29 o   0.7345E-02
  -2  14   3      204.91      224.91       19.93 o   0.3675E-03
  -1  14   3       10.02        6.23        9.13 o   0.7354E-02
   0  14   3        7.39        4.88        4.87 o   0.7419E-02
   1  14   3       -2.94        1.62        3.75 o   0.7428E-02
   2  14   3      438.09      504.62       33.30 o   0.1649E-03
   3  14   3        3.90        2.29        8.24 o   0.7431E-02
   5  14   3        0.12        4.38        2.39 o   0.7230E-02
  -5  15   3        6.49        9.74       16.97 o   0.7006E-02
  -4  15   3       78.59       74.86       10.58 o   0.9835E-03
  -3  15   3        7.24        1.24       10.70 o   0.7277E-02
  -2  15   3       52.17       60.58        9.34 o   0.2034E-02
  -1  15   3       27.93       24.68        6.83 o   0.5909E-02
   0  15   3       10.24        7.42        7.00 o   0.7360E-02
   1  15   3        7.86       11.21        6.97 o   0.7333E-02
   2  15   3       17.26       11.04        6.20 o   0.5288E-02
   3  15   3       -0.03        0.15        2.19 o   0.7551E-02
   4  15   3      275.09      307.23       32.99 o   0.4066E-03
   5  15   3       14.89        8.09       20.34 o   0.7158E-02
   6  15   3       50.56       15.81       26.17 o   0.5892E-02
  -5  16   3       -0.02        0.02        3.38 o   0.7411E-02
  -4  16   3      413.48      422.45       24.27 o   0.2096E-03
  -3  16   3        0.43        0.21        1.89 o   0.7424E-02
  -2  16   3       -0.02        1.72        1.74 o   0.7376E-02
  -1  16   3        9.64       10.12        9.26 o   0.7521E-02
   0  16   3      717.45      729.32       39.96 o   0.7266E-04
   1  16   3       -0.93        0.63        1.24 o   0.7490E-02
   2  16   3        6.58        8.91        9.44 o   0.7442E-02
   3  16   3        7.98        8.94       12.36 o   0.7512E-02
   4  16   3      288.59      366.88       25.34 o   0.2127E-03
   5  16   3       18.71       12.69       21.94 o   0.7203E-02
   6  16   3      174.95      114.49       23.68 o   0.1100E-02
  -5  17   3       11.86       11.09       24.66 o   0.7571E-02
  -4  17   3       94.96       75.41       11.63 o   0.1708E-02
  -3  17   3        0.46        0.46        1.84 o   0.7564E-02
  -2  17   3      118.00      116.86       11.88 o   0.1160E-02
  -1  17   3        2.58        6.92        4.79 o   0.7274E-02
   0  17   3      267.38      253.65       16.26 o   0.4342E-03
   1  17   3        7.59        9.33        7.12 o   0.7490E-02
   2  17   3       72.41       68.13       11.00 o   0.1453E-02
   3  17   3       -0.49        0.07        2.19 o   0.7573E-02
   4  17   3        0.07        0.08        2.88 o   0.7549E-02
   5  17   3        6.01        5.48       12.44 o   0.7530E-02
  -5  18   3       14.21        1.60       19.87 o   0.6936E-02
  -4  18   3       51.62       40.50        9.29 o   0.1870E-02
  -3  18   3        0.01        0.00        1.94 o   0.7302E-02
  -2  18   3       37.80       44.73        7.95 o   0.1588E-02
  -1  18   3        7.91        3.00        8.39 o   0.7291E-02
   0  18   3     4569.57     4810.67      248.74 o   0.2366E-05
   1  18   3        0.46        0.93        1.29 o   0.7479E-02
   2  18   3      136.07      156.58       15.08 o   0.9340E-03
   3  18   3        2.08        0.96        6.45 o   0.7472E-02
   4  18   3       88.66      100.47       13.11 o   0.1317E-02
   5  18   3       -0.43        0.18        2.59 o   0.7544E-02
   6  18   3       23.75        5.11       35.38 o   0.6648E-02
  -5  19   3       42.40       55.84       12.30 o   0.1752E-02
  -4  19   3       33.50       24.16       10.36 o   0.7057E-02
  -3  19   3        5.65        6.30        9.46 o   0.7497E-02
  -2  19   3       50.66       56.57        9.20 o   0.1949E-02
  -1  19   3        1.11        8.92        4.08 o   0.6369E-02
   0  19   3      132.93      130.81       10.32 o   0.9769E-03
   1  19   3       43.02       53.89        7.18 o   0.2236E-02
   2  19   3       17.49       19.36        7.07 o   0.3729E-02
   3  19   3        2.01        3.03        6.34 o   0.7313E-02
   4  19   3        1.48        0.88        5.69 o   0.7295E-02
   5  19   3       40.66       57.42       12.05 o   0.1784E-02
   6  19   3       35.01       16.08       15.89 o   0.6748E-02
  -5  20   3        5.59        5.92       12.23 o   0.7474E-02
  -4  20   3      175.10      159.13       14.48 o   0.8003E-03
  -3  20   3       -5.09        0.04        8.52 o   0.7166E-02
  -2  20   3       -4.61        2.04        7.69 o   0.7414E-02
  -1  20   3       62.42       53.57        8.64 o   0.1473E-02
   0  20   3        5.60        5.13        5.65 o   0.7562E-02
   1  20   3      147.76      145.86       10.88 o   0.9853E-03
   2  20   3       -8.38        2.81       10.37 o   0.7233E-02
   3  20   3        5.63        0.08       10.86 o   0.7246E-02
   4  20   3      114.11      117.87       14.87 o   0.9585E-03
   5  20   3        8.36        8.01       15.81 o   0.7569E-02
  -5  21   3       31.55       29.23       12.85 o   0.4404E-02
  -4  21   3       83.87       76.61       11.84 o   0.1226E-02
  -3  21   3        0.24        0.14        1.99 o   0.7558E-02
  -2  21   3       45.66       56.55        8.74 o   0.1899E-02
  -1  21   3      277.29      315.42       18.22 o   0.3169E-03
   0  21   3        8.63        6.72        7.30 o   0.7405E-02
   1  21   3      265.20      272.13       21.05 o   0.3844E-03
   2  21   3       32.91       24.26        7.99 o   0.3336E-02
   3  21   3       -6.00        1.30       10.47 o   0.7302E-02
   4  21   3      170.76      153.21       16.89 o   0.8960E-03
   5  21   3       14.49       13.11       19.31 o   0.7452E-02
  -5  22   3       10.52        0.66        8.71 o   0.6436E-02
  -4  22   3        2.40        6.74        7.86 o   0.7109E-02
  -3  22   3       16.75        5.76       16.69 o   0.7021E-02
  -2  22   3       21.76       13.40        9.28 o   0.3178E-02
  -1  22   3      144.49      172.61       11.95 o   0.8611E-03
   0  22   3       54.24       52.68        7.32 o   0.2000E-02
   1  22   3        2.29        1.33        4.06 o   0.2316E-02
   2  22   3      109.58       89.21       11.45 o   0.1463E-02
   3  22   3       -2.99        0.84        7.05 o   0.7284E-02
   4  22   3       15.72        7.86       18.53 o   0.7047E-02
   5  22   3       13.11        3.10       19.45 o   0.7072E-02
  -5  23   3      -24.47        0.43       12.79 o   0.6365E-02
  -4  23   3       42.66       31.60       12.99 o   0.4266E-02
  -3  23   3       70.63       81.63       10.87 o   0.1414E-02
  -2  23   3      170.20      178.83       14.27 o   0.7680E-03
  -1  23   3       72.72       88.18        8.48 o   0.9750E-03
   0  23   3        2.35        0.22        4.12 o   0.7432E-02
   2  23   3      119.23      107.14       11.95 o   0.9838E-03
   3  23   3       45.75       63.87       10.76 o   0.1515E-02
   4  23   3        5.37        4.48       11.06 o   0.7406E-02
   5  23   3       -0.15        0.02        3.48 o   0.7567E-02
  -5  24   3       18.08        4.00       23.68 o   0.6843E-02
  -4  24   3       51.78       32.35       12.88 o   0.3033E-02
  -3  24   3        8.74        8.46        5.59 o   0.6266E-02
  -2  24   3       33.96       28.62        9.27 o   0.4444E-02
  -1  24   3      182.90      193.41       13.45 o   0.6420E-03
   0  24   3       35.02       29.66        7.06 o   0.3426E-02
   1  24   3      186.48      196.26       16.30 o   0.6329E-03
   2  24   3        6.88        6.61       12.00 o   0.7535E-02
   3  24   3       53.09       71.49       11.59 o   0.1697E-02
   4  24   3       46.40       37.46       12.19 o   0.2644E-02
   5  24   3        4.52        0.83       14.16 o   0.7469E-02
  -5  25   3       13.27       17.54       20.65 o   0.7283E-02
  -4  25   3       -3.88        6.71        9.98 o   0.6992E-02
  -3  25   3       24.03       35.55       11.70 o   0.3233E-02
  -2  25   3       36.83       28.26        9.05 o   0.2052E-02
  -1  25   3       41.36       55.49        8.95 o   0.2201E-02
   0  25   3       -4.61        0.02        5.98 o   0.7277E-02
   1  25   3        2.37        1.98        6.59 o   0.7405E-02
   2  25   3      100.52      108.76       12.96 o   0.1236E-02
   3  25   3       15.62        8.73        7.86 o   0.6863E-02
   4  25   3       31.14       15.43       11.65 o   0.6676E-02
   5  25   3       24.48       17.36       14.27 o   0.7087E-02
  -4  26   3       -4.59        1.44       10.44 o   0.7259E-02
  -3  26   3      422.05      518.34       28.60 o   0.1484E-03
  -2  26   3       44.21       58.23        9.26 o   0.1867E-02
  -1  26   3       13.16       14.76       12.27 o   0.7557E-02
   0  26   3       13.24       10.17       10.86 o   0.7317E-02
   1  26   3       11.61        7.36       15.25 o   0.7224E-02
   2  26   3       23.51       25.94        9.64 o   0.3246E-02
   3  26   3      265.70      308.52       22.69 o   0.2506E-03
   4  26   3        9.41        5.39       14.64 o   0.7343E-02
   5  26   3       25.19        4.54       17.47 o   0.6527E-02
  -4  27   3       15.97        2.44       21.46 o   0.6787E-02
  -3  27   3      125.02      120.95       16.68 o   0.6761E-03
  -2  27   3        2.85        4.02        6.21 o   0.7513E-02
   0  27   3       -3.89        0.24        5.89 o   0.7339E-02
   1  27   3      139.59       78.58       19.97 o   0.1270E-02
   2  27   3        7.55        6.45       12.84 o   0.7503E-02
   3  27   3      377.37      406.10       32.84 o   0.2781E-03
   4  27   3        8.09        1.69       14.43 o   0.7155E-02
   5  27   3       -6.94        7.96       13.36 o   0.7488E-02
  -5  28   3       11.76        1.96       35.12 o   0.7488E-02
  -4  28   3       -1.10        0.40        5.43 o   0.7544E-02
  -3  28   3      109.25      137.98       14.55 o   0.8623E-03
  -2  28   3       20.77       10.06       16.77 o   0.7088E-02
  -1  28   3       42.30       20.88        8.41 o   0.5706E-02
   0  28   3        2.22        0.48        5.78 o   0.7549E-02
   1  28   3       55.36       22.98       11.10 o   0.3936E-02
   2  28   3        0.81        0.26        2.34 o   0.7238E-02
   3  28   3      115.37      120.29       16.02 o   0.9717E-03
   4  28   3        0.75        0.26        3.03 o   0.7561E-02
   5  28   3        0.24        0.01        4.57 o   0.7551E-02
  -4  29   3       17.47        3.23       21.61 o   0.6785E-02
  -3  29   3      127.40      148.18       14.59 o   0.8530E-03
  -2  29   3        0.42        0.27        2.19 o   0.7438E-02
  -1  29   3       26.05       29.25        8.63 o   0.4646E-02
   0  29   3       -0.32        0.35        1.94 o   0.7554E-02
   1  29   3        0.16        0.72        2.24 o   0.7082E-02
   2  29   3        2.06        9.00        6.43 o   0.7104E-02
   3  29   3      109.67      120.21       15.62 o   0.9577E-03
   4  29   3        4.54        0.53       12.29 o   0.7022E-02
   5  29   3       40.06       13.42       28.32 o   0.6257E-02
  -5  30   3       -0.03        0.02        5.67 o   0.7565E-02
  -4  30   3       -6.59        3.19       13.27 o   0.7357E-02
  -3  30   3       45.27       40.64       12.71 o   0.3298E-02
  -2  30   3       19.83       10.32       15.94 o   0.7079E-02
  -1  30   3      113.89      133.30       10.61 o   0.1004E-02
   0  30   3       -0.32        1.38        1.99 o   0.7475E-02
   1  30   3       67.83       78.39       11.47 o   0.1281E-02
   2  30   3        0.58        0.35        2.19 o   0.7454E-02
   3  30   3        3.02        1.45        4.49 o   0.6870E-02
   4  30   3        3.89        1.97       10.99 o   0.7439E-02
  -4  31   3        0.02        0.01        2.64 o   0.7530E-02
  -3  31   3       10.75        7.76        7.50 o   0.7046E-02
  -2  31   3        4.72        0.11        9.29 o   0.7284E-02
  -1  31   3      160.86      238.86       13.87 o   0.4297E-03
   0  31   3      -10.52        0.03       16.45 o   0.6897E-02
   1  31   3      192.27      221.80       28.96 o   0.5103E-03
   2  31   3       -3.59        0.08        8.85 o   0.7575E-02
   3  31   3       52.06       55.24       14.35 o   0.2352E-02
   4  31   3      -15.42        2.81       24.60 o   0.6947E-02
   5  31   3      -33.76        0.60       20.23 o   0.5961E-02
  -4  32   3        8.81        5.40       16.53 o   0.7332E-02
  -3  32   3       40.80       42.07       12.07 o   0.2499E-02
  -2  32   3        7.93        0.40       12.60 o   0.7156E-02
  -1  32   3       14.34       17.37        5.65 o   0.3171E-02
   0  32   3       19.22       18.36       11.77 o   0.7492E-02
   1  32   3       75.07       89.84       12.92 o   0.1463E-02
   2  32   3       -1.13        0.07        4.75 o   0.7573E-02
   3  32   3       41.42       35.13       12.80 o   0.2911E-02
   4  32   3       24.74        9.35       13.36 o   0.6762E-02
  -4  33   3        1.74        0.31        7.34 o   0.7551E-02
  -3  33   3       31.65       31.89       12.31 o   0.3826E-02
  -2  33   3        2.83        4.33        7.20 o   0.7449E-02
  -1  33   3       28.84       30.14        8.54 o   0.4955E-02
   0  33   3        7.39        1.02       13.52 o   0.7157E-02
   1  33   3        0.03        0.02        2.19 o   0.7381E-02
   2  33   3       12.76       10.43       17.05 o   0.7412E-02
   3  33   3        7.20        5.71       14.14 o   0.7381E-02
   4  33   3      -16.00        1.38       25.06 o   0.6800E-02
  -4  34   3       12.49        3.03       18.98 o   0.6825E-02
  -3  34   3       14.13        8.37       18.32 o   0.7261E-02
  -2  34   3        4.74        0.21        7.80 o   0.7130E-02
  -1  34   3      137.66      172.73       12.84 o   0.7200E-03
   0  34   3       52.96       44.09       13.03 o   0.2243E-02
   1  34   3      122.68      129.09       14.32 o   0.9046E-03
   2  34   3        4.40        0.70       10.22 o   0.7528E-02
   3  34   3        3.54       10.37       11.98 o   0.6979E-02
   4  34   3       15.09        6.76       24.73 o   0.7107E-02
  -4  35   3       12.95       11.25       23.26 o   0.7415E-02
  -3  35   3        0.00        0.00        2.49 o   0.6998E-02
  -2  35   3        6.59        0.70       11.23 o   0.7208E-02
  -1  35   3       69.70       81.82       13.28 o   0.1230E-02
   0  35   3       19.22        2.83       23.11 o   0.6531E-02
   1  35   3      113.81      123.68       13.79 o   0.1038E-02
   2  35   3      -10.66        0.54       15.26 o   0.6866E-02
   3  35   3        9.81        3.74       20.56 o   0.7374E-02
   4  35   3        1.17        7.54        8.82 o   0.7011E-02
  -4  36   3       -6.96        0.15       28.07 o   0.7543E-02
  -3  36   3        3.63        6.23        9.48 o   0.7096E-02
  -2  36   3        0.00        1.23        2.14 o   0.7448E-02
  -1  36   3       -0.13        0.22        3.33 o   0.7293E-02
   0  36   3      313.67      249.97       42.27 o   0.4022E-03
   1  36   3       36.69       20.32       12.05 o   0.6697E-02
   2  36   3       -0.23        4.21        2.83 o   0.7343E-02
   3  36   3       -6.83        8.23       13.00 o   0.7420E-02
   4  36   3        1.48        1.08        7.76 o   0.7538E-02
  -4  37   3       -3.89        0.46       20.00 o   0.7532E-02
  -3  37   3       12.96        8.44       18.98 o   0.7327E-02
  -2  37   3        5.10        1.49        9.88 o   0.7180E-02
  -1  37   3        4.84        5.11       15.97 o   0.7323E-02
   0  37   3        7.15        1.26       21.01 o   0.7522E-02
   1  37   3       10.83        1.44       16.04 o   0.6606E-02
   2  37   3       15.42        5.44       19.52 o   0.6985E-02
   3  37   3        6.82        3.85       18.18 o   0.7260E-02
   4  37   3        8.53        1.17       24.69 o   0.7509E-02
  -4  38   3       67.76       15.59       30.29 o   0.4986E-02
  -3  38   3        8.52        8.76       15.68 o   0.7521E-02
  -2  38   3        7.71        2.19       12.15 o   0.7222E-02
  -1  38   3        3.29        2.30       12.82 o   0.7246E-02
   0  38   3       97.29      101.17       15.70 o   0.1202E-02
   1  38   3       14.79       15.10       23.71 o   0.7535E-02
   2  38   3        8.13        3.03       17.86 o   0.7359E-02
   3  38   3       16.56       19.32       28.33 o   0.7441E-02
   4  38   3        0.70        4.32        4.33 o   0.7098E-02
  -3  39   3        3.31        0.02        9.40 o   0.7077E-02
  -2  39   3        0.06        0.00        2.19 o   0.7123E-02
  -1  39   3       97.38       98.61       22.57 o   0.1237E-02
   0  39   3       27.21        8.43       18.68 o   0.6332E-02
   1  39   3       98.03       94.30       14.77 o   0.1257E-02
   2  39   3        7.21        0.71       16.55 o   0.7531E-02
   3  39   3       27.17        0.17       17.63 o   0.6183E-02
  -3  40   3        4.87        0.40       11.63 o   0.7144E-02
  -2  40   3       14.96       20.05       17.70 o   0.5779E-02
  -1  40   3       11.33       19.96       27.78 o   0.6443E-02
   0  40   3      107.04       82.73       24.69 o   0.1300E-02
   1  40   3       14.22       11.36       23.63 o   0.7364E-02
   2  40   3       25.86       23.68       15.68 o   0.5132E-02
   3  40   3        2.93        1.26       11.24 o   0.7522E-02
  -3  41   3       16.36       18.03       22.13 o   0.7547E-02
  -2  41   3       20.48       21.76       19.35 o   0.5758E-02
  -1  41   3        5.78        3.98       19.60 o   0.7206E-02
   0  41   3       14.88        0.88       33.38 o   0.6653E-02
   1  41   3        0.63        8.24        4.77 o   0.7088E-02
   2  41   3       22.31       21.31       19.26 o   0.6189E-02
   3  41   3       -5.69        5.78       21.34 o   0.7001E-02
  -3  42   3       23.11       11.35       14.34 o   0.6939E-02
  -2  42   3       43.27       43.92       21.59 o   0.2568E-02
  -1  42   3        7.01       13.52       22.11 o   0.6797E-02
   0  42   3       -0.38       13.15        4.08 o   0.6730E-02
   1  42   3        8.42        8.84       19.05 o   0.7557E-02
   2  42   3       21.86       28.35       19.53 o   0.3349E-02
   3  42   3      -14.96        6.22       35.78 o   0.6892E-02
  -3  43   3        2.06        0.01        4.85 o   0.6336E-02
  -2  43   3        1.07        0.79        8.76 o   0.7380E-02
  -1  43   3      -14.28        0.08       29.69 o   0.7574E-02
   0  43   3       11.10        0.56       29.82 o   0.7535E-02
   1  43   3        0.00        0.00        3.48 o   0.7575E-02
   2  43   3        8.42       10.09       20.78 o   0.7008E-02
   3  43   3      -13.44        0.53       36.10 o   0.7537E-02
  -2  44   3       24.00       18.10       18.03 o   0.4562E-02
  -1  44   3        6.37        0.86       21.34 o   0.7510E-02
   0  44   3       31.49       37.48       20.09 o   0.2867E-02
   1  44   3       -2.00        2.22       14.78 o   0.7476E-02
   2  44   3       52.46       50.18       24.49 o   0.2352E-02
  -2  45   3      116.27       95.87       26.81 o   0.1124E-02
  -1  45   3        1.80        0.61       11.86 o   0.7519E-02
   0  45   3       -2.49        2.19       14.60 o   0.7442E-02
   1  45   3       -7.43        1.47       27.38 o   0.7481E-02
   2  45   3      119.94      120.83       29.41 o   0.1075E-02
  -2  46   3      133.65      126.22       29.89 o   0.1170E-02
  -1  46   3        0.00        0.00        4.82 o   0.7553E-02
   0  46   3      -11.99        0.57       31.00 o   0.7551E-02
   1  46   3      -12.82        1.32       39.52 o   0.7493E-02
   2  46   3       18.63       13.39       14.17 o   0.2507E-02
  -1  47   3      -15.39        0.56       38.23 o   0.7528E-02
   0  47   3       13.56        2.46       36.62 o   0.7381E-02
   1  47   3       -1.91        0.21       15.41 o   0.7549E-02
  -1  48   3       14.18        4.25       41.19 o   0.7329E-02
   0  48   3       13.88       21.19       38.54 o   0.4815E-02
   1  48   3       -4.76        0.51       24.52 o   0.7496E-02
   0  49   3      -16.27        0.79       39.71 o   0.7538E-02
  -4   0   4       40.10       31.03       23.93 o   0.3591E-02
  -3   0   4       19.80       14.52       18.58 o   0.7043E-02
  -2   0   4       31.88       26.58       15.72 o   0.2720E-02
  -1   0   4       -0.50        0.38        1.79 o   0.7495E-02
   0   0   4      387.44      292.06       31.32 o   0.2983E-03
   1   0   4       13.48        3.44       12.42 o   0.7059E-02
   2   0   4       74.79       80.07       12.04 o   0.1622E-02
   3   0   4       28.80       35.97       11.74 o   0.3598E-02
   4   0   4       34.16       17.04       16.86 o   0.5739E-02
   5   0   4       23.53       24.81       17.85 o   0.4227E-02
  -5   1   4       -6.04        3.54       25.17 o   0.7324E-02
  -4   1   4       82.96       61.67       19.93 o   0.1709E-02
  -3   1   4       42.75       21.80       16.91 o   0.6371E-02
  -2   1   4       31.43       12.63       13.94 o   0.6691E-02
  -1   1   4        6.44        1.99        6.31 o   0.7338E-02
   0   1   4     2363.58     2089.32      130.54 o   0.9178E-05
   1   1   4        2.35        0.55        5.49 o   0.7410E-02
   2   1   4        0.18        0.20        1.44 o   0.7532E-02
   3   1   4        5.19        2.94        8.83 o   0.7189E-02
   4   1   4       34.74       38.80       12.89 o   0.2241E-02
  -4   2   4       42.45       30.68       24.62 o   0.5240E-02
  -3   2   4        2.06        0.02       10.00 o   0.7575E-02
  -2   2   4       34.33       21.44       13.98 o   0.6813E-02
  -1   2   4      112.39       92.35       10.54 o   0.1002E-02
   0   2   4       47.98        4.45        8.27 o   0.4963E-02
   1   2   4      205.13      194.56       14.24 o   0.7245E-03
   2   2   4        0.57        4.08        1.49 o   0.7107E-02
   3   2   4       13.73        0.09       11.79 o   0.6838E-02
   4   2   4        3.27        1.59       10.26 o   0.6947E-02
   5   2   4        8.32       20.61       23.81 o   0.4703E-02
  -4   3   4       32.16       37.08       14.66 o   0.2028E-02
  -3   3   4        3.17        0.69       12.04 o   0.7081E-02
  -2   3   4       10.96        1.72       13.17 o   0.6951E-02
  -1   3   4       96.89       56.77        8.81 o   0.2216E-02
   0   3   4      373.75      375.87       21.15 o   0.2391E-03
   1   3   4        0.24        0.09        0.75 o   0.6168E-02
   2   3   4        5.73        1.61        6.90 o   0.7287E-02
   3   3   4        6.52        7.59        8.12 o   0.7499E-02
   4   3   4      104.62      103.47       16.28 o   0.1329E-02
   5   3   4       13.84        0.81       22.56 o   0.6890E-02
   6   3   4       47.77       28.87       26.12 o   0.4975E-02
  -5   4   4       15.90       10.34       49.97 o   0.6835E-02
  -4   4   4      102.18       83.54       17.09 o   0.1301E-02
  -3   4   4        0.86       11.19        3.33 o   0.6923E-02
  -2   4   4        3.19        2.94        7.46 o   0.7449E-02
  -1   4   4      618.03      622.42       32.14 o   0.9904E-04
   0   4   4       15.91        2.39       13.49 o   0.6715E-02
   1   4   4      543.77      582.26       32.47 o   0.1025E-03
   2   4   4       60.76       52.75       10.08 o   0.2437E-02
   3   4   4        4.63        5.76        8.77 o   0.7490E-02
   4   4   4       73.34       84.91       15.33 o   0.1335E-02
   5   4   4       19.18       12.44       27.44 o   0.7097E-02
   6   4   4       93.06       52.65       29.74 o   0.2171E-02
  -5   5   4        0.32        0.02        2.98 o   0.7548E-02
  -4   5   4       58.56       55.13       14.46 o   0.2146E-02
  -3   5   4        5.89       13.70       16.17 o   0.6929E-02
  -2   5   4      116.34       97.38       13.94 o   0.1321E-02
  -1   5   4      180.10      168.51       33.37 o   0.5790E-03
   0   5   4       -2.35        0.85        4.73 o   0.7467E-02
   1   5   4      359.31      345.16       20.74 o   0.3352E-03
   2   5   4       37.74       35.62        8.55 o   0.2129E-02
   3   5   4        0.92        0.38        1.99 o   0.7239E-02
   4   5   4       23.38       20.79        8.66 o   0.3889E-02
   5   5   4        0.99        1.93        3.88 o   0.7475E-02
   6   5   4        5.94        9.32       22.29 o   0.7121E-02
  -5   6   4        5.22       16.36       18.17 o   0.6522E-02
  -4   6   4      -13.88        4.72       20.75 o   0.7129E-02
  -3   6   4      207.58      176.90       20.06 o   0.6687E-03
  -2   6   4      135.00      106.20       16.18 o   0.1118E-02
  -1   6   4      117.91      101.49       14.04 o   0.1367E-02
   0   6   4       -4.61        5.35        5.77 o   0.7442E-02
   1   6   4        1.84        2.03        2.30 o   0.5362E-02
   2   6   4       91.96       74.24       11.44 o   0.1330E-02
   3   6   4      169.97      173.73       16.86 o   0.7455E-03
   4   6   4        0.29        0.04        2.19 o   0.7075E-02
  -5   7   4       -0.02        0.00        2.29 o   0.6157E-02
  -4   7   4       -0.06        0.08        2.88 o   0.7323E-02
  -3   7   4      281.28      251.85       43.37 o   0.4624E-03
  -2   7   4      115.67      108.52       12.84 o   0.9916E-03
  -1   7   4      316.70      320.13       24.78 o   0.3559E-03
   0   7   4       69.38       58.43        7.46 o   0.1705E-02
   1   7   4      213.39      223.06       14.53 o   0.4779E-03
   2   7   4      139.39      181.20       11.74 o   0.6780E-03
   3   7   4      146.39      184.49       15.64 o   0.5699E-03
   4   7   4       28.27       17.35       11.11 o   0.7042E-02
   5   7   4        5.46        2.03       13.25 o   0.7471E-02
   6   7   4        3.96       16.04       19.39 o   0.6731E-02
  -5   8   4       20.25        5.12       56.39 o   0.7267E-02
  -4   8   4       31.38       18.47       13.37 o   0.6576E-02
  -2   8   4       57.10       47.09       11.27 o   0.2638E-02
  -1   8   4       59.62       48.95        8.45 o   0.2244E-02
   0   8   4        4.80        2.04        5.67 o   0.7406E-02
   1   8   4       17.88       26.75        6.73 o   0.3392E-02
   2   8   4        6.47        4.42        5.06 o   0.7126E-02
   3   8   4       83.42       78.69       10.90 o   0.9283E-03
   4   8   4       24.52       26.74        9.85 o   0.4815E-02
   5   8   4       10.99        3.08       21.10 o   0.6977E-02
  -5   9   4      -11.01        0.24       24.42 o   0.7564E-02
  -4   9   4       -3.74        0.68       10.96 o   0.7538E-02
  -3   9   4      449.09      477.49       42.15 o   0.9392E-04
  -2   9   4       22.90       27.26        9.04 o   0.4782E-02
  -1   9   4        7.84        8.99       10.31 o   0.7332E-02
   0   9   4       13.88       10.68        9.64 o   0.7322E-02
   1   9   4       61.60       63.58        9.37 o   0.2113E-02
   2   9   4       17.97       18.09        6.74 o   0.6838E-02
   3   9   4      863.08     1149.23       49.67 o   0.3266E-04
   4   9   4       13.14        0.40       20.55 o   0.6636E-02
   5   9   4        7.26        0.11       16.88 o   0.6991E-02
  -5  10   4       12.45       16.33       23.16 o   0.7296E-02
  -4  10   4      -26.23        2.31       13.24 o   0.6388E-02
  -3  10   4      158.84      151.98       22.56 o   0.1037E-02
  -2  10   4      152.10      179.86       19.62 o   0.8146E-03
  -1  10   4       24.36        4.90        8.84 o   0.6570E-02
   0  10   4       -2.92        0.11        4.42 o   0.7383E-02
   1  10   4        0.77        0.25        1.34 o   0.7399E-02
   2  10   4       35.07       35.82        8.25 o   0.1678E-02
   3  10   4        6.18        6.48        4.70 o   0.2841E-02
   4  10   4        0.00        0.00        2.19 o   0.7353E-02
   5  10   4       36.31       22.88       19.78 o   0.5235E-02
   6  10   4       -9.20        0.76       28.96 o   0.7518E-02
  -5  11   4       -2.46        0.44       18.87 o   0.7520E-02
  -4  11   4      -10.15        0.55       18.06 o   0.7019E-02
  -3  11   4      215.75      204.21       23.37 o   0.7121E-03
  -2  11   4        1.07        0.51        1.96 o   0.6699E-02
   0  11   4       52.32       48.95        7.19 o   0.2106E-02
   1  11   4      192.19      194.35       13.79 o   0.4841E-03
   2  11   4       57.72       52.81       11.33 o   0.2452E-02
   3  11   4       56.06       67.16       11.91 o   0.1178E-02
   4  11   4       -3.60        0.30        8.31 o   0.7331E-02
   5  11   4      -14.64        2.30       28.92 o   0.6916E-02
  -5  12   4       12.78        4.36       34.48 o   0.7166E-02
  -4  12   4        2.22        1.55        8.60 o   0.7436E-02
  -3  12   4      382.11      386.95       23.33 o   0.2456E-03
  -2  12   4       98.23       72.89       10.84 o   0.1136E-02
  -1  12   4      208.35      192.59       20.10 o   0.7945E-03
   0  12   4        2.49        7.32        4.24 o   0.7269E-02
   1  12   4       21.60       22.03        6.93 o   0.1818E-02
   2  12   4      167.21      165.23       15.43 o   0.8781E-03
   3  12   4      269.36      333.56       22.85 o   0.2522E-03
   4  12   4       17.78       15.51       18.87 o   0.7360E-02
   5  12   4       23.74       11.93       14.54 o   0.6954E-02
  -5  13   4        2.04        1.02       11.21 o   0.7447E-02
  -4  13   4       -4.84        0.30       11.81 o   0.6840E-02
  -3  13   4       36.64       29.74        9.63 o   0.2365E-02
  -2  13   4       45.76       31.32        9.42 o   0.3833E-02
  -1  13   4       46.65       40.60        9.51 o   0.1083E-02
   0  13   4       15.57       11.46       10.99 o   0.7297E-02
   1  13   4      386.60      346.49       31.29 o   0.3714E-03
   2  13   4        6.80       18.33       13.48 o   0.6265E-02
   3  13   4       76.88       84.57       12.21 o   0.1449E-02
   4  13   4       10.08        2.38       14.84 o   0.7209E-02
   5  13   4       19.73        4.80       22.97 o   0.6802E-02
  -5  14   4        6.44       30.76       20.70 o   0.2400E-02
  -4  14   4        7.83        9.19       16.14 o   0.7538E-02
  -3  14   4       -0.10        0.87        2.24 o   0.7454E-02
  -2  14   4       -0.16        0.04        1.94 o   0.7535E-02
  -1  14   4     1153.00     1187.02       67.54 o   0.2590E-04
   0  14   4        3.39        0.18        5.13 o   0.7367E-02
   1  14   4     1246.79     1359.40       66.72 o   0.2212E-04
   2  14   4        0.63        2.45        1.99 o   0.7440E-02
   3  14   4        9.40        5.65       13.72 o   0.7369E-02
   4  14   4       10.23        8.14       18.77 o   0.7477E-02
   5  14   4       64.56       50.99       13.58 o   0.2107E-02
  -5  15   4        9.80       27.11       23.03 o   0.5683E-02
  -4  15   4       -1.12        1.51        5.69 o   0.7454E-02
  -3  15   4       76.17       64.06       11.28 o   0.1875E-02
  -2  15   4        6.77        1.91       10.35 o   0.7191E-02
   0  15   4       11.10       14.16        8.61 o   0.7407E-02
   1  15   4      277.82      318.95       18.23 o   0.2144E-03
   2  15   4        3.57        3.30        7.70 o   0.7402E-02
   3  15   4       21.35       27.50        9.19 o   0.3200E-02
   4  15   4       11.60        2.59       20.32 o   0.7055E-02
   5  15   4        0.96        0.17        1.69 o   0.5806E-02
  -5  16   4      250.05      320.00       33.02 o   0.2691E-03
  -4  16   4       -6.13        0.56       13.54 o   0.7542E-02
  -3  16   4       -0.55        0.03        2.19 o   0.7572E-02
  -2  16   4       -0.68        5.63        1.99 o   0.7275E-02
  -1  16   4       86.86      104.93       15.76 o   0.1339E-02
   0  16   4        3.39        5.50        5.31 o   0.7440E-02
   1  16   4        2.62        2.26        2.57 o   0.4955E-02
   2  16   4       -0.06        0.98        1.99 o   0.7435E-02
   3  16   4        4.68        0.41        9.47 o   0.7566E-02
   4  16   4        0.63        0.02        2.39 o   0.7230E-02
   5  16   4      315.86      330.30       26.51 o   0.2910E-03
  -5  17   4      -11.92        5.20       43.60 o   0.7236E-02
  -4  17   4       -2.64        1.13        8.89 o   0.7529E-02
  -3  17   4       -0.07        0.09        2.09 o   0.7396E-02
  -2  17   4        0.70        0.71        2.09 o   0.7532E-02
  -1  17   4       89.56       94.55       13.18 o   0.8321E-03
   0  17   4      168.38      168.55       15.49 o   0.7562E-03
   1  17   4      330.86      368.90       28.94 o   0.3052E-03
   2  17   4       -0.30        0.07        2.04 o   0.7561E-02
   3  17   4       26.18       12.37       11.19 o   0.6891E-02
   4  17   4        0.64        0.08        2.34 o   0.7537E-02
   5  17   4        4.46        5.35       12.81 o   0.7215E-02
  -5  18   4       43.15       48.44       18.95 o   0.2019E-02
  -4  18   4       -0.01        0.01        2.59 o   0.7544E-02
  -3  18   4        4.44        0.91        9.01 o   0.7274E-02
  -2  18   4        3.86        4.78        8.40 o   0.7510E-02
  -1  18   4       45.42       43.86        9.38 o   0.2143E-02
   0  18   4       24.11       13.17        8.79 o   0.6844E-02
   1  18   4       96.75       73.76       10.76 o   0.1543E-02
   2  18   4        2.37       10.03        6.28 o   0.7022E-02
   3  18   4        8.56        2.36       13.10 o   0.7228E-02
   4  18   4      -18.25        1.10       19.54 o   0.6738E-02
   5  18   4       59.03       54.74       16.81 o   0.1956E-02
  -5  19   4       57.13       56.87       21.05 o   0.2314E-02
  -4  19   4        0.08        6.38        3.43 o   0.7099E-02
  -3  19   4       24.85       21.20       10.41 o   0.7396E-02
  -2  19   4       29.66        9.13       10.83 o   0.6543E-02
  -1  19   4      141.93      129.83       13.03 o   0.8446E-03
   0  19   4      214.39      235.21       17.47 o   0.4937E-03
   1  19   4      185.94      197.05       13.56 o   0.6769E-03
   2  19   4        1.25        0.87        4.67 o   0.7491E-02
   3  19   4        7.62        5.65       12.08 o   0.7400E-02
   4  19   4        1.04       12.06        4.87 o   0.6773E-02
   5  19   4        5.59        2.61        6.11 o   0.6471E-02
  -5  20   4      346.18      432.75       51.81 o   0.1577E-03
  -4  20   4       10.69       11.65       18.20 o   0.7545E-02
  -3  20   4       -0.02        3.35        2.14 o   0.7149E-02
  -2  20   4        0.70        0.69        2.14 o   0.7475E-02
  -1  20   4       32.20       31.11        9.59 o   0.2292E-02
   0  20   4       -2.92        0.00        6.46 o   0.7383E-02
   1  20   4      111.84       99.54       10.52 o   0.1340E-02
   2  20   4       -0.69        6.28        2.19 o   0.7269E-02
   3  20   4       23.22       22.07       22.53 o   0.7500E-02
   4  20   4        9.09       15.12       18.89 o   0.7173E-02
   5  20   4      428.54      512.06       32.94 o   0.1327E-03
  -4  21   4        9.85       13.60       14.98 o   0.7253E-02
  -3  21   4       -0.29        1.04        2.09 o   0.7503E-02
  -2  21   4        2.04        0.94        5.97 o   0.7422E-02
  -1  21   4       63.26       57.07       10.28 o   0.2175E-02
   0  21   4       83.14       79.98       13.60 o   0.1411E-02
   1  21   4        3.21        2.62        6.41 o   0.7337E-02
   2  21   4       14.84        4.05       15.71 o   0.6943E-02
   3  21   4       10.51        3.39       14.83 o   0.7145E-02
   4  21   4        8.43       30.69       13.86 o   0.3772E-02
   5  21   4        0.52        0.59        2.83 o   0.7259E-02
  -4  22   4       31.94       41.25       10.12 o   0.2312E-02
  -3  22   4        1.84        9.09        5.80 o   0.6976E-02
  -2  22   4       12.27       14.29       14.63 o   0.7491E-02
  -1  22   4      598.30      638.19       34.06 o   0.1005E-03
   0  22   4      -10.52        1.22       16.45 o   0.6971E-02
   1  22   4      468.82      506.61       34.45 o   0.1282E-03
   2  22   4       28.30       42.74       10.05 o   0.2487E-02
   3  22   4        7.80       11.89       12.77 o   0.7328E-02
   4  22   4       49.33       50.21       16.76 o   0.2205E-02
   5  22   4       19.11       23.90       40.87 o   0.5159E-02
  -4  23   4        5.38       28.34       12.69 o   0.4003E-02
  -3  23   4       21.65       16.17       19.90 o   0.7312E-02
  -2  23   4       32.36       41.84        9.62 o   0.2813E-02
  -1  23   4       96.16       92.55       10.73 o   0.1034E-02
   0  23   4       12.30       22.65       19.18 o   0.5565E-02
   1  23   4      184.90      212.78       16.23 o   0.6180E-03
   2  23   4        5.64       22.76        9.68 o   0.4203E-02
   3  23   4        6.49        2.97       11.15 o   0.7131E-02
   4  23   4        3.59        5.82        9.05 o   0.7333E-02
   5  23   4        6.94        0.06       14.41 o   0.6836E-02
  -4  24   4       12.03        1.67       19.31 o   0.7059E-02
  -3  24   4       43.41       47.51       11.14 o   0.1730E-02
  -2  24   4       78.29       86.46       12.32 o   0.1315E-02
  -1  24   4       13.44       13.23       14.58 o   0.7561E-02
   0  24   4        1.51        6.90        4.39 o   0.7020E-02
   1  24   4        0.55        0.34        2.29 o   0.7447E-02
   2  24   4       85.51       98.72       11.04 o   0.1153E-02
   3  24   4      105.21      107.08       12.24 o   0.1251E-02
   4  24   4       -0.27        0.04        2.98 o   0.7546E-02
   5  24   4       16.26        9.24       39.70 o   0.7012E-02
  -4  25   4       -4.04        0.14       10.59 o   0.7203E-02
  -3  25   4      151.45      153.31       17.13 o   0.8830E-03
  -2  25   4       50.96       54.28        9.23 o   0.1624E-02
  -1  25   4       64.13       65.48       10.35 o   0.1768E-02
   0  25   4       22.00        6.57       11.66 o   0.6672E-02
   1  25   4       37.78       47.51       10.39 o   0.2002E-02
   2  25   4      109.02      105.01       11.42 o   0.1270E-02
   3  25   4      124.45      111.19       13.31 o   0.1003E-02
   4  25   4       -9.30        0.45       14.86 o   0.7080E-02
   5  25   4        4.82        2.32       23.81 o   0.7437E-02
  -4  26   4        1.24        0.34        5.88 o   0.7254E-02
  -3  26   4       32.06       13.66       11.26 o   0.6709E-02
  -2  26   4       25.33       26.78        9.51 o   0.6069E-02
  -1  26   4        9.03        1.26       11.96 o   0.7174E-02
   0  26   4        3.39        1.36        9.70 o   0.7494E-02
   1  26   4       -0.16        0.08        2.19 o   0.7553E-02
   2  26   4        1.48        1.47        5.33 o   0.7551E-02
   3  26   4        0.20        0.11        2.24 o   0.7435E-02
   4  26   4       16.41        7.26       20.14 o   0.7148E-02
   5  26   4      -12.36       12.29       29.72 o   0.6853E-02
  -4  27   4       -1.85        2.08        7.30 o   0.7415E-02
  -3  27   4       67.64       72.56       13.09 o   0.1486E-02
  -2  27   4       14.69       25.23       14.87 o   0.4245E-02
  -1  27   4       -1.35        2.07        4.50 o   0.7476E-02
   0  27   4       11.69        3.25       18.02 o   0.7055E-02
   1  27   4       15.00       20.84       16.95 o   0.7254E-02
   2  27   4       33.55       31.96       10.37 o   0.3425E-02
   3  27   4       90.09       80.95       12.27 o   0.1404E-02
   4  27   4       17.80        0.92       18.04 o   0.6209E-02
   5  27   4       10.62        0.96       24.63 o   0.7524E-02
  -4  28   4        3.41        3.00       10.09 o   0.7337E-02
  -3  28   4       -6.34        2.41       13.02 o   0.7313E-02
  -2  28   4      192.73      228.17       16.57 o   0.5975E-03
  -1  28   4       25.49       24.85        9.54 o   0.5626E-02
   0  28   4       15.57        0.07       22.37 o   0.6583E-02
   1  28   4       15.15       15.06       17.03 o   0.7540E-02
   2  28   4       62.98       62.83       11.84 o   0.1232E-02
   3  28   4        8.68        3.40       15.24 o   0.7303E-02
   4  28   4       25.39        6.32       22.05 o   0.6480E-02
  -4  29   4       11.47        0.96       12.80 o   0.6385E-02
  -3  29   4        9.65        8.62       16.37 o   0.7562E-02
  -2  29   4       18.46       13.00       10.25 o   0.3876E-02
  -1  29   4        2.54        2.23        6.02 o   0.7541E-02
   0  29   4        5.81        3.78       12.71 o   0.7410E-02
   1  29   4       14.07       15.17       20.51 o   0.7493E-02
   2  29   4      109.14       78.90       13.51 o   0.1556E-02
   3  29   4       16.74        9.89       21.57 o   0.7199E-02
   4  29   4       35.09        4.16       24.15 o   0.5988E-02
  -4  30   4       19.34       12.77       11.37 o   0.7026E-02
  -3  30   4        4.36        4.36       10.80 o   0.7556E-02
  -2  30   4       91.72      104.53       13.33 o   0.9921E-03
  -1  30   4       -1.19        0.09        4.02 o   0.7574E-02
   0  30   4        0.38        6.38        2.44 o   0.7107E-02
   1  30   4        0.35        0.00        2.88 o   0.7122E-02
   2  30   4      133.91      173.61       14.96 o   0.7236E-03
   3  30   4       19.34       11.83       24.06 o   0.7131E-02
   4  30   4       23.19       33.42       22.99 o   0.3686E-02
  -4  31   4        3.22        9.35       10.18 o   0.6978E-02
  -3  31   4       11.17        7.52       17.62 o   0.7328E-02
  -2  31   4       85.91      115.39       12.91 o   0.1041E-02
  -1  31   4       15.73       12.54       19.72 o   0.7469E-02
   0  31   4        6.69        7.82       13.38 o   0.7551E-02
   1  31   4       -0.30        0.28        2.69 o   0.7367E-02
   2  31   4       79.11       93.91       12.38 o   0.1167E-02
   3  31   4       12.88        5.57       19.63 o   0.7044E-02
   4  31   4       -1.02        1.63        6.83 o   0.7311E-02
  -3  32   4       -3.45        1.95        9.23 o   0.7418E-02
  -2  32   4        4.70        0.65       10.35 o   0.6776E-02
  -1  32   4        1.04        2.37        8.02 o   0.7285E-02
   0  32   4       -1.73        1.72        9.81 o   0.7478E-02
   1  32   4       21.55       11.78       28.62 o   0.7027E-02
   2  32   4       12.82        6.72       20.66 o   0.7306E-02
   3  32   4       16.22        7.42       24.84 o   0.7121E-02
   4  32   4       14.87       32.50       37.20 o   0.2289E-02
  -4  33   4       27.49       45.12       21.38 o   0.1820E-02
  -3  33   4       -4.32        5.51       10.95 o   0.7161E-02
  -2  33   4       -1.67        0.10        6.03 o   0.7573E-02
  -1  33   4       66.26       59.37       21.05 o   0.1820E-02
   0  33   4       -8.37        0.04       23.02 o   0.7568E-02
   1  33   4       53.01       48.90       14.48 o   0.2061E-02
   2  33   4        8.64        0.28       13.15 o   0.7100E-02
   3  33   4       25.44        7.20       12.54 o   0.6424E-02
  -4  34   4       13.27        1.47       37.68 o   0.7462E-02
  -3  34   4       -2.64        0.09        8.73 o   0.7101E-02
  -2  34   4       -6.54        2.99       11.70 o   0.7374E-02
  -1  34   4       87.65       71.75       23.28 o   0.1716E-02
   0  34   4       15.91        4.71       34.52 o   0.6825E-02
   1  34   4       14.99       12.70       10.01 o   0.4422E-02
   2  34   4        5.11        1.07       10.34 o   0.7189E-02
   3  34   4       -1.27        0.84        6.72 o   0.7540E-02
   4  34   4        0.42        2.96        4.72 o   0.7384E-02
  -3  35   4       -3.85        2.89       10.14 o   0.7399E-02
  -2  35   4       -1.63       10.86        5.96 o   0.6965E-02
  -1  35   4       14.49        9.06       15.52 o   0.6983E-02
   0  35   4      170.66      224.46       31.18 o   0.4933E-03
   1  35   4       26.63       31.33       22.58 o   0.4362E-02
   2  35   4        6.53        1.06       10.17 o   0.6520E-02
   3  35   4       13.54        1.35       24.52 o   0.6577E-02
   4  35   4       -2.22        8.57       13.19 o   0.7007E-02
  -3  36   4       14.32        9.27       21.08 o   0.7343E-02
  -2  36   4        0.24        0.19        2.34 o   0.7527E-02
  -1  36   4        0.21        3.66        4.23 o   0.7199E-02
   0  36   4       35.55       20.67       13.04 o   0.5564E-02
   1  36   4       26.12       16.50       15.25 o   0.6960E-02
   2  36   4       17.99        3.30       20.67 o   0.6823E-02
   3  36   4        4.31        9.92       18.17 o   0.6893E-02
  -3  37   4       17.22        9.29       23.11 o   0.7145E-02
  -2  37   4        0.89        0.00        4.18 o   0.7572E-02
  -1  37   4       49.66       31.85       20.32 o   0.2703E-02
   0  37   4      -19.99        5.95       17.34 o   0.6648E-02
   1  37   4       41.41       48.76       14.72 o   0.2269E-02
   2  37   4        9.42        0.10       24.12 o   0.7563E-02
   3  37   4       -1.06        1.22        8.41 o   0.7383E-02
  -3  38   4       -5.45        0.84       12.54 o   0.7513E-02
  -2  38   4        0.50        0.01        3.98 o   0.6783E-02
  -1  38   4       38.82       31.04       17.97 o   0.2097E-02
   0  38   4      -20.79        4.77       17.23 o   0.6565E-02
   1  38   4      107.17      102.93       28.83 o   0.1323E-02
   2  38   4      -11.74        1.29       21.13 o   0.7050E-02
   3  38   4       -2.99        0.52       15.82 o   0.7534E-02
  -3  39   4        0.99        0.15        2.73 o   0.7239E-02
  -2  39   4      -18.66        0.30       31.36 o   0.6559E-02
  -1  39   4       -4.03       12.99       17.17 o   0.6725E-02
   0  39   4        6.03       30.40       21.97 o   0.3010E-02
   1  39   4       27.50       16.12       21.38 o   0.6830E-02
   2  39   4      -13.14        0.10       30.29 o   0.6383E-02
   3  39   4       -7.94        3.55       24.38 o   0.7376E-02
  -3  40   4       16.45       18.13       22.99 o   0.7498E-02
  -2  40   4      -22.42        2.73       17.42 o   0.6260E-02
  -1  40   4      254.58      208.45       39.67 o   0.5705E-03
   0  40   4       -1.30        0.12       10.43 o   0.7569E-02
   1  40   4      191.82      157.92       34.43 o   0.6849E-03
   2  40   4       19.07        3.19       38.65 o   0.6549E-02
   3  40   4       -3.15        7.07       17.12 o   0.6950E-02
  -2  41   4       -5.86        0.22       19.50 o   0.6479E-02
  -1  41   4      114.05      101.78       26.55 o   0.1133E-02
   0  41   4       21.59        4.78       22.64 o   0.6496E-02
   1  41   4      137.45      110.79       30.31 o   0.1032E-02
   2  41   4       -1.38        2.17       10.06 o   0.7472E-02
  -2  42   4       11.05        2.00       32.06 o   0.7423E-02
  -1  42   4        2.67        2.57       16.25 o   0.7077E-02
   0  42   4       11.39        0.73       33.91 o   0.7535E-02
   1  42   4       -3.28       23.98       17.84 o   0.5520E-02
   2  42   4      -10.02        3.27       28.33 o   0.7352E-02
  -2  43   4        3.83        3.59       17.71 o   0.7362E-02
  -1  43   4       37.19       43.38       25.47 o   0.2683E-02
   0  43   4      -21.19        1.38       22.89 o   0.6316E-02
   1  43   4       -2.27       13.52       14.99 o   0.6076E-02
   2  43   4        5.07        3.85       21.51 o   0.7298E-02
  -1  44   4      -22.63        0.35       19.87 o   0.5933E-02
   0  44   4       -6.03        0.07       25.88 o   0.7571E-02
   1  44   4      -12.25        0.60       39.34 o   0.7555E-02
  -1  45   4      -19.66        0.12       20.72 o   0.6094E-02
   0  45   4      -23.68        0.31       23.71 o   0.6101E-02
   1  45   4      -19.41        0.23       50.39 o   0.7553E-02
   0  46   4       -6.24        0.08       28.33 o   0.7568E-02
  -4   1   5      -11.23        7.54       24.99 o   0.7163E-02
  -3   1   5        0.92        0.03        3.33 o   0.6504E-02
  -2   1   5       20.26        3.28       13.88 o   0.6447E-02
  -1   1   5      110.86       77.60       14.66 o   0.1572E-02
   0   1   5       -0.28        1.64        1.49 o   0.7449E-02
   1   1   5        4.36        3.22        2.91 o   0.6797E-02
   2   1   5        0.61        3.08        1.64 o   0.7373E-02
   3   1   5       10.73        2.82       13.03 o   0.7167E-02
   4   1   5       18.40        6.29       26.45 o   0.6689E-02
   5   1   5       34.61       25.00       21.06 o   0.5214E-02
  -4   2   5       11.82       11.19       25.99 o   0.7517E-02
  -3   2   5        1.31        0.38        7.96 o   0.7518E-02
  -2   2   5       -0.84        1.42        3.23 o   0.7467E-02
  -1   2   5       69.17       38.94       12.41 o   0.2005E-02
   0   2   5        7.87        3.09        8.93 o   0.7322E-02
   1   2   5       88.44       68.24        9.35 o   0.1616E-02
   2   2   5        5.53        3.47        7.72 o   0.7452E-02
   3   2   5       14.66        4.25       15.61 o   0.6997E-02
   4   2   5        7.44       27.09       21.97 o   0.4745E-02
  -4   3   5       43.98       49.64       18.47 o   0.2433E-02
  -3   3   5       -7.11        4.89       16.98 o   0.7336E-02
  -2   3   5       10.57        9.35       20.37 o   0.7524E-02
  -1   3   5       70.02       49.75       18.31 o   0.1518E-02
   0   3   5       14.21        8.38       12.00 o   0.7209E-02
   1   3   5      177.44      115.06       13.25 o   0.9877E-03
   2   3   5       11.87        8.04       11.65 o   0.7336E-02
   3   3   5        1.43        0.23        4.87 o   0.7138E-02
   4   3   5       17.92       14.92       10.53 o   0.5131E-02
   5   3   5        3.60       26.98       16.80 o   0.4550E-02
  -5   4   5        0.44        1.34        5.52 o   0.7522E-02
  -4   4   5       29.11       63.14       27.90 o   0.1849E-02
  -3   4   5       -0.71        0.17        3.38 o   0.7558E-02
  -2   4   5      107.83       75.66       16.52 o   0.1429E-02
  -1   4   5       81.20       52.31       11.65 o   0.1335E-02
   0   4   5       16.62       11.85       12.97 o   0.7292E-02
   1   4   5      176.97      134.95       13.23 o   0.9500E-03
   2   4   5       44.34       50.70        8.61 o   0.1962E-02
   3   4   5        9.77        0.23       12.74 o   0.6996E-02
   4   4   5        7.45        6.15       12.21 o   0.7306E-02
  -5   5   5       -7.84        0.04       13.09 o   0.5936E-02
  -4   5   5        0.04        0.04        1.74 o   0.4553E-02
  -3   5   5       13.19       17.25       24.56 o   0.7294E-02
  -1   5   5      191.09      149.79       30.24 o   0.9643E-03
   0   5   5        9.42        0.77        9.46 o   0.7007E-02
   2   5   5      178.64      213.46       13.29 o   0.6656E-03
   3   5   5       14.75       13.81       16.81 o   0.7523E-02
   4   5   5      120.75      118.80       18.58 o   0.1287E-02
  -4   6   5       53.44       49.39       27.63 o   0.2399E-02
  -3   6   5       36.96       39.64       18.14 o   0.3330E-02
  -2   6   5       34.92       27.84       17.04 o   0.1572E-02
  -1   6   5       96.54       61.51       10.75 o   0.1729E-02
   0   6   5       21.59       16.64        8.78 o   0.7222E-02
   1   6   5       41.52       32.42        7.69 o   0.2675E-02
   2   6   5      195.97      203.27       16.71 o   0.7539E-03
   3   6   5        5.22        6.28        9.77 o   0.7395E-02
   4   6   5       11.59       16.75       20.32 o   0.5196E-02
   5   6   5        7.77        0.57       24.67 o   0.7516E-02
  -3   7   5       -8.30        3.71       19.49 o   0.7073E-02
  -1   7   5       13.60        5.79       15.41 o   0.6900E-02
   0   7   5       29.07       24.63        8.58 o   0.5567E-02
   1   7   5        6.59       12.24        8.42 o   0.7265E-02
   3   7   5        3.32       14.27        7.43 o   0.6804E-02
   4   7   5        0.18        1.38        2.93 o   0.7087E-02
  -4   8   5       -0.58        0.17        3.38 o   0.6863E-02
  -3   8   5        0.14        1.19        3.43 o   0.6680E-02
  -2   8   5       29.65       32.30       13.00 o   0.1388E-02
  -1   8   5        5.75        2.37       10.25 o   0.7115E-02
   0   8   5       33.49       30.09        9.21 o   0.3496E-02
   1   8   5       15.79       12.82       13.04 o   0.7445E-02
   2   8   5      238.52      263.20       23.04 o   0.5512E-03
   3   8   5       58.32       61.78       12.15 o   0.2196E-02
   4   8   5       22.26       19.92       29.56 o   0.7437E-02
   5   8   5       12.45        1.38       31.94 o   0.7495E-02
  -4   9   5      -16.09        3.36       37.90 o   0.7368E-02
  -3   9   5       55.63       53.13       17.80 o   0.2587E-02
  -2   9   5       92.02       70.70       16.22 o   0.1721E-02
  -1   9   5        5.04        1.41       10.05 o   0.7390E-02
   0   9   5       -1.62        0.05        4.80 o   0.7574E-02
   1   9   5        3.34        0.64        5.82 o   0.7356E-02
   2   9   5       14.26       13.18        7.14 o   0.4491E-02
   3   9   5        0.00        0.00        2.14 o   0.7293E-02
   4   9   5       17.42        2.87       19.92 o   0.6591E-02
  -4  10   5        5.09       16.57       22.45 o   0.6662E-02
  -3  10   5       -9.90        1.04       19.09 o   0.6643E-02
  -1  10   5        1.79        1.41        5.85 o   0.7400E-02
   0  10   5       -1.85        0.00        4.87 o   0.7576E-02
   1  10   5        3.36        6.49        6.02 o   0.7379E-02
   2  10   5      742.07      761.69       54.18 o   0.1021E-03
   3  10   5        7.72        3.89       11.89 o   0.7359E-02
   4  10   5        9.78        4.17       14.62 o   0.7011E-02
   5  10   5        0.83        0.01        4.67 o   0.7571E-02
  -4  11   5      -15.34       10.90       38.18 o   0.6968E-02
  -3  11   5       -1.63        5.78        8.51 o   0.7249E-02
  -1  11   5        5.25        7.14       12.99 o   0.7368E-02
   0  11   5        2.63        3.19        6.13 o   0.7359E-02
   1  11   5        1.49       17.33        3.53 o   0.6525E-02
   2  11   5      172.04      224.59       18.26 o   0.1439E-03
   3  11   5        0.37        0.48        2.04 o   0.7463E-02
   4  11   5        8.78        6.24       17.39 o   0.7363E-02
  -4  12   5       89.57      113.59       22.59 o   0.1206E-02
  -3  12   5        3.56        1.83       15.95 o   0.7047E-02
  -2  12   5      473.85      404.65       54.12 o   0.2266E-03
  -1  12   5       -5.46        2.89       12.32 o   0.7426E-02
   0  12   5       55.54       48.43        9.64 o   0.2152E-02
   1  12   5        0.01        0.01        1.89 o   0.7533E-02
   2  12   5      254.39      250.36       22.21 o   0.3864E-03
   3  12   5       22.87       30.28       20.45 o   0.4662E-02
   4  12   5       13.30       11.20        6.89 o   0.2997E-02
  -4  13   5       53.82       61.91       23.35 o   0.1087E-02
  -3  13   5       -4.82        7.12       13.76 o   0.7202E-02
  -2  13   5       11.11       14.20        5.30 o   0.5962E-03
  -1  13   5       12.31        1.30       16.05 o   0.6987E-02
   0  13   5        7.87       13.97       10.32 o   0.7081E-02
   1  13   5        2.61        0.19        5.30 o   0.7204E-02
   2  13   5      693.85      846.56       52.39 o   0.7683E-04
   3  13   5        3.81        3.28        8.54 o   0.7530E-02
   4  13   5      242.46      277.47       20.13 o   0.4826E-03
   5  13   5       -9.50        5.29       24.83 o   0.7194E-02
  -4  14   5       32.64       31.41       22.73 o   0.1299E-02
  -3  14   5       19.07       16.51       12.16 o   0.7361E-02
  -2  14   5      265.82      277.11       22.70 o   0.5197E-03
  -1  14   5       14.89        4.11        8.44 o   0.6532E-02
   0  14   5       26.31       13.63        8.67 o   0.6931E-02
   1  14   5       12.75       12.93       14.56 o   0.7551E-02
   2  14   5       81.78       72.78       11.69 o   0.1022E-02
   3  14   5       23.42       18.60       10.11 o   0.7218E-02
   4  14   5      259.83      299.52       20.84 o   0.4426E-03
   5  14   5        1.19        0.27        9.66 o   0.7471E-02
  -4  15   5      371.95      474.47       38.36 o   0.2145E-03
  -3  15   5       -0.57        8.20        2.93 o   0.6979E-02
  -2  15   5        0.05        0.31        2.44 o   0.7171E-02
  -1  15   5       76.20       62.08       12.15 o   0.1965E-02
   0  15   5       15.91       23.38       15.87 o   0.4756E-02
   1  15   5        5.68        8.59       10.19 o   0.6422E-02
   2  15   5       33.74       27.10       10.98 o   0.5876E-02
   3  15   5        8.10        7.13       12.74 o   0.7539E-02
   4  15   5        1.33        1.29        2.98 o   0.1155E-02
  -4  16   5      187.68      196.71       23.16 o   0.5419E-03
  -3  16   5        3.19        5.34        9.76 o   0.7108E-02
  -2  16   5       18.56       10.60       21.42 o   0.7170E-02
  -1  16   5        3.51        6.57        8.39 o   0.7271E-02
   0  16   5      361.98      350.98       26.49 o   0.2718E-03
   1  16   5       44.53       25.84       13.27 o   0.5786E-02
   2  16   5        0.12        1.17        2.09 o   0.7369E-02
   3  16   5        3.61       16.09        8.69 o   0.6788E-02
   4  16   5      283.46      322.34       23.44 o   0.3445E-03
   5  16   5       -3.29        0.24       15.87 o   0.7492E-02
  -4  17   5        3.41        3.69        6.42 o   0.3453E-02
  -3  17   5       -0.04        0.42        2.83 o   0.7313E-02
  -2  17   5        8.18        6.58        6.54 o   0.7173E-02
  -1  17   5       10.48        5.32       15.45 o   0.7197E-02
   0  17   5      963.33      986.38       61.73 o   0.4070E-04
   1  17   5       12.97        6.07       18.62 o   0.7113E-02
   2  17   5       64.46       59.53       11.98 o   0.2241E-02
   3  17   5       21.21       14.45       21.98 o   0.7367E-02
   4  17   5      173.60      135.56       23.59 o   0.1041E-02
  -4  18   5      151.94      168.90       25.74 o   0.9079E-03
  -3  18   5       15.71       14.63       23.65 o   0.7456E-02
  -2  18   5       77.21       80.09       12.23 o   0.1715E-02
  -1  18   5       -1.07        1.39        4.63 o   0.7286E-02
   0  18   5     2034.87     2067.61      130.10 o   0.1018E-04
   1  18   5       13.57       15.83       19.41 o   0.7451E-02
   2  18   5        0.83        0.91        2.24 o   0.7529E-02
   3  18   5        6.68        4.31       15.16 o   0.7305E-02
   4  18   5       10.50       10.07       11.28 o   0.2323E-02
  -4  19   5        4.81        6.51       16.58 o   0.7303E-02
  -3  19   5        0.58        1.34        3.58 o   0.7475E-02
  -2  19   5        1.11        1.52        4.71 o   0.7418E-02
  -1  19   5       57.05       43.74       12.02 o   0.2801E-02
   0  19   5      403.12      361.53       29.95 o   0.2422E-03
   1  19   5        8.37        8.35       14.96 o   0.7509E-02
   2  19   5       30.10       35.95       10.91 o   0.3953E-02
   3  19   5        5.81        2.56       11.03 o   0.7432E-02
   4  19   5       56.01       55.74       13.40 o   0.2339E-02
   5  19   5        9.59        0.36       28.33 o   0.7541E-02
  -4  20   5       18.33       25.85       12.77 o   0.1788E-02
  -3  20   5       -1.71        0.63        7.66 o   0.7477E-02
  -2  20   5        3.02        4.44        7.78 o   0.7317E-02
  -1  20   5        0.00        0.00        2.19 o   0.7281E-02
   0  20   5       12.30        3.58       15.35 o   0.7005E-02
   1  20   5       58.64       48.51       13.71 o   0.2674E-02
   2  20   5        0.61        0.05        2.24 o   0.6885E-02
   3  20   5       16.57        3.43       19.03 o   0.6929E-02
   4  20   5      206.97      158.61       37.20 o   0.8524E-03
   5  20   5        0.29        0.06        3.43 o   0.7572E-02
  -4  21   5      131.98      181.19       23.99 o   0.7654E-03
  -3  21   5       10.94        1.37       20.73 o   0.7060E-02
  -2  21   5        2.76        8.04        7.28 o   0.6967E-02
  -1  21   5        2.49        4.32        6.90 o   0.7173E-02
   0  21   5      118.20      118.39       16.22 o   0.1037E-02
   1  21   5       -0.64       10.12        2.54 o   0.6970E-02
   2  21   5       25.25       16.20       10.49 o   0.6979E-02
   3  21   5        1.01        0.21        4.79 o   0.7554E-02
   4  21   5        9.58       10.81        6.16 o   0.2171E-02
  -4  22   5       44.74       48.91       19.96 o   0.2327E-02
  -3  22   5        4.60        3.27       10.45 o   0.7365E-02
  -2  22   5       87.38       77.39       12.09 o   0.1707E-02
  -1  22   5       -1.03        7.38        4.24 o   0.6819E-02
   0  22   5       73.83       78.68       14.53 o   0.1462E-02
   1  22   5       22.88       26.18       24.74 o   0.6060E-02
   2  22   5        0.04        0.03        0.99 o   0.7254E-02
   3  22   5       -3.88        1.58        9.01 o   0.7392E-02
   4  22   5       34.66       24.91       14.05 o   0.3501E-02
  -4  23   5        0.42        1.19        3.98 o   0.6626E-02
  -3  23   5       21.24       13.39       22.46 o   0.7207E-02
  -2  23   5       35.60       35.05       14.24 o   0.1829E-02
  -1  23   5       33.84       33.54       11.57 o   0.4010E-02
   0  23   5        8.37        2.59       15.25 o   0.7208E-02
   1  23   5        0.01        0.01        2.69 o   0.7535E-02
   2  23   5      148.13      146.83       13.31 o   0.1036E-02
   3  23   5        4.78        4.45       11.31 o   0.7558E-02
   4  23   5       82.37       64.34       16.25 o   0.1939E-02
  -4  24   5        7.43       13.72       21.96 o   0.4728E-02
  -3  24   5       -5.25       12.27       12.53 o   0.6960E-02
  -2  24   5       17.86       13.32        7.98 o   0.5255E-02
  -1  24   5       20.01        9.32        9.79 o   0.6815E-02
   0  24   5       19.60        4.23       15.41 o   0.6579E-02
   1  24   5        3.72        9.28        9.97 o   0.7056E-02
   2  24   5       79.48       58.94       10.64 o   0.1973E-02
   3  24   5        2.83        1.72        7.36 o   0.7370E-02
   4  24   5       78.04       64.46       15.81 o   0.1862E-02
  -4  25   5        6.40       17.63       19.13 o   0.6733E-02
  -3  25   5       -1.40        1.95        6.35 o   0.7403E-02
  -2  25   5       87.97      122.49       15.86 o   0.1064E-02
  -1  25   5       -0.08        0.42        2.83 o   0.7459E-02
   0  25   5        2.09        0.72       13.81 o   0.7538E-02
   1  25   5       -3.67        4.77        9.90 o   0.7310E-02
   2  25   5        2.59        1.72        3.52 o   0.3465E-02
   3  25   5        6.74        7.94       11.36 o   0.7525E-02
   4  25   5       -0.68        2.70        3.63 o   0.7236E-02
  -3  26   5        2.85       12.10        9.24 o   0.4475E-02
  -2  26   5       16.52       27.33       23.44 o   0.3871E-02
  -1  26   5       -1.95        0.49        5.70 o   0.7213E-02
   0  26   5       -3.72        6.58       17.65 o   0.7220E-02
   1  26   5        6.80        6.57       14.78 o   0.7202E-02
   2  26   5       33.82       30.77       14.46 o   0.3572E-02
   3  26   5       44.82       68.47       13.32 o   0.1736E-02
   4  26   5        5.85        1.67       13.96 o   0.7068E-02
  -3  27   5       21.38       66.32       27.13 o   0.1703E-02
  -2  27   5        2.49        2.27        8.47 o   0.7274E-02
  -1  27   5       -3.86        2.94       13.28 o   0.7380E-02
   0  27   5       12.92        6.62       25.74 o   0.7185E-02
   1  27   5        1.52        8.20        6.86 o   0.7172E-02
   2  27   5       10.30       14.20       18.83 o   0.7396E-02
   3  27   5        0.02        0.04        2.93 o   0.7137E-02
   4  27   5       10.68        5.60       28.61 o   0.7251E-02
  -3  28   5       -1.71        6.54        7.16 o   0.7095E-02
  -2  28   5        1.23        0.89        5.08 o   0.7434E-02
  -1  28   5        8.06        0.87        8.75 o   0.5679E-02
   0  28   5        4.43        0.05       12.56 o   0.7574E-02
   1  28   5       23.80       13.72       28.14 o   0.7142E-02
   2  28   5       28.48       20.20       14.86 o   0.7145E-02
   3  28   5        5.29       15.27       11.21 o   0.6786E-02
   4  28   5      -15.47        0.87       14.08 o   0.6155E-02
  -3  29   5       -7.52        5.73       14.45 o   0.7388E-02
  -2  29   5       -3.20       10.33        9.07 o   0.7029E-02
  -1  29   5       21.15        6.56       17.38 o   0.6425E-02
   0  29   5        4.25        0.13       13.11 o   0.7571E-02
   1  29   5       72.28       11.89       15.22 o   0.4431E-02
   2  29   5        3.58        2.11       10.92 o   0.7394E-02
   3  29   5        7.54       16.02       14.75 o   0.7125E-02
   4  29   5        0.00        1.54        4.38 o   0.7439E-02
  -3  30   5       15.14        9.45       22.44 o   0.7146E-02
  -2  30   5        2.92        3.98        9.00 o   0.7301E-02
  -1  30   5       12.89        4.03       13.92 o   0.6411E-02
   0  30   5       -6.03        1.53       14.65 o   0.7479E-02
   1  30   5       53.59       22.26       15.29 o   0.5876E-02
   2  30   5       15.38        2.23       24.18 o   0.6601E-02
   3  30   5       12.48       18.74       22.13 o   0.7156E-02
   4  30   5        1.40        2.25       10.25 o   0.7463E-02
  -3  31   5       -0.29        1.49        2.69 o   0.7477E-02
  -2  31   5      -15.69        0.40       20.09 o   0.6672E-02
  -1  31   5       84.39       42.34       24.67 o   0.2740E-02
   0  31   5       -4.07        3.99       21.66 o   0.7325E-02
   1  31   5        4.01        3.63       17.53 o   0.6852E-02
   2  31   5       -5.37        0.23       20.51 o   0.7566E-02
   3  31   5        2.02        2.41        7.63 o   0.7445E-02
  -3  32   5      -20.89        7.37       25.00 o   0.7014E-02
  -2  32   5       -7.05        0.34       14.00 o   0.6608E-02
  -1  32   5       31.55       32.54       22.90 o   0.4383E-02
   0  32   5        3.23        5.71       17.52 o   0.7205E-02
   1  32   5       -1.48        2.10        9.91 o   0.7018E-02
   2  32   5       15.17        2.28       22.47 o   0.6893E-02
   3  32   5        0.51        0.04        2.14 o   0.6483E-02
  -3  33   5      -15.71        0.53       21.68 o   0.6701E-02
  -2  33   5        5.37        0.26       19.58 o   0.7551E-02
  -1  33   5        6.02        7.84       21.96 o   0.6958E-02
   0  33   5        2.92        6.05       17.68 o   0.7168E-02
   1  33   5       -8.49       14.46       16.52 o   0.7225E-02
   2  33   5       -4.12        1.27       11.71 o   0.7513E-02
   3  33   5        9.90        0.25       26.28 o   0.7566E-02
  -3  34   5        1.27        0.69        6.60 o   0.7483E-02
  -2  34   5       -4.17        0.45       15.64 o   0.6724E-02
  -1  34   5        0.00        0.00        4.57 o   0.7049E-02
   0  34   5       46.77       41.08       26.52 o   0.2395E-02
   1  34   5       26.23       36.18       22.41 o   0.3639E-02
   2  34   5       -3.68        5.65       17.93 o   0.7272E-02
   3  34   5        9.53        0.08       12.28 o   0.5977E-02
  -3  35   5      -10.96        0.05       18.44 o   0.6955E-02
  -2  35   5       -5.04        1.03       18.98 o   0.7439E-02
  -1  35   5        0.24        9.62        4.57 o   0.7069E-02
   0  35   5      156.10      131.43       33.55 o   0.8994E-03
   1  35   5        7.25        1.75       25.44 o   0.7362E-02
   2  35   5        8.08        4.55       17.25 o   0.7307E-02
   3  35   5       -7.80        0.02       26.67 o   0.7572E-02
  -3  36   5      -13.02        1.98       20.81 o   0.6971E-02
  -2  36   5       11.12        0.73       30.18 o   0.7519E-02
  -1  36   5      -10.95        0.22       12.50 o   0.5898E-02
   0  36   5      223.47      166.51       40.14 o   0.6561E-03
   1  36   5       -2.60        1.68        9.61 o   0.7491E-02
   2  36   5       -4.47        1.73       19.55 o   0.7497E-02
   3  36   5       -1.89        0.47       12.04 o   0.7523E-02
  -2  37   5       -0.28        0.01        4.43 o   0.7556E-02
  -1  37   5       -2.36        1.20       13.74 o   0.7392E-02
   0  37   5        1.97       10.24       16.04 o   0.6873E-02
   1  37   5       13.40        9.06       33.49 o   0.7096E-02
   2  37   5       21.33        1.17       41.79 o   0.6569E-02
  -2  38   5      -21.39        2.65       42.31 o   0.6580E-02
  -1  38   5        9.77        8.16       29.22 o   0.7199E-02
   0  38   5       20.39       42.69       25.60 o   0.2098E-02
   1  38   5        0.51        1.04        4.72 o   0.7426E-02
   2  38   5       -2.63        0.61       15.49 o   0.7519E-02
  -2  39   5       -2.52        2.09       14.53 o   0.7416E-02
  -1  39   5      -20.42        4.62       44.49 o   0.7313E-02
   0  39   5       74.58       84.05       28.34 o   0.1325E-02
   1  39   5       -6.22        1.13       24.81 o   0.7460E-02
   2  39   5       30.55        4.73       24.74 o   0.6139E-02
  -2  40   5       10.94       31.53       34.55 o   0.3774E-02
  -1  40   5       -3.43        1.23       18.79 o   0.7408E-02
   0  40   5       57.52       56.82       28.66 o   0.1970E-02
   1  40   5        1.13        5.73       10.98 o   0.7262E-02
   2  40   5        0.28        1.56        4.77 o   0.7018E-02
  -1  41   5      -18.21        1.77       17.82 o   0.6143E-02
   0  41   5      -10.81        1.42       41.53 o   0.7493E-02
   1  41   5      -20.15        4.71       45.54 o   0.7284E-02
  -1  42   5        7.12        0.71       29.19 o   0.7546E-02
   0  42   5       18.84        5.96       55.25 o   0.7151E-02
   1  42   5        1.67        0.22       13.87 o   0.7555E-02
  -3   0   6       -4.30        0.24       22.27 o   0.7574E-02
  -2   0   6        0.03        0.00        4.48 o   0.6591E-02
  -1   0   6        0.28        0.04        3.63 o   0.6797E-02
   0   0   6       54.89       45.40       19.16 o   0.2176E-02
   1   0   6       15.80        8.64       19.37 o   0.7134E-02
   2   0   6       -4.36        2.29       10.38 o   0.7436E-02
   3   0   6       29.40        0.18       20.49 o   0.5624E-02
   5   0   6        6.97        2.19       13.13 o   0.6671E-02
  -4   1   6      -16.87        0.16       44.12 o   0.7575E-02
  -3   1   6       10.83        4.50       37.32 o   0.7149E-02
  -2   1   6       -2.15        1.21        8.46 o   0.7406E-02
  -1   1   6       -3.51        2.40        8.95 o   0.7423E-02
   0   1   6       -1.40        0.70        6.24 o   0.7547E-02
   1   1   6        9.92       12.84       10.96 o   0.7380E-02
   2   1   6        7.67        7.43        9.64 o   0.7559E-02
   3   1   6       18.29       10.80       28.07 o   0.7166E-02
   5   1   6       18.50       11.74       41.92 o   0.6981E-02
  -4   2   6       -7.30        0.16       26.87 o   0.7559E-02
  -3   2   6       -0.42        0.01        3.78 o   0.6709E-02
  -2   2   6        4.39        1.44       12.70 o   0.7432E-02
  -1   2   6        4.01        2.67        6.77 o   0.7061E-02
   0   2   6       13.88       10.81       21.49 o   0.7411E-02
   1   2   6       70.50       56.41       10.02 o   0.2175E-02
   2   2   6       -1.53        4.49        4.31 o   0.7303E-02
   3   2   6       13.15        1.67       22.72 o   0.7007E-02
  -3   3   6       -8.12        4.57       29.75 o   0.7349E-02
  -2   3   6        3.56        3.01       11.45 o   0.7355E-02
  -1   3   6      145.76      123.63       16.81 o   0.1044E-02
   0   3   6       10.24        7.74       18.14 o   0.7355E-02
   1   3   6       84.76       78.61       10.07 o   0.1307E-02
   2   3   6        0.27        0.02        2.19 o   0.7120E-02
   3   3   6        1.71        2.73        8.07 o   0.7405E-02
   4   3   6       11.82        0.04       12.31 o   0.5774E-02
  -3   4   6       43.74       27.86       26.31 o   0.5224E-02
  -2   4   6       13.16        7.93       22.73 o   0.7248E-02
  -1   4   6       80.49       59.02       15.17 o   0.1824E-02
   0   4   6        5.00        5.44       11.56 o   0.7209E-02
   1   4   6       30.93       24.85        7.74 o   0.3159E-02
   2   4   6        0.11        0.03        2.19 o   0.7234E-02
   3   4   6        0.01        0.00        3.33 o   0.7032E-02
  -4   5   6        0.00        0.00        5.47 o   0.7537E-02
  -3   5   6       66.15       82.34       17.79 o   0.1315E-02
  -2   5   6        1.79        7.45        7.97 o   0.7105E-02
  -1   5   6       21.33       18.57       11.48 o   0.2053E-02
   0   5   6        0.69        5.98        2.19 o   0.7152E-02
   1   5   6      219.70      159.95       22.11 o   0.8438E-03
   2   5   6       10.55        4.27       14.54 o   0.7081E-02
   3   5   6      105.90      100.37       18.42 o   0.1237E-02
   4   5   6        6.95        3.19       22.02 o   0.7436E-02
   5   5   6        3.55        3.28       18.17 o   0.7427E-02
  -4   6   6        4.10        0.68       20.15 o   0.7517E-02
  -3   6   6        6.25       10.20       16.65 o   0.7135E-02
  -2   6   6        0.70        0.38        3.13 o   0.7299E-02
  -1   6   6      199.24      206.76       21.06 o   0.6661E-03
   0   6   6        1.73        3.38        5.62 o   0.7362E-02
   1   6   6      118.74      116.92       14.09 o   0.9247E-03
   2   6   6       23.62       20.30       22.23 o   0.7424E-02
   3   6   6       59.66       47.94       14.60 o   0.2602E-02
  -4   7   6        0.82        3.26        5.42 o   0.7232E-02
  -3   7   6      118.65       89.79       20.58 o   0.1389E-02
  -2   7   6       20.49       15.34       28.36 o   0.7289E-02
  -1   7   6       56.91       40.50       14.25 o   0.2790E-02
   0   7   6        9.42       12.73       12.51 o   0.7214E-02
   1   7   6       26.03       21.81        8.63 o   0.5260E-02
   2   7   6        1.37        2.34        5.13 o   0.7227E-02
   3   7   6       22.06       14.31        7.94 o   0.3152E-02
   4   7   6       27.75       11.96       22.00 o   0.6689E-02
  -4   8   6      -13.85        4.65       25.17 o   0.7066E-02
  -2   8   6        1.15        1.67        6.82 o   0.7354E-02
  -1   8   6       31.83       24.49       14.59 o   0.6352E-02
   0   8   6        7.39        4.54       11.08 o   0.7416E-02
   1   8   6       11.60       14.99       13.89 o   0.7348E-02
   2   8   6        6.58        8.67       10.72 o   0.7416E-02
   3   8   6      166.79      188.82       23.12 o   0.4184E-03
   4   8   6        1.08        0.07        6.53 o   0.6540E-02
  -2   9   6        4.48        7.03       12.84 o   0.7148E-02
  -1   9   6        0.44        0.65        2.93 o   0.6962E-02
   0   9   6        5.60        6.07        9.42 o   0.7549E-02
   1   9   6       25.61       40.97       10.07 o   0.3122E-02
   2   9   6       14.71        6.67       17.16 o   0.7041E-02
   3   9   6      596.83      772.32       46.16 o   0.8682E-04
  -3  10   6      454.36      399.71       53.00 o   0.2440E-03
  -2  10   6       35.30       12.91       15.36 o   0.6412E-02
  -1  10   6       41.04       24.17       13.38 o   0.4576E-02
   0  10   6       24.11       11.50        9.28 o   0.6756E-02
   1  10   6       55.65       33.05       13.35 o   0.3130E-02
   2  10   6       -0.60        1.15        2.24 o   0.7348E-02
   3  10   6      197.36      225.29       26.55 o   0.4013E-03
  -4  11   6       -0.89        0.05        5.27 o   0.7523E-02
  -2  11   6       13.20       29.05       23.49 o   0.4105E-02
  -1  11   6      148.98      107.49       19.42 o   0.1180E-02
   0  11   6       18.08       10.66       17.34 o   0.7055E-02
   1  11   6       21.27       13.99        8.26 o   0.2736E-02
   2  11   6       14.12        8.29        8.60 o   0.6971E-02
   3  11   6       14.64       14.73        7.61 o   0.2116E-02
   4  11   6        6.16        3.65       21.72 o   0.7414E-02
  -4  12   6       -1.00        0.13        3.58 o   0.7564E-02
  -3  12   6       58.44       60.48       17.49 o   0.1952E-02
  -2  12   6       -2.64        3.91       10.34 o   0.7006E-02
  -1  12   6      485.58      463.57       56.98 o   0.2255E-03
   0  12   6       39.30       40.00        9.98 o   0.2693E-02
   1  12   6      108.08      117.77       15.51 o   0.6290E-03
   2  12   6       30.89       27.90       11.61 o   0.5919E-02
   3  12   6       59.77       32.05       11.53 o   0.2382E-02
   4  12   6       -2.15        0.09        9.04 o   0.7572E-02
  -3  13   6       35.69       38.91       17.23 o   0.1701E-02
  -2  13   6      -10.92        3.01       20.37 o   0.7110E-02
  -1  13   6      260.74      287.34       40.15 o   0.2486E-03
   0  13   6       19.22        4.17        9.16 o   0.6613E-02
   1  13   6      617.99      642.71       49.45 o   0.1174E-03
   2  13   6        3.03        1.49        9.87 o   0.7444E-02
   3  13   6      140.56      152.27       27.12 o   0.9442E-03
   4  13   6       13.85        9.02       32.94 o   0.7076E-02
  -3  14   6       86.50       66.22       26.82 o   0.1747E-02
  -2  14   6      -10.75        1.29       20.87 o   0.7087E-02
  -1  14   6       79.65       68.04       15.98 o   0.1089E-02
   0  14   6       -3.55        0.04        7.50 o   0.7345E-02
   1  14   6      252.49      245.58       23.70 o   0.6019E-03
   2  14   6        4.05        0.15       12.21 o   0.6877E-02
   3  14   6       25.63       22.66       12.08 o   0.3393E-02
   4  14   6        3.74        4.33       15.00 o   0.7204E-02
  -3  15   6       49.01       47.50       25.07 o   0.2724E-02
  -2  15   6       -3.10        0.26       11.39 o   0.7076E-02
  -1  15   6      500.67      490.16       40.06 o   0.2274E-03
   0  15   6        2.49        0.92        6.12 o   0.7506E-02
   2  15   6        4.63        2.23       12.42 o   0.7457E-02
   3  15   6        0.77        0.49        3.08 o   0.7156E-02
   4  15   6       12.84        1.43       27.08 o   0.7463E-02
  -3  16   6      -11.32        0.68       12.72 o   0.5681E-02
  -2  16   6       12.59       10.55       22.58 o   0.7447E-02
  -1  16   6      415.55      381.56       52.71 o   0.2189E-03
   0  16   6        2.78        9.67        6.63 o   0.6981E-02
   1  16   6      398.74      418.53       35.75 o   0.2032E-03
   2  16   6        3.22        1.71       10.71 o   0.7353E-02
   3  16   6       10.45        6.27       21.21 o   0.7314E-02
   4  16   6        0.09        0.00        2.98 o   0.7572E-02
  -2  17   6       -3.40        2.58       12.29 o   0.7386E-02
  -1  17   6       25.89       26.78        9.11 o   0.1426E-02
   0  17   6       13.88        5.86       18.90 o   0.7035E-02
   1  17   6      289.52      270.76       27.07 o   0.5381E-03
   2  17   6        5.48        4.26       20.02 o   0.7320E-02
   3  17   6       18.14        7.79       20.33 o   0.7062E-02
   4  17   6        7.99        2.43       16.02 o   0.7423E-02
  -3  18   6       -1.44        1.08       11.47 o   0.7455E-02
  -2  18   6       -0.02        0.00        3.08 o   0.7526E-02
  -1  18   6        0.09        0.19        2.34 o   0.7358E-02
   0  18   6       10.52       16.55       16.78 o   0.7173E-02
   1  18   6       55.56       39.75       14.08 o   0.3713E-02
   2  18   6        6.18        3.79       14.34 o   0.7397E-02
   3  18   6       12.26        4.15       17.06 o   0.7171E-02
   4  18   6       14.34        0.50       33.14 o   0.7561E-02
  -2  19   6       13.10        7.75       34.19 o   0.7130E-02
  -1  19   6       40.37       32.40       12.01 o   0.3389E-02
   0  19   6        0.69        8.47        2.54 o   0.6971E-02
   1  19   6       34.00       28.54       12.76 o   0.3568E-02
   2  19   6        0.37        2.45        2.69 o   0.7357E-02
   3  19   6       -1.42        1.75        8.40 o   0.7380E-02
   4  19   6        2.52        8.40        8.52 o   0.7061E-02
  -3  20   6       -5.05        1.75       22.57 o   0.7287E-02
  -2  20   6       -1.15        0.31        6.93 o   0.7459E-02
  -1  20   6       40.41       45.98       10.75 o   0.1252E-02
   0  20   6        9.42       12.44       16.17 o   0.7447E-02
   1  20   6      258.79      248.11       27.20 o   0.5863E-03
   2  20   6       10.32        7.31       19.17 o   0.7382E-02
   3  20   6       19.74       13.51       21.21 o   0.7234E-02
   4  20   6        0.98        0.05        3.88 o   0.6468E-02
  -3  21   6       -0.49        0.01        4.77 o   0.7545E-02
  -2  21   6        9.42        2.10       19.53 o   0.7051E-02
  -1  21   6      330.55      343.10       30.74 o   0.3326E-03
   0  21   6       -6.92        0.69       13.08 o   0.7166E-02
   1  21   6      182.58      185.93       24.19 o   0.5688E-03
   2  21   6        6.24        2.10       14.41 o   0.7429E-02
   3  21   6       17.40        1.42       26.14 o   0.6770E-02
   4  21   6       17.43       12.24       26.58 o   0.7290E-02
  -3  22   6        6.55        5.01       26.48 o   0.7246E-02
  -2  22   6       -0.30        3.55        4.57 o   0.7306E-02
  -1  22   6      271.27      210.12       36.04 o   0.6804E-03
   0  22   6       13.56        8.36       19.41 o   0.7205E-02
   1  22   6        5.14        7.89        8.35 o   0.1971E-02
   2  22   6       12.61        7.69       26.49 o   0.7258E-02
   3  22   6       -5.09        3.95       10.77 o   0.7490E-02
  -2  23   6        1.61        7.60       11.75 o   0.7216E-02
  -1  23   6       28.52       31.13       12.22 o   0.1462E-02
   0  23   6        6.46        7.22       13.91 o   0.7549E-02
   1  23   6      262.99      245.78       37.09 o   0.6119E-03
   2  23   6        0.77        0.96        3.78 o   0.7400E-02
   3  23   6       28.21       23.31       17.96 o   0.3704E-02
  -2  24   6        0.03        0.01        4.67 o   0.7314E-02
   0  24   6       31.98       40.83       12.94 o   0.2435E-02
   1  24   6       55.42       56.86       14.81 o   0.1618E-02
   2  24   6       12.46       18.37       21.07 o   0.7269E-02
   3  24   6       56.08       60.79       16.38 o   0.2104E-02
  -2  25   6       -8.38        5.71       17.28 o   0.7391E-02
   0  25   6       12.92        0.22       20.38 o   0.6740E-02
   1  25   6        0.03        0.01        1.39 o   0.6547E-02
   2  25   6       -1.45        4.90        9.47 o   0.7276E-02
   3  25   6        3.77        2.89       12.55 o   0.7309E-02
  -2  26   6        1.01        1.64        4.80 o   0.7415E-02
  -1  26   6        0.21        0.02        1.99 o   0.5361E-02
   0  26   6        4.61        0.28       12.60 o   0.7571E-02
   1  26   6        9.50       13.49       27.90 o   0.6947E-02
   2  26   6      -10.77        3.76       27.74 o   0.7342E-02
   3  26   6       33.46       52.66       21.29 o   0.1699E-02
  -2  27   6      -11.77       11.95       20.13 o   0.7528E-02
  -1  27   6        1.04        1.78        6.59 o   0.7384E-02
   0  27   6        7.15        0.60       23.40 o   0.7543E-02
   1  27   6       23.07        7.08       44.42 o   0.6695E-02
   2  27   6      -13.18        2.45       13.00 o   0.6273E-02
  -3  28   6       -3.24       11.70       14.85 o   0.6921E-02
  -2  28   6       -2.51        1.80        9.45 o   0.7373E-02
  -1  28   6       -5.42        2.88       24.54 o   0.7423E-02
   0  28   6       43.24        0.18       20.27 o   0.4984E-02
   1  28   6       12.35        1.41       22.37 o   0.6706E-02
   2  28   6       26.81        6.82       14.42 o   0.6505E-02
   3  28   6       -2.20        1.85       13.85 o   0.7314E-02
  -3  29   6      -25.52        3.43       20.10 o   0.6464E-02
  -2  29   6       -3.01        0.90        9.84 o   0.7514E-02
  -1  29   6        5.70        1.53       24.93 o   0.7447E-02
   0  29   6        0.56        1.96        5.47 o   0.7406E-02
   1  29   6        7.26        3.00       24.11 o   0.7420E-02
   2  29   6       10.84        1.20       29.46 o   0.7487E-02
   3  29   6        4.97        0.33       22.83 o   0.7515E-02
  -2  30   6       -2.80        2.53       14.81 o   0.7459E-02
  -1  30   6      -11.15        0.79       33.87 o   0.7538E-02
   0  30   6       31.98        0.93       26.43 o   0.5637E-02
   1  30   6        6.13        0.50       15.27 o   0.7535E-02
   2  30   6        9.77        0.72       29.52 o   0.7494E-02
  -2  31   6      -10.10        0.38       12.96 o   0.6351E-02
  -1  31   6       28.77       14.99       24.00 o   0.6711E-02
   0  31   6        3.39        0.45       18.68 o   0.7539E-02
   1  31   6       13.16       14.60       21.65 o   0.7501E-02
   2  31   6        5.87        2.06       23.61 o   0.7479E-02
  -2  32   6      -13.39        0.43       32.02 o   0.7558E-02
  -1  32   6        4.00        1.00       22.08 o   0.7409E-02
   0  32   6      -15.22        2.81       43.85 o   0.7380E-02
   1  32   6       -3.26        7.72       16.71 o   0.7188E-02
   2  32   6       -3.01        0.19       16.73 o   0.7563E-02
  -2  33   6       -3.95        0.19       18.38 o   0.7558E-02
  -1  33   6       21.29        7.89       31.66 o   0.6863E-02
   0  33   6      -17.71        0.21       46.46 o   0.7566E-02
   1  33   6      -10.69        3.18       28.61 o   0.7274E-02
   2  33   6      -27.87        0.26       19.43 o   0.5942E-02
  -2  34   6       -1.84        0.28       12.54 o   0.7549E-02
  -1  34   6       73.10       60.54       29.76 o   0.1967E-02
   0  34   6      -24.54        0.47       24.14 o   0.6048E-02
   1  34   6       20.46       17.70       18.44 o   0.4319E-02
   2  34   6        0.00        0.83        5.12 o   0.7511E-02
  -1  35   6       13.56        4.11       17.58 o   0.6465E-02
   0  35   6      -31.00        2.35       24.92 o   0.5817E-02
   1  35   6        3.02       19.64       16.43 o   0.6561E-02
  -1  36   6       -5.63        1.35       25.96 o   0.7291E-02
   0  36   6        3.89        0.03       24.33 o   0.7570E-02
   1  36   6       20.84       14.73       48.12 o   0.6850E-02
  -1  37   6      -35.83        6.04       26.19 o   0.5890E-02
   0  37   6      -11.39        2.80       37.93 o   0.7365E-02
   1  37   6       -3.82        3.13       18.66 o   0.7316E-02
   0  38   6       -9.69        5.83       38.07 o   0.7172E-02
  -3   1   7       -1.57        0.09        9.34 o   0.6866E-02
  -2   1   7       -6.11        0.88       14.75 o   0.6813E-02
  -1   1   7       -5.48        9.29       13.04 o   0.6897E-02
   0   1   7        3.07        4.75       10.29 o   0.7291E-02
   1   1   7       22.68       11.83       10.42 o   0.6886E-02
   2   1   7        3.06        5.49       16.54 o   0.7291E-02
   3   1   7       16.46        2.65       41.16 o   0.7461E-02
  -3   2   7      -18.75        0.84       46.94 o   0.7523E-02
  -2   2   7       -0.42        0.00        3.13 o   0.7575E-02
  -1   2   7       -6.40        3.69       13.84 o   0.7434E-02
   0   2   7       -0.69        0.69        2.88 o   0.7516E-02
   1   2   7        7.75        2.71       12.74 o   0.7201E-02
  -3   3   7      -17.50        5.53       20.80 o   0.6608E-02
  -2   3   7       -9.70        9.75       18.58 o   0.7566E-02
  -1   3   7        8.42       17.78       17.61 o   0.6927E-02
   0   3   7       -4.25        0.36       11.27 o   0.7523E-02
   1   3   7       21.49       14.90       10.14 o   0.7124E-02
   2   3   7       40.16       22.87       15.13 o   0.6535E-02
  -3   4   7      -39.43        1.37       25.60 o   0.5575E-02
  -2   4   7        0.92        3.51        3.08 o   0.7185E-02
  -1   4   7       26.62       27.31       12.83 o   0.3773E-02
   0   4   7       13.24        0.10       21.35 o   0.6725E-02
   1   4   7       36.72       45.21       12.05 o   0.2464E-02
   2   4   7       63.21       15.47       18.19 o   0.5281E-02
   3   4   7        8.18        0.44       20.19 o   0.6840E-02
  -3   5   7       -7.22        3.71       19.77 o   0.7364E-02
  -2   5   7       12.21       22.77       22.94 o   0.3368E-02
  -1   5   7        1.39        0.97        6.79 o   0.7479E-02
   0   5   7       -8.12        0.61       15.87 o   0.7086E-02
   1   5   7       14.46        1.35       26.85 o   0.6780E-02
   2   5   7      108.86       65.70       20.75 o   0.1627E-02
   3   5   7      -10.82        1.46       32.72 o   0.7443E-02
   4   5   7       -3.90       17.57       19.05 o   0.6481E-02
  -3   6   7       -9.05        2.50       20.34 o   0.7116E-02
  -2   6   7      150.24      147.96       21.94 o   0.8305E-03
  -1   6   7        0.98        1.70        2.93 o   0.7401E-02
   0   6   7      -11.69        0.57       19.04 o   0.6870E-02
   1   6   7        7.94        5.84       18.78 o   0.7209E-02
   2   6   7      199.30      183.55       22.46 o   0.6871E-03
   3   6   7        8.93        2.95       30.32 o   0.7378E-02
  -3   7   7       -8.95        6.59       27.08 o   0.7186E-02
  -2   7   7      181.36      134.99       24.11 o   0.8453E-03
  -1   7   7        9.36       10.97       18.56 o   0.7475E-02
   0   7   7        6.46        1.40       13.15 o   0.7233E-02
   1   7   7       13.07        1.87       11.15 o   0.6100E-02
   2   7   7      110.91      110.80       25.14 o   0.1079E-02
   3   7   7       -2.28        4.68       14.27 o   0.7230E-02
  -3   8   7      -18.36        0.54       28.98 o   0.6429E-02
  -2   8   7       97.54      109.05       19.64 o   0.1217E-02
  -1   8   7       16.68        8.22       25.59 o   0.6997E-02
   0   8   7        6.24        0.18       13.67 o   0.7167E-02
   1   8   7        2.91        6.53       11.87 o   0.7121E-02
   2   8   7       73.91       52.99       15.39 o   0.1542E-02
   3   8   7       -5.02        0.56       22.74 o   0.7534E-02
  -3   9   7       15.94       25.55       37.72 o   0.3625E-02
  -2   9   7       28.30       18.35       16.93 o   0.6997E-02
  -1   9   7        0.00        7.12        2.98 o   0.7194E-02
   0   9   7        3.72        1.24        9.78 o   0.7515E-02
   1   9   7       -5.77        3.77       13.38 o   0.7385E-02
   2   9   7       20.01       11.24       12.90 o   0.6932E-02
   3   9   7        7.86       25.39       28.72 o   0.4018E-02
  -3  10   7      -17.09        2.11       11.51 o   0.5983E-02
  -2  10   7      224.54      227.18       26.82 o   0.5678E-03
  -1  10   7      -15.65       11.61       29.90 o   0.7317E-02
   0  10   7       -6.46        0.03       12.90 o   0.7154E-02
   1  10   7       45.47       16.05       16.76 o   0.5842E-02
   2  10   7      192.97      157.90       33.16 o   0.6635E-03
   3  10   7       17.11        8.75       45.66 o   0.7048E-02
  -3  11   7        9.45       11.36       31.79 o   0.6644E-02
  -2  11   7      219.51      185.84       26.52 o   0.6743E-03
  -1  11   7       16.24       15.01       25.65 o   0.7512E-02
   0  11   7        5.40        2.79       11.55 o   0.7404E-02
   1  11   7       15.27        6.60       13.99 o   0.6868E-02
   2  11   7      159.48      123.07       31.40 o   0.8163E-03
   3  11   7       34.47       23.47       18.68 o   0.5947E-02
  -3  12   7       10.17       12.88       38.05 o   0.6865E-02
  -2  12   7      357.21      362.34       35.71 o   0.2539E-03
  -1  12   7       -0.37        0.06        3.03 o   0.7520E-02
   0  12   7        9.42        4.39       20.45 o   0.7334E-02
   1  12   7       44.84        3.24       19.31 o   0.5585E-02
   2  12   7      404.23      406.92       51.99 o   0.2280E-03
   3  12   7       12.79        4.13       21.70 o   0.6725E-02
  -3  13   7      -30.42        6.49       19.75 o   0.5795E-02
  -2  13   7      125.12      106.52       21.14 o   0.9762E-03
  -1  13   7       25.09       24.32       15.44 o   0.7538E-02
   1  13   7        0.61        0.44        2.98 o   0.7414E-02
   2  13   7      209.63      171.72       33.12 o   0.7346E-03
   3  13   7       31.96       10.90       18.55 o   0.6349E-02
  -1  14   7       14.72       10.84       24.04 o   0.7267E-02
   0  14   7       19.99        0.87       16.45 o   0.6333E-02
   2  14   7       65.55       22.25       22.55 o   0.4731E-02
   3  14   7        0.67        0.01        2.09 o   0.6232E-02
  -2  15   7       23.76       14.70       15.51 o   0.6827E-02
  -1  15   7       17.32       13.30       26.49 o   0.7385E-02
   0  15   7       29.55       14.61       16.22 o   0.6738E-02
   1  15   7        0.15        6.09        4.13 o   0.7111E-02
   3  15   7       19.51       16.82       36.46 o   0.7374E-02
  -1  16   7       41.07       33.50       21.67 o   0.3050E-02
   0  16   7       55.54        4.66       18.53 o   0.4594E-02
   1  16   7       43.06       37.25       14.36 o   0.2892E-02
   2  16   7        3.19        0.47       15.45 o   0.7484E-02
  -2  17   7        0.99        5.52        5.17 o   0.7259E-02
  -1  17   7      -26.13       12.18       20.84 o   0.6772E-02
   0  17   7     1098.37     1209.96       88.99 o   0.2632E-04
   1  17   7        4.05        3.55       18.21 o   0.7244E-02
   2  17   7        0.00        0.00        4.33 o   0.7486E-02
   3  17   7       11.82       10.03       21.54 o   0.7437E-02
  -2  18   7      -10.57       12.31       34.27 o   0.6680E-02
  -1  18   7       -4.23        1.12       18.61 o   0.7374E-02
   1  18   7       11.44       11.04       19.51 o   0.7502E-02
   2  18   7       24.29       21.36       21.08 o   0.7302E-02
  -2  19   7        6.75        5.70       18.35 o   0.7247E-02
   1  19   7       -3.84        0.35       16.95 o   0.7542E-02
  -2  20   7      -24.08        1.43       32.70 o   0.6437E-02
   0  20   7       15.57        4.77       24.33 o   0.6892E-02
   1  20   7       47.83       52.82       15.13 o   0.2237E-02
  -2  21   7      -34.69        3.87       18.75 o   0.5548E-02
   0  21   7      170.66      172.56       23.39 o   0.7446E-03
  -2  22   7      -15.14       12.31       36.77 o   0.7258E-02
   0  22   7       -2.63        2.36       15.00 o   0.7441E-02
   1  22   7       19.99       15.43       40.46 o   0.7305E-02
   2  22   7       47.32       24.41       21.89 o   0.6122E-02
  -2  23   7      -27.71        2.19       18.85 o   0.5658E-02
   0  23   7      -14.21        6.09       33.37 o   0.7164E-02
  -2  24   7       13.43       48.31       37.91 o   0.1683E-02
   0  24   7        2.49        3.12       14.60 o   0.7318E-02
   1  24   7       -3.92        0.08       17.91 o   0.7564E-02
   2  24   7       24.76       50.33       22.76 o   0.1887E-02
   0  25   7        6.03        1.10       24.17 o   0.7514E-02
   1  25   7       13.53        3.85       16.83 o   0.6614E-02
   2  25   7       24.92       35.38       21.35 o   0.2496E-02
   0  26   7       -6.24        0.03       22.86 o   0.7570E-02
   1  26   7      -17.23        3.57       37.56 o   0.7373E-02
   0  27   7      -10.81       10.83       29.10 o   0.6922E-02
   1  27   7        0.00        0.00        4.72 o   0.7565E-02
   2  27   7        9.34        2.99       29.79 o   0.7382E-02
   0  28   7      -14.88        0.13       36.83 o   0.7559E-02
   1  28   7       12.71        3.96       37.94 o   0.7356E-02
   0  29   7       -0.93        0.03        4.77 o   0.7576E-02
   1  29   7        1.99        0.39       15.42 o   0.7528E-02
  -1  30   7        2.88        0.08        8.78 o   0.5904E-02
   0  30   7       -8.63        0.68       28.92 o   0.7540E-02
   1  30   7       -0.25        3.20        5.37 o   0.7351E-02
   0  31   7      -19.60        2.83       20.70 o   0.6502E-02
  -1   0   8       -2.08        0.31       13.91 o   0.7413E-02
  -1   1   8       22.55       12.91       15.11 o   0.6849E-02
   0   1   8       63.66       35.66       22.22 o   0.2635E-02
  -1   2   8       10.14        6.53       23.43 o   0.7164E-02
   0   2   8       54.89       34.41       14.74 o   0.2791E-02
   1   2   8       49.77       21.24       18.94 o   0.6033E-02
  -1   3   8       -2.32        1.20       10.59 o   0.7205E-02
   0   3   8        8.63        5.58       18.11 o   0.7334E-02
  -1   4   8        4.41       10.48       14.21 o   0.7027E-02
   0   4   8       30.51       11.24       13.73 o   0.6395E-02
   1   4   8       18.59        4.93       15.01 o   0.6484E-02
  -1   5   8       32.78       33.62       22.77 o   0.3832E-02
   0   5   8       24.54        0.37       20.20 o   0.6053E-02
  -1   6   8       11.88       24.28       23.31 o   0.4141E-02
   0   6   8        5.60        6.26       14.13 o   0.7134E-02
  -1   7   8       12.56        1.69       17.62 o   0.6382E-02
   0   7   8       24.54        0.03       17.74 o   0.6033E-02
  -1   8   8        2.48        1.35       10.96 o   0.7386E-02
   1   8   8       47.42       10.56       19.18 o   0.5696E-02
  -1   9   8        1.57        1.13        7.86 o   0.7436E-02
   0   9   8       24.11        2.13       17.58 o   0.6167E-02
   1   9   8       28.17        2.01       17.95 o   0.6095E-02
  -1  10   8      -19.15       12.74       17.85 o   0.7130E-02
  -1  11   8        8.48        7.09       26.65 o   0.7102E-02
   1  11   8       43.63       11.62       19.71 o   0.5747E-02
  -1  12   8       51.32       69.92       21.37 o   0.1366E-02
  -1  13   8      175.25      232.95       31.60 o   0.5705E-03
