# Supplementary material for: Competition between hydrogen bonding and dispersion interactions in the crystal structures of the primary amines
Source: Royal Society of Chemistry journal article supplement (doi:10.1039/c3ce42639d), 2014-01-01
Supplement: c3ce42639d6.fcf [file c3ce42639d6.fcf]

data_hexylamine
#  Hexylamine in Pca2(1) at 150K                
_audit_creation_date        "11-02-03"
_audit_creation_method      CRYSTALS 

_cell_length_a                    6.9725(3)
_cell_angle_alpha                 90
_cell_length_b                    17.7977(6)
_cell_angle_beta                  90
_cell_length_c                    5.6105(2)
_cell_angle_gamma                 90

# NOTE FO on scale of Fc,      3.51735
# Status flags: 
#    o - used in refinement 
#    < - excluded by I/sigmaI cutoff 
#    x - excluded for another reason  

loop_
_refln_index_h
_refln_index_k
_refln_index_l
_refln_F_squared_meas
_refln_F_squared_calc
_refln_F_squared_sigma
_refln_observed_status
   2   0   0    12061.66    12636.51      174.26 o
   4   0   0     1285.10     1125.08       16.97 o
   6   0   0        9.46        5.04        4.03 <
   8   0   0       97.74      106.63        5.69 o
   0   1   0      218.36      255.26        6.31 o
   1   1   0        7.09        7.14        0.35 o
   2   1   0       60.03       54.18        0.86 o
   3   1   0        9.03        8.68        1.55 o
   4   1   0        0.01        0.06        0.05 <
   5   1   0        1.89        2.71        0.41 o
   6   1   0        1.92        1.96        0.50 o
   7   1   0       -0.59        0.07        0.13 <
   8   1   0        3.18        2.62        1.14 <
   0   2   0      196.44      198.35        1.94 o
   1   2   0       20.37       20.09        0.31 o
   2   2   0       44.79       45.75        0.73 o
   3   2   0       32.17       30.28        0.73 o
   4   2   0       30.02       25.30        0.84 o
   5   2   0        7.61        6.91        2.07 o
   6   2   0        3.31        2.78        0.89 o
   7   2   0        0.93        1.07        0.18 <
   8   2   0        2.35        2.39        0.90 <
   0   3   0      220.31      227.03        3.31 o
   1   3   0       28.94       27.54        0.41 o
   2   3   0       40.29       37.73        0.69 o
   3   3   0       36.79       37.31        0.74 o
   4   3   0       -0.18        0.45        0.05 <
   5   3   0        9.12        9.12        2.65 o
   6   3   0        5.17        5.09        1.52 o
   7   3   0       -2.13        0.37        0.48 <
   8   3   0        1.61        2.75        0.56 <
   0   4   0      216.15      219.03        2.71 o
   1   4   0       -0.05        0.00        0.04 <
   2   4   0       58.07       63.58        0.75 o
   3   4   0        3.53        3.94        0.43 o
   4   4   0       18.52       17.83        0.65 o
   5   4   0        0.90        0.23        0.10 o
   6   4   0        2.97        3.09        0.79 o
   7   4   0        0.25        0.31        0.18 <
   8   4   0       -0.58        0.08        0.26 <
   0   5   0      197.51      195.57        2.56 o
   1   5   0       60.88       59.31        0.77 o
   2   5   0       36.31       29.96        0.58 o
   3   5   0       68.56       69.67        1.02 o
   4   5   0        0.74        1.32        0.05 o
   5   5   0       15.62       17.38        1.05 o
   6   5   0       11.10       11.31        3.74 o
   7   5   0        2.97        1.43        1.01 <
   8   5   0        4.95        5.95        2.00 <
   9   5   0        0.99        0.03        0.34 <
   0   6   0      342.04      337.49        4.26 o
   1   6   0       22.18       21.17        0.47 o
   2   6   0      144.31      148.52        1.49 o
   3   6   0       12.50       12.71        0.70 o
   4   6   0       44.38       47.16        0.90 o
   5   6   0       18.40       20.53        1.16 o
   6   6   0       18.19       16.18        1.21 o
   7   6   0       15.63       14.84        1.50 o
   8   6   0        4.45        2.04        3.38 <
   9   6   0        2.97        2.68        2.49 <
   0   7   0      928.66      885.59       11.10 o
   1   7   0      580.50      554.93        5.26 o
   2   7   0      399.06      382.89        3.77 o
   3   7   0      742.03      744.96        6.52 o
   4   7   0       64.21       60.42        1.44 o
   5   7   0      415.47      432.34        6.29 o
   6   7   0        1.90        2.04        0.59 o
   7   7   0      165.22      172.06        5.38 o
   8   7   0        1.11        1.70        0.76 <
   0   8   0      357.11      324.11        4.56 o
   1   8   0      581.77      544.11        5.31 o
   2   8   0      194.91      174.38        2.04 o
   3   8   0      847.32      829.57        7.42 o
   4   8   0       32.20       31.39        0.92 o
   5   8   0      521.34      513.29        7.68 o
   6   8   0        0.99        1.31        0.16 o
   7   8   0      199.68      203.67        6.26 o
   8   8   0        3.34        0.44        2.54 <
   0   9   0      164.61      152.71        2.38 o
   1   9   0       42.17       36.75        0.72 o
   2   9   0       48.46       50.13        0.85 o
   3   9   0       55.68       55.64        0.91 o
   4   9   0        0.29        0.41        0.07 o
   5   9   0       67.72       67.48        1.78 o
   6   9   0       11.94        9.76        4.65 <
   7   9   0       51.90       46.20        3.06 o
   8   9   0       12.37       11.99       11.38 <
   0  10   0       54.74       53.78        1.15 o
   1  10   0        7.42        7.66        0.97 o
   2  10   0        9.10       10.85        1.25 o
   3  10   0       17.57       17.83        0.69 o
   4  10   0        1.35        0.65        0.21 o
   5  10   0        2.29        2.38        0.92 <
   6  10   0        9.34        9.15        3.19 <
   7  10   0        1.11        0.83        0.50 <
   8  10   0       11.13        8.00       10.24 <
   0  11   0       27.65       23.19        0.88 o
   1  11   0        0.61        0.71        0.05 o
   2  11   0       14.36       13.35        0.61 o
   3  11   0        0.68        1.40        0.07 o
   4  11   0        0.39        0.72        0.09 o
   5  11   0        3.34        2.35        1.36 <
   6  11   0       -0.99        0.09        0.19 <
   7  11   0        3.22        1.66        2.06 <
   8  11   0        0.74        0.12        0.34 <
   0  12   0       54.04       49.82        1.28 o
   1  12   0        0.12        0.48        0.05 o
   2  12   0       17.75       17.45        0.70 o
   3  12   0        0.74        1.15        0.07 o
   4  12   0        0.60        0.47        0.09 o
   5  12   0       -0.62        0.08        0.18 <
   6  12   0        1.92        0.90        0.97 <
   7  12   0        1.98        0.23        1.35 <
   0  13   0       26.10       23.93        0.99 o
   1  13   0       -0.36        0.08        0.05 <
   2  13   0       13.87       13.13        0.87 o
   3  13   0       -0.56        0.18        0.10 <
   4  13   0        3.31        2.33        0.89 o
   5  13   0        0.37        0.23        0.13 <
   6  13   0       -0.87        0.92        0.22 <
   7  13   0        3.22        2.97        2.32 <
   0  14   0       34.81       30.93        1.57 o
   1  14   0        0.97        0.17        0.10 o
   2  14   0       12.84       12.82        1.53 o
   3  14   0        0.94        0.20        0.10 o
   4  14   0        2.81        1.26        0.80 o
   5  14   0        1.92        0.10        0.78 <
   6  14   0        0.62        0.01        0.18 <
   7  14   0       -0.87        0.04        0.30 <
   0  15   0      770.47      861.09       14.05 o
   1  15   0       24.20       23.29        1.15 o
   2  15   0      323.79      368.14        5.12 o
   3  15   0      117.41      107.39        2.48 o
   4  15   0       53.35       59.80        1.91 o
   5  15   0      120.81      114.06        4.55 o
   6  15   0        4.33        1.60        3.12 <
   0  16   0       26.39       21.59        1.55 o
   1  16   0        2.52        1.05        0.62 o
   2  16   0        7.65        8.02        2.13 o
   3  16   0        2.97        3.45        0.77 o
   4  16   0        0.71        0.10        0.18 <
   5  16   0        4.64        2.26        2.23 <
   6  16   0        2.10        1.28        1.43 <
   0  17   0       54.44       55.98        2.63 o
   1  17   0       10.44        9.09        2.76 o
   2  17   0       32.76       36.00        1.35 o
   3  17   0       38.20       37.86        1.72 o
   4  17   0       16.24       18.89        1.32 o
   5  17   0       38.35       33.04        2.71 o
   0  18   0        9.03        7.99        4.08 <
   1  18   0        0.71        0.93        0.18 <
   2  18   0        4.03        3.52        1.12 o
   3  18   0        4.39        3.97        1.40 o
   4  18   0        0.19        0.03        0.17 <
   5  18   0        8.04        2.64        7.08 <
   0  19   0       17.07       17.46        1.84 o
   1  19   0        0.65        0.98        0.12 o
   2  19   0        9.28       10.96        4.16 <
   3  19   0        8.17        4.85        3.45 <
   4  19   0        4.70        3.08        1.69 <
   0  20   0       11.44        5.46        4.21 <
   1  20   0        2.23        1.00        0.67 o
   2  20   0        4.37        2.49        1.87 <
   3  20   0        5.48        3.80        2.28 <
   4  20   0        0.25        0.02        0.18 <
   0  21   0       13.86       11.74        2.85 o
   1  21   0        0.74        0.03        0.29 <
   2  21   0       11.13        7.59       10.69 <
   3  21   0        1.11        0.16        0.85 <
   0  22   0       43.42       42.57        4.21 o
   1  22   0        6.43        4.88        5.66 <
   2  22   0       33.28       29.13        4.33 o
   0  23   0       71.14       60.11        5.32 o
   1  23   0        7.92        7.02        7.28 <
   2   0   1       12.32       11.40        1.74 o
   4   0   1        3.46        4.14        0.66 o
   6   0   1       17.32       18.24        1.19 o
   8   0   1       22.35       24.12        1.81 o
   1   1   1     2654.42     2726.78       17.15 o
   2   1   1      279.98      282.62        1.87 o
   3   1   1      261.81      235.83        2.19 o
   4   1   1      131.49      135.45        1.70 o
   5   1   1       25.50       18.68        0.73 o
   6   1   1       36.36       37.99        1.07 o
   7   1   1       12.04       15.93        2.79 o
   8   1   1        5.77        3.73        1.66 o
   9   1   1       27.28       27.78        2.67 o
   1   2   1     4843.08     5038.44       33.01 o
   2   2   1      214.76      218.94        1.49 o
   3   2   1      560.22      514.06        4.06 o
   4   2   1      124.42      126.18        1.50 o
   5   2   1       63.63       52.28        1.04 o
   6   2   1       36.11       36.86        1.14 o
   7   2   1        3.64        6.84        0.87 o
   8   2   1        4.02        4.44        1.12 o
   9   2   1       15.22       18.55        3.22 o
   1   3   1      607.49      618.23        3.82 o
   2   3   1      229.24      222.68        1.66 o
   3   3   1       88.66       81.68        0.84 o
   4   3   1      105.88      100.79        1.23 o
   5   3   1       16.64       14.23        0.64 o
   6   3   1       31.94       31.90        1.12 o
   7   3   1       -0.83        0.18        0.10 <
   8   3   1        0.37        2.63        0.17 <
   9   3   1        1.61        3.14        1.29 <
   1   4   1      353.50      365.60        2.35 o
   2   4   1       11.86       12.79        0.84 o
   3   4   1       35.00       37.92        0.50 o
   4   4   1        6.13        5.99        0.73 o
   5   4   1        2.68        2.30        0.41 o
   6   4   1        3.75        3.75        0.79 o
   7   4   1        1.27        1.23        0.31 o
   8   4   1        3.09        1.64        1.08 <
   9   4   1        0.00        0.51        0.04 <
   1   5   1      176.01      174.17        1.25 o
   2   5   1      358.36      347.85        2.40 o
   3   5   1        8.85        7.90        0.79 o
   4   5   1      184.18      185.32        1.84 o
   5   5   1        4.34        4.92        0.79 o
   6   5   1      105.44      109.83        2.01 o
   7   5   1        8.41        9.57        2.51 o
   8   5   1       29.73       29.05        2.10 o
   1   6   1      142.51      134.29        0.99 o
   2   6   1      569.43      554.74        3.62 o
   3   6   1        7.82        8.18        0.72 o
   4   6   1      306.00      315.68        2.45 o
   5   6   1        2.08        1.74        0.35 o
   6   6   1      179.14      189.54        3.12 o
   7   6   1        4.29        4.92        1.16 o
   8   6   1       40.95       46.92        2.36 o
   1   7   1       36.87       39.24        0.43 o
   2   7   1      305.99      290.07        2.12 o
   3   7   1        1.91        2.76        0.16 o
   4   7   1      182.70      187.65        1.60 o
   5   7   1       14.65       15.32        0.84 o
   6   7   1      120.31      123.28        2.25 o
   7   7   1       13.38       13.57        1.31 o
   8   7   1       30.19       30.31        2.19 o
   1   8   1       44.00       48.74        0.50 o
   2   8   1      115.71      109.62        0.98 o
   3   8   1       26.63       26.26        0.51 o
   4   8   1       75.48       74.16        0.97 o
   5   8   1       21.28       20.27        0.87 o
   6   8   1       59.84       57.75        1.54 o
   7   8   1        8.50        9.82        2.48 o
   8   8   1       15.16       15.25        2.14 o
   1   9   1      587.33      600.81        3.92 o
   2   9   1      154.58      153.27        1.23 o
   3   9   1      124.20      124.18        1.23 o
   4   9   1       99.39      102.63        1.25 o
   5   9   1        4.99        4.58        0.99 o
   6   9   1       80.22       80.82        1.83 o
   7   9   1        6.11        5.85        2.00 o
   8   9   1       22.39       21.98        2.50 o
   1  10   1      384.68      380.40        2.63 o
   2  10   1      125.19      121.74        1.11 o
   3  10   1       73.44       74.32        0.94 o
   4  10   1       91.63       93.85        1.27 o
   5  10   1        1.35        1.74        0.25 o
   6  10   1       66.21       67.59        1.68 o
   7  10   1        5.85        7.37        2.17 <
   8  10   1       21.71       19.32        2.54 o
   1  11   1       41.10       40.61        0.63 o
   2  11   1        5.06        5.74        0.60 o
   3  11   1        8.80        8.55        1.44 o
   4  11   1        4.88        5.36        0.75 o
   5  11   1        1.34        1.35        0.23 o
   6  11   1        5.79        6.41        1.62 o
   7  11   1        1.42        1.74        0.62 <
   8  11   1        2.72        2.70        2.07 <
   1  12   1       51.05       50.96        0.79 o
   2  12   1       28.81       27.18        0.67 o
   3  12   1       12.53       14.43        1.02 o
   4  12   1       22.26       21.01        0.71 o
   5  12   1        0.88        2.22        0.10 o
   6  12   1        6.93        6.03        2.62 <
   7  12   1        3.53        0.59        1.82 <
   1  13   1      227.85      247.85        2.09 o
   2  13   1        3.59        3.29        0.49 o
   3  13   1       51.06       57.27        0.96 o
   4  13   1        6.23        6.15        1.02 o
   5  13   1        3.09        5.36        0.67 o
   6  13   1        7.05        6.74        2.59 <
   7  13   1        2.41        3.56        1.23 <
   1  14   1      253.74      269.52        2.40 o
   2  14   1       18.91       20.28        0.64 o
   3  14   1       59.92       72.28        1.06 o
   4  14   1       21.60       23.02        0.91 o
   5  14   1        3.44        5.22        0.90 o
   6  14   1       12.29       10.46        3.51 o
   7  14   1        9.16        6.24        8.79 <
   1  15   1       99.98      106.07        1.33 o
   2  15   1        5.95        5.38        0.98 o
   3  15   1       36.66       42.39        0.92 o
   4  15   1        4.44        4.42        1.00 o
   5  15   1        9.67        8.93        2.83 o
   6  15   1        1.92        0.13        0.90 <
   1  16   1       50.94       61.36        1.08 o
   2  16   1       30.15       30.69        0.94 o
   3  16   1       13.60       16.27        0.95 o
   4  16   1       48.62       49.84        1.36 o
   5  16   1       -0.15        0.92        0.12 <
   6  16   1       30.06       32.16        2.80 o
   1  17   1      114.86      126.93        1.88 o
   2  17   1       44.91       39.91        1.26 o
   3  17   1       30.60       35.57        1.15 o
   4  17   1       71.17       66.45        1.66 o
   5  17   1        4.52        2.92        1.68 <
   1  18   1        7.89        8.86        1.97 o
   2  18   1       19.79       16.87        1.00 o
   3  18   1        2.47        3.10        0.55 o
   4  18   1       30.89       27.60        1.45 o
   5  18   1        1.55        1.37        0.55 <
   1  19   1        3.03        2.03        0.66 o
   2  19   1        0.62        0.22        0.09 o
   3  19   1        0.22        0.02        0.11 <
   4  19   1        0.12        0.57        0.16 <
   1  20   1        2.09        0.69        0.49 o
   2  20   1        6.65        6.00        1.74 o
   3  20   1        1.14        1.32        0.38 o
   4  20   1       10.70        9.46        4.92 <
   1  21   1       19.67       17.56        1.88 o
   2  21   1       12.41        9.89        2.65 o
   3  21   1        7.67        9.77        5.03 <
   1  22   1       34.58       35.54        2.80 o
   2  22   1       15.30       12.04        1.84 o
   3  22   1       10.39        9.87       10.39 <
   1  23   1       16.52       13.43        2.36 o
   2  23   1        8.54        4.12        8.54 <
   0   0   2      612.40      636.01        9.27 o
   2   0   2      183.11      188.66        1.88 o
   4   0   2       20.45       18.17        0.92 o
   6   0   2        0.45        1.23        0.09 o
   8   0   2        1.36        0.10        0.93 <
   0   1   2      251.99      266.58        3.38 o
   1   1   2        0.06        0.17        0.04 o
   2   1   2       75.79       75.72        0.76 o
   3   1   2        0.51        0.67        0.04 o
   4   1   2        4.01        3.31        0.54 o
   5   1   2        0.52        0.71        0.07 o
   6   1   2        1.94        2.71        0.43 o
   7   1   2        1.34        2.59        0.34 o
   8   1   2        5.48        5.26        2.31 <
   0   2   2     1665.74     1670.90       13.94 o
   1   2   2       41.88       42.07        0.42 o
   2   2   2      403.56      387.73        2.82 o
   3   2   2       68.92       71.40        0.78 o
   4   2   2       35.02       29.51        0.86 o
   5   2   2       49.30       52.98        1.03 o
   6   2   2        0.43        1.69        0.10 o
   7   2   2       33.30       31.21        1.53 o
   8   2   2       14.80       15.64        1.69 o
   0   3   2     1595.77     1517.02       12.83 o
   1   3   2      126.26      122.05        0.95 o
   2   3   2      360.52      322.07        2.63 o
   3   3   2      227.44      224.99        1.77 o
   4   3   2       33.07       26.57        0.91 o
   5   3   2      160.98      161.28        2.00 o
   6   3   2       10.12        9.51        3.29 o
   7   3   2       78.39       75.39        2.28 o
   8   3   2       29.61       30.97        2.19 o
   0   4   2      128.32      128.27        1.30 o
   1   4   2       85.69       86.38        0.72 o
   2   4   2       59.24       62.65        0.64 o
   3   4   2      115.83      122.98        1.10 o
   4   4   2       17.32       14.23        0.63 o
   5   4   2       73.46       76.32        1.39 o
   6   4   2        6.83        7.55        1.78 o
   7   4   2       29.87       32.65        1.54 o
   8   4   2        3.09        0.80        1.33 <
   0   5   2      525.73      493.13        4.59 o
   1   5   2      316.59      299.60        2.19 o
   2   5   2      216.97      211.92        1.67 o
   3   5   2      453.57      455.70        3.55 o
   4   5   2       51.86       52.22        0.91 o
   5   5   2      284.32      290.05        3.21 o
   6   5   2        6.56        6.57        1.73 o
   7   5   2      104.99      109.73        2.69 o
   8   5   2        2.35        1.72        1.23 <
   0   6   2      274.17      253.28        2.54 o
   1   6   2      107.63      105.58        0.89 o
   2   6   2      109.68      105.76        1.01 o
   3   6   2      191.52      198.32        1.74 o
   4   6   2       24.35       26.82        0.71 o
   5   6   2      117.72      121.63        1.74 o
   6   6   2        3.48        3.72        0.86 o
   7   6   2       45.33       45.83        1.79 o
   8   6   2        0.43        0.07        0.23 <
   0   7   2       85.08       87.01        1.08 o
   1   7   2        9.06        9.09        0.81 o
   2   7   2       31.99       32.52        0.59 o
   3   7   2       16.53       16.76        0.52 o
   4   7   2        6.31        5.73        1.00 o
   5   7   2        4.98        4.89        0.88 o
   6   7   2        1.73        2.25        0.46 o
   7   7   2        1.90        1.00        0.50 o
   8   7   2        2.60        1.11        1.13 <
   0   8   2       40.27       36.24        0.68 o
   1   8   2       16.79       16.39        0.38 o
   2   8   2        9.93       10.04        1.30 o
   3   8   2       35.23       35.56        0.73 o
   4   8   2        0.58        0.30        0.07 o
   5   8   2       15.18       15.60        0.78 o
   6   8   2        0.58        0.83        0.13 <
   7   8   2        3.48        3.83        0.93 o
   8   8   2        1.77        1.07        0.78 <
   0   9   2      155.56      161.83        2.08 o
   1   9   2       14.45       15.06        0.53 o
   2   9   2       74.49       73.01        0.99 o
   3   9   2       26.71       26.08        0.65 o
   4   9   2       19.87       19.63        0.68 o
   5   9   2       15.53       14.70        0.72 o
   6   9   2        2.99        2.19        0.69 o
   7   9   2        4.10        4.38        1.15 o
   8   9   2        1.24        1.24        0.76 <
   0  10   2      142.38      150.41        2.16 o
   1  10   2       43.42       46.74        0.68 o
   2  10   2       82.66       83.52        1.03 o
   3  10   2       82.53       82.98        1.10 o
   4  10   2       28.34       26.80        0.79 o
   5  10   2       54.71       55.21        1.19 o
   6  10   2        3.62        2.13        0.84 o
   7  10   2       16.68       16.60        1.36 o
   0  11   2       93.96       93.36        1.57 o
   1  11   2        9.44       10.77        1.24 o
   2  11   2       49.43       49.43        0.81 o
   3  11   2       17.00       18.34        0.59 o
   4  11   2        9.39        9.37        1.57 o
   5  11   2       17.14       18.18        0.80 o
   6  11   2        1.82        2.71        0.46 o
   7  11   2        9.63       13.54        3.82 <
   0  12   2      820.68      875.32        8.94 o
   1  12   2        3.53        3.23        0.46 o
   2  12   2      357.39      394.87        3.18 o
   3  12   2        7.55        7.38        1.16 o
   4  12   2       58.98       67.67        1.12 o
   5  12   2        7.32        7.63        1.62 o
   6  12   2        3.39        2.49        0.88 o
   7  12   2        5.78        6.24        2.27 <
   0  13   2      521.04      537.84        5.98 o
   1  13   2        0.03        0.03        0.07 <
   2  13   2      229.04      256.66        2.34 o
   3  13   2        0.09        0.15        0.05 o
   4  13   2       36.37       46.31        1.01 o
   5  13   2        0.28        0.45        0.08 o
   6  13   2        1.13        0.33        0.34 o
   7  13   2        3.59        0.72        3.01 <
   0  14   2       64.53       72.15        1.39 o
   1  14   2        0.74        0.78        0.07 o
   2  14   2       29.75       33.39        0.77 o
   3  14   2        1.67        2.07        0.24 o
   4  14   2        4.73        5.94        0.92 o
   5  14   2        0.69        0.90        0.09 o
   6  14   2        0.49        0.08        0.14 <
   0  15   2       19.97       21.81        0.97 o
   1  15   2        0.78        0.19        0.07 o
   2  15   2        9.52        9.63        1.65 o
   3  15   2        1.29        0.87        0.23 o
   4  15   2        0.10        0.93        0.08 <
   5  15   2        2.83        0.81        0.68 o
   6  15   2       -0.80        0.01        0.17 <
   0  16   2       15.18       17.47        1.07 o
   1  16   2        0.16        0.29        0.06 o
   2  16   2        6.46        7.51        1.17 o
   3  16   2        0.18        1.09        0.07 <
   4  16   2        0.77        0.36        0.10 o
   5  16   2        0.08        0.75        0.14 <
   6  16   2        3.46        0.53        3.05 <
   0  17   2       10.31       11.75        2.66 o
   1  17   2        3.65        3.20        0.60 o
   2  17   2        2.82        3.45        0.51 o
   3  17   2       15.32       14.97        0.81 o
   4  17   2        0.04        0.27        0.11 <
   5  17   2       18.22       18.54        1.53 o
   0  18   2        6.97        8.46        1.92 o
   1  18   2        7.37        9.20        1.79 o
   2  18   2        1.51        1.86        0.37 o
   3  18   2       44.29       44.56        1.32 o
   4  18   2        1.95        0.39        0.73 <
   5  18   2       46.46       49.48        3.12 o
   0  19   2       16.05       17.85        1.77 o
   1  19   2        5.04        5.16        1.23 o
   2  19   2       10.79       12.13        2.68 o
   3  19   2       24.45       23.76        1.38 o
   4  19   2        5.61        7.11        2.48 <
   0  20   2        8.60        8.65        5.23 <
   1  20   2       16.49       17.29        1.54 o
   2  20   2        5.41        5.19        2.10 <
   3  20   2       84.56       79.06        2.82 o
   4  20   2        1.86        0.73        0.99 <
   0  21   2        2.97        2.17        2.14 <
   1  21   2        6.06        5.81        2.94 <
   2  21   2       -0.37        1.19        0.25 <
   3  21   2       32.48       27.07        2.81 o
   0  22   2        2.72        2.68        2.07 <
   1  22   2       -0.49        0.01        0.24 <
   2  22   2        1.24        1.27        0.99 <
   2   0   3       24.10       26.15        0.63 o
   4   0   3       12.37       12.50        3.15 o
   6   0   3        6.36        5.95        2.10 o
   8   0   3        0.49        0.99        0.24 <
   1   1   3        2.69        2.69        0.22 o
   2   1   3       18.42       18.00        0.43 o
   3   1   3        1.42        1.37        0.15 o
   4   1   3       15.15       13.44        0.85 o
   5   1   3        0.85        0.63        0.09 o
   6   1   3        2.23        2.76        0.47 o
   7   1   3       -0.90        0.89        0.15 <
   8   1   3        3.65        1.62        2.00 <
   1   2   3       58.03       55.51        0.61 o
   2   2   3       40.98       40.79        0.60 o
   3   2   3        9.66        8.71        1.33 o
   4   2   3       25.14       25.78        0.84 o
   5   2   3        0.42        1.66        0.09 o
   6   2   3       27.81       29.63        1.07 o
   7   2   3        8.91        8.63        3.66 <
   8   2   3       16.33       14.94        2.32 o
   1   3   3      343.65      356.53        2.32 o
   2   3   3      107.82      109.15        1.03 o
   3   3   3       84.60       92.43        1.12 o
   4   3   3       77.31       80.88        1.33 o
   5   3   3        7.88        7.65        1.73 o
   6   3   3       50.93       50.64        1.32 o
   7   3   3        1.78        1.84        0.49 o
   8   3   3       12.74       11.20        3.23 o
   1   4   3     1051.61      967.13        6.34 o
   2   4   3      350.69      368.34        2.65 o
   3   4   3      184.50      172.77        1.80 o
   4   4   3      325.02      337.72        3.36 o
   5   4   3       14.94       14.24        0.97 o
   6   4   3      231.50      228.51        3.26 o
   7   4   3       12.59       10.78        1.62 o
   8   4   3       61.86       60.49        5.20 o
   1   5   3      110.12       90.01        0.92 o
   2   5   3       43.70       42.05        0.66 o
   3   5   3       14.96       11.74        0.65 o
   4   5   3       55.14       55.45        1.02 o
   5   5   3        7.51        8.17        1.71 o
   6   5   3       35.18       35.36        1.25 o
   7   5   3        3.66        4.98        1.27 <
   8   5   3        8.91        9.82        7.84 <
   1   6   3        1.05        2.99        0.09 o
   2   6   3       11.71       11.24        1.46 o
   3   6   3        2.27        1.06        0.28 o
   4   6   3       16.88       16.66        0.71 o
   5   6   3       10.76       11.13        2.00 o
   6   6   3       10.96       12.56        2.91 o
   7   6   3        5.51        6.16        2.09 <
   8   6   3        4.82        2.56        4.25 <
   1   7   3        1.29        1.62        0.14 o
   2   7   3        1.86        1.48        0.21 o
   3   7   3        1.08        0.87        0.15 o
   4   7   3        0.80        1.21        0.08 o
   5   7   3        4.02        4.04        0.67 o
   6   7   3        1.45        0.96        0.36 o
   7   7   3        3.15        2.73        1.16 <
   1   8   3       11.17       12.71        1.45 o
   2   8   3        2.62        2.78        0.31 o
   3   8   3        1.27        1.05        0.19 o
   4   8   3        4.09        3.90        0.64 o
   5   8   3        2.08        1.97        0.34 o
   6   8   3        1.78        1.79        0.46 o
   7   8   3        4.50        1.77        1.95 <
   1   9   3        2.89        3.56        0.33 o
   2   9   3        2.31        2.36        0.29 o
   3   9   3        0.61        0.56        0.06 o
   4   9   3        2.84        2.58        0.43 o
   5   9   3        2.09        2.94        0.35 o
   6   9   3        1.47        1.19        0.36 o
   7   9   3        2.35        1.33        1.05 <
   1  10   3      102.85      112.91        1.26 o
   2  10   3       11.23       11.58        1.58 o
   3  10   3       23.61       26.63        0.68 o
   4  10   3       16.45       16.15        0.75 o
   5  10   3        2.99        3.45        0.55 o
   6  10   3       10.04        9.52        2.75 o
   7  10   3        3.88        1.69        1.79 <
   1  11   3      629.89      688.63        5.17 o
   2  11   3       56.97       51.54        0.95 o
   3  11   3      179.65      198.03        1.96 o
   4  11   3       58.13       56.27        1.11 o
   5  11   3       13.90       16.86        1.08 o
   6  11   3       34.99       34.02        1.51 o
   7  11   3       14.04       10.84        2.23 o
   1  12   3      127.59      130.75        1.50 o
   2  12   3       18.02       18.05        0.66 o
   3  12   3       43.58       41.10        0.90 o
   4  12   3       16.93       17.86        0.81 o
   5  12   3        2.99        3.41        0.59 o
   6  12   3       11.08        9.91        3.20 o
   7  12   3        4.45        2.09        3.56 <
   1  13   3      124.77      134.44        1.57 o
   2  13   3        6.34        6.81        1.04 o
   3  13   3       39.79       43.48        0.89 o
   4  13   3        5.16        5.85        0.97 o
   5  13   3        1.29        2.43        0.27 o
   6  13   3        4.82        4.68        1.71 <
   1  14   3       22.34       22.64        0.72 o
   2  14   3        5.48        5.10        0.91 o
   3  14   3        8.40        7.91        1.60 o
   4  14   3        4.99        6.13        0.99 o
   5  14   3        0.73        0.73        0.11 o
   6  14   3       -1.05        0.84        0.37 <
   1  15   3        9.86       10.29        1.87 o
   2  15   3        3.88        3.60        0.64 o
   3  15   3        2.93        3.82        0.50 o
   4  15   3        4.14        3.77        0.91 o
   5  15   3        0.09        0.33        0.10 <
   6  15   3        3.42        1.43        1.73 <
   1  16   3       10.28        9.90        1.89 o
   2  16   3        3.67        3.15        0.66 o
   3  16   3        3.76        4.41        0.67 o
   4  16   3        4.29        3.81        1.09 o
   5  16   3        1.11        1.00        0.40 <
   1  17   3        5.42        6.01        1.02 o
   2  17   3        4.63        3.96        0.94 o
   3  17   3        2.79        2.94        0.56 o
   4  17   3        5.57        6.49        1.85 o
   5  17   3        1.61        1.61        0.84 <
   1  18   3       12.28       11.91        2.17 o
   2  18   3       17.68       17.04        1.12 o
   3  18   3        3.05        4.01        0.97 o
   4  18   3       34.68       28.63        2.36 o
   1  19   3        3.93        5.06        1.01 o
   2  19   3       68.04       64.73        2.31 o
   3  19   3       -0.25        0.36        0.27 <
   4  19   3      131.88      114.01        7.42 o
   1  20   3        0.58        1.67        0.22 <
   2  20   3        6.12        6.37        3.62 <
   0   0   4      101.52      100.63        2.02 o
   2   0   4       38.95       38.35        1.15 o
   4   0   4        4.58        4.02        1.49 o
   6   0   4        1.81        2.21        0.71 <
   0   1   4      424.57      434.97        4.36 o
   1   1   4        2.65        2.93        0.32 o
   2   1   4      192.74      199.83        1.80 o
   3   1   4        3.54        3.57        0.56 o
   4   1   4       28.76       28.91        0.98 o
   5   1   4        6.78        6.66        1.68 o
   6   1   4        0.22        0.60        0.12 <
   7   1   4        6.74        8.42        3.90 <
   0   2   4      303.02      300.18        2.94 o
   1   2   4       22.63       23.63        0.50 o
   2   2   4      138.67      135.56        1.34 o
   3   2   4       38.66       38.63        0.90 o
   4   2   4       23.23       21.59        0.89 o
   5   2   4       34.87       33.50        1.20 o
   6   2   4        0.14        0.54        0.15 <
   7   2   4       17.26       16.20        2.28 o
   0   3   4       60.45       56.49        1.01 o
   1   3   4       12.93       13.75        0.54 o
   2   3   4       32.66       33.13        0.66 o
   3   3   4       25.84       26.78        0.77 o
   4   3   4       12.95       12.10        1.10 o
   5   3   4       17.52       17.66        1.01 o
   6   3   4        0.65        1.54        0.16 <
   7   3   4        2.66        5.13        1.32 <
   0   4   4       29.76       27.99        0.68 o
   1   4   4        0.06        0.53        0.04 <
   2   4   4       10.99       10.94        1.78 o
   3   4   4        1.99        1.33        0.33 o
   4   4   4        5.92        5.71        1.07 o
   5   4   4        2.40        2.14        0.48 o
   6   4   4        6.51        5.98        1.66 o
   7   4   4        2.72        4.16        1.42 <
   0   5   4       13.75        9.87        0.74 o
   1   5   4       12.02       12.84        1.36 o
   2   5   4        1.65        1.15        0.22 o
   3   5   4       50.62       49.40        1.00 o
   4   5   4        1.40        1.56        0.27 o
   5   5   4       50.82       51.45        1.19 o
   6   5   4        2.98        1.79        0.68 o
   7   5   4       28.00       25.28        2.36 o
   0   6   4       63.82       55.93        1.37 o
   1   6   4       43.39       45.23        0.77 o
   2   6   4       22.49       17.80        0.65 o
   3   6   4      153.21      154.71        1.82 o
   4   6   4        3.87        4.72        0.70 o
   5   6   4      135.99      134.93        2.11 o
   6   6   4        0.24        1.58        0.12 <
   7   6   4       56.04       55.26        2.91 o
   0   7   4       23.52       20.98        0.93 o
   1   7   4       21.61       21.06        0.63 o
   2   7   4        8.64        7.82        1.40 o
   3   7   4       75.18       73.15        1.20 o
   4   7   4        3.08        3.55        0.50 o
   5   7   4       66.66       66.86        1.37 o
   6   7   4        0.85        1.30        0.13 o
   0   8   4       28.76       30.82        1.00 o
   1   8   4        7.04        6.64        1.04 o
   2   8   4       15.19       15.97        0.72 o
   3   8   4       23.69       22.67        0.80 o
   4   8   4        5.67        6.69        1.03 o
   5   8   4       20.77       20.08        0.88 o
   6   8   4        1.73        2.30        0.51 o
   0   9   4       78.07       94.94        1.63 o
   1   9   4       18.92       17.96        0.62 o
   2   9   4       38.48       45.07        0.83 o
   3   9   4       67.30       66.33        1.21 o
   4   9   4       11.46       14.43        2.04 o
   5   9   4       57.30       55.90        1.26 o
   6   9   4        2.80        2.40        0.91 o
   0  10   4       66.67       81.50        1.49 o
   1  10   4        6.21        5.59        0.95 o
   2  10   4       25.45       33.12        0.73 o
   3  10   4       28.07       25.80        0.88 o
   4  10   4        2.97        4.80        0.54 o
   5  10   4       31.72       28.61        1.07 o
   6  10   4        3.09        2.12        1.13 <
   0  11   4       40.88       44.88        1.23 o
   1  11   4        0.66        0.58        0.07 o
   2  11   4       14.40       16.80        0.79 o
   3  11   4        4.35        3.37        0.75 o
   4  11   4        0.05        0.41        0.07 <
   5  11   4        9.13        7.09        2.46 o
   6  11   4        5.03        2.87        2.45 <
   0  12   4       11.49       12.32        2.59 o
   1  12   4        0.66        0.50        0.08 o
   2  12   4        7.16        7.23        1.57 o
   3  12   4        0.08        0.65        0.09 <
   4  12   4        2.26        2.10        0.43 o
   5  12   4       -0.35        0.11        0.13 <
   6  12   4       -1.86        0.28        1.11 <
   0  13   4      166.68      178.56        2.79 o
   1  13   4        0.87        0.31        0.08 o
   2  13   4       93.98      101.58        1.47 o
   3  13   4        0.32        0.07        0.08 o
   4  13   4       18.24       20.06        0.82 o
   5  13   4        0.67        0.14        0.18 <
   0  14   4      193.25      197.18        3.14 o
   1  14   4        0.37        0.68        0.07 o
   2  14   4      110.50      113.09        1.65 o
   3  14   4        5.65        5.99        1.16 o
   4  14   4       21.31       23.38        1.25 o
   5  14   4        4.36        5.45        2.09 <
   0  15   4       39.48       41.54        1.34 o
   1  15   4        0.83        0.40        0.08 o
   2  15   4       21.12       22.78        0.86 o
   3  15   4        2.89        2.43        0.69 o
   4  15   4        3.53        3.97        1.05 o
   5  15   4        3.71        2.45        2.18 <
   0  16   4       22.34       19.56        1.19 o
   1  16   4        0.57        0.82        0.10 o
   2  16   4        8.61        9.26        2.13 o
   3  16   4        6.61        3.97        2.33 <
   4  16   4        0.21        0.34        0.22 <
   0  17   4       16.55       14.67        1.28 o
   1  17   4        6.11        6.00        1.66 o
   2  17   4        6.76        7.53        2.17 o
   3  17   4       25.16       25.99        2.13 o
   0  18   4       17.38       16.05        2.06 o
   1  18   4        5.65        6.01        2.55 <
   2  18   4       12.41       11.76        2.72 o
   3  18   4       34.89       27.64        4.08 o
   0  19   4        8.04        5.78        6.11 <
   1  19   4        3.46        0.44        2.22 <
   2  19   4        5.07        5.00        3.65 <
   2   0   5       15.64       15.93        0.94 o
   4   0   5       15.02       12.32        1.72 o
   6   0   5        6.06        7.39        3.34 <
   1   1   5      442.66      436.08        3.77 o
   2   1   5        9.81       10.26        1.76 o
   3   1   5      145.79      144.55        2.00 o
   4   1   5        9.04        8.61        2.25 o
   5   1   5       11.72       12.73        2.39 o
   6   1   5        1.11        1.63        0.41 <
   1   2   5       45.63       44.38        0.79 o
   2   2   5        5.81        6.31        0.86 o
   3   2   5       17.03       15.91        0.76 o
   4   2   5        7.84        6.52        1.84 o
   5   2   5        1.47        1.98        0.37 o
   6   2   5        1.02        2.20        0.42 <
   1   3   5       24.31       26.23        0.76 o
   2   3   5        0.71        0.86        0.07 o
   3   3   5        7.29        7.52        1.36 o
   4   3   5        1.39        1.50        0.32 o
   5   3   5        0.16        0.32        0.15 <
   6   3   5        1.39        0.78        0.71 <
   1   4   5        8.82        7.69        1.28 o
   2   4   5        5.28        5.51        0.86 o
   3   4   5        1.87        1.87        0.30 o
   4   4   5        7.14        6.80        1.49 o
   5   4   5        0.35        0.08        0.13 <
   6   4   5        3.77        3.13        1.43 <
   1   5   5        7.78        8.39        1.15 o
   2   5   5        1.92        1.78        0.29 o
   3   5   5        3.35        2.92        0.59 o
   4   5   5        3.08        2.98        0.56 o
   5   5   5       -0.44        0.62        0.12 <
   6   5   5        2.72        2.15        1.03 <
   1   6   5        1.00        0.97        0.07 o
   2   6   5       24.29       24.15        0.84 o
   3   6   5        1.77        1.31        0.29 o
   4   6   5       42.84       38.78        1.13 o
   5   6   5        5.39        4.03        1.40 o
   6   6   5       30.99       29.53        2.85 o
   1   7   5        2.68        4.46        0.33 o
   2   7   5       49.62       49.30        0.99 o
   3   7   5        6.77        6.41        1.30 o
   4   7   5       84.89       79.98        1.61 o
   5   7   5        6.72        6.71        2.20 o
   6   7   5       54.31       56.21        3.33 o
   1   8   5       53.07       60.36        0.96 o
   2   8   5       55.85       54.29        1.05 o
   3   8   5       11.22       12.78        2.24 o
   4   8   5       98.07       90.76        1.75 o
   5   8   5        1.06        1.32        0.38 <
   1   9   5       30.51       35.59        0.82 o
   2   9   5       35.44       33.33        0.90 o
   3   9   5        5.42        6.36        1.17 o
   4   9   5       61.36       58.19        1.60 o
   5   9   5        0.49        0.48        0.19 <
   1  10   5        3.29        4.39        0.54 o
   2  10   5        1.07        1.33        0.22 o
   3  10   5        2.55        2.10        0.51 o
   4  10   5        2.99        2.29        0.83 o
   5  10   5        2.81        0.67        0.99 <
   1  11   5        7.74        7.72        1.44 o
   2  11   5        4.68        5.25        0.84 o
   3  11   5        3.17        3.25        0.57 o
   4  11   5        6.14        7.00        2.80 <
   5  11   5        3.09        0.67        1.49 <
   1  12   5        5.87        5.14        1.12 o
   2  12   5        0.03        0.22        0.06 <
   3  12   5        1.24        2.04        0.34 o
   4  12   5       -1.61        0.31        0.48 <
   5  12   5        0.99        0.36        0.30 <
   1  13   5       10.77       10.32        2.23 o
   2  13   5        1.61        3.33        0.45 o
   3  13   5        2.51        3.97        0.88 <
   4  13   5        3.34        4.77        2.27 <
   1  14   5       53.77       50.47        1.98 o
   2  14   5       -0.70        1.05        0.20 <
   3  14   5       18.23       15.65        1.87 o
   1  15   5        2.91        3.71        1.12 <
   2  15   5        1.98        2.40        0.78 <
   3  15   5       -0.99        1.69        0.38 <
   1  16   5      132.71      131.10        4.01 o
   2  16   5       23.51       27.61        3.59 o
   0   0   6      281.46      272.87        5.71 o
   2   0   6      156.95      156.18        3.27 o
   4   0   6       32.51       31.43        1.91 o
   0   1   6      131.04      128.27        2.61 o
   1   1   6        0.36        0.02        0.06 o
   2   1   6       71.18       72.26        1.58 o
   3   1   6        2.41        2.11        0.49 o
   4   1   6       15.14       13.42        1.36 o
   5   1   6        4.58        4.02        2.30 <
   0   2   6       61.73       62.13        1.69 o
   1   2   6       -0.48        0.48        0.09 <
   2   2   6       34.02       34.97        1.20 o
   3   2   6        3.64        3.78        0.76 o
   4   2   6        5.74        7.85        2.04 <
   5   2   6        2.89        2.77        1.20 <
   0   3   6        5.55        6.34        1.36 o
   1   3   6       -0.37        0.33        0.10 <
   2   3   6        4.12        4.30        0.86 o
   3   3   6        1.63        1.27        0.38 o
   4   3   6        1.82        2.51        0.62 <
   5   3   6        2.10        0.59        0.94 <
   0   4   6        2.95        3.11        0.70 o
   1   4   6        0.36        0.57        0.08 o
   2   4   6        0.85        1.02        0.09 o
   3   4   6        1.46        2.07        0.38 o
   4   4   6        0.49        0.63        0.13 <
   5   4   6       -0.12        0.92        0.09 <
   0   5   6        2.91        3.80        0.70 o
   1   5   6        0.15        0.65        0.09 <
   2   5   6        2.44        3.22        0.42 o
   3   5   6        3.53        2.78        1.05 o
   4   5   6        1.32        2.80        0.68 <
   5   5   6       -1.61        3.53        0.96 <
   0   6   6        2.87        2.34        0.76 o
   1   6   6       10.17        9.72        1.75 o
   2   6   6        0.55        0.62        0.11 o
   3   6   6       51.38       43.93        2.40 o
   4   6   6        0.25        0.57        0.30 <
   5   6   6       46.39       43.90        4.45 o
   0   7   6        8.39       10.06        2.13 o
   1   7   6       10.61       10.76        2.06 o
   2   7   6        7.16        7.44        1.85 o
   3   7   6       54.99       51.76        2.26 o
   4   7   6        1.11        2.33        0.60 <
   0   8   6       18.68       20.10        1.06 o
   1   8   6        5.80        7.25        1.17 o
   2   8   6       16.33       16.40        1.19 o
   3   8   6       34.27       33.26        1.86 o
   4   8   6        6.00        6.33        3.96 <
   0   9   6       11.69       13.05        3.35 o
   1   9   6        5.49        6.42        1.73 o
   2   9   6        9.93       11.09        2.51 o
   3   9   6       29.77       28.32        2.12 o
   0  10   6        6.31        9.97        2.55 <
   1  10   6        1.11        0.74        0.46 <
   2  10   6        5.03        5.93        2.02 <
   3  10   6        4.95        3.43        2.71 <
   0  11   6        7.24        6.15        3.74 <
   1  11   6        0.37        0.13        0.18 <
   2  11   6        0.99        2.85        0.40 <
   0  12   6        1.24        2.12        0.94 <
   1  12   6       -0.80        0.01        0.28 <
   2  12   6        0.74        1.32        0.36 <
   0  13   6       17.44       19.76        3.34 o
   1  13   6       -1.61        0.04        0.83 <
   1  14   6        0.99        0.49        0.40 <
   1   1   7        2.78        3.01        0.79 o
   1   2   7       33.34       31.94        1.75 o
   1   3   7       51.34       49.26        2.85 o
   1   4   7       22.76       23.26        2.10 o
   3   4   7        3.46        7.67        3.19 <
   1   5   7       10.14        8.20        5.28 <
   3   5   7        3.84        2.05        2.91 <
   2   7   7        1.48        1.94        1.25 <
