# Supplementary material for: Competition between hydrogen bonding and dispersion interactions in the crystal structures of the primary amines
Source: Royal Society of Chemistry journal article supplement (doi:10.1039/c3ce42639d), 2014-01-01
Supplement: c3ce42639d7.fcf [file c3ce42639d7.fcf]

data_nonylamine 
#  Nonylamine in P2(1)/c at 150K                      
_audit_creation_date        "11-02-09"
_audit_creation_method      CRYSTALS 

_cell_length_a                    5.5458(2)
_cell_angle_alpha                 90
_cell_length_b                    50.6527(17)
_cell_angle_beta                  90.040(2)
_cell_length_c                    7.0521(2)
_cell_angle_gamma                 90

# NOTE FO on scale of Fc,      6.01059
# Status flags: 
#    o - used in refinement 
#    < - excluded by I/sigmaI cutoff 
#    x - excluded for another reason  

loop_
_refln_index_h
_refln_index_k
_refln_index_l
_refln_F_squared_meas
_refln_F_squared_calc
_refln_F_squared_sigma
_refln_observed_status
   1   0   0       -0.22        0.40        0.34 o
   2   0   0        3.23        9.02        3.60 o
   3   0   0        2.15        0.12        1.70 o
   4   0   0      258.19      266.96       17.00 o
   5   0   0       -1.34        0.67        6.63 o
   6   0   0       -7.88        1.01       15.46 o
   1   1   0       -3.73        0.00        0.88 o
   2   1   0      439.64      439.40        9.27 o
   3   1   0        0.50        0.39        0.71 o
   4   1   0       76.36       68.91        7.43 o
   5   1   0       -5.45        0.17        7.84 o
   6   1   0       81.77       69.24       13.30 o
   1   2   0       -1.00        0.01        0.38 o
   2   2   0     2624.50     2819.46       35.85 o
   3   2   0       -3.52        0.04        3.37 o
   4   2   0     1320.69     1344.37       23.78 o
   5   2   0      -14.52        0.02       12.28 o
   6   2   0        4.52        3.35       10.93 o
   1   3   0       -6.63        0.58        1.38 o
   2   3   0      880.15      898.10       14.80 o
   3   3   0        6.70        0.17        5.02 o
   4   3   0     2346.58     2353.02       36.47 o
   5   3   0      -14.96        0.20       16.49 o
   6   3   0      586.53      589.23       25.27 o
   0   4   0     2175.40     1923.91       54.62 o
   1   4   0        0.36        0.01        0.16 o
   2   4   0       24.80       33.61       11.45 o
   3   4   0        3.66        0.04        3.48 o
   4   4   0      185.84      158.23       10.38 o
   5   4   0       -1.53        0.07        3.77 o
   6   4   0      635.69      614.15       26.27 o
   1   5   0       -2.04        1.29        0.58 o
   2   5   0      243.86      238.98        7.71 o
   3   5   0        2.08        0.50        2.82 o
   4   5   0      383.82      383.97       11.89 o
   5   5   0        0.81        0.59        1.13 o
   6   5   0       38.56       30.12       14.30 o
   0   6   0     1579.27     1493.90       28.77 o
   1   6   0       -2.01        1.27        0.83 o
   2   6   0     4449.90     4302.37       61.86 o
   3   6   0        2.62        0.11        2.46 o
   4   6   0      637.81      632.37       15.31 o
   5   6   0        1.82        0.23        2.53 o
   6   6   0      377.90      425.00       22.05 o
   1   7   0       -1.58        0.15        0.51 o
   2   7   0     3414.33     3384.02       49.01 o
   3   7   0       -3.07        0.15        3.00 o
   4   7   0      189.92      168.70        9.82 o
   5   7   0        2.10        1.17        3.92 o
   6   7   0      353.85      369.09       24.93 o
   0   8   0     1217.13     1093.59       23.02 o
   1   8   0       -0.25        0.17        0.26 o
   2   8   0      329.53      334.09       12.13 o
   3   8   0       -4.30        0.19        2.19 o
   4   8   0       80.02       70.15        7.55 o
   5   8   0        6.16        0.02        9.67 o
   6   8   0       43.86       41.85       14.11 o
   1   9   0       -3.15        0.36        1.42 o
   2   9   0     6642.05     6648.32       85.26 o
   3   9   0       -3.51        0.05        2.70 o
   4   9   0        7.10        5.22        6.77 o
   5   9   0      -10.56        0.03       13.08 o
   6   9   0       10.39       12.57       17.95 o
   0  10   0      607.17      583.02       13.09 o
   1  10   0       -0.20        0.33        0.43 o
   2  10   0     2222.05     2186.28       31.27 o
   3  10   0       -0.57        0.13        0.69 o
   4  10   0       -4.01        1.91        5.32 o
   5  10   0        0.38        0.30        1.83 o
   6  10   0       -7.74        0.19       10.43 o
   1  11   0       -0.14        0.03        0.37 o
   2  11   0       54.80       43.69        5.32 o
   3  11   0       -0.36        1.85        0.68 o
   4  11   0        2.95        0.90        5.21 o
   5  11   0        3.44        0.06        6.50 o
   6  11   0       -5.23        6.06        8.45 o
   0  12   0      427.64      406.84       10.70 o
   1  12   0       -3.52        0.04        1.68 o
   2  12   0     2316.19     2321.08       32.50 o
   3  12   0        1.33        0.17        1.89 o
   4  12   0       59.91       62.87        8.50 o
   5  12   0       -1.09        0.58        3.54 o
   6  12   0       -8.96        1.64       13.56 o
   1  13   0       -2.78        0.00        1.60 o
   2  13   0     3480.75     3289.88       46.78 o
   3  13   0       -0.04        0.92        0.83 o
   4  13   0       -2.10        2.06        3.94 o
   5  13   0       -3.10        0.18        5.45 o
   6  13   0       -3.58       10.35        9.11 o
   0  14   0       65.86       65.56        5.12 o
   1  14   0       -1.52        0.54        1.44 o
   2  14   0      265.82      259.22        7.35 o
   3  14   0        6.31        0.11        3.59 o
   4  14   0        6.78        7.48        7.14 o
   5  14   0       14.33        0.14       11.11 o
   6  14   0        3.01        4.05        9.35 o
   1  15   0       -1.88        0.00        1.50 o
   2  15   0      343.22      310.85        8.45 o
   3  15   0      -11.93        0.60        6.89 o
   4  15   0       31.29       23.07        8.51 o
   5  15   0        0.75        0.34        1.83 o
   6  15   0       10.32        1.28       14.59 o
   0  16   0       51.89       46.80        5.37 o
   1  16   0        1.06        0.00        1.37 o
   2  16   0      397.78      307.04       10.21 o
   3  16   0       -4.30        0.01        2.75 o
   4  16   0      174.35      143.57       12.99 o
   5  16   0        8.71        0.14       11.62 o
   6  16   0        2.22        1.48        5.58 o
   1  17   0       -1.88        0.02        2.14 o
   2  17   0       -3.01        0.77        1.64 o
   3  17   0        1.36        0.08        2.49 o
   4  17   0       93.51      102.01       10.91 o
   5  17   0        8.71        0.14       10.24 o
   6  17   0       -9.53        0.51       15.03 o
   0  18   0       30.46       19.33        7.27 o
   1  18   0       -3.52        0.00        2.10 o
   2  18   0        1.58        2.18        1.68 o
   3  18   0        1.35        0.09        2.02 o
   4  18   0       32.34       27.69       10.30 o
   5  18   0        3.50        0.16        7.81 o
   6  18   0        3.44        0.04        8.30 o
   1  19   0        2.50        0.09        1.96 o
   2  19   0        2.11        2.96        1.56 o
   3  19   0        9.56        0.02        9.77 o
   4  19   0       62.67       54.94       10.32 o
   5  19   0       -2.06        0.02        3.97 o
   6  19   0       -4.52       22.87        8.60 o
   0  20   0       87.63       85.36        7.15 o
   1  20   0       -1.60        0.12        1.81 o
   2  20   0        8.06        7.11        6.22 o
   3  20   0        1.00        0.02        2.20 o
   4  20   0        7.05        9.21       10.19 o
   5  20   0       -5.96        0.10        6.51 o
   6  20   0        5.81        6.86       12.46 o
   1  21   0       -1.60        0.22        1.44 o
   2  21   0       -1.97        1.37        1.80 o
   3  21   0        0.67        0.06        1.26 o
   4  21   0       -7.40        0.79        8.41 o
   5  21   0        5.39        1.00        5.88 o
   6  21   0      -12.10        0.49       12.29 o
   0  22   0    16852.24    13468.23      265.49 x
   1  22   0        0.98        0.03        0.68 o
   2  22   0       -2.66        3.67        2.81 o
   3  22   0       -1.86        0.25        3.28 o
   4  22   0      -10.15        1.13       10.82 o
   5  22   0       -1.26        0.17        3.74 o
   6  22   0      -10.78        1.84       14.91 o
   1  23   0       -0.37        0.05        0.60 o
   2  23   0       -2.70        0.23        2.60 o
   3  23   0       -4.44        0.63        4.92 o
   4  23   0        8.03        1.74       12.23 o
   5  23   0       -6.08        0.00       11.26 o
   6  23   0        3.50       14.05        6.00 o
   0  24   0      943.36      689.08       21.93 o
   1  24   0        2.83        1.14        1.82 o
   2  24   0      124.66      126.61        7.39 o
   3  24   0       -4.07        0.00        4.76 o
   4  24   0      108.07      105.72       11.75 o
   5  24   0        0.00        0.05        1.49 o
   6  24   0        4.47        2.86        8.21 o
   1  25   0       -1.39        0.33        1.76 o
   2  25   0        0.67        0.69        1.14 o
   3  25   0       -0.23        0.04        1.27 o
   4  25   0      407.53      437.48       17.47 o
   5  25   0        0.86        0.32        2.12 o
   6  25   0       83.28       78.74       15.09 o
   0  26   0      945.80      793.91       22.37 o
   1  26   0       -2.83        1.02        1.69 o
   2  26   0        9.65       13.01        9.20 o
   3  26   0        8.83        0.07       10.08 o
   4  26   0      414.18      432.95       17.55 o
   5  26   0        2.64        0.23        4.90 o
   6  26   0       97.61      105.98       15.56 o
   1  27   0       -1.60        2.75        1.74 o
   2  27   0        5.26        0.73        5.73 o
   3  27   0        2.75        0.99        4.89 o
   4  27   0        6.77        1.47        9.05 o
   5  27   0        6.13        0.02       11.48 o
   0  28   0       17.27        7.92       14.44 o
   1  28   0       -1.15        2.74        1.88 o
   2  28   0      531.25      589.78       14.90 o
   3  28   0       -4.53        0.18        8.41 o
   4  28   0      364.47      388.03       17.01 o
   5  28   0       -3.10        0.00        9.52 o
   1  29   0        6.92        0.14        5.06 o
   2  29   0      335.69      357.32       12.48 o
   3  29   0        3.44        0.36        6.93 o
   4  29   0      352.43      383.47       16.93 o
   5  29   0       -1.89        1.67        3.71 o
   0  30   0      842.38      684.05       21.68 o
   1  30   0       -4.26        0.47        4.11 o
   2  30   0       24.32       28.58       17.57 o
   3  30   0       -8.37        3.03        6.44 o
   4  30   0       13.70       15.88       12.39 o
   5  30   0       -8.77        0.00       11.21 o
   1  31   0       -4.05        0.02        3.28 o
   2  31   0      667.56      735.14       17.91 o
   3  31   0       16.17        1.10       16.40 o
   4  31   0        5.91        0.70        8.06 o
   5  31   0      -17.20        0.01       12.09 o
   0  32   0       14.69        0.43       13.28 o
   1  32   0       -5.90        0.09        4.45 o
   2  32   0      886.67      933.77       21.09 o
   3  32   0       10.38        0.45       11.53 o
   4  32   0       26.55       24.53       24.65 o
   5  32   0        5.50        0.00        7.86 o
   1  33   0       -4.46        0.04        4.88 o
   2  33   0      877.31      935.71       21.18 o
   3  33   0        5.45        2.06        7.68 o
   4  33   0       78.55       73.16       11.06 o
   5  33   0       -0.40        0.16        2.33 o
   0  34   0      696.47      592.72       19.94 o
   1  34   0        0.45        0.04        0.72 o
   2  34   0     1387.20     1442.65       28.91 o
   3  34   0       -5.68        0.05        7.16 o
   4  34   0       33.31       23.44        9.30 o
   5  34   0       -1.03        0.01        4.05 o
   1  35   0       -6.31        0.68        6.14 o
   2  35   0     4617.07     4930.07       74.92 o
   3  35   0       19.84        0.99       18.34 o
   4  35   0       21.73       22.01       24.38 o
   5  35   0       -7.57        0.00        8.28 o
   0  36   0        2.87        0.04        7.27 o
   1  36   0        0.69        1.35        1.24 o
   2  36   0     1170.95     1182.09       26.08 o
   3  36   0        9.63        2.19       11.21 o
   4  36   0        6.99        1.68        9.99 o
   5  36   0        2.12        0.07        5.91 o
   1  37   0       -4.19        0.46        6.30 o
   2  37   0      405.35      375.52       15.01 o
   3  37   0        2.98        0.41        6.86 o
   4  37   0        2.29        0.11        4.74 o
   5  37   0        4.82        0.00       11.54 o
   0  38   0      603.82      554.78       23.52 o
   1  38   0        2.01        0.32        4.72 o
   2  38   0      845.92      864.91       21.62 o
   3  38   0       -9.29        0.11       12.65 o
   4  38   0      316.20      376.60       17.11 o
   5  38   0       -4.13        0.02        8.94 o
   1  39   0       -9.46        0.65        7.75 o
   2  39   0        9.32        4.47       11.23 o
   3  39   0        0.63        1.53        1.59 o
   4  39   0      647.99      731.23       23.56 o
   5  39   0       -4.87        0.01       10.11 o
   0  40   0       -6.02        1.63        8.29 o
   1  40   0        8.50        8.30        9.22 o
   2  40   0       -3.55        0.78        5.65 o
   3  40   0        4.01        0.07        4.81 o
   4  40   0       39.39       23.48        9.73 o
   5  40   0       -3.04        1.00        6.72 o
   1  41   0        3.39        2.25        5.24 o
   2  41   0       87.89       85.75       10.84 o
   3  41   0       -2.01        0.10        3.93 o
   4  41   0      632.34      638.99       23.57 o
   0  42   0     1371.72     1198.73       40.22 o
   1  42   0        1.55        0.26        4.08 o
   2  42   0      160.76      141.03       12.95 o
   3  42   0       -1.03        0.64        3.09 o
   4  42   0      595.07      623.10       23.00 o
   1  43   0        3.21        0.00        5.23 o
   2  43   0        1.08        2.04        3.82 o
   3  43   0        2.75        0.41        6.82 o
   4  43   0       23.22        5.05       20.56 o
   0  44   0     3442.34     3455.18      101.46 o
   1  44   0       -1.66        0.01        4.38 o
   2  44   0        4.16        0.43       10.29 o
   3  44   0       -0.75        0.01        1.61 o
   4  44   0       26.03       30.16       27.14 o
   1  45   0       -2.18        1.72        3.85 o
   2  45   0       15.77       24.31       18.54 o
   3  45   0       -3.96        0.00        7.17 o
   4  45   0        8.14        3.53       15.16 o
   0  46   0      231.20      207.40       22.46 o
   1  46   0       -1.95        1.00        4.68 o
   2  46   0       59.23       44.19       11.84 o
   3  46   0        8.31        0.02       11.64 o
   4  46   0       48.56       47.64       11.91 o
   1  47   0        5.45        1.78        9.37 o
   2  47   0       22.86       10.41       31.29 o
   3  47   0        2.58        0.17        7.36 o
   4  47   0      192.28      135.66       17.75 o
   0  48   0      141.47       96.00       19.16 o
   1  48   0        4.53        0.14        7.08 o
   2  48   0        7.67        0.19       11.35 o
   3  48   0        4.73        0.07        6.45 o
   4  48   0       70.81       47.13       13.51 o
   1  49   0        8.03        1.07       12.46 o
   2  49   0       -2.37        3.33        4.99 o
   3  49   0        5.16        0.52        9.22 o
   0  50   0        6.59        1.81       12.34 o
   1  50   0       -5.73        0.47        8.84 o
   2  50   0        6.31       14.82       12.47 o
   3  50   0        7.22        0.21       12.29 o
   1  51   0       -0.52        0.63        2.45 o
   2  51   0       37.34       37.73       12.81 o
   3  51   0        0.43        0.39        2.24 o
   0  52   0       21.93        9.19       25.45 o
   1  52   0        2.01        0.08        7.61 o
   2  52   0        2.29       18.73        6.27 o
   3  52   0       -5.45        0.03        9.97 o
   1  53   0       -4.59        0.10       10.09 o
   2  53   0       -7.88        1.28       12.06 o
   3  53   0       -2.72        0.07        4.96 o
   0  54   0        2.44        4.12        7.52 o
   1  54   0        7.45        0.03       11.73 o
   2  54   0       21.00       29.07       26.07 o
   3  54   0       -5.66        0.04       10.81 o
   1  55   0       -4.49        0.06        8.79 o
   2  55   0        5.52        3.07       10.73 o
   0  56   0        1.15        0.74        9.54 o
   1  56   0       -8.31        0.03       10.57 o
   2  56   0       44.36       31.59       14.00 o
   1  57   0        2.58        0.05        8.85 o
   2  57   0       40.78       35.87       15.36 o
   0  58   0       29.10       10.13       23.21 o
   1  58   0        6.88        0.01       17.22 o
   2  58   0       32.20       44.45       13.64 o
   1  59   0       -2.68        0.00        6.60 o
   0  60   0       -9.75        5.57       23.09 o
   1  60   0       -7.64        0.06       14.22 o
  -6   1   1        1.17        0.23        3.36 o
  -5   1   1      132.78      125.14       10.51 o
  -4   1   1       11.62        7.90        9.26 o
  -3   1   1       81.47       74.06        6.88 o
  -2   1   1        7.40        3.40        3.96 o
  -1   1   1      927.31      980.74       18.66 o
   0   1   1        0.20        1.37        0.06 o
   1   1   1     3935.41     4148.58       46.51 o
   2   1   1        6.05        8.46        2.87 o
   3   1   1        0.16        0.28        0.97 o
   4   1   1        7.73       14.13        6.18 o
   5   1   1      823.91      799.99       19.96 o
   6   1   1        4.54        1.73        8.14 o
  -6   2   1        8.82        0.94       12.92 o
  -5   2   1     2669.27     2809.95       50.00 o
  -4   2   1       13.50       20.73        9.63 o
  -3   2   1        7.87        6.45        5.69 o
  -2   2   1        2.56        1.03        1.71 o
  -1   2   1      122.80      130.17        4.68 o
   0   2   1       -0.14        2.32        0.07 o
   1   2   1     2447.03     2551.79       31.50 o
   2   2   1       13.13        6.87        5.71 o
   3   2   1        5.24        3.67        3.90 o
   4   2   1        0.18        0.14        1.28 o
   5   2   1     1630.09     1686.42       31.94 o
   6   2   1        0.88        0.01        3.88 o
  -6   3   1       -2.58        0.23        7.80 o
  -5   3   1        1.81        1.70        1.41 o
  -4   3   1       13.88       12.13       12.95 o
  -3   3   1       52.70       45.87        5.68 o
  -2   3   1        0.30        0.23        0.46 o
  -1   3   1      671.07      702.51       17.33 o
   0   3   1       51.03       50.33        1.99 o
   1   3   1     8077.79     8674.13       97.58 o
   2   3   1        2.30        1.78        2.32 o
   3   3   1       35.83       32.48        5.82 o
   4   3   1        6.44        6.60        6.80 o
   5   3   1      626.67      640.89       18.57 o
   6   3   1      -10.58        0.06       22.93 o
  -6   4   1        6.03        0.51       10.08 o
  -5   4   1      104.38      112.66       12.91 o
  -4   4   1       11.85       11.30        5.54 o
  -3   4   1       30.27       27.69        4.65 o
  -2   4   1        0.22        0.42        0.57 o
  -1   4   1    24606.92    25491.65      316.71 o
   0   4   1        5.77        9.68        1.02 o
   1   4   1     2487.88     2608.45       52.33 o
   2   4   1        8.12        3.72        3.70 o
   3   4   1       47.04       46.80        5.33 o
   4   4   1       98.97       94.11        7.98 o
   5   4   1        2.81        2.20        2.96 o
   6   4   1       -8.44        0.43       18.01 o
  -6   5   1       -4.17        0.21       12.05 o
  -5   5   1       37.70       38.26       10.92 o
  -4   5   1      130.56      118.36        9.71 o
  -3   5   1      160.10      144.33        8.27 o
  -2   5   1       -0.50        0.27        0.39 o
  -1   5   1    18455.27    18282.91      242.62 o
   0   5   1        7.42        6.01        1.45 o
   1   5   1    15649.73    16607.01      195.60 o
   2   5   1        7.04        4.43        5.11 o
   3   5   1        6.97        6.25        2.55 o
   4   5   1       47.33       51.66        6.03 o
   5   5   1       55.47       56.33       10.36 o
   6   5   1       -9.70        1.32       15.19 o
  -6   6   1        1.83        1.46        5.16 o
  -5   6   1      128.44      131.33       12.11 o
  -4   6   1       55.96       53.53        9.05 o
  -3   6   1       39.57       36.99        4.51 o
  -2   6   1       22.43       22.29        9.38 o
  -1   6   1     1987.63     1987.76       53.78 o
   0   6   1        9.07        7.39        1.98 o
   1   6   1    18544.96    19511.31      207.22 o
   2   6   1       48.96       49.22        5.82 o
   3   6   1      215.27      195.29        8.55 o
   4   6   1        0.90        0.90        1.60 o
   5   6   1       23.37       37.58        7.83 o
   6   6   1       -4.29        2.13        8.15 o
  -6   7   1       14.31        0.66       18.96 o
  -5   7   1        1.64        2.21        4.91 o
  -4   7   1        0.05        0.03        1.59 o
  -3   7   1       92.99       92.75        5.18 o
  -2   7   1      264.30      273.53        7.25 o
  -1   7   1     5963.76     6212.14       72.92 o
   0   7   1      157.20      165.38        3.76 o
   1   7   1        6.45        7.27        1.23 o
   2   7   1       98.15       95.24        4.94 o
   3   7   1     1308.64     1299.11       20.64 o
   4   7   1       27.76       29.39       15.56 o
   5   7   1      118.25      101.72       11.25 o
   6   7   1       36.19        0.67       21.58 o
  -6   8   1       -1.34        1.72        5.77 o
  -5   8   1       71.29       62.42       11.16 o
  -4   8   1       19.44       11.73       10.71 o
  -3   8   1     3268.77     3238.01       45.09 o
  -2   8   1      186.34      162.86        6.90 o
  -1   8   1      534.77      575.39       10.23 o
   0   8   1       36.16       33.91        2.56 o
   1   8   1      626.23      661.98       10.15 o
   2   8   1      187.39      171.01        6.12 o
   3   8   1     2221.37     2276.68       33.83 o
   4   8   1       15.78       15.10       12.84 o
   5   8   1       19.50       13.95        8.65 o
   6   8   1       -3.70        0.52        9.28 o
  -6   9   1       15.39        0.82       21.97 o
  -5   9   1       10.47       18.09       17.45 o
  -4   9   1        0.64        3.45        1.11 o
  -3   9   1     1582.06     1593.01       26.25 o
  -2   9   1       55.31       49.85        4.63 o
  -1   9   1       66.60       63.95        3.93 o
   0   9   1        4.01        4.26        1.29 o
   1   9   1        1.50        1.36        1.77 o
   2   9   1      658.81      615.96       11.62 o
   3   9   1       24.58       24.78        2.70 o
   4   9   1        7.09        9.06        6.06 o
   5   9   1       20.04       21.12       15.08 o
   6   9   1       -0.99        0.05        1.73 o
  -6  10   1        2.31        0.77        5.91 o
  -5  10   1       19.15       17.83       24.78 o
  -4  10   1        2.06        2.97        3.33 o
  -3  10   1       34.38       31.62        4.87 o
  -2  10   1      341.39      317.16        9.10 o
  -1  10   1      358.43      355.59        8.01 o
   0  10   1        0.36        0.98        0.32 o
   1  10   1     1535.02     1558.39       20.07 o
   2  10   1        2.08        2.08        0.80 o
   3  10   1     1128.09     1171.29       21.04 o
   4  10   1       -0.03        0.02        1.20 o
   5  10   1        0.71        0.31        1.68 o
   6  10   1        4.33        1.44        7.64 o
  -6  11   1        3.47        3.82        7.31 o
  -5  11   1        2.67        5.33        6.80 o
  -4  11   1       -2.48        0.10        3.76 o
  -3  11   1     1967.84     1798.54       30.35 o
  -2  11   1        2.81        2.38        5.08 o
  -1  11   1     1734.85     1835.11       22.17 o
   0  11   1       62.35       57.99        4.11 o
   1  11   1       66.96       75.52        3.19 o
   2  11   1       78.41       73.21        4.94 o
   3  11   1     2157.85     1995.72       34.58 o
   4  11   1       -2.73        0.66        4.10 o
   5  11   1       35.46       43.87       14.29 o
   6  11   1       -7.44        2.53       17.37 o
  -6  12   1        8.01        0.25        9.83 o
  -5  12   1       40.53       33.14       10.05 o
  -4  12   1       11.30       13.27       10.48 o
  -3  12   1        0.36        0.33        0.32 o
  -2  12   1     1417.43     1432.17       20.26 o
  -1  12   1       19.78       22.00        2.19 o
   0  12   1       49.24       57.85        3.59 o
   1  12   1      434.59      446.32        8.23 o
   2  12   1      195.64      197.68        6.30 o
   3  12   1      796.05      787.48       16.25 o
   4  12   1       24.23       12.36       13.84 o
   5  12   1        7.64        4.80        9.62 o
   6  12   1        4.14        0.41        9.31 o
  -6  13   1        0.00        1.12        2.57 o
  -5  13   1        0.50        4.34        1.92 o
  -4  13   1        1.10        0.12        2.86 o
  -3  13   1      487.08      402.34       13.19 o
  -2  13   1       59.19       50.31        3.66 o
  -1  13   1       70.60       75.23        4.33 o
   0  13   1       33.47       31.16        4.29 o
   1  13   1       22.37       26.73        4.35 o
   2  13   1      928.70      866.40       14.81 o
   3  13   1      186.06      164.85        7.52 o
   4  13   1        1.71        1.36        2.30 o
   5  13   1       19.59       14.65       17.80 o
   6  13   1        0.97        0.14        2.25 o
  -6  14   1       -4.66        9.02       11.10 o
  -5  14   1      -14.88        3.69       13.84 o
  -4  14   1        0.22        0.06        1.42 o
  -3  14   1     1489.24     1251.44       25.73 o
  -2  14   1      590.86      563.59       12.00 o
  -1  14   1      180.99      184.26        5.57 o
   0  14   1        2.26        6.00        1.55 o
   1  14   1      430.48      431.82        8.55 o
   2  14   1     1570.41     1483.25       24.55 o
   3  14   1      566.58      517.04       13.03 o
   4  14   1       11.59        5.51       11.07 o
   5  14   1        5.20        1.03        8.46 o
   6  14   1       -2.63        7.65        7.25 o
  -6  15   1       24.65       17.19       32.60 o
  -5  15   1       13.26        9.35       12.46 o
  -4  15   1        0.08        0.38        1.85 o
  -3  15   1      116.42       98.95        7.13 o
  -2  15   1     1224.62     1210.28       18.41 o
  -1  15   1      768.61      799.73       12.23 o
   0  15   1        5.41        3.79        2.83 o
   1  15   1       18.51       19.29        1.95 o
   2  15   1      309.94      303.56        9.06 o
   3  15   1      475.27      434.24       12.85 o
   4  15   1        5.50        7.72        5.70 o
   5  15   1       10.09       15.17       12.60 o
   6  15   1       -0.53        0.98        1.81 o
  -6  16   1        0.08        0.17        2.62 o
  -5  16   1      -12.76        6.73       12.68 o
  -4  16   1        4.37        4.80        7.75 o
  -3  16   1        6.93        5.75        7.08 o
  -2  16   1       21.32       19.02        2.71 o
  -1  16   1        3.32        3.45        0.92 o
   0  16   1       63.75       57.48        4.31 o
   1  16   1      334.15      379.78        7.68 o
   2  16   1      193.15      208.66        8.32 o
   3  16   1       84.39       59.07        7.83 o
   4  16   1       35.13       39.77       11.40 o
   5  16   1       -0.28        0.05        1.52 o
   6  16   1       45.20       41.45       15.27 o
  -6  17   1       40.01       44.00       12.69 o
  -5  17   1       -6.16        2.29       10.40 o
  -4  17   1      171.04      157.03       13.16 o
  -3  17   1       43.52       33.38        8.66 o
  -2  17   1       19.64       20.54        9.06 o
  -1  17   1      133.16      135.97        5.14 o
   0  17   1      176.34      174.54        5.91 o
   1  17   1      201.96      203.46        6.31 o
   2  17   1       19.53       23.09       13.13 o
   3  17   1       12.72       11.07        9.74 o
   4  17   1        8.74        7.86        3.64 o
   5  17   1        8.32        7.79       14.12 o
   6  17   1       59.70       64.14       14.01 o
  -6  18   1       57.18       58.43       16.24 o
  -5  18   1       -3.12        0.44        5.51 o
  -4  18   1      147.23      160.04       12.08 o
  -3  18   1       16.21       12.09        9.27 o
  -2  18   1        8.86       10.14        5.21 o
  -1  18   1       28.10       24.35        3.20 o
   0  18   1        3.05        2.98        2.22 o
   1  18   1      103.73       81.34        5.19 o
   2  18   1       35.05       26.41        6.13 o
   3  18   1        4.92        2.66        5.05 o
   4  18   1      167.04      164.61       11.48 o
   5  18   1       -7.24        1.99       13.37 o
   6  18   1        1.83        1.37        6.79 o
  -6  19   1        4.58        3.73        8.92 o
  -5  19   1       12.19        9.35       13.00 o
  -4  19   1        4.60        4.92        4.27 o
  -3  19   1       -0.02        0.03        1.03 o
  -2  19   1      135.68      131.18        6.37 o
  -1  19   1      154.03      147.03        6.05 o
   0  19   1       26.95       18.30       10.17 o
   1  19   1        0.04        0.03        0.31 o
   2  19   1       15.49       16.37        3.98 o
   3  19   1       25.33       17.23       18.91 o
   4  19   1      180.93      189.79       14.06 o
   5  19   1        0.94        3.47        1.37 o
   6  19   1        5.48       11.10        8.69 o
  -6  20   1        2.02       16.56        7.42 o
  -5  20   1       61.95       75.44       10.79 o
  -4  20   1      135.10      151.48       12.45 o
  -3  20   1       19.37       26.93       14.08 o
  -2  20   1        0.11        0.13        1.17 o
  -1  20   1        7.14        6.57        5.59 o
   0  20   1      151.25      152.91        5.86 o
   1  20   1       80.19       77.41        5.00 o
   2  20   1       92.71       94.50        6.86 o
   3  20   1        6.48       11.67        6.34 o
   4  20   1        0.42        0.40        0.97 o
   5  20   1      116.65      121.61       14.83 o
   6  20   1       10.07       16.12       17.62 o
  -6  21   1       12.05        0.97       18.08 o
  -5  21   1       97.20       99.14       12.89 o
  -4  21   1       34.62       39.69        9.79 o
  -3  21   1        0.13        0.03        1.30 o
  -2  21   1       31.39       31.11       12.89 o
  -1  21   1      121.10      124.27        5.31 o
   0  21   1     3975.69     3686.54       52.71 o
   1  21   1      319.00      285.52        8.08 o
   2  21   1       12.52       12.73        7.16 o
   3  21   1        5.35        9.04        5.31 o
   4  21   1       67.04       55.35       10.90 o
   5  21   1       10.12        8.43        8.55 o
   6  21   1       11.35        0.38       22.43 o
  -6  22   1       -0.01        0.00        3.70 o
  -5  22   1       71.83       78.09       13.10 o
  -4  22   1        3.66        0.59        6.02 o
  -3  22   1        8.07        4.94        8.73 o
  -2  22   1        4.24        2.69        3.86 o
  -1  22   1        0.55        0.57        0.79 o
   0  22   1     1145.79     1036.96       18.30 o
   1  22   1       18.55       20.84       10.25 o
   2  22   1        0.95        4.88        1.00 o
   3  22   1        0.57        0.39        1.17 o
   4  22   1        8.57        7.46       11.08 o
   5  22   1        0.21        0.28        1.75 o
   6  22   1       10.83        0.47       19.82 o
  -6  23   1       -1.77        0.35        7.19 o
  -5  23   1        1.94        2.96        2.27 o
  -4  23   1       24.07       15.28       22.19 o
  -3  23   1        2.35        9.66        4.80 o
  -2  23   1       43.13       31.35        5.72 o
  -1  23   1        0.20        0.17        1.06 o
   0  23   1     1587.58     1437.17       23.84 o
   1  23   1      101.42       96.48        6.47 o
   2  23   1        2.54        2.07        3.41 o
   3  23   1        9.47       10.75        7.77 o
   4  23   1       33.35       29.39       14.01 o
   5  23   1      255.85      303.18       19.95 o
   6  23   1       -6.98        2.61       11.22 o
  -6  24   1       20.38       12.20       31.66 o
  -5  24   1      390.88      414.78       18.88 o
  -4  24   1      106.37       77.46       11.67 o
  -3  24   1       32.95       34.45       21.26 o
  -2  24   1        2.60        4.00        3.27 o
  -1  24   1       62.36       53.51        4.97 o
   0  24   1        9.17        0.13        5.05 o
   1  24   1       72.96       56.76        5.22 o
   2  24   1       62.65       55.74        7.03 o
   3  24   1        2.89        4.94        4.55 o
   4  24   1       24.90       19.77        7.27 o
   5  24   1      185.57      200.10       17.40 o
   6  24   1        2.84       10.05       10.67 o
  -6  25   1        3.69        0.84       13.08 o
  -5  25   1        0.02        0.04        2.39 o
  -4  25   1        0.71        0.71        1.54 o
  -3  25   1       11.71        5.75       10.69 o
  -2  25   1       47.04       56.63        7.94 o
  -1  25   1       49.46       45.91        3.39 o
   0  25   1      315.87      294.24        8.44 o
   1  25   1     1365.04     1310.35       20.27 o
   2  25   1       12.08        9.66       11.94 o
   3  25   1       40.72       31.88        9.99 o
   4  25   1       40.49       40.16       11.14 o
   5  25   1       78.47       64.75       14.67 o
   6  25   1        9.69       11.78       17.41 o
  -5  26   1        4.88        3.73        9.59 o
  -4  26   1       20.28       24.03       17.33 o
  -3  26   1       11.86       15.96        9.86 o
  -2  26   1        2.12        3.25        2.19 o
  -1  26   1     1831.63     1858.04       25.37 o
   0  26   1       15.37       10.02        8.03 o
   1  26   1        5.75        5.70        1.15 o
   2  26   1        5.50       13.00        7.14 o
   3  26   1        7.35       13.05        8.35 o
   4  26   1       29.99       37.61       29.12 o
   5  26   1        3.84        3.06       12.68 o
  -5  27   1       17.97       19.38       21.43 o
  -4  27   1       48.72       46.95       11.54 o
  -3  27   1       39.27       52.81       12.93 o
  -2  27   1       13.81       20.05        7.71 o
  -1  27   1     2814.62     2851.79       38.16 o
   0  27   1       22.61       22.00       12.18 o
   1  27   1     1574.21     1607.91       26.87 o
   2  27   1       -0.19        1.54        1.47 o
   3  27   1        5.43       10.25        8.18 o
   4  27   1       32.83       25.63       12.09 o
   5  27   1       -5.92       22.85        9.09 o
  -5  28   1       49.22       43.52       14.87 o
  -4  28   1        2.83        9.64        7.34 o
  -3  28   1       49.01       76.20       11.79 o
  -2  28   1        6.56        5.40        5.66 o
  -1  28   1      756.44      746.18       17.62 o
   0  28   1       -0.33        4.08        0.81 o
   1  28   1     3397.41     3323.84       46.33 o
   2  28   1       76.21       65.09        8.52 o
   3  28   1        9.37       13.28        8.84 o
   4  28   1        5.43        1.67       10.65 o
   5  28   1       -1.34        8.29        4.71 o
  -5  29   1       -0.39        0.25        1.46 o
  -4  29   1       -3.69        0.73        5.44 o
  -3  29   1        5.81        6.11        2.47 o
  -2  29   1      114.20      121.72        8.23 o
  -1  29   1      684.39      645.43       14.89 o
   0  29   1        7.94        1.54        5.50 o
   1  29   1       78.66       80.27        7.21 o
   2  29   1        3.04        2.79        3.07 o
   3  29   1      639.59      683.32       18.62 o
   4  29   1       -1.46        0.44        2.99 o
   5  29   1       50.44       24.82       17.81 o
  -5  30   1        0.81        6.98        2.00 o
  -4  30   1        3.76        0.35        6.33 o
  -3  30   1     1485.69     1713.97       35.08 o
  -2  30   1      100.85      114.59        9.81 o
  -1  30   1      132.08      127.66        8.15 o
   0  30   1       -4.30        0.80        3.59 o
   1  30   1       45.53       40.61        5.03 o
   2  30   1      102.41      122.15        8.86 o
   3  30   1     1413.27     1622.70       32.07 o
   4  30   1        9.82        3.03       12.23 o
   5  30   1        6.10        1.99       12.39 o
  -5  31   1        6.02        6.22        8.97 o
  -4  31   1        0.67        2.21        1.27 o
  -3  31   1     1480.67     1552.71       33.85 o
  -2  31   1       14.37       12.58       13.08 o
  -1  31   1        2.12        1.99        2.98 o
   0  31   1        6.77        0.33        5.83 o
   1  31   1        7.52        3.53        5.38 o
   2  31   1       62.53       71.47       10.76 o
   3  31   1       65.60       69.75        6.69 o
   4  31   1       -3.42        0.67        7.42 o
   5  31   1       11.89        5.65       12.64 o
  -5  32   1       13.51       16.58       18.50 o
  -4  32   1       -1.98        2.01        4.80 o
  -3  32   1      279.43      305.48       15.31 o
  -2  32   1       24.70       18.63       23.45 o
  -1  32   1       91.25       81.17        6.79 o
   0  32   1        9.07        0.92        6.06 o
   1  32   1      284.29      297.22       11.82 o
   2  32   1       -1.72        1.49        3.65 o
   3  32   1      581.26      568.75       19.08 o
   4  32   1       -1.78        0.16        4.85 o
   5  32   1        0.28        0.68        2.96 o
  -5  33   1        0.17        0.12        2.06 o
  -4  33   1        0.27        0.08        1.73 o
  -3  33   1     1083.72     1222.79       29.29 o
  -2  33   1       15.48        7.88       15.25 o
  -1  33   1      450.98      474.12       12.93 o
   0  33   1        1.43        0.44        2.07 o
   1  33   1       12.29       11.63        2.84 o
   2  33   1        1.02        1.23        2.91 o
   3  33   1     1862.92     1959.99       44.32 o
   4  33   1        1.07        1.48        3.37 o
   5  33   1       31.97       16.11       24.03 o
  -5  34   1       -2.97        4.10        6.70 o
  -4  34   1      -10.17        1.04       12.93 o
  -3  34   1        0.28        0.33        0.65 o
  -2  34   1       11.05        9.65       13.41 o
  -1  34   1        8.89        8.78       10.27 o
   0  34   1        0.82        2.38        0.84 o
   1  34   1      104.83       92.60        9.08 o
   2  34   1       40.12       35.13       11.32 o
   3  34   1      365.37      354.29       17.02 o
   4  34   1        5.24        1.31       11.16 o
   5  34   1        8.30        2.28       16.08 o
  -5  35   1       -3.04        0.84        7.26 o
  -4  35   1       -0.63        0.51        2.11 o
  -3  35   1       55.08       52.74        7.79 o
  -2  35   1        5.45        6.33        7.95 o
  -1  35   1        6.91        5.50        7.24 o
   0  35   1        2.95        2.57        3.71 o
   1  35   1        0.08        0.01        1.62 o
   2  35   1        1.75        1.17        2.79 o
   3  35   1      507.25      502.81       19.11 o
   4  35   1      -10.74        1.21       14.94 o
   5  35   1       -4.33        2.08        9.46 o
  -5  36   1       10.95       17.11       15.06 o
  -4  36   1      -11.45        0.78       13.56 o
  -3  36   1     1088.69     1192.37       28.92 o
  -2  36   1        4.48        9.37        7.90 o
  -1  36   1      104.53      107.09        7.98 o
   0  36   1       -6.68        0.62        5.47 o
   1  36   1      131.74      126.48        9.52 o
   2  36   1        0.41        4.06        1.84 o
   3  36   1      179.83      170.77       11.46 o
   4  36   1       -2.38        0.96        4.54 o
   5  36   1        3.59        3.66        9.11 o
  -5  37   1        0.03        0.09        1.49 o
  -4  37   1       -2.30        0.39        5.22 o
  -3  37   1      488.45      538.59       19.23 o
  -2  37   1       -6.38        0.97        8.39 o
  -1  37   1      738.30      805.70       17.09 o
   0  37   1       -4.68        0.90        5.99 o
   1  37   1       27.73       27.22        4.05 o
   2  37   1       -1.88        0.62        4.77 o
   3  37   1      401.83      438.98       17.14 o
   4  37   1       -0.06        0.01        1.72 o
   5  37   1       34.48       34.86       34.03 o
  -5  38   1        2.99       13.81        8.71 o
  -4  38   1        5.05        2.73       10.23 o
  -3  38   1      187.53      199.69       12.96 o
  -2  38   1       -7.55        1.84       10.39 o
  -1  38   1       48.85       40.84        5.17 o
   0  38   1        6.83        0.87        6.76 o
   1  38   1      587.62      589.80       16.88 o
   2  38   1       -6.20        0.91        6.91 o
   3  38   1      760.88      761.77       23.66 o
   4  38   1        6.86        0.92       10.06 o
   5  38   1       12.11        7.31       14.96 o
  -5  39   1       10.52        0.92       12.78 o
  -4  39   1       -0.44        0.03        2.55 o
  -3  39   1      152.54      163.10       13.84 o
  -2  39   1       -0.60        1.49        1.76 o
  -1  39   1      282.54      277.17       11.93 o
   0  39   1       -3.58        0.05        4.55 o
   1  39   1     1489.06     1508.17       28.98 o
   2  39   1        3.22        1.12        6.24 o
   3  39   1       24.41       17.19        6.16 o
   4  39   1       -7.08        0.65       10.43 o
   5  39   1       -3.59        0.28       10.09 o
  -4  40   1        1.18        0.93        3.38 o
  -3  40   1       16.07       27.96       14.10 o
  -2  40   1       -0.31        0.40        1.71 o
  -1  40   1     1697.49     1813.64       33.03 o
   0  40   1        6.02        6.77        7.20 o
   1  40   1     1162.08     1233.58       25.99 o
   2  40   1        9.79        3.14       10.52 o
   3  40   1       19.40       16.20       22.48 o
   4  40   1        1.83        0.57        5.85 o
  -4  41   1       -0.37        0.59        2.27 o
  -3  41   1        1.78        0.28        4.96 o
  -2  41   1       -2.29        2.99        4.91 o
  -1  41   1      845.38      835.67       21.28 o
   0  41   1        0.23        3.16        1.60 o
   1  41   1        5.41        5.02        2.17 o
   2  41   1        0.01        0.10        1.33 o
   3  41   1       12.31        3.45       13.73 o
   4  41   1       -3.03        3.46        5.24 o
  -4  42   1      -13.58        3.46       17.77 o
  -3  42   1       56.01       40.07       10.49 o
  -2  42   1        9.71        3.00       10.89 o
  -1  42   1      104.06      107.73        9.18 o
   0  42   1       20.07       11.56       21.77 o
   1  42   1      240.84      227.51       14.03 o
   2  42   1        0.80        1.34        1.66 o
   3  42   1       57.90       54.40       10.31 o
   4  42   1        3.36        1.35        5.59 o
  -4  43   1       -3.82        0.77        6.89 o
  -3  43   1       58.16       53.69       13.13 o
  -2  43   1        3.53        0.77        5.82 o
  -1  43   1      167.04      185.86       12.12 o
   0  43   1       94.77       71.26       10.36 o
   1  43   1      428.37      452.01       17.09 o
   2  43   1       -0.05        0.13        1.69 o
   3  43   1        4.38        5.91        7.11 o
   4  43   1       -4.60        0.57        8.68 o
  -4  44   1       -8.44        1.64        9.13 o
  -3  44   1       32.47       27.74       14.24 o
  -2  44   1       -3.84        0.38        7.24 o
  -1  44   1        7.56       17.98       12.36 o
   0  44   1       49.82       49.46        9.07 o
   1  44   1        0.41        0.25        1.85 o
   2  44   1       -8.49        2.75        7.97 o
   3  44   1       34.54       37.14       10.46 o
   4  44   1       -1.70        3.74        6.08 o
  -4  45   1       -0.30        0.79        2.49 o
  -3  45   1       -0.95        0.21        2.10 o
  -2  45   1        0.11        0.00        2.16 o
  -1  45   1        7.01        1.14        7.20 o
   0  45   1       16.05        5.49       22.16 o
   1  45   1        0.07        0.00        1.73 o
   2  45   1       -8.90        1.06        8.03 o
   3  45   1        1.72        7.73        4.49 o
   4  45   1       13.71        4.32       17.93 o
  -4  46   1       -7.56        8.99       15.94 o
  -3  46   1       42.07       39.66       10.17 o
  -2  46   1        0.08        0.13        1.96 o
  -1  46   1       83.24       89.15       13.14 o
   0  46   1       29.01       28.62       10.42 o
   1  46   1       14.67       15.00        6.68 o
   2  46   1       -4.91        0.47        6.34 o
   3  46   1       33.00       24.02       10.48 o
   4  46   1       -0.06        0.45        2.86 o
  -4  47   1       15.81       16.11       18.57 o
  -3  47   1       10.10       16.78       17.15 o
  -2  47   1       -0.06        0.62        1.87 o
  -1  47   1       72.98       82.57       10.65 o
   0  47   1       95.60       74.30       12.61 o
   1  47   1      375.40      418.95       17.01 o
   2  47   1       10.32        0.68       12.10 o
   3  47   1       16.67       12.54       20.20 o
   4  47   1        0.36        0.32        2.20 o
  -4  48   1        0.10        2.02        2.00 o
  -3  48   1       27.32       23.65       16.52 o
  -2  48   1        0.11        0.02        2.85 o
  -1  48   1      136.03      177.16       16.67 o
   0  48   1        1.72        5.12        5.95 o
   1  48   1       31.53       37.01        8.93 o
   2  48   1       -4.96        2.95        6.66 o
   3  48   1       12.32       30.48       15.36 o
   4  48   1       21.46       19.63       19.66 o
  -3  49   1        2.91        0.41        7.71 o
  -2  49   1       -2.78        0.05        6.13 o
  -1  49   1      295.61      371.62       22.16 o
   0  49   1       14.55        3.04       15.03 o
   1  49   1      104.73      117.65       10.62 o
   2  49   1       -3.65        0.33        4.03 o
   3  49   1       -2.26        4.65        6.48 o
  -3  50   1       32.02       32.53       25.45 o
  -2  50   1        3.91        2.44       10.27 o
  -1  50   1       45.56       59.48       10.87 o
   0  50   1        3.23        0.31        4.99 o
   1  50   1      210.29      262.59       14.93 o
   2  50   1       14.50        8.15       18.21 o
   3  50   1        9.71        7.87       14.90 o
  -3  51   1        5.76        6.86        8.64 o
  -2  51   1       25.16       16.62       27.96 o
  -1  51   1       39.23       44.15       19.33 o
   0  51   1       18.35       14.98       15.83 o
   1  51   1        0.23        2.22        1.77 o
   2  51   1        2.32        0.78        7.26 o
   3  51   1       20.83       19.27       29.36 o
  -3  52   1       26.66       24.07       15.45 o
  -2  52   1       22.69       25.29       20.20 o
  -1  52   1       11.99       11.83       19.47 o
   0  52   1       -3.66        3.12        5.99 o
   1  52   1       10.27       15.74       16.02 o
   2  52   1        3.67        1.08       10.36 o
   3  52   1       41.41       43.80       12.03 o
  -3  53   1       23.40        7.59       24.87 o
  -2  53   1       16.99       27.39       27.62 o
  -1  53   1       -1.65        3.01        5.19 o
   0  53   1       -5.38        2.17        7.78 o
   1  53   1       -3.31        0.23        6.78 o
   2  53   1       52.35       48.41       12.21 o
   3  53   1       -0.65        0.22        2.27 o
  -3  54   1       -2.89        9.71        6.76 o
  -2  54   1        0.10        0.07        2.35 o
  -1  54   1       -0.07        0.01        2.32 o
   0  54   1        9.53        0.58       13.97 o
   1  54   1        5.06        3.05        7.56 o
   2  54   1       32.03       19.09       26.65 o
   3  54   1       21.53       11.68       24.15 o
  -2  55   1       17.93        8.08       25.94 o
  -1  55   1        2.67        2.22       10.43 o
   0  55   1        1.00        3.71        4.26 o
   1  55   1        6.51        0.69       12.22 o
   2  55   1       32.19       21.06       30.02 o
  -2  56   1      143.80      114.83       18.84 o
  -1  56   1       -0.38        0.37        2.18 o
   0  56   1       -0.93        0.32        2.55 o
   1  56   1       -2.77        2.23        6.99 o
   2  56   1       61.65       51.33       11.75 o
  -2  57   1       11.47       11.85       21.98 o
  -1  57   1        7.73        7.48       15.32 o
   0  57   1       -2.51        4.11        7.61 o
   1  57   1       -0.74        0.38        2.12 o
   2  57   1        9.98       16.59       19.51 o
  -1  58   1       19.22        1.70       29.91 o
   0  58   1       -9.46        0.14       12.40 o
   1  58   1       -1.62        0.14        4.80 o
  -1  59   1       32.39       18.04       33.75 o
   0  59   1        5.45        1.09       10.26 o
   1  59   1        2.73        1.82        6.70 o
   0  60   1        4.11        1.36       11.49 o
  -6   0   2       26.73        1.21       57.20 o
  -5   0   2       25.56       23.43       13.77 o
  -4   0   2       75.09       87.67       14.58 o
  -3   0   2       -1.19        0.13        3.14 o
  -2   0   2      116.70      120.75        8.80 o
  -1   0   2      266.02      256.57       10.24 o
   0   0   2    27365.12    28896.08      476.96 o
   1   0   2       17.86       16.61        2.87 o
   2   0   2       26.83       26.30        4.53 o
   3   0   2       -7.50        2.93        7.82 o
   4   0   2       20.23       22.94        9.77 o
   5   0   2       63.84       40.21       17.38 o
   6   0   2       -1.63        0.95        5.86 o
  -6   1   2       21.20       10.26       20.26 o
  -5   1   2       68.36       64.82       10.67 o
  -4   1   2      293.18      287.87       14.66 o
  -3   1   2       28.83       19.08       16.01 o
  -2   1   2        9.61       10.36        1.74 o
  -1   1   2        4.44        5.68        4.11 o
   0   1   2    23046.72    24559.06      284.46 o
   1   1   2      101.07      127.91        5.34 o
   2   1   2      334.11      347.08        8.34 o
   3   1   2        0.07        0.04        0.85 o
   4   1   2       95.45      101.31        7.63 o
   5   1   2       27.28       27.80       10.46 o
   6   1   2       34.39       25.89       17.61 o
  -6   2   2      175.77      178.98       15.75 o
  -5   2   2        0.56        0.80        2.03 o
  -4   2   2       13.28       14.05        3.49 o
  -3   2   2       18.29       16.72        9.59 o
  -2   2   2      821.99      846.03       14.70 o
  -1   2   2        0.62        0.84        0.85 o
   0   2   2      262.41      284.22        6.32 o
   1   2   2       84.05       81.36        5.12 o
   2   2   2       12.83       12.48        1.86 o
   3   2   2       59.77       52.19        6.27 o
   4   2   2     1040.01     1039.96       20.93 o
   5   2   2       28.53       21.31       17.71 o
   6   2   2      167.03      153.63       26.79 o
  -6   3   2      271.69      256.15       19.31 o
  -5   3   2       10.36        9.91       11.08 o
  -4   3   2      959.71      989.63       25.78 o
  -3   3   2       36.13       35.11        7.08 o
  -2   3   2       38.52       43.28        3.30 o
  -1   3   2      408.06      410.13        8.50 o
   0   3   2     2457.37     2669.97       32.65 o
   1   3   2        0.00        0.00        0.26 o
   2   3   2      617.26      643.29       11.62 o
   3   3   2       17.22       22.25        9.51 o
   4   3   2       72.96       70.88        5.65 o
   5   3   2        0.00        0.00        2.25 o
   6   3   2       57.83       44.19       16.79 o
  -6   4   2       10.29        9.87        5.29 o
  -5   4   2        0.80        0.34        1.88 o
  -4   4   2      841.82      862.81       23.21 o
  -3   4   2        4.94        9.54        5.07 o
  -2   4   2      131.47      140.57        6.16 o
  -1   4   2       44.31       53.80        2.92 o
   0   4   2      151.79      164.81        5.09 o
   1   4   2      767.53      802.83       13.22 o
   2   4   2       49.72       50.23        4.11 o
   3   4   2        6.02        9.23        4.81 o
   4   4   2      341.63      332.16       10.95 o
   5   4   2       28.66       16.79       27.56 o
   6   4   2      413.48      391.99       28.37 o
  -6   5   2      280.73      272.75       21.62 o
  -5   5   2       14.09       17.67       15.47 o
  -4   5   2      141.22      140.28       10.35 o
  -3   5   2        5.28        3.74        4.58 o
  -2   5   2        0.50        0.53        1.15 o
  -1   5   2      644.17      687.30       11.80 o
   0   5   2      612.76      616.85       10.44 o
   1   5   2     1370.94     1380.05       20.88 o
   2   5   2      127.63      141.61        6.20 o
   3   5   2       19.84       19.20       10.75 o
   4   5   2      790.90      816.30       16.74 o
   5   5   2        0.00        0.00        1.74 o
   6   5   2      455.09      455.45       31.56 o
  -6   6   2      454.55      420.27       27.53 o
  -5   6   2        0.01        0.03        2.23 o
  -4   6   2       57.78       53.69        6.91 o
  -3   6   2       29.21       28.33        8.80 o
  -2   6   2     1033.07      996.88       16.40 o
  -1   6   2     1964.29     1989.36       25.26 o
   0   6   2       92.27       90.38        4.44 o
   1   6   2       13.39       13.85        1.68 o
   2   6   2       90.88       91.89        4.51 o
   3   6   2       32.71       32.88        6.48 o
   4   6   2      189.45      200.97       10.38 o
   5   6   2        9.53       17.40       11.88 o
   6   6   2        4.26        5.53        5.94 o
  -6   7   2       34.54       53.23       12.53 o
  -5   7   2       16.82       14.88       13.67 o
  -4   7   2       72.08       54.22        8.55 o
  -3   7   2      457.84      439.82       13.28 o
  -2   7   2      246.74      259.92        8.49 o
  -1   7   2       10.16       10.61        1.50 o
   0   7   2      238.33      245.83        6.17 o
   1   7   2      878.13      914.79       13.25 o
   2   7   2     2450.78     2415.13       31.97 o
   3   7   2        0.19        0.18        0.33 o
   4   7   2       16.46       17.65       12.97 o
   5   7   2       -0.09        1.78        2.12 o
   6   7   2      133.94      111.03       30.32 o
  -6   8   2       12.26       12.95       18.41 o
  -5   8   2        4.68        0.17        5.85 o
  -4   8   2       60.91       48.41        9.77 o
  -3   8   2      469.17      499.47       13.09 o
  -2   8   2     1288.66     1184.45       21.67 o
  -1   8   2      191.98      188.82        7.17 o
   0   8   2       79.98       78.52        4.32 o
   1   8   2       70.50       67.49        4.02 o
   2   8   2      713.74      620.68       13.71 o
   3   8   2      810.92      830.05       15.42 o
   4   8   2        3.18        2.65        6.75 o
   5   8   2        4.42        0.35        8.08 o
   6   8   2       87.27       96.50       27.70 o
  -6   9   2       23.52       27.14       29.66 o
  -5   9   2       16.13        4.07       14.35 o
  -4   9   2       -6.45        1.48        7.90 o
  -3   9   2       37.49       41.06        4.47 o
  -2   9   2     2051.58     1876.10       30.03 o
  -1   9   2       28.17       20.10        3.36 o
   0   9   2       62.74       51.29        4.13 o
   1   9   2       72.67       79.56        4.61 o
   2   9   2        5.34        5.01        1.09 o
   3   9   2      549.99      578.39       12.14 o
   4   9   2       -1.07        0.87        2.83 o
   5   9   2        0.12        1.31        1.78 o
   6   9   2        3.03        1.46       18.15 o
  -6  10   2        4.92        0.19       13.53 o
  -5  10   2       -0.34        0.76        1.83 o
  -4  10   2        2.87        1.87        4.41 o
  -3  10   2      470.74      517.30       13.28 o
  -2  10   2       96.10       90.82        5.20 o
  -1  10   2      466.92      510.33        9.25 o
   0  10   2       27.66       25.02        7.90 o
   1  10   2       68.72       67.25        3.70 o
   2  10   2      994.03      935.50       15.97 o
   3  10   2      128.11      133.38        6.24 o
   4  10   2        6.22        1.33        6.65 o
   5  10   2       16.36       12.73       13.44 o
   6  10   2       -8.26        0.43       19.69 o
  -6  11   2       -9.73        1.59       10.87 o
  -5  11   2        7.96        7.09       12.70 o
  -4  11   2        0.16        0.21        1.63 o
  -3  11   2      769.65      805.05       17.21 o
  -2  11   2      153.91      179.87        9.98 o
  -1  11   2        0.59        0.60        0.23 o
   0  11   2       47.34       54.24        3.93 o
   1  11   2      680.35      686.34       11.44 o
   2  11   2      112.78      130.97        5.76 o
   3  11   2      678.45      718.22       14.01 o
   4  11   2        2.69        9.52        4.38 o
   5  11   2        3.42        1.18        5.48 o
   6  11   2        0.17        1.00        2.94 o
  -6  12   2       -1.45        2.72        5.42 o
  -5  12   2        0.01        0.00        2.25 o
  -4  12   2       44.89       42.94       10.11 o
  -3  12   2      403.09      404.84       12.33 o
  -2  12   2       17.80       15.01        2.42 o
  -1  12   2      220.08      231.75        6.70 o
   0  12   2       37.34       42.81        4.40 o
   1  12   2        3.40        3.40        1.01 o
   2  12   2     1577.03     1598.57       22.35 o
   3  12   2       45.97       45.34        4.27 o
   4  12   2        0.38        0.21        1.65 o
   5  12   2        2.08        2.66        4.47 o
   6  12   2        8.63       10.44       16.38 o
  -6  13   2       16.25       14.00       15.34 o
  -5  13   2        7.87        3.81       11.13 o
  -4  13   2        0.41        1.25        1.64 o
  -3  13   2      178.38      171.29        8.84 o
  -2  13   2     1269.79     1095.12       21.28 o
  -1  13   2        9.44        6.25        5.22 o
   0  13   2       -2.08        0.44        1.48 o
   1  13   2       12.01       11.71        5.46 o
   2  13   2      102.40      105.62        4.94 o
   3  13   2      284.16      306.75       10.19 o
   4  13   2        8.56       11.98       10.28 o
   5  13   2       13.46        2.84       18.51 o
   6  13   2       -0.02        0.03        2.59 o
  -6  14   2        4.94        0.28       10.41 o
  -5  14   2        3.08        1.30        7.81 o
  -4  14   2       -2.13        0.47        3.50 o
  -3  14   2      188.30      204.06        9.51 o
  -2  14   2      972.51      901.49       17.90 o
  -1  14   2      258.67      265.69        8.06 o
   0  14   2       -0.65        0.73        0.56 o
   1  14   2      152.01      131.81        5.60 o
   2  14   2      282.24      296.27        8.31 o
   3  14   2      700.32      740.85       15.37 o
   4  14   2        7.41        5.11        9.67 o
   5  14   2       -2.10       10.67        6.48 o
   6  14   2        4.05        1.84        7.88 o
  -6  15   2        4.97        1.71       10.71 o
  -5  15   2       42.29       34.09       15.74 o
  -4  15   2        8.54        8.08       10.64 o
  -3  15   2      286.73      286.59       11.19 o
  -2  15   2       95.56       79.40        5.53 o
  -1  15   2        7.65        7.32        1.25 o
   0  15   2       34.44       38.24        4.94 o
   1  15   2     1586.25     1552.30       21.84 o
   2  15   2      599.92      573.13       12.34 o
   3  15   2       97.27      113.24        7.08 o
   4  15   2        1.66        1.59        4.66 o
   5  15   2        3.08        1.88        6.38 o
   6  15   2       -0.02        0.00        2.91 o
  -6  16   2      -14.11        0.62       16.00 o
  -5  16   2        9.23        3.58       13.47 o
  -4  16   2       41.65       28.12       13.09 o
  -3  16   2      277.20      281.63       11.22 o
  -2  16   2       36.94       38.54        6.36 o
  -1  16   2     2539.71     2530.33       32.56 o
   0  16   2       11.47       18.55        6.19 o
   1  16   2       59.49       58.55        3.61 o
   2  16   2       53.95       40.39        4.90 o
   3  16   2        4.14        4.22        1.71 o
   4  16   2        5.10        4.87        7.35 o
   5  16   2        8.07       18.01       10.41 o
   6  16   2        3.44        0.55       10.59 o
  -6  17   2       -6.08        0.41       14.03 o
  -5  17   2        5.84        4.67       12.60 o
  -4  17   2        2.66        1.04        2.89 o
  -3  17   2       14.28       10.72        4.62 o
  -2  17   2        4.08       10.78        2.66 o
  -1  17   2     2884.53     2823.02       37.62 o
   0  17   2       -2.90        0.39        1.62 o
   1  17   2     1093.68     1038.18       19.36 o
   2  17   2        0.64        1.60        0.77 o
   3  17   2      109.34      110.71        7.98 o
   4  17   2       82.16       62.82       10.68 o
   5  17   2       -1.91        0.64        5.07 o
   6  17   2       17.80        0.13       27.10 o
  -6  18   2      -16.22        0.65       14.07 o
  -5  18   2        0.01        0.23        2.61 o
  -4  18   2       51.70       39.88       13.84 o
  -3  18   2       -5.62        1.07        5.64 o
  -2  18   2        6.34        3.59        4.63 o
  -1  18   2      596.45      557.44       13.76 o
   0  18   2        5.70        4.76        3.38 o
   1  18   2     3797.41     3583.46       47.21 o
   2  18   2        0.43        3.74        0.61 o
   3  18   2       -5.91        0.68        4.28 o
   4  18   2       14.70       15.94       15.43 o
   5  18   2       26.32       31.52       26.63 o
   6  18   2       11.21        0.48       14.66 o
  -6  19   2        3.05        0.36        7.70 o
  -5  19   2      129.13      134.95       15.96 o
  -4  19   2       14.72        5.81       12.85 o
  -3  19   2        0.05        0.03        1.76 o
  -2  19   2       -0.23        0.86        0.79 o
  -1  19   2      517.51      519.53       10.97 o
   0  19   2       58.24       56.42        5.36 o
   1  19   2     1035.93      943.71       16.97 o
   2  19   2        1.88        1.07        1.59 o
   3  19   2       -4.76        0.29        5.45 o
   4  19   2        0.59        2.11        1.59 o
   5  19   2       18.96       16.79        7.67 o
   6  19   2       27.90        9.51       35.69 o
  -6  20   2        7.18       13.52       14.89 o
  -5  20   2      161.37      147.57       13.79 o
  -4  20   2       -1.08        0.34        3.77 o
  -3  20   2       14.63       16.91       11.40 o
  -2  20   2        5.04        1.71        4.45 o
  -1  20   2      605.02      568.63       11.91 o
   0  20   2       54.67       41.94        5.17 o
   1  20   2       34.62       31.56        3.10 o
   2  20   2        5.18        1.37        3.99 o
   3  20   2        2.41        5.37        4.74 o
   4  20   2       -6.94        0.27        8.93 o
   5  20   2      363.54      311.69       21.77 o
   6  20   2        1.67        0.97        7.63 o
  -6  21   2      -10.20        0.32       13.16 o
  -5  21   2       48.81       74.39       14.39 o
  -4  21   2        0.00        0.50        1.26 o
  -3  21   2        5.80        7.04        6.14 o
  -2  21   2       -0.50        0.15        0.96 o
  -1  21   2      463.09      447.20       10.38 o
   0  21   2     1447.81     1310.75       23.78 o
   1  21   2      176.31      159.60        6.76 o
   2  21   2       -0.36        3.62        0.88 o
   3  21   2       43.35       38.37        8.06 o
   4  21   2        4.28        0.33        6.40 o
   5  21   2       23.61       16.29       12.63 o
   6  21   2        4.46        0.78       12.82 o
  -6  22   2       -7.93        0.58       16.93 o
  -5  22   2       28.10       25.98       11.50 o
  -4  22   2        3.72        4.37        5.54 o
  -3  22   2        3.94        5.68        5.74 o
  -2  22   2       -0.33        0.17        0.91 o
  -1  22   2        0.21        0.69        0.92 o
   0  22   2     1868.84     1717.57       27.83 o
   1  22   2       32.44       32.30       13.17 o
   2  22   2       -2.15        0.26        3.16 o
   3  22   2        4.14        9.86        6.56 o
   4  22   2        0.88        0.15        2.08 o
   5  22   2       79.00       65.46       13.55 o
   6  22   2      -11.26        0.21       22.78 o
  -5  23   2      336.46      309.33       18.84 o
  -4  23   2       21.30       24.28       21.98 o
  -3  23   2        3.11        4.41        5.74 o
  -2  23   2        9.46        3.53        7.55 o
  -1  23   2       41.59       41.77        4.87 o
   0  23   2     1050.15      998.48       17.98 o
   1  23   2       24.96       24.91       10.40 o
   2  23   2        4.06        3.75        4.32 o
   3  23   2       -1.04        0.43        2.22 o
   4  23   2        0.46        6.06        1.23 o
   5  23   2       76.15       86.38       11.94 o
  -5  24   2      189.60      185.08       14.48 o
  -4  24   2        8.46        5.54        4.71 o
  -3  24   2        0.50        0.43        1.29 o
  -2  24   2       32.90       29.36       21.15 o
  -1  24   2       51.13       48.35        5.27 o
   0  24   2       65.54       69.49        5.52 o
   1  24   2       67.64       52.47        5.84 o
   2  24   2        6.19        9.84        7.07 o
   3  24   2        6.38       11.07        7.83 o
   4  24   2       95.20      115.58       12.08 o
   5  24   2      540.00      474.30       24.80 o
  -5  25   2      105.78      137.99       13.29 o
  -4  25   2       81.66       94.07       11.46 o
  -3  25   2       25.17       16.63       23.59 o
  -2  25   2       12.01       13.73       11.33 o
  -1  25   2      743.10      742.48       14.10 o
   0  25   2      832.88      877.88       15.63 o
   1  25   2        1.32        1.18        0.69 o
   2  25   2       25.80       23.15       13.70 o
   3  25   2        3.80        6.36        4.42 o
   4  25   2       63.19       71.26       10.00 o
   5  25   2        2.54        2.18        3.08 o
  -5  26   2        5.22        1.85        8.36 o
  -4  26   2      295.27      331.07       17.17 o
  -3  26   2        2.87       10.42        4.07 o
  -2  26   2       -4.24        0.08        5.77 o
  -1  26   2       30.68       30.87        3.03 o
   0  26   2      122.05      114.54        6.85 o
   1  26   2     1068.89     1041.91       18.37 o
   2  26   2        4.23        0.55        4.04 o
   3  26   2       21.11       22.42       16.68 o
   4  26   2        4.13        4.83        2.68 o
   5  26   2        3.72       10.81        9.91 o
  -5  27   2       15.95        5.14       19.00 o
  -4  27   2      218.32      232.22       15.22 o
  -3  27   2       11.56        7.15       14.10 o
  -2  27   2        4.04        1.85        5.77 o
  -1  27   2      385.30      389.67       10.39 o
   0  27   2       17.24       15.23       10.54 o
   1  27   2      715.98      715.71       14.70 o
   2  27   2        9.60        3.92        6.18 o
   3  27   2       -3.75        1.71        5.64 o
   4  27   2      263.47      287.19       18.40 o
   5  27   2       -1.56        8.34        4.14 o
  -5  28   2        1.17        0.30        3.58 o
  -4  28   2        0.29        0.29        0.81 o
  -3  28   2       -0.40        1.10        1.49 o
  -2  28   2      197.07      199.02       11.40 o
  -1  28   2      766.24      800.69       14.95 o
   0  28   2       -1.18        0.19        2.54 o
   1  28   2       27.70       24.01        3.19 o
   2  28   2       34.91       35.32        6.01 o
   3  28   2       35.42       45.50       21.95 o
   4  28   2      214.81      272.48       18.13 o
   5  28   2       11.78       17.75       17.07 o
  -5  29   2       16.12       13.96       18.12 o
  -4  29   2       71.85       74.83       11.03 o
  -3  29   2      123.49      100.02       12.30 o
  -2  29   2       25.10       27.49        4.17 o
  -1  29   2       53.10       52.21        5.59 o
   0  29   2      147.42      155.60        7.65 o
   1  29   2      286.13      281.17       10.83 o
   2  29   2      562.14      596.84       16.91 o
   3  29   2        7.03        9.18       10.13 o
   4  29   2       43.53       50.19       12.88 o
   5  29   2        2.37        3.09        7.04 o
  -5  30   2       -0.02        0.02        1.60 o
  -4  30   2       49.47       52.21       12.74 o
  -3  30   2      124.54      119.90       12.10 o
  -2  30   2      196.79      200.15       10.70 o
  -1  30   2       44.16       48.86        7.99 o
   0  30   2       92.85       94.92        6.83 o
   1  30   2       24.58       33.68       15.77 o
   2  30   2      361.86      381.14       14.22 o
   3  30   2      105.16      100.09       10.18 o
   4  30   2       -0.44        8.29        2.97 o
   5  30   2       27.63       16.92       31.77 o
  -5  31   2        4.66        4.27       10.98 o
  -4  31   2       -6.18        0.75        9.78 o
  -3  31   2        9.97        9.22        5.58 o
  -2  31   2      997.20     1109.10       22.91 o
  -1  31   2        8.32        2.10        8.92 o
   0  31   2        8.78        9.34        6.69 o
   1  31   2        5.01        2.55        5.44 o
   2  31   2       87.18       93.82        6.93 o
   3  31   2      170.59      151.53       12.19 o
   4  31   2        4.51        0.69        6.77 o
   5  31   2        7.75        4.96       14.25 o
  -5  32   2        0.19        2.31        2.12 o
  -4  32   2       -2.65        2.80        6.05 o
  -3  32   2      139.09      129.27       13.38 o
  -2  32   2       70.20       64.47        7.53 o
  -1  32   2       22.62       22.57       15.63 o
   0  32   2       11.00        0.86        7.60 o
   1  32   2        3.02        1.94        6.36 o
   2  32   2      258.28      281.76       12.95 o
   3  32   2        2.53        2.34        2.28 o
   4  32   2       -1.85        3.31        3.98 o
   5  32   2       -9.35        1.18       14.12 o
  -5  33   2        9.90        8.63       12.75 o
  -4  33   2        5.28        8.49       10.94 o
  -3  33   2       10.54       15.57       10.93 o
  -2  33   2      332.69      368.11       16.39 o
  -1  33   2        0.00        0.00        1.44 o
   0  33   2       63.32       61.50        6.68 o
   1  33   2       69.00       69.08        9.03 o
   2  33   2       41.18       41.02        6.16 o
   3  33   2       51.88       47.60       11.39 o
   4  33   2       20.95       20.50       22.13 o
   5  33   2        4.05        1.44        8.62 o
  -5  34   2        0.97        0.36        2.75 o
  -4  34   2       59.54       65.56       13.26 o
  -3  34   2       36.24       39.08       12.51 o
  -2  34   2      299.87      348.53       14.17 o
  -1  34   2       67.85       55.93        7.83 o
   0  34   2       87.04       83.40        7.27 o
   1  34   2       10.06        9.69       10.13 o
   2  34   2     2306.44     2367.33       40.95 o
   3  34   2        3.21        2.83        5.83 o
   4  34   2       13.44       20.76       11.92 o
   5  34   2       13.02        7.35       19.68 o
  -5  35   2       -2.49        2.25        7.03 o
  -4  35   2       -1.39        0.86        4.40 o
  -3  35   2       22.14       24.00       20.47 o
  -2  35   2     1185.28     1307.18       29.24 o
  -1  35   2        1.49        0.66        3.63 o
   0  35   2       46.81       41.34        7.52 o
   1  35   2       27.79       32.48       17.62 o
   2  35   2      485.19      464.45       16.60 o
   3  35   2       16.46       24.84       21.35 o
   4  35   2       16.14        7.57       20.68 o
   5  35   2        1.34        0.37        6.88 o
  -5  36   2       -5.89        1.34       10.18 o
  -4  36   2        2.67        1.72        6.75 o
  -3  36   2        5.03        5.30        8.37 o
  -2  36   2     1551.98     1755.49       34.66 o
  -1  36   2        2.52        5.09        5.01 o
   0  36   2        4.05        0.17        5.02 o
   1  36   2        8.98        2.51        9.33 o
   2  36   2      185.40      187.99       10.38 o
   3  36   2       62.49       54.00       12.82 o
   4  36   2        0.54        2.53        1.62 o
   5  36   2        0.17        0.09        3.47 o
  -5  37   2       -6.42        0.48       11.62 o
  -4  37   2       30.03       19.10       11.61 o
  -3  37   2       35.63       22.04       12.11 o
  -2  37   2      424.69      456.62       17.26 o
  -1  37   2       -0.23        0.14        1.42 o
   0  37   2       32.93       21.55        8.28 o
   1  37   2        3.59        6.01        4.45 o
   2  37   2     1346.02     1363.43       28.96 o
   3  37   2        5.35        3.93        6.65 o
   4  37   2       24.11       24.10       30.48 o
   5  37   2       17.87        2.42       23.41 o
  -4  38   2      263.51      283.97       17.83 o
  -3  38   2        1.14        8.11        3.41 o
  -2  38   2      123.38      120.51       11.79 o
  -1  38   2        1.26        1.29        2.91 o
   0  38   2       96.46       85.02        9.27 o
   1  38   2       -2.87        0.99        3.91 o
   2  38   2      199.09      190.49       13.82 o
   3  38   2        2.47        8.18        5.52 o
   4  38   2        2.39        2.72        2.63 o
  -4  39   2        5.61        5.76        3.04 o
  -3  39   2       11.98        4.52       13.31 o
  -2  39   2        3.35        5.91        5.71 o
  -1  39   2       25.67       30.43       21.00 o
   0  39   2      118.51      113.62       10.73 o
   1  39   2        1.62        1.28        3.31 o
   2  39   2       -0.17        0.34        2.08 o
   3  39   2        0.36        0.65        1.78 o
   4  39   2      513.33      520.76       24.59 o
  -4  40   2      261.56      301.48       17.08 o
  -3  40   2       11.83        3.14       10.02 o
  -2  40   2       19.33       15.68       20.50 o
  -1  40   2      123.74      102.22       10.46 o
   0  40   2       12.33        0.10       16.09 o
   1  40   2       84.24       86.74        9.56 o
   2  40   2       11.71        5.51       12.95 o
   3  40   2        3.70        2.01        7.03 o
   4  40   2      488.58      493.79       23.76 o
  -4  41   2      676.60      672.12       25.96 o
  -3  41   2       11.91        6.55       11.31 o
  -2  41   2        9.44        7.05        5.06 o
  -1  41   2        4.85        6.06        7.14 o
   0  41   2       13.53        0.11       14.66 o
   1  41   2       98.01       87.11       11.55 o
   2  41   2      120.13      100.44       12.42 o
   3  41   2        2.24        2.77        5.30 o
   4  41   2        7.89        9.07        3.78 o
  -4  42   2       16.35       22.75        7.24 o
  -3  42   2       17.39        8.83       18.32 o
  -2  42   2       64.30       55.93       11.00 o
  -1  42   2       33.02       31.70       10.34 o
   0  42   2      211.45      197.19       13.49 o
   1  42   2       28.93       22.38       12.01 o
   2  42   2        3.00        3.17        7.69 o
   3  42   2       21.71       23.32       20.20 o
   4  42   2      329.60      319.02       22.22 o
  -4  43   2       22.93       41.00       28.38 o
  -3  43   2      -13.56        2.13       17.76 o
  -2  43   2        4.69        1.21        9.65 o
  -1  43   2       63.08       43.15       11.64 o
   0  43   2     1148.40     1275.50       28.73 o
   1  43   2       45.29       37.41       11.48 o
   2  43   2       -6.38        2.37        9.23 o
   3  43   2        8.22        1.80       14.31 o
   4  43   2       69.09       76.22       13.79 o
  -4  44   2       33.65       43.27       28.21 o
  -3  44   2       -0.75        0.11        1.48 o
  -2  44   2       -2.35        0.50        5.33 o
  -1  44   2       14.66        7.63       18.54 o
   0  44   2      482.92      517.21       17.97 o
   1  44   2        0.60        2.84        1.79 o
   2  44   2      -10.64        1.52       12.27 o
   3  44   2       -3.02        1.79        6.18 o
   4  44   2        1.59        1.17        8.74 o
  -4  45   2       26.45       20.01       24.26 o
  -3  45   2       17.12        5.57       21.45 o
  -2  45   2        0.01        0.03        1.49 o
  -1  45   2        4.34        1.26       10.64 o
   0  45   2       92.31       96.01       10.79 o
   1  45   2      -13.03        1.10       10.25 o
   2  45   2       37.20       20.05       11.09 o
   3  45   2       -1.52        0.45        4.62 o
   4  45   2        6.27       14.70       16.07 o
  -4  46   2       15.21       12.91        9.79 o
  -3  46   2        0.61        2.70        2.00 o
  -2  46   2       25.27       25.36       27.06 o
  -1  46   2       14.51        5.81        8.77 o
   0  46   2       41.40       34.31       12.76 o
   1  46   2       28.41       40.19       22.48 o
   2  46   2        0.16        0.07        2.32 o
   3  46   2       12.52       11.55       20.59 o
   4  46   2      122.02       85.64       16.81 o
  -3  47   2      -12.26        6.82       11.25 o
  -2  47   2       -0.01        0.06        2.34 o
  -1  47   2      191.70      162.71       18.92 o
   0  47   2      139.38      158.11       12.36 o
   1  47   2       16.34       11.05        5.21 o
   2  47   2       12.11        6.93       14.72 o
   3  47   2        0.19        2.05        1.72 o
  -3  48   2        2.73        2.40        4.97 o
  -2  48   2       15.91        0.62       21.78 o
  -1  48   2       19.89       18.76        8.64 o
   0  48   2       31.30       19.85        8.79 o
   1  48   2      154.18      120.86       13.64 o
   2  48   2        3.32        0.16        7.79 o
   3  48   2       -5.24        1.27       10.25 o
  -3  49   2        1.54        2.80        3.71 o
  -2  49   2        0.05        0.00        2.46 o
  -1  49   2       40.77       49.84       10.89 o
   0  49   2      -10.18        1.04       13.18 o
   1  49   2      241.83      210.68       16.19 o
   2  49   2        0.65        1.42        1.96 o
   3  49   2       21.50        4.91       25.59 o
  -3  50   2        0.03        0.02        2.86 o
  -2  50   2       -1.61        9.41        4.94 o
  -1  50   2      263.62      229.89       22.04 o
   0  50   2       12.83        2.75       18.31 o
   1  50   2       58.95       61.70        9.37 o
   2  50   2        0.72        0.30        2.16 o
   3  50   2       20.71       22.05       31.40 o
  -3  51   2      107.60       87.36       14.33 o
  -2  51   2        2.51        1.42        6.99 o
  -1  51   2       71.28       56.78       14.66 o
   0  51   2       19.42        8.18       29.12 o
   1  51   2       36.43       22.52        8.84 o
   2  51   2       -4.32        4.17        8.69 o
   3  51   2        2.80        7.18        8.69 o
  -3  52   2      185.70      155.16       19.17 o
  -2  52   2       -0.25        0.07        3.12 o
  -1  52   2        0.13        0.08        2.87 o
   0  52   2      -10.75        0.94        7.65 o
   1  52   2        9.38       14.01       11.63 o
   2  52   2       10.20       17.07       12.82 o
   3  52   2       82.86       74.49       15.36 o
  -2  53   2       -0.77       16.69        2.30 o
  -1  53   2        5.97        4.63       10.31 o
   0  53   2       -6.59        1.32       12.15 o
   1  53   2       14.46        5.90       15.14 o
   2  53   2        4.75       18.36        8.27 o
  -2  54   2       12.68       17.21       12.91 o
  -1  54   2        0.75        3.79        2.07 o
   0  54   2       12.14        0.35       16.73 o
   1  54   2        4.45        1.77       10.77 o
   2  54   2        0.23        0.43        1.92 o
  -2  55   2        7.07        7.53       12.12 o
  -1  55   2       -0.35        0.16        2.19 o
   0  55   2        5.45        3.69       12.00 o
   1  55   2       27.21       11.21       21.31 o
   2  55   2        0.65        6.55        2.00 o
  -2  56   2        5.28        3.33        8.46 o
  -1  56   2       -4.56        0.55        8.65 o
   0  56   2      -11.85        0.00       21.39 o
   1  56   2       -9.93        1.74       10.42 o
   2  56   2       26.34       18.39       33.72 o
  -1  57   2        2.48        0.83        9.95 o
   0  57   2        0.19        1.25        1.93 o
   1  57   2        4.25        2.08        9.51 o
  -1  58   2      -16.59        1.10       26.79 o
   0  58   2       -4.01        2.21       11.25 o
   1  58   2        8.06        1.18       20.01 o
   0  59   2       -6.40        0.43       13.20 o
  -6   1   3       11.30        1.32       17.51 o
  -5   1   3      520.35      577.44       19.64 o
  -4   1   3        3.96        0.33        5.43 o
  -3   1   3        6.93        7.94        6.73 o
  -2   1   3        0.05        0.04        1.00 o
  -1   1   3       67.34       78.18        4.59 o
   0   1   3       -2.29        0.95        1.49 o
   1   1   3      212.19      204.69        7.37 o
   2   1   3       -1.44        1.63        1.61 o
   3   1   3       13.34        9.26       13.05 o
   4   1   3        3.93        0.24        8.02 o
   5   1   3      741.04      704.84       27.10 o
   6   1   3        2.34        0.06       10.11 o
  -6   2   3        0.09        0.24        2.40 o
  -5   2   3      169.61      171.34       14.50 o
  -4   2   3       19.92       29.95       16.18 o
  -3   2   3        2.59        3.72        5.02 o
  -2   2   3       15.41       15.77        8.60 o
  -1   2   3      131.83      132.66        5.71 o
   0   2   3       10.82       11.46        5.05 o
   1   2   3      307.06      286.70        8.58 o
   2   2   3       18.79       19.66        9.79 o
   3   2   3       14.93        4.22       12.86 o
   4   2   3       29.94       27.54       11.13 o
   5   2   3       12.27        8.43        5.47 o
   6   2   3       -1.52        5.30        5.67 o
  -6   3   3       -0.53        6.90        3.07 o
  -5   3   3      269.65      265.04       15.83 o
  -4   3   3       77.35       65.71       10.26 o
  -3   3   3       32.90       40.26        8.98 o
  -2   3   3        0.19        0.81        1.05 o
  -1   3   3     1540.21     1536.14       25.12 o
   0   3   3       -2.97        0.88        1.86 o
   1   3   3     1979.75     1892.12       29.98 o
   2   3   3        6.67        3.51        4.23 o
   3   3   3       36.30       38.98        8.80 o
   4   3   3       49.69       48.03        8.37 o
   5   3   3      403.35      372.87       20.59 o
   6   3   3       11.39        4.83       17.44 o
  -6   4   3       -5.61       16.10        9.54 o
  -5   4   3       68.77       60.46       10.41 o
  -4   4   3       57.57       57.52        8.92 o
  -3   4   3        7.58        2.30        7.41 o
  -2   4   3       10.64       11.21        6.71 o
  -1   4   3     2040.24     1957.25       28.44 o
   0   4   3       45.01       43.46        4.54 o
   1   4   3     1195.29     1143.49       21.04 o
   2   4   3       31.71       24.35       13.53 o
   3   4   3        2.16        3.50        3.72 o
   4   4   3      129.65      110.23       12.20 o
   5   4   3       17.72       17.87       17.56 o
   6   4   3        8.97       17.82       21.32 o
  -6   5   3       -4.67        1.92       11.50 o
  -5   5   3       -0.34        0.10        1.63 o
  -4   5   3       36.02       27.95       13.52 o
  -3   5   3       41.47       31.43        8.14 o
  -2   5   3        0.38        1.35        0.88 o
  -1   5   3      167.62      163.67        6.72 o
   0   5   3        4.67        2.07        2.63 o
   1   5   3       13.77       12.75        2.58 o
   2   5   3       16.40       15.50        9.98 o
   3   5   3       19.53       21.42       13.68 o
   4   5   3        4.47        2.48        6.11 o
   5   5   3       -1.29        4.14        4.12 o
   6   5   3       -5.18        0.19       15.20 o
  -6   6   3       -0.58        0.12        2.52 o
  -5   6   3       17.74       16.49       17.69 o
  -4   6   3      125.40      127.61       11.37 o
  -3   6   3      130.77      125.44        8.94 o
  -2   6   3      244.26      242.22        8.25 o
  -1   6   3      884.27      870.85       15.63 o
   0   6   3       97.32       93.03        4.90 o
   1   6   3     1427.97     1397.23       22.80 o
   2   6   3      292.80      308.37        9.27 o
   3   6   3       81.68       88.88        7.29 o
   4   6   3       89.65       85.78       10.48 o
   5   6   3       13.65        6.75       17.04 o
   6   6   3       -2.76        6.66       10.19 o
  -6   7   3       17.51       20.28       18.93 o
  -5   7   3       43.33       44.62       11.45 o
  -4   7   3       48.49       59.12        8.57 o
  -3   7   3      185.50      179.64        9.80 o
  -2   7   3      173.70      168.67        7.71 o
  -1   7   3      991.26      978.20       16.32 o
   0   7   3        4.44        5.44        2.62 o
   1   7   3      607.52      583.70       12.88 o
   2   7   3       71.37       77.60        5.69 o
   3   7   3      289.35      296.31       11.14 o
   4   7   3       90.22      100.90       11.11 o
   5   7   3       37.54       52.29       11.09 o
   6   7   3        8.85       25.79       20.25 o
  -6   8   3       10.69        8.83       14.33 o
  -5   8   3       17.00        7.23       16.69 o
  -4   8   3       -7.82        4.95        7.19 o
  -3   8   3       82.74       93.38        8.41 o
  -2   8   3       29.57       27.00        9.87 o
  -1   8   3        2.94        3.12        3.06 o
   0   8   3      171.36      174.52        6.19 o
   1   8   3       20.68       15.25       11.22 o
   2   8   3        4.56        6.04        4.06 o
   3   8   3        1.08        1.32        2.31 o
   4   8   3        2.12        0.46        5.69 o
   5   8   3        3.51        1.03        7.20 o
   6   8   3       -0.62        1.05        4.16 o
  -6   9   3       -7.57        1.58       16.28 o
  -5   9   3        3.16        0.22        9.55 o
  -4   9   3       -1.01        0.70        2.47 o
  -3   9   3      594.12      626.14       15.61 o
  -2   9   3      440.17      448.08       11.69 o
  -1   9   3       29.92       26.99       14.22 o
   0   9   3        3.30        3.53        2.73 o
   1   9   3       18.27       18.85       10.07 o
   2   9   3      821.21      831.21       16.38 o
   3   9   3      439.55      469.11       12.89 o
   4   9   3       16.89       10.00       12.89 o
   5   9   3       -6.24        1.39        8.52 o
   6   9   3        0.42        0.01        3.27 o
  -6  10   3       -2.83        2.57        8.35 o
  -5  10   3       10.36       10.31       14.38 o
  -4  10   3       14.84       17.10       16.51 o
  -3  10   3      405.92      390.29       13.04 o
  -2  10   3      712.16      757.92       15.10 o
  -1  10   3       27.44       26.08        5.04 o
   0  10   3       12.15       10.14        6.14 o
   1  10   3       71.13       74.29        4.97 o
   2  10   3      516.80      576.90       12.58 o
   3  10   3      546.81      534.85       14.50 o
   4  10   3        5.70        6.26        7.78 o
   5  10   3        2.74        3.49        5.21 o
   6  10   3        0.49        6.51        3.34 o
  -6  11   3        3.96        3.69       12.92 o
  -5  11   3        8.29        4.01       11.56 o
  -4  11   3       21.02       14.19       15.62 o
  -3  11   3        2.17        2.20        4.73 o
  -2  11   3      116.19      138.59        7.47 o
  -1  11   3      162.13      136.22        6.86 o
   0  11   3        8.99        4.47        4.80 o
   1  11   3      100.06       87.15        5.33 o
   2  11   3      124.40      131.69        6.54 o
   3  11   3       37.09       34.92       10.92 o
   4  11   3       -1.86       15.30        3.50 o
   5  11   3        6.20        7.96       10.96 o
   6  11   3        1.64        0.07        7.97 o
  -6  12   3        2.35        9.26        5.54 o
  -5  12   3       11.93        4.03       18.83 o
  -4  12   3       -0.74        0.61        1.29 o
  -3  12   3      151.26      128.34        9.39 o
  -2  12   3      941.99      973.28       18.49 o
  -1  12   3       17.42       23.68        9.71 o
   0  12   3      247.15      248.07        7.29 o
   1  12   3       34.56       36.66        5.66 o
   2  12   3      294.67      290.97        8.72 o
   3  12   3      212.53      190.36       11.24 o
   4  12   3       17.24       11.45       18.72 o
   5  12   3       -2.13        1.99        3.55 o
   6  12   3       16.70       10.84       21.55 o
  -6  13   3      -17.67        3.63       26.76 o
  -5  13   3        7.37        0.54       11.42 o
  -4  13   3       -0.87       10.59        1.12 o
  -3  13   3      209.13      163.39       10.66 o
  -2  13   3     2341.71     2401.16       37.73 o
  -1  13   3       -0.32        4.96        0.56 o
   0  13   3        2.37        1.62        2.47 o
   1  13   3        8.57       10.98        4.24 o
   2  13   3     2630.38     2618.64       40.45 o
   3  13   3      171.82      142.85       10.34 o
   4  13   3        1.28        7.77        4.89 o
   5  13   3        0.65        1.22        1.27 o
   6  13   3       12.58        2.60       28.88 o
  -6  14   3        2.43        1.39        9.82 o
  -5  14   3       -8.47        2.12       16.89 o
  -4  14   3       -0.58        5.70        1.33 o
  -3  14   3       71.35       39.17        7.84 o
  -2  14   3      134.89      119.93        7.57 o
  -1  14   3       -3.42        0.27        3.31 o
   0  14   3       -2.22        1.61        1.69 o
   1  14   3        0.90        0.28        0.52 o
   2  14   3      707.65      711.25       15.22 o
   3  14   3       20.90       15.52       15.65 o
   4  14   3       20.26        7.92       18.62 o
   5  14   3       -5.82        2.45       10.05 o
   6  14   3       19.24        2.85       26.87 o
  -6  15   3      142.80      136.36       18.40 o
  -5  15   3       -0.19        0.03        2.68 o
  -4  15   3        1.30        3.83        3.59 o
  -3  15   3       -0.17        0.03        0.90 o
  -2  15   3      890.79      886.03       18.00 o
  -1  15   3       85.57       83.80        5.63 o
   0  15   3        7.88        4.47        4.61 o
   1  15   3       80.26       86.55        5.43 o
   2  15   3      334.05      357.43       10.32 o
   3  15   3        7.99        3.38        6.71 o
   4  15   3       28.36       26.95       21.23 o
   5  15   3        2.06        0.95        5.00 o
   6  15   3       80.30       76.52       16.79 o
  -6  16   3      177.75      164.65       18.78 o
  -5  16   3       -0.61        0.01        1.74 o
  -4  16   3      226.25      231.59       13.16 o
  -3  16   3       24.73       14.23       18.02 o
  -2  16   3      597.44      631.65       14.62 o
  -1  16   3       32.87       36.09        6.86 o
   0  16   3      345.94      339.92        8.99 o
   1  16   3       39.31       41.16        6.02 o
   2  16   3      870.25      903.69       17.47 o
   3  16   3       37.24       23.71        8.35 o
   4  16   3      291.35      318.65       15.87 o
   5  16   3       17.34        0.75       21.08 o
  -5  17   3        8.14        1.67       15.05 o
  -4  17   3      378.33      398.86       15.63 o
  -3  17   3       21.10       12.95       14.05 o
  -2  17   3       31.00       31.49       20.39 o
  -1  17   3       16.38       24.03       11.03 o
   0  17   3        4.05        4.05        3.03 o
   1  17   3       18.10       27.50        9.92 o
   2  17   3        0.01        0.02        1.13 o
   3  17   3        4.22        1.37        6.92 o
   4  17   3      236.44      243.38       14.51 o
   5  17   3        2.59        1.49        9.94 o
  -5  18   3        4.61        3.07       13.68 o
  -4  18   3       17.22       12.70       19.09 o
  -3  18   3        4.31        1.06        6.00 o
  -2  18   3        3.50        3.67        4.49 o
  -1  18   3       15.87       10.65        7.47 o
   0  18   3       10.54        2.02        6.29 o
   1  18   3       -0.84        0.78        0.73 o
   2  18   3       20.33       22.48       15.53 o
   3  18   3        7.52        4.28        7.87 o
   4  18   3       38.72       39.07       16.71 o
   5  18   3        0.28        0.23        1.87 o
  -5  19   3       18.29       19.72       23.38 o
  -4  19   3      534.83      521.77       18.18 o
  -3  19   3        3.11        2.85        4.43 o
  -2  19   3      131.16      141.14        8.48 o
  -1  19   3       33.88       35.82        7.89 o
   0  19   3        2.58        2.74        2.49 o
   1  19   3       20.84       17.37       12.87 o
   2  19   3       60.67       63.33        6.97 o
   3  19   3        7.26        1.56        7.92 o
   4  19   3      795.52      766.67       27.73 o
   5  19   3       10.08       21.16       14.87 o
  -5  20   3       -3.20        6.46        9.34 o
  -4  20   3      640.26      576.74       22.15 o
  -3  20   3       -0.77        0.02        1.21 o
  -2  20   3      184.60      172.05        9.47 o
  -1  20   3        4.81        2.02        5.07 o
   0  20   3     1054.02     1012.34       18.36 o
   1  20   3        5.81        1.56        4.92 o
   2  20   3      247.06      249.02       11.23 o
   3  20   3       -3.13        0.01        5.73 o
   4  20   3      369.23      370.09       19.63 o
   5  20   3        8.31        1.78       19.09 o
  -5  21   3       27.68       40.60       24.06 o
  -4  21   3        3.12        1.29        6.92 o
  -3  21   3        5.54        0.12        5.66 o
  -2  21   3       31.85       32.12       17.14 o
  -1  21   3       15.31       23.76        9.62 o
   0  21   3      233.78      226.84        8.37 o
   1  21   3       40.04       33.36        6.16 o
   2  21   3        5.38        3.78        6.54 o
   3  21   3       -3.21        0.03        5.80 o
   4  21   3       29.43       21.12       29.76 o
   5  21   3       23.38       29.79       30.90 o
  -5  22   3       15.01       12.61       20.10 o
  -4  22   3       60.79       62.02       10.36 o
  -3  22   3       -0.16        0.02        1.33 o
  -2  22   3        0.34        1.23        1.19 o
  -1  22   3        5.34        2.25        3.88 o
   0  22   3     7975.17     8121.65      103.39 o
   1  22   3        4.90        4.73        3.70 o
   2  22   3        5.34        6.73        6.66 o
   3  22   3       -8.48        0.04        7.80 o
   4  22   3       72.09       68.16       10.96 o
   5  22   3        3.52        6.06       14.43 o
  -5  23   3       71.61       76.52       13.29 o
  -4  23   3        3.60        1.70        7.20 o
  -3  23   3        5.64        2.38        6.76 o
  -2  23   3       52.19       56.40        7.94 o
  -1  23   3        0.01        0.01        1.05 o
   0  23   3      117.43       99.95        7.03 o
   1  23   3       14.31       13.54        9.84 o
   2  23   3       31.54       21.40        7.96 o
   3  23   3      -14.20        1.39       11.89 o
   4  23   3       41.49       37.37       15.39 o
   5  23   3       84.64      122.03       22.51 o
  -5  24   3        5.96       28.48        9.37 o
  -4  24   3      235.17      205.04       16.35 o
  -3  24   3       -0.52        1.90        1.45 o
  -2  24   3       73.98       77.03        8.19 o
  -1  24   3        6.10        4.02        6.57 o
   0  24   3       -6.31        1.45        4.58 o
   1  24   3       29.18       25.27       16.09 o
   2  24   3      141.83      122.49       10.03 o
   3  24   3        4.23        2.74        6.42 o
   4  24   3       74.33       73.15       10.30 o
   5  24   3       -3.18        1.66       14.62 o
  -5  25   3       26.78       22.96       12.46 o
  -4  25   3      313.81      281.33       16.97 o
  -3  25   3        5.43        3.20        8.52 o
  -2  25   3       61.72       61.41        9.70 o
  -1  25   3      183.64      176.54        8.36 o
   0  25   3       11.84       13.17        9.06 o
   1  25   3      326.34      327.55       10.27 o
   2  25   3       17.54       18.41       17.77 o
   3  25   3        7.76        4.35       10.99 o
   4  25   3      416.31      345.70       18.61 o
   5  25   3       37.54       31.40       24.48 o
  -5  26   3        8.02        3.38       14.53 o
  -4  26   3       16.75       17.10       19.82 o
  -3  26   3       -9.08        0.35       10.82 o
  -2  26   3        2.54        6.30        3.97 o
  -1  26   3      581.89      531.66       13.59 o
   0  26   3       96.82      105.06        7.11 o
   1  26   3      411.55      401.88       11.61 o
   2  26   3       29.66       19.96       17.23 o
   3  26   3       -4.56        0.05        6.38 o
   4  26   3      102.65       72.35       12.58 o
   5  26   3       15.77        6.04       33.47 o
  -5  27   3       -5.90        1.91        7.59 o
  -4  27   3       33.63       23.12       25.81 o
  -3  27   3       20.66       18.94       12.69 o
  -2  27   3       27.94       31.59       18.56 o
  -1  27   3      119.51      110.74        8.19 o
   0  27   3       -2.15        0.98        3.44 o
   1  27   3        0.09        0.08        1.88 o
   2  27   3       11.66       11.26       12.03 o
   3  27   3        3.10        2.93        7.25 o
   4  27   3        0.86        0.69        2.52 o
   5  27   3       -9.16        0.19       17.35 o
  -5  28   3        6.71        6.46       15.25 o
  -4  28   3       97.02       90.65       12.32 o
  -3  28   3       59.44       65.93       10.57 o
  -2  28   3       59.58       66.77        7.98 o
  -1  28   3      152.12      151.90        7.94 o
   0  28   3       56.84       64.85        6.83 o
   1  28   3      401.21      393.26       13.44 o
   2  28   3      135.20      125.62       11.69 o
   3  28   3       32.93       31.21        9.17 o
   4  28   3       60.90       55.04       10.99 o
   5  28   3       17.88        3.93       25.87 o
  -5  29   3       10.76       13.76       16.93 o
  -4  29   3       32.07       32.50       12.07 o
  -3  29   3      108.76      130.97       11.76 o
  -2  29   3      223.28      220.55       12.67 o
  -1  29   3      370.80      386.52       12.57 o
   0  29   3       -3.91        0.10        4.32 o
   1  29   3      323.09      318.04       11.86 o
   2  29   3      124.41      134.80       12.58 o
   3  29   3      189.90      216.91       15.69 o
   4  29   3       51.18       40.57       15.61 o
   5  29   3       40.18       25.25       23.97 o
  -5  30   3      -10.04        2.67       13.46 o
  -4  30   3        3.05       10.36        6.32 o
  -3  30   3       21.94       20.33       22.41 o
  -2  30   3       12.45        5.38       12.29 o
  -1  30   3       18.56       19.94       12.47 o
   0  30   3       20.50       20.68       14.20 o
   1  30   3        3.64        4.65        5.45 o
   2  30   3       31.82       19.54       27.77 o
   3  30   3        8.98        9.85       13.41 o
   4  30   3       23.90       23.35       26.98 o
   5  30   3        0.09        0.01        4.00 o
  -5  31   3       -6.42        0.31       14.59 o
  -4  31   3        7.59        0.44       11.69 o
  -3  31   3      387.16      448.69       18.02 o
  -2  31   3       66.17       74.34        8.51 o
  -1  31   3        8.65        0.07        9.49 o
   0  31   3        2.51        0.00        4.60 o
   1  31   3        9.82        0.09        9.29 o
   2  31   3      167.90      154.91       13.53 o
   3  31   3      192.73      217.08       14.16 o
   4  31   3       -3.00        0.26        7.69 o
   5  31   3       -6.48        1.05       17.91 o
  -5  32   3       -1.88        8.46        5.02 o
  -4  32   3        3.24        0.19        6.57 o
  -3  32   3      545.00      638.80       20.52 o
  -2  32   3       63.27       80.58        9.42 o
  -1  32   3       23.47       12.51        8.14 o
   0  32   3       11.18        9.09        9.72 o
   1  32   3       36.95       32.35        9.33 o
   2  32   3       43.03       56.63        9.38 o
   3  32   3      654.35      690.64       22.86 o
   4  32   3        0.35        1.86        1.63 o
   5  32   3       13.03        2.49       24.20 o
  -5  33   3       14.16        4.60       18.97 o
  -4  33   3       -0.43        0.02        2.05 o
  -3  33   3        0.07        0.09        1.86 o
  -2  33   3       10.42       11.86       10.22 o
  -1  33   3       96.22      111.48       10.01 o
   0  33   3       -5.02        0.15        4.21 o
   1  33   3       58.44       69.95        8.32 o
   2  33   3       10.46       18.40       13.51 o
   3  33   3       90.87       90.72       12.35 o
   4  33   3        0.29        0.48        2.22 o
   5  33   3       18.89        8.13       35.99 o
  -5  34   3       12.35        0.51       15.51 o
  -4  34   3       -3.94        1.37        9.94 o
  -3  34   3       79.05       85.79       10.81 o
  -2  34   3       18.58       13.59       14.53 o
  -1  34   3        9.30        7.62        9.46 o
   0  34   3       -9.64        1.20        8.98 o
   1  34   3       27.51       24.38       18.13 o
   2  34   3       -0.02        0.06        2.39 o
   3  34   3      180.22      177.49       14.72 o
   4  34   3        6.38        1.30       12.51 o
   5  34   3       -0.01        0.00        2.25 o
  -4  35   3       -7.46        0.08        9.95 o
  -3  35   3      337.77      328.65       17.30 o
  -2  35   3        1.77        2.52        5.16 o
  -1  35   3        6.29        0.31        7.22 o
   0  35   3        7.37        0.62        8.59 o
   1  35   3        8.51        0.89       11.61 o
   2  35   3       15.22       10.38       13.02 o
   3  35   3      434.96      433.69       19.15 o
   4  35   3       11.75        0.08       19.42 o
  -4  36   3        6.37        2.26        8.91 o
  -3  36   3      253.03      271.85       16.34 o
  -2  36   3       -6.60        7.37       11.88 o
  -1  36   3        1.27        2.95        3.12 o
   0  36   3       -1.39        2.65        2.34 o
   1  36   3        6.71        3.22        6.98 o
   2  36   3        6.55        1.44       10.34 o
   3  36   3      137.67      138.45       13.20 o
   4  36   3        1.41        3.83        5.64 o
  -4  37   3       -6.67        0.77       13.31 o
  -3  37   3        8.74       15.16       12.37 o
  -2  37   3        2.72        2.53        6.05 o
  -1  37   3      201.99      246.75       12.52 o
   0  37   3       -0.43        0.52        1.34 o
   1  37   3      126.24      138.04       10.31 o
   2  37   3        5.04        1.90       10.14 o
   3  37   3        6.99        2.40        9.67 o
   4  37   3        6.42        0.60       14.02 o
  -4  38   3        8.44        8.79       15.98 o
  -3  38   3       51.50       45.62        9.90 o
  -2  38   3       -6.12        0.24        8.00 o
  -1  38   3      278.52      310.64       13.62 o
   0  38   3        9.46        7.62        9.47 o
   1  38   3      313.25      321.12       14.24 o
   2  38   3        0.06        0.34        1.99 o
   3  38   3      115.88      118.84       13.27 o
   4  38   3       18.71        9.32       22.27 o
  -4  39   3       -0.79        0.60        2.48 o
  -3  39   3      134.92      132.60       13.68 o
  -2  39   3       10.56        5.32       12.36 o
  -1  39   3      113.09      117.01       10.11 o
   0  39   3       -1.61        0.01        3.70 o
   1  39   3      235.00      259.95       13.24 o
   2  39   3        8.81       13.00       12.01 o
   3  39   3       97.92      101.70       12.19 o
   4  39   3        4.75        3.36       10.55 o
  -4  40   3       14.70        7.48       15.88 o
  -3  40   3       23.58        3.85       20.51 o
  -2  40   3        0.65        0.74        1.37 o
  -1  40   3       47.68       50.74       12.64 o
   0  40   3       12.10       24.09       15.38 o
   1  40   3        1.54        0.76        4.18 o
   2  40   3       -0.07        0.00        2.28 o
   3  40   3        0.21        0.03        2.22 o
   4  40   3        4.32        6.59       12.65 o
  -4  41   3        5.26       10.53       11.13 o
  -3  41   3       -0.47        2.09        1.71 o
  -2  41   3        4.26        0.68        9.46 o
  -1  41   3      222.36      263.37       13.24 o
   0  41   3        9.29        0.72       11.32 o
   1  41   3      170.40      188.01       13.09 o
   2  41   3       -8.01        2.40       10.67 o
   3  41   3       15.31        1.74       17.94 o
   4  41   3       19.15       11.20       25.18 o
  -4  42   3       16.92       23.07       21.36 o
  -3  42   3        3.81        0.10        6.98 o
  -2  42   3       10.90        3.82       16.26 o
  -1  42   3      208.45      233.30       13.05 o
   0  42   3       99.42       83.67       10.94 o
   1  42   3      234.11      277.12       14.90 o
   2  42   3        0.14        0.01        1.51 o
   3  42   3        3.06        0.66        6.91 o
   4  42   3       20.35       18.13       27.49 o
  -4  43   3       12.25       10.17       18.41 o
  -3  43   3       32.39       36.25       12.24 o
  -2  43   3       13.03        7.96       16.51 o
  -1  43   3        3.12        4.99        6.25 o
   0  43   3       27.92        4.60       18.03 o
   1  43   3       39.16       35.18       12.04 o
   2  43   3       10.40       10.29       13.27 o
   3  43   3       21.16       27.59       23.01 o
   4  43   3       24.50        6.32       31.13 o
  -3  44   3        0.19        0.03        1.96 o
  -2  44   3       -6.38        0.88       12.09 o
  -1  44   3        1.55       13.65        4.25 o
   0  44   3      678.15      547.73       21.98 o
   1  44   3        5.22        8.62        8.91 o
   2  44   3        7.00        2.72        9.72 o
   3  44   3      -23.61        1.34       20.73 o
  -3  45   3       -4.29        5.80        9.07 o
  -2  45   3        0.68        0.58        2.13 o
  -1  45   3      -13.37        1.54       18.43 o
   0  45   3        9.03        1.09       14.27 o
   1  45   3        0.39        0.05        1.30 o
   2  45   3       -2.15        0.86        6.36 o
   3  45   3       13.43        5.09       14.89 o
  -3  46   3       11.47        1.69       18.25 o
  -2  46   3       21.94        4.19       14.57 o
  -1  46   3        4.84       19.00        8.48 o
   0  46   3      243.60      224.80       17.92 o
   1  46   3        3.48        6.92        6.61 o
   2  46   3       14.47        5.85       21.61 o
   3  46   3        0.00        0.01        1.83 o
  -3  47   3       26.09       26.79       28.19 o
  -2  47   3        5.28        0.50        7.76 o
  -1  47   3       30.19       39.45       12.06 o
   0  47   3        8.82        6.06       10.71 o
   1  47   3       56.20       74.53       12.29 o
   2  47   3       -1.23        1.34        5.45 o
   3  47   3       44.41       25.92       13.10 o
  -3  48   3        1.91        0.43        6.81 o
  -2  48   3       17.80        5.07       15.21 o
  -1  48   3       99.51      126.01       15.42 o
   0  48   3      172.72      147.06       16.09 o
   1  48   3       93.27      108.78       13.33 o
   2  48   3       -2.79        5.74        8.78 o
   3  48   3       35.21        2.41       17.67 o
  -3  49   3        1.85        2.63        6.40 o
  -2  49   3       -4.12        0.17       10.06 o
  -1  49   3       33.51       40.99       20.04 o
   0  49   3       -3.80        2.44        4.87 o
   1  49   3       26.45       23.65        9.58 o
   2  49   3       10.06        1.41       13.42 o
   3  49   3        1.77        0.15        8.91 o
  -3  50   3       10.38        4.17       19.01 o
  -2  50   3       40.12       41.71       14.78 o
  -1  50   3        8.87       14.28       14.45 o
   0  50   3       20.86       15.77       24.46 o
   1  50   3       21.19       23.31       25.89 o
   2  50   3       57.23       49.02       12.71 o
   3  50   3        2.86        1.94        9.97 o
  -2  51   3       63.13       51.19       15.05 o
  -1  51   3       10.42       18.34       19.22 o
   0  51   3        4.30        2.41       11.95 o
   1  51   3       19.56       14.27       20.26 o
   2  51   3       78.30       57.71       13.57 o
  -2  52   3       62.93       72.45       17.36 o
  -1  52   3       11.22        2.61       18.34 o
   0  52   3       72.81       68.17       15.42 o
   1  52   3        3.29        0.74        8.40 o
   2  52   3       35.71       41.27       13.05 o
  -2  53   3        3.91        4.96       11.66 o
  -1  53   3        1.98        1.01        6.03 o
   0  53   3       12.71        0.74       17.96 o
   1  53   3       -3.70        1.80        6.68 o
   2  53   3       64.35       40.88       13.91 o
  -2  54   3      125.04       96.99       18.36 o
  -1  54   3        2.89        0.04        9.13 o
   0  54   3        2.58        3.64       10.93 o
   1  54   3       -8.41        0.05       11.68 o
   2  54   3      139.04      144.18       16.49 o
  -1  55   3       -5.37        0.70       11.01 o
   0  55   3        8.03        0.81       16.48 o
   1  55   3      -11.64        0.51       16.20 o
  -1  56   3        0.00        0.00        4.14 o
   0  56   3       32.68       32.36       18.83 o
   1  56   3       18.15        1.16       26.36 o
   0  57   3       18.44        1.42       33.92 o
  -5   0   4       20.96       17.42       32.55 o
  -4   0   4       -6.25        4.09       13.94 o
  -3   0   4        0.72        1.41        1.93 o
  -2   0   4       -0.25        7.03        1.51 o
  -1   0   4       41.98       38.06        6.45 o
   0   0   4      833.35      782.76       21.54 o
   1   0   4      148.82      130.33        9.63 o
   2   0   4       -4.45        1.87        6.69 o
   3   0   4        0.69        0.04        1.53 o
   4   0   4        0.64        8.82        2.74 o
   5   0   4        2.24        0.38        8.35 o
  -5   1   4       21.94       26.03       25.67 o
  -4   1   4       42.77       44.75       11.07 o
  -3   1   4        0.51        0.16        1.47 o
  -2   1   4       19.05       23.70       13.94 o
  -1   1   4       33.31       33.41       12.51 o
   0   1   4     3644.94     3265.71       49.54 o
   1   1   4        9.43        7.56        8.28 o
   2   1   4       22.45       12.99       14.57 o
   3   1   4       12.42        2.34       11.25 o
   4   1   4       49.86       42.55       11.44 o
   5   1   4       62.20       39.44       12.91 o
  -5   2   4        7.55       17.62       11.89 o
  -4   2   4      135.79      129.92       12.50 o
  -3   2   4       49.12       34.23        9.23 o
  -2   2   4        3.66        4.61        4.77 o
  -1   2   4       41.82       46.55        5.91 o
   0   2   4        8.17        3.99        5.08 o
   1   2   4       54.01       59.64        6.69 o
   2   2   4       67.51       64.84        7.98 o
   3   2   4       39.25       35.81        9.47 o
   4   2   4       25.60       24.51        7.09 o
   5   2   4        4.25        4.15       10.08 o
  -5   3   4        3.53        5.19        6.23 o
  -4   3   4        0.00        0.00        2.03 o
  -3   3   4        3.81        4.94        5.91 o
  -2   3   4       33.98       33.12       15.38 o
  -1   3   4       19.98       20.07        3.30 o
   0   3   4      531.09      521.07       11.46 o
   1   3   4      190.79      196.54        8.55 o
   2   3   4        3.62        4.98        4.34 o
   3   3   4        8.34        4.09        9.63 o
   4   3   4      105.35       81.05       12.03 o
   5   3   4       23.06       18.47       25.87 o
  -5   4   4       10.70        6.11       13.68 o
  -4   4   4      132.22      102.65       12.86 o
  -3   4   4       -0.79        4.15        1.64 o
  -2   4   4       10.68        9.65        6.86 o
  -1   4   4      241.55      232.86        8.85 o
   0   4   4       17.09       12.50        9.23 o
   1   4   4       16.78       18.91        3.07 o
   2   4   4        1.05        1.19        2.71 o
   3   4   4        4.42        4.79        5.81 o
   4   4   4      174.92      191.85       13.66 o
   5   4   4        9.29        7.71       15.28 o
  -5   5   4        4.66        8.23        9.55 o
  -4   5   4      162.44      143.82       14.03 o
  -3   5   4       16.33       13.34       17.00 o
  -2   5   4        6.01        3.99        6.02 o
  -1   5   4      842.18      930.40       15.79 o
   0   5   4        0.36        9.29        0.77 o
   1   5   4      698.19      754.72       15.18 o
   2   5   4        0.54        3.09        1.20 o
   3   5   4        0.54        0.16        1.49 o
   4   5   4      121.14      101.97       11.43 o
   5   5   4       27.83       19.46       32.57 o
  -5   6   4       30.20       13.98       25.79 o
  -4   6   4       36.22       33.28       12.62 o
  -3   6   4       16.99        6.13       13.40 o
  -2   6   4        3.35        4.05        4.46 o
  -1   6   4      138.64      139.52        6.46 o
   0   6   4        3.80        0.24        3.69 o
   1   6   4      675.03      675.80       14.53 o
   2   6   4       35.65       36.68       11.43 o
   3   6   4       -1.64        1.19        3.74 o
   4   6   4        0.53        0.30        2.04 o
   5   6   4       -1.12        5.29        4.37 o
  -5   7   4        8.45        5.16       11.82 o
  -4   7   4        0.17        0.44        1.67 o
  -3   7   4       31.75       31.48        6.14 o
  -2   7   4      240.60      183.70       10.64 o
  -1   7   4      332.57      327.20       10.61 o
   0   7   4       85.43       87.62        5.81 o
   1   7   4       35.37       35.52        4.10 o
   2   7   4      131.07      123.14        8.97 o
   3   7   4      176.09      174.27       11.50 o
   4   7   4       11.74       12.08       12.63 o
   5   7   4       11.50        9.12       11.86 o
  -5   8   4        3.08        4.07        5.94 o
  -4   8   4        4.42       11.82        6.04 o
  -3   8   4      747.10      720.52       18.62 o
  -2   8   4      144.08      117.27        8.92 o
  -1   8   4      137.83      142.70        7.17 o
   0   8   4       10.54        6.57        6.88 o
   1   8   4      120.53      115.67        7.20 o
   2   8   4      122.70       99.00        8.83 o
   3   8   4      515.04      540.35       16.24 o
   4   8   4       24.09       19.15       20.53 o
   5   8   4        0.45        0.12        2.28 o
  -5   9   4        8.33        3.75       11.54 o
  -4   9   4       -1.21        0.01        2.63 o
  -3   9   4      305.15      298.19       14.66 o
  -2   9   4       87.62       80.72        7.03 o
  -1   9   4       18.95        6.74       10.42 o
   0   9   4       -0.25        1.53        0.90 o
   1   9   4        0.09        0.02        1.01 o
   2   9   4      299.65      261.71       11.99 o
   3   9   4       11.48       11.76        3.91 o
   4   9   4        7.60        0.08       11.79 o
   5   9   4        0.12        4.96        2.02 o
  -5  10   4       14.76       10.88       18.30 o
  -4  10   4       -3.90        4.59        6.82 o
  -3  10   4        4.30        5.97        7.45 o
  -2  10   4      108.50       91.04        8.64 o
  -1  10   4      106.55      111.03        6.48 o
   0  10   4        1.29        0.10        1.72 o
   1  10   4      223.37      209.13        9.32 o
   2  10   4       11.72       10.11        5.63 o
   3  10   4      181.27      160.57       13.17 o
   4  10   4        4.22        0.89        7.31 o
   5  10   4       -1.73        2.80        5.00 o
  -5  11   4        2.09        1.03        4.79 o
  -4  11   4       13.98        6.61       11.10 o
  -3  11   4      883.17      911.45       20.77 o
  -2  11   4        5.73       10.27        6.44 o
  -1  11   4      228.56      249.21        9.04 o
   0  11   4       45.76       53.06        5.07 o
   1  11   4       33.35       38.91        4.51 o
   2  11   4       20.82       30.55       12.66 o
   3  11   4     1121.35     1208.31       28.09 o
   4  11   4        7.22        2.49       13.20 o
   5  11   4      -12.28       11.08       12.05 o
  -5  12   4       -5.82        1.45       10.35 o
  -4  12   4       20.24       16.50       19.56 o
  -3  12   4       13.40       13.39        3.58 o
  -2  12   4      328.67      312.40       12.39 o
  -1  12   4       19.07       29.47        9.92 o
   0  12   4        6.63        8.07        5.43 o
   1  12   4       96.96       80.38        7.37 o
   2  12   4       77.39       71.78        7.14 o
   3  12   4      297.24      310.36       15.59 o
   4  12   4       18.93       26.18       18.75 o
   5  12   4        0.99        0.14        1.96 o
  -5  13   4        2.82        5.10        7.95 o
  -4  13   4        7.64        0.68       11.19 o
  -3  13   4      132.60      138.46       10.24 o
  -2  13   4       16.36       14.84       11.09 o
  -1  13   4        0.31        1.30        0.83 o
   0  13   4       11.68        6.69        7.77 o
   1  13   4       -0.69        0.03        1.03 o
   2  13   4       66.62       59.88        7.37 o
   3  13   4       24.12       22.94        7.42 o
   4  13   4       -0.16        0.54        1.82 o
   5  13   4        1.10        4.24        5.12 o
  -5  14   4       21.66       26.52       24.13 o
  -4  14   4       -0.14        1.65        1.74 o
  -3  14   4      867.29      876.13       20.56 o
  -2  14   4      106.28      113.76        7.96 o
  -1  14   4      240.21      227.57        9.12 o
   0  14   4       -9.96        0.26        6.83 o
   1  14   4      186.87      168.15        8.72 o
   2  14   4      272.57      300.31       10.82 o
   3  14   4      376.97      418.61       15.66 o
   4  14   4        0.06        0.01        1.97 o
   5  14   4       10.78        9.85       18.78 o
  -5  15   4        0.61        0.48        2.77 o
  -4  15   4       -4.68        1.10        9.03 o
  -3  15   4      298.18      279.87       12.45 o
  -2  15   4       96.75       95.02        8.45 o
  -1  15   4      628.68      635.75       13.75 o
   0  15   4       48.77       54.87        6.38 o
   1  15   4       63.60       65.00        5.29 o
   2  15   4       38.81       35.70        5.71 o
   3  15   4      382.80      405.69       16.29 o
   4  15   4        7.48        2.81       10.43 o
   5  15   4       43.50       25.92       20.69 o
  -5  16   4       15.54       22.95       19.20 o
  -4  16   4        1.29        0.85        3.79 o
  -3  16   4       36.13       44.37        6.24 o
  -2  16   4        0.22        0.09        1.36 o
  -1  16   4       48.95       47.72        4.44 o
   0  16   4       10.03       10.19        7.34 o
   1  16   4      714.55      702.18       15.98 o
   2  16   4       10.57        4.05        8.94 o
   3  16   4      188.94      220.36       13.66 o
   4  16   4        9.30        8.85       12.11 o
   5  16   4       22.71       13.82       18.54 o
  -5  17   4        9.38        9.05       14.41 o
  -4  17   4       15.72       11.26       13.37 o
  -3  17   4       87.72       81.17        9.40 o
  -2  17   4       -0.09        3.07        1.26 o
  -1  17   4     1201.11     1275.40       21.66 o
   0  17   4       11.22       13.54        7.30 o
   1  17   4     1765.59     1840.54       29.49 o
   2  17   4       -0.94        8.64        1.61 o
   3  17   4        3.80        4.10        9.85 o
   4  17   4       -0.99        0.49        2.25 o
   5  17   4       -2.63        7.73        6.35 o
  -5  18   4       31.75       39.16       17.49 o
  -4  18   4       15.25       20.54       19.41 o
  -3  18   4       13.44       13.41       10.72 o
  -2  18   4       -6.04        1.84        6.68 o
  -1  18   4     1911.84     1996.90       29.19 o
   0  18   4        3.37        0.10        3.35 o
   1  18   4      903.01      990.75       19.38 o
   2  18   4        0.00        0.00        1.10 o
   3  18   4        7.96       10.42       11.75 o
   4  18   4        5.00       10.05        8.16 o
   5  18   4       20.54       23.76       31.53 o
  -5  19   4        5.54        3.89        5.79 o
  -4  19   4       -1.95        0.31        5.62 o
  -3  19   4       -7.64        1.23        9.03 o
  -2  19   4        6.55        3.27        6.44 o
  -1  19   4      214.44      220.94        9.56 o
   0  19   4        0.57        9.79        1.04 o
   1  19   4       43.10       41.57        5.37 o
   2  19   4        3.88        4.74        5.38 o
   3  19   4        4.06        0.86        7.01 o
   4  19   4        6.12        4.45       11.54 o
   5  19   4      110.13      128.29       15.77 o
  -5  20   4      697.46      639.42       29.76 o
  -4  20   4       -3.38        1.52        7.76 o
  -3  20   4       10.02       10.23       12.31 o
  -2  20   4       13.03        3.76        8.61 o
  -1  20   4       16.98       16.71        3.28 o
   0  20   4        0.32        1.92        1.00 o
   1  20   4      323.60      328.87       11.60 o
   2  20   4        3.44        7.07        4.44 o
   3  20   4       15.40       18.35       15.58 o
   4  20   4        6.32        0.53       12.41 o
   5  20   4      521.59      461.58       24.61 o
  -5  21   4        6.61        3.10       11.81 o
  -4  21   4       -1.68        0.04        5.56 o
  -3  21   4       28.53       20.68       18.93 o
  -2  21   4        4.99        4.79        7.15 o
  -1  21   4      211.41      208.37        9.05 o
   0  21   4      317.88      315.27       10.26 o
   1  21   4      395.76      415.90       12.57 o
   2  21   4        8.24        7.07       10.02 o
   3  21   4        0.01        0.02        1.75 o
   4  21   4       -7.74        0.71        9.53 o
   5  21   4       60.28       50.96       13.94 o
  -5  22   4      126.56      117.40       17.06 o
  -4  22   4       -5.96        0.38        8.77 o
  -3  22   4       13.25       15.28       12.05 o
  -2  22   4       -4.04        1.11        5.38 o
  -1  22   4       20.61       18.38       14.99 o
   0  22   4       56.26       61.23        6.47 o
   1  22   4       11.47       10.54        8.28 o
   2  22   4        6.60        1.35        8.86 o
   3  22   4       14.98       20.25       13.78 o
   4  22   4       -3.88        0.53        7.28 o
   5  22   4      102.59       95.84       14.61 o
  -5  23   4        2.90        2.69        3.11 o
  -4  23   4       11.12        3.74       16.14 o
  -3  23   4        8.54        6.95        8.59 o
  -2  23   4        7.42        2.00        6.88 o
  -1  23   4       17.63       17.73       14.35 o
   0  23   4      364.54      335.24       11.17 o
   1  23   4       44.44       38.19        9.15 o
   2  23   4       -1.87        1.24        3.40 o
   3  23   4       -2.33        4.56        4.66 o
   4  23   4       -1.62        2.90        3.25 o
   5  23   4      266.14      249.90       21.02 o
  -5  24   4      971.55      934.08       36.28 o
  -4  24   4       60.38       53.12       11.68 o
  -3  24   4       30.61       14.54       22.52 o
  -2  24   4        0.58        0.40        1.54 o
  -1  24   4       44.60       47.68        7.22 o
   0  24   4        2.44        0.20        2.91 o
   1  24   4       57.10       56.37        7.38 o
   2  24   4        0.71        9.41        1.58 o
   3  24   4        6.93        3.36        8.75 o
   4  24   4       24.23       28.17       23.34 o
   5  24   4      776.92      677.38       31.34 o
  -5  25   4       21.39       13.59       12.42 o
  -4  25   4        1.43        1.09        4.64 o
  -3  25   4       -0.89        1.89        1.26 o
  -2  25   4       27.21       24.10       17.63 o
  -1  25   4       89.95       84.07        8.00 o
   0  25   4      154.69      166.50        8.67 o
   1  25   4      413.83      408.54       14.38 o
   2  25   4        8.23        7.19        9.91 o
   3  25   4       -4.62        9.00        6.13 o
   4  25   4        0.62       14.24        2.47 o
   5  25   4      160.52      123.91       18.73 o
  -5  26   4       31.79       14.78       42.28 o
  -4  26   4       55.80       58.00       11.00 o
  -3  26   4       15.31       13.82       16.20 o
  -2  26   4       -8.64        1.72        9.98 o
  -1  26   4      432.33      417.62       15.15 o
   0  26   4       -3.55        3.29        4.48 o
   1  26   4       40.06       44.24        5.71 o
   2  26   4       -6.00        2.73        5.59 o
   3  26   4       19.73       19.37       17.12 o
   4  26   4       74.80       80.75       13.40 o
   5  26   4        0.05        0.01        4.03 o
  -5  27   4       33.01       17.70       16.42 o
  -4  27   4       56.60       78.51       11.71 o
  -3  27   4        7.04        9.80        8.85 o
  -2  27   4        6.98        9.85       10.71 o
  -1  27   4      666.53      666.37       17.00 o
   0  27   4       38.63       36.48        7.67 o
   1  27   4      569.70      563.95       16.71 o
   2  27   4       15.72        4.62       18.56 o
   3  27   4       29.24       16.45       26.53 o
   4  27   4       47.78       54.58       11.46 o
   5  27   4        7.20       10.52       21.98 o
  -5  28   4       23.31       12.63       36.59 o
  -4  28   4       15.89       23.76       18.80 o
  -3  28   4       20.20       29.79       14.29 o
  -2  28   4        6.25        5.46       10.74 o
  -1  28   4      184.86      193.14       10.20 o
   0  28   4      -10.18        3.25        7.44 o
   1  28   4      429.17      467.48       15.16 o
   2  28   4       39.72       37.07       11.69 o
   3  28   4       -1.16        2.90        5.78 o
   4  28   4        0.50        2.08        1.92 o
   5  28   4       -5.78        8.08       14.84 o
  -4  29   4       -3.77        3.10        6.40 o
  -3  29   4       12.60       11.34       11.94 o
  -2  29   4       97.03      100.63       10.36 o
  -1  29   4      101.23       97.78       10.79 o
   0  29   4       -7.13        2.03        7.51 o
   1  29   4        0.13        0.18        2.02 o
   2  29   4       49.17       54.60        9.19 o
   3  29   4       87.71       71.81       13.67 o
   4  29   4       -3.46        1.57       10.33 o
  -4  30   4       -4.64        0.55        6.78 o
  -3  30   4      246.30      249.96       14.31 o
  -2  30   4      124.72      128.55       10.99 o
  -1  30   4       37.41       41.20       10.54 o
   0  30   4        0.65        2.34        1.56 o
   1  30   4       45.49       41.45        9.75 o
   2  30   4      164.33      150.18       12.95 o
   3  30   4      270.85      245.01       18.78 o
   4  30   4        3.36        1.88        7.83 o
  -4  31   4       -0.26        0.15        1.95 o
  -3  31   4      127.43      111.07       13.62 o
  -2  31   4       37.75       43.75        8.49 o
  -1  31   4        8.43        1.44        9.37 o
   0  31   4        5.27        0.17        5.63 o
   1  31   4       11.87        2.49       13.24 o
   2  31   4      184.75      174.27       14.03 o
   3  31   4       27.74       20.65        8.37 o
   4  31   4       -2.14        3.14        6.69 o
  -4  32   4        1.18        1.62        3.30 o
  -3  32   4       10.02       12.81       14.47 o
  -2  32   4       50.03       56.32        9.79 o
  -1  32   4        0.26        0.07        1.55 o
   0  32   4        4.98        1.19        5.33 o
   1  32   4       -4.47        6.04        8.27 o
   2  32   4        1.68        1.33        5.38 o
   3  32   4       91.95       76.11       16.03 o
   4  32   4       -4.18        4.41       12.61 o
  -4  33   4       -2.31        0.38        6.60 o
  -3  33   4       86.66       78.34       12.48 o
  -2  33   4        4.29       16.31        6.14 o
  -1  33   4       23.67       28.42       18.71 o
   0  33   4        8.15        6.00        7.92 o
   1  33   4       12.52       10.25       13.49 o
   2  33   4       48.23       42.00       11.36 o
   3  33   4       71.38       52.38       11.84 o
   4  33   4        0.58        0.00        3.25 o
  -4  34   4       -3.05        3.93        9.77 o
  -3  34   4       -2.96        5.03        6.49 o
  -2  34   4      442.73      477.51       17.01 o
  -1  34   4       14.88       18.51       13.94 o
   0  34   4       -5.40        3.13        7.53 o
   1  34   4       47.16       45.40       12.45 o
   2  34   4      169.23      162.98       13.42 o
   3  34   4       15.27       10.37       19.28 o
   4  34   4       38.25       19.28       15.00 o
  -4  35   4       -8.30        0.73       14.95 o
  -3  35   4       -1.49        0.09        4.86 o
  -2  35   4        2.81        2.34        2.65 o
  -1  35   4       23.96       15.50       21.60 o
   0  35   4        5.45        2.82        7.27 o
   1  35   4        3.48        3.15        7.31 o
   2  35   4      140.70      121.75       13.75 o
   3  35   4       21.69        2.47       20.50 o
   4  35   4        7.42        0.10       18.71 o
  -4  36   4       -2.89        1.09        7.63 o
  -3  36   4       20.21       26.83       22.42 o
  -2  36   4      103.13      114.29       10.35 o
  -1  36   4        4.40        1.41        8.52 o
   0  36   4       -2.69        0.30        5.51 o
   1  36   4       10.76        1.40       11.74 o
   2  36   4      266.34      307.23       17.00 o
   3  36   4       38.29       37.72       12.32 o
   4  36   4       12.68        5.24       20.02 o
  -4  37   4       12.74       11.29       16.40 o
  -3  37   4       -0.99        0.16        2.00 o
  -2  37   4      246.91      274.71       14.75 o
  -1  37   4        0.45        0.58        1.41 o
   0  37   4        3.94        5.92        4.75 o
   1  37   4       15.01        4.37       14.96 o
   2  37   4      194.10      206.81       14.68 o
   3  37   4       12.79        3.60       16.04 o
   4  37   4       20.67       17.17       23.17 o
  -4  38   4        2.67        2.85        4.65 o
  -3  38   4       -6.29       12.52        8.60 o
  -2  38   4       27.15       24.09       21.46 o
  -1  38   4       15.66       10.37       11.95 o
   0  38   4        5.73        8.01        6.71 o
   1  38   4       -0.71        0.60        1.50 o
   2  38   4        0.01        0.01        2.10 o
   3  38   4       12.97       13.76       17.50 o
   4  38   4       35.05       36.46       32.41 o
  -4  39   4       67.24       73.51       16.97 o
  -3  39   4       -5.58        0.65        7.08 o
  -2  39   4       -0.37        0.14        1.54 o
  -1  39   4        0.90        0.92        1.95 o
   0  39   4       -0.57       17.24        1.97 o
   1  39   4       56.68       43.81       14.14 o
   2  39   4        8.10        4.93        9.40 o
   3  39   4       -0.34        0.12        2.32 o
   4  39   4        7.68       11.96       13.62 o
  -3  40   4        6.38        9.07       11.61 o
  -2  40   4        7.05        1.16       12.19 o
  -1  40   4      136.46      130.86       11.90 o
   0  40   4       -0.57        1.68        2.27 o
   1  40   4      136.71      107.30       14.70 o
   2  40   4      -11.85        0.34       14.13 o
   3  40   4       11.58        6.23       15.64 o
  -3  41   4       -0.24        0.02        2.18 o
  -2  41   4       36.00       15.41       15.04 o
  -1  41   4       90.34       92.83       11.65 o
   0  41   4       19.21        2.00       23.86 o
   1  41   4       19.73       13.31        9.60 o
   2  41   4       -1.59        5.20        3.32 o
   3  41   4        0.50        2.85        1.92 o
  -3  42   4       10.06       15.38       12.37 o
  -2  42   4        0.29        0.19        1.61 o
  -1  42   4       14.56        7.87       18.64 o
   0  42   4       -7.93        7.10       14.00 o
   1  42   4       20.10       27.69       23.50 o
   2  42   4        4.33        2.64        7.71 o
   3  42   4       21.08       21.14       25.56 o
  -3  43   4       -2.17        0.92        6.67 o
  -2  43   4       -7.23        0.00       10.89 o
  -1  43   4       50.23       49.99       11.02 o
   0  43   4      302.92      364.80       23.66 o
   1  43   4      105.69      100.27       14.68 o
   2  43   4        5.82        0.00       10.31 o
   3  43   4        2.58        2.01        8.12 o
  -3  44   4       -1.04        0.94        4.15 o
  -2  44   4       -0.87        0.01        2.09 o
  -1  44   4        7.95        0.24       12.65 o
   0  44   4       22.17       36.08       20.75 o
   1  44   4       -0.07        0.00        2.54 o
   2  44   4       11.49        0.27       14.41 o
   3  44   4        9.14        0.42       13.86 o
  -3  45   4        6.75        6.10       12.47 o
  -2  45   4       -5.83        2.17       10.30 o
  -1  45   4       -7.43        0.45       11.96 o
   0  45   4       12.33       10.87       16.96 o
   1  45   4       10.95        1.83       16.61 o
   2  45   4       -5.12        1.27       11.07 o
   3  45   4        4.27        3.91        8.05 o
  -3  46   4       -0.73       18.65        1.61 o
  -2  46   4       -0.08        0.06        2.77 o
  -1  46   4       50.46       49.98       14.11 o
   0  46   4       20.54       13.19       35.47 o
   1  46   4       37.31       52.23       15.10 o
   2  46   4       24.32        5.07       26.38 o
   3  46   4        1.23        6.40        4.94 o
  -2  47   4        5.82        2.88        8.67 o
  -1  47   4       75.55       53.79       16.99 o
   0  47   4       38.89       61.58       15.30 o
   1  47   4      289.49      265.77       20.48 o
   2  47   4        1.04        0.20        4.80 o
  -2  48   4        0.21        0.01        2.27 o
  -1  48   4       98.74      113.66       17.24 o
   0  48   4        8.70        0.76       24.02 o
   1  48   4        0.45        0.58        3.49 o
   2  48   4       -3.16        2.29        7.67 o
  -2  49   4       28.03        0.33       16.22 o
  -1  49   4      429.26      368.87       26.74 o
   0  49   4       17.87       14.06       24.05 o
   1  49   4      186.37      179.51       16.96 o
   2  49   4       -0.22        0.39        1.93 o
  -2  50   4       -2.62        1.71        6.46 o
  -1  50   4      244.77      214.18       21.88 o
   0  50   4       -5.16        1.04        8.52 o
   1  50   4      433.13      362.97       32.71 o
   2  50   4       -3.66        0.68        8.92 o
  -1  51   4       11.55        4.69       24.83 o
   0  51   4        1.43        9.41        6.00 o
   1  51   4       61.67       33.06       19.82 o
  -1  52   4       94.50       37.99       23.64 o
   0  52   4      -23.51        0.32       31.56 o
   1  52   4        1.30        1.64        4.86 o
  -1  53   4       16.56       16.96       22.68 o
   0  53   4        9.32        0.06       22.91 o
   1  53   4       16.35        9.47       26.01 o
  -5   1   5       44.00       46.92       13.27 o
  -4   1   5       15.39       15.47       12.35 o
  -3   1   5        0.00        0.02        1.68 o
  -2   1   5        6.37        8.15        8.15 o
  -1   1   5       52.04       54.57        7.55 o
   0   1   5       -3.15        0.98        3.66 o
   1   1   5        8.47       11.21        9.15 o
   2   1   5       15.71        9.53       12.05 o
   3   1   5       -3.81        0.39        3.48 o
   4   1   5        4.47       10.77        6.89 o
   5   1   5        8.50       23.02       11.84 o
  -5   2   5       21.59       29.52       10.93 o
  -4   2   5       -0.13        1.08        1.83 o
  -3   2   5        6.69        2.93        8.75 o
  -2   2   5        1.83        6.69        2.85 o
  -1   2   5       50.19       38.02        7.96 o
   0   2   5        5.16        3.05        5.58 o
   1   2   5        4.20        4.56        6.19 o
   2   2   5        2.61        2.63        4.42 o
   3   2   5        1.32        1.10        2.88 o
   4   2   5       57.99       36.70       11.88 o
   5   2   5       75.50       83.31       13.98 o
  -5   3   5       17.42       37.31       15.42 o
  -4   3   5       53.97       48.66       10.31 o
  -3   3   5        4.24        1.01        7.22 o
  -2   3   5       -9.70        1.12        6.62 o
  -1   3   5      169.07      138.66        8.70 o
   0   3   5        8.15        7.83        7.27 o
   1   3   5       48.96       43.28        6.64 o
   2   3   5       -0.03        0.00        1.59 o
   3   3   5       -3.02        6.84        5.43 o
   4   3   5       23.97       32.27       20.50 o
   5   3   5        4.35        8.23       11.28 o
  -5   4   5        7.56        1.24       10.00 o
  -4   4   5      167.79      166.20       13.99 o
  -3   4   5        0.27        2.51        1.82 o
  -2   4   5        3.69        1.55        6.18 o
  -1   4   5        2.84        2.08        1.25 o
   0   4   5        9.62        5.50        8.31 o
   1   4   5      377.55      317.25       13.66 o
   2   4   5        4.16        3.54        4.70 o
   3   4   5        5.21        0.96        6.02 o
   4   4   5        0.24        0.32        2.38 o
   5   4   5        3.64        3.51        9.01 o
  -5   5   5       -4.99        3.08        8.26 o
  -4   5   5       29.34       30.40        7.45 o
  -3   5   5      -14.04        2.92       10.69 o
  -2   5   5        2.49        6.96        5.01 o
  -1   5   5      129.16      104.42        7.80 o
   0   5   5        9.30        2.64        7.98 o
   1   5   5      191.95      167.23       10.78 o
   2   5   5        1.21        1.58        3.37 o
   3   5   5        4.08        0.48        6.52 o
   4   5   5      133.73      141.81       13.10 o
   5   5   5       -3.54        0.44        7.70 o
  -5   6   5       -3.90        0.23        7.81 o
  -4   6   5       15.48       18.65        9.34 o
  -3   6   5        0.83        2.58        1.69 o
  -2   6   5      134.35      138.10        9.69 o
  -1   6   5      368.03      312.73       11.37 o
   0   6   5       17.28       13.19       11.33 o
   1   6   5        1.10        0.95        0.97 o
   2   6   5       88.28      103.53        8.57 o
   3   6   5       -0.23        0.11        1.39 o
   4   6   5       86.59       95.90       11.74 o
   5   6   5        8.85        2.91       19.75 o
  -5   7   5      -11.03        1.89       12.63 o
  -4   7   5       79.19       57.69       11.57 o
  -3   7   5       53.30       52.91       11.60 o
  -2   7   5        6.39        7.11        2.38 o
  -1   7   5       29.31       21.63        5.17 o
   0   7   5       27.93       32.38       13.61 o
   1   7   5       98.48       72.23        9.18 o
   2   7   5      392.41      418.76       14.63 o
   3   7   5        5.55        5.23       10.10 o
   4   7   5        7.14        9.74        9.57 o
   5   7   5        9.70        0.78       10.52 o
  -5   8   5       13.40        1.20       16.37 o
  -4   8   5       12.99        7.11       13.84 o
  -3   8   5       23.30       41.74       15.06 o
  -2   8   5      178.61      173.35       10.62 o
  -1   8   5        7.22        2.97        8.31 o
   0   8   5       21.99       21.91       15.56 o
   1   8   5       14.31        3.80       13.31 o
   2   8   5      240.06      252.96       12.11 o
   3   8   5      100.89       81.69       10.84 o
   4   8   5       32.37       29.63       28.40 o
   5   8   5       -0.38        0.01        2.64 o
  -5   9   5       12.96        0.57       18.80 o
  -4   9   5        1.21        2.89        4.14 o
  -3   9   5        6.00        3.35       11.25 o
  -2   9   5     1057.54     1063.26       22.35 o
  -1   9   5       21.00        8.81       12.69 o
   0   9   5        5.69        0.90        6.35 o
   1   9   5       10.65        4.50        9.41 o
   2   9   5        5.16        5.99        1.81 o
   3   9   5       27.88       30.29       22.96 o
   4   9   5        7.51        1.02       10.70 o
   5   9   5      -11.61        1.10        9.50 o
  -5  10   5       -6.36        0.04        9.43 o
  -4  10   5       13.96        6.85       12.67 o
  -3  10   5       17.62       14.53       20.13 o
  -2  10   5       10.64        9.95        3.02 o
  -1  10   5       22.27       18.93       16.15 o
   0  10   5       -4.75        3.75        4.72 o
   1  10   5       15.28       10.76       13.51 o
   2  10   5      485.73      523.30       15.75 o
   3  10   5       34.31       36.49        9.84 o
   4  10   5       -0.13        0.24        1.04 o
   5  10   5       -2.23        0.19        6.57 o
  -5  11   5       -2.39        0.46        7.88 o
  -4  11   5        2.28        1.38        5.50 o
  -3  11   5       30.18       47.09       23.56 o
  -2  11   5       68.31       68.74        9.20 o
  -1  11   5        0.09        0.24        1.23 o
   0  11   5       13.39       17.32       12.62 o
   1  11   5       -0.65        5.62        1.31 o
   2  11   5       29.60       21.07        7.43 o
   3  11   5       12.04       19.18       14.46 o
   4  11   5       20.45        9.27       18.49 o
   5  11   5        0.55        0.11        2.79 o
  -5  12   5        0.00        0.00        2.83 o
  -4  12   5       15.80       16.09       15.94 o
  -3  12   5       10.04       19.99       13.17 o
  -2  12   5       45.24       43.66        4.79 o
  -1  12   5       12.42       14.91        9.52 o
   0  12   5       20.97       24.88       12.32 o
   1  12   5       13.22       10.21       11.20 o
   2  12   5     1191.40     1220.79       25.55 o
   3  12   5        3.46        4.28        4.58 o
   4  12   5        3.20        7.19        6.91 o
   5  12   5       -3.97        0.12        9.64 o
  -5  13   5       -2.23        0.06        6.75 o
  -4  13   5        1.26        4.26        6.24 o
  -3  13   5        0.15        7.02        1.61 o
  -2  13   5     1676.91     1701.86       30.11 o
  -1  13   5        0.81        0.70        1.35 o
   0  13   5       -0.37        1.44        0.69 o
   1  13   5       24.46       26.97       20.07 o
   2  13   5      428.28      434.19       14.91 o
   3  13   5        3.44        5.68        6.75 o
   4  13   5        0.36        0.12        1.82 o
   5  13   5       -1.30        0.00        5.05 o
  -5  14   5       11.93        0.64       13.13 o
  -4  14   5        4.25       10.01        5.49 o
  -3  14   5        9.01        2.57       11.02 o
  -2  14   5     1209.22     1178.05       24.50 o
  -1  14   5        2.30        3.02        3.21 o
   0  14   5        7.66        1.39        5.70 o
   1  14   5       18.20       10.95       12.39 o
   2  14   5      220.61      225.50       10.75 o
   3  14   5        6.62        7.25        8.96 o
   4  14   5        8.16        9.79       10.18 o
   5  14   5        0.67        0.47        2.83 o
  -5  15   5       -7.36        0.74       13.07 o
  -4  15   5       60.36       59.01       13.41 o
  -3  15   5        0.03        0.13        1.30 o
  -2  15   5       49.31       51.64        5.03 o
  -1  15   5       -2.99        2.38        4.46 o
   0  15   5       -1.80        1.40        3.40 o
   1  15   5       -0.01        0.02        1.56 o
   2  15   5     1242.79     1353.71       29.35 o
   3  15   5       37.83       44.99       10.97 o
   4  15   5        0.35        0.43        1.93 o
   5  15   5       -0.07        0.12        2.48 o
  -5  16   5        0.73        0.04        4.24 o
  -4  16   5      176.18      207.82       15.45 o
  -3  16   5       32.46       50.07       17.32 o
  -2  16   5      401.01      380.54       13.73 o
  -1  16   5        8.77       12.09        8.72 o
   0  16   5       66.06       60.87        7.43 o
   1  16   5       -0.01        0.01        1.32 o
   2  16   5      235.93      225.85       13.85 o
   3  16   5        0.00        0.00        2.04 o
   4  16   5      117.53      133.21       12.54 o
   5  16   5        9.64        4.28       15.38 o
  -5  17   5        2.67       15.89       11.55 o
  -4  17   5        0.14        0.16        0.61 o
  -3  17   5        1.55        1.64        4.77 o
  -2  17   5        8.42       11.25        7.80 o
  -1  17   5        0.43        3.35        1.49 o
   0  17   5       39.56       38.82        7.26 o
   1  17   5       31.87       26.05       21.11 o
   2  17   5       29.38       21.13       24.11 o
   3  17   5       34.36       24.17       30.57 o
   4  17   5      657.11      651.64       23.40 o
   5  17   5       21.84        2.26        9.77 o
  -5  18   5        0.00        0.00        3.16 o
  -4  18   5      345.19      394.32       19.18 o
  -3  18   5       20.68       18.40       15.59 o
  -2  18   5       17.99       19.40       13.17 o
  -1  18   5       34.44       35.51       17.32 o
   0  18   5        7.78       15.89        9.96 o
   1  18   5        0.02        1.38        1.31 o
   2  18   5        0.10        0.09        1.50 o
   3  18   5       -0.33        0.32        1.57 o
   4  18   5      289.51      304.99       16.82 o
   5  18   5       24.02       14.47       24.53 o
  -4  19   5      842.68      884.31       27.73 o
  -3  19   5       29.00       12.65        9.87 o
  -2  19   5        0.01        0.01        1.82 o
  -1  19   5       37.38       32.19       10.41 o
   0  19   5       33.50       35.73        7.36 o
   1  19   5       12.55       10.37       13.82 o
   2  19   5      106.79       97.48       11.58 o
   3  19   5       29.07       25.17       26.32 o
   4  19   5       47.55       47.87        8.55 o
  -4  20   5       37.38       40.21        7.23 o
  -3  20   5       12.01       17.98       11.08 o
  -2  20   5      126.73      117.69       10.19 o
  -1  20   5       -1.13        6.71        2.20 o
   0  20   5      417.31      416.86       13.59 o
   1  20   5        8.34        9.58        8.34 o
   2  20   5       17.40       15.92        8.13 o
   3  20   5       25.83       13.32       22.83 o
   4  20   5      635.41      604.53       27.38 o
  -4  21   5       93.18       99.42       12.72 o
  -3  21   5        2.45        5.99        6.13 o
  -2  21   5        1.18        4.98        3.10 o
  -1  21   5        0.09        0.20        1.29 o
   0  21   5     1892.11     1964.34       33.50 o
   1  21   5       35.77       38.60       26.11 o
   2  21   5       36.91       25.23       12.65 o
   3  21   5        0.38        3.03        1.57 o
   4  21   5      105.04       93.16       14.70 o
  -4  22   5      116.58      122.16       14.29 o
  -3  22   5       -8.73        0.85       10.59 o
  -2  22   5        9.75        7.32        7.85 o
  -1  22   5       70.97       64.14        9.00 o
   0  22   5     2756.95     2929.61       44.89 o
   1  22   5        4.85        3.40        7.95 o
   2  22   5        3.82        2.23        4.81 o
   3  22   5       -0.30        1.05        2.71 o
   4  22   5       18.22       16.74       10.55 o
  -4  23   5       57.13       67.80       13.95 o
  -3  23   5        0.56        6.16        1.57 o
  -2  23   5        0.12        0.13        1.16 o
  -1  23   5       18.35       17.75       15.58 o
   0  23   5      771.59      772.50       18.69 o
   1  23   5       16.00       29.05       13.22 o
   2  23   5       20.85       21.19       18.98 o
   3  23   5        2.52        4.29        5.18 o
   4  23   5       12.71       15.60       20.58 o
  -4  24   5        0.82        0.71        0.86 o
  -3  24   5        4.66        6.22        8.39 o
  -2  24   5       85.54       77.97       13.30 o
  -1  24   5       16.31       15.00       15.58 o
   0  24   5        3.64        0.68        6.20 o
   1  24   5       12.44       25.73       13.49 o
   2  24   5        1.20        1.04        3.88 o
   3  24   5        8.54        3.60       15.97 o
   4  24   5      279.71      280.72       21.17 o
  -4  25   5      300.57      254.10       21.43 o
  -3  25   5        2.24        1.23        4.13 o
  -2  25   5        0.06        0.16        1.90 o
  -1  25   5        5.93        5.84        8.86 o
   0  25   5      283.11      295.59       12.05 o
   1  25   5       21.05       12.53       18.90 o
   2  25   5       57.90       51.72       10.58 o
   3  25   5        5.85        6.43        9.88 o
   4  25   5       92.86       95.37       13.73 o
  -4  26   5      208.19      190.84       19.87 o
  -3  26   5        9.18        4.56       11.24 o
  -2  26   5       11.02       11.05       14.40 o
  -1  26   5        0.00        0.00        1.55 o
   0  26   5      116.96      106.54        9.39 o
   1  26   5       57.26       63.78        9.19 o
   2  26   5        1.63        0.93        4.27 o
   3  26   5       -0.45        0.07        2.26 o
   4  26   5       11.30        8.23        5.59 o
  -4  27   5       92.47       75.74       14.77 o
  -3  27   5        2.19        0.54        5.47 o
  -2  27   5        0.36        0.22        1.46 o
  -1  27   5       15.28       15.03       18.06 o
   0  27   5       11.22        3.95       12.51 o
   1  27   5       16.70       21.43       11.89 o
   2  27   5       10.52       21.90       13.55 o
   3  27   5       12.91        3.33       13.28 o
   4  27   5      126.20      111.18       15.92 o
  -4  28   5        5.20        6.17        5.42 o
  -3  28   5       11.71       15.77       11.76 o
  -2  28   5       94.29      107.77       12.49 o
  -1  28   5       54.15       51.23       11.62 o
   0  28   5        5.36        8.39        5.98 o
   1  28   5        1.16        1.04        4.52 o
   2  28   5        3.87        3.98        8.61 o
   3  28   5       -0.34        1.70        1.63 o
   4  28   5      174.05      147.92       17.95 o
  -4  29   5       55.16       37.56       14.08 o
  -3  29   5       18.12       27.74       15.78 o
  -2  29   5       10.44        9.47        4.13 o
  -1  29   5       23.58       14.76       18.04 o
   0  29   5       -6.76        2.87        7.99 o
   1  29   5       25.34       18.54       17.70 o
   2  29   5      194.78      212.26       14.18 o
   3  29   5       -0.38        0.36        2.42 o
   4  29   5       36.34       30.56       15.60 o
  -4  30   5       39.74       26.37       18.30 o
  -3  30   5       27.74       26.09       11.23 o
  -2  30   5       86.33       69.17       10.38 o
  -1  30   5       -0.30        0.27        1.74 o
   0  30   5       13.38       17.80       13.27 o
   1  30   5        4.41        2.96        5.01 o
   2  30   5       80.58       87.35       12.32 o
   3  30   5       19.63       38.16       15.58 o
   4  30   5        0.01        0.01        2.75 o
  -4  31   5        2.36        0.72        4.96 o
  -3  31   5        1.14        2.28        4.70 o
  -2  31   5      198.09      172.48       14.08 o
  -1  31   5       10.66        0.72       11.44 o
   0  31   5        2.98        2.48        4.40 o
   1  31   5       -1.68        1.28        3.68 o
   2  31   5        1.93        1.83        2.50 o
   3  31   5       28.44       45.82       30.31 o
   4  31   5        1.13        5.05        7.08 o
  -4  32   5       -1.09        0.81        4.93 o
  -3  32   5       61.49       51.39       10.46 o
  -2  32   5       30.55       37.21       10.05 o
  -1  32   5       17.20        6.01       13.39 o
   0  32   5        5.33        0.55        7.12 o
   1  32   5       -0.26        1.45        1.44 o
   2  32   5       56.56       56.24       11.83 o
   3  32   5       31.52       41.32       10.69 o
   4  32   5       -1.57        0.19        5.72 o
  -4  33   5       -9.43        1.68       14.22 o
  -3  33   5       41.43       47.49       14.03 o
  -2  33   5       -1.26        1.34        4.45 o
  -1  33   5        2.59        1.06        7.06 o
   0  33   5        4.70        0.69        7.86 o
   1  33   5       22.35       21.09       21.97 o
   2  33   5       43.29       35.98       15.97 o
   3  33   5        9.24       21.52       11.88 o
   4  33   5       -2.92        0.17        7.25 o
  -3  34   5       22.45       13.62       26.57 o
  -2  34   5        4.81        8.38        8.43 o
  -1  34   5       -4.57        3.82        7.92 o
   0  34   5        1.43        1.94        3.74 o
   1  34   5        6.35        1.79        9.59 o
   2  34   5       25.06       32.69       28.43 o
   3  34   5        0.41        2.92        1.50 o
  -3  35   5       19.13       35.54       20.91 o
  -2  35   5       10.37       20.73       13.40 o
  -1  35   5       -0.74        0.86        1.77 o
   0  35   5       24.94        6.95       31.11 o
   1  35   5       -2.16        0.24        8.19 o
   2  35   5        5.72        2.18        9.43 o
   3  35   5       31.79       18.22       17.40 o
  -3  36   5       -0.07        0.79        1.73 o
  -2  36   5       10.36        0.89       14.07 o
  -1  36   5       27.12        6.53       18.98 o
   0  36   5        2.29        1.04        7.62 o
   1  36   5        1.09        3.72        4.71 o
   2  36   5       -1.44        0.39        5.87 o
   3  36   5       26.40       60.91       30.83 o
  -3  37   5       15.22        8.42       20.67 o
  -2  37   5       -0.53        2.22        1.52 o
  -1  37   5        3.56        3.02        8.10 o
   0  37   5        2.58        0.19        5.86 o
   1  37   5       35.88       37.35       10.72 o
   2  37   5        1.53        0.13        4.80 o
   3  37   5        2.38        6.67        7.79 o
  -3  38   5       22.28       19.27       22.58 o
  -2  38   5        2.85        3.78        5.49 o
  -1  38   5       25.73       42.56       23.08 o
   0  38   5        5.38        1.63       10.42 o
   1  38   5       -1.71        8.66        3.92 o
   2  38   5       -9.59        1.11       16.09 o
   3  38   5        0.55        0.87        2.75 o
  -3  39   5       10.16        5.35       19.22 o
  -2  39   5        1.75        0.85        5.70 o
  -1  39   5       53.37       64.70       16.06 o
   0  39   5       -2.72        0.03        6.12 o
   1  39   5        0.63        1.30        2.38 o
   2  39   5        7.58        4.60       14.25 o
   3  39   5       10.50        6.05       24.60 o
  -3  40   5       -0.48        0.01        2.88 o
  -2  40   5        1.11        0.07        5.87 o
  -1  40   5       33.74       24.62       10.15 o
   0  40   5       -6.02       10.80        9.38 o
   1  40   5       42.16       52.28       14.32 o
   2  40   5       18.49        3.24       21.78 o
   3  40   5        9.91        0.90       17.20 o
  -3  41   5       -0.79        1.22        2.54 o
  -2  41   5       -2.61        1.73        8.28 o
  -1  41   5        0.21        0.34        2.50 o
   0  41   5       17.68        9.76       24.09 o
   1  41   5       48.02       35.49       14.32 o
   2  41   5        2.74        0.35        8.51 o
   3  41   5        0.21        0.03        2.40 o
  -2  42   5        0.26        0.01        1.53 o
  -1  42   5        3.86       12.16        8.72 o
   0  42   5       99.28       74.24       16.48 o
   1  42   5       11.00       25.45       18.27 o
   2  42   5       -8.39        2.65       13.03 o
  -2  43   5       -0.25        0.91        1.40 o
  -1  43   5       17.25       13.78       19.66 o
   0  43   5      323.46      320.69       23.23 o
   1  43   5        9.43        9.14       22.35 o
   2  43   5       -1.84        5.30        5.62 o
  -2  44   5       10.06        1.64       22.93 o
  -1  44   5       -3.69        5.59       10.88 o
   0  44   5      401.91      294.28       29.70 o
   1  44   5        1.81        0.23        6.39 o
   2  44   5        3.62        3.26        8.58 o
  -2  45   5        5.14        3.01       13.17 o
  -1  45   5        0.16        0.00        3.17 o
   0  45   5       40.42       25.87       13.06 o
   1  45   5        4.45        0.59        8.96 o
   2  45   5        9.52        1.73       23.07 o
  -1  46   5        2.07        2.23        6.08 o
   0  46   5       71.38       89.17       14.74 o
   1  46   5       32.53       11.36       47.72 o
  -1  47   5       -4.82       21.73       11.32 o
   0  47   5      221.69      232.43       21.89 o
   1  47   5        0.08        0.02        2.44 o
  -1  48   5       22.31        2.90       33.84 o
   0  48   5       80.65       83.11       16.69 o
   1  48   5       -1.24        2.93        3.91 o
   0  49   5      -12.23        2.65       12.01 o
  -4   0   6       -7.67        3.16       17.37 o
  -3   0   6        0.00        0.00        1.75 o
  -2   0   6       -0.26        0.00        2.63 o
  -1   0   6        2.77        2.27        4.32 o
   0   0   6      130.34      101.79       14.71 o
   1   0   6       -2.29        1.13        6.04 o
   2   0   6       -1.08        0.54        3.78 o
   3   0   6        5.42        3.42       12.18 o
   4   0   6        6.28        2.54       13.09 o
  -4   1   6        0.01        0.00        1.88 o
  -3   1   6      -11.69        2.52       12.63 o
  -2   1   6       -7.94        0.41        7.82 o
  -1   1   6        1.61        0.45        3.56 o
   0   1   6        5.88        0.95        7.72 o
   1   1   6       -3.13        6.30        4.47 o
   2   1   6       -2.70        0.28        4.40 o
   3   1   6        0.15        0.04        1.50 o
   4   1   6        4.61        3.15        8.74 o
  -4   2   6      -10.03        3.23        9.84 o
  -3   2   6        3.79        2.60        8.97 o
  -2   2   6       -0.03        0.13        1.39 o
  -1   2   6        0.01        0.01        1.28 o
   0   2   6       15.91       10.53       14.12 o
   1   2   6       13.43       21.46       12.57 o
   2   2   6        1.60        0.62        3.43 o
   3   2   6       -4.66        0.50        6.87 o
   4   2   6       -0.53        0.48        2.29 o
  -4   3   6       -0.65        0.26        2.21 o
  -3   3   6       -0.56        3.43        1.61 o
  -2   3   6        0.69        0.18        1.47 o
  -1   3   6       67.16       70.33        7.95 o
   0   3   6       -1.19        2.50        4.03 o
   1   3   6      136.42      158.11       10.88 o
   2   3   6        0.89        2.47        1.51 o
   3   3   6       -0.27        7.89        1.70 o
   4   3   6       -1.61        1.05        5.68 o
  -4   4   6        4.20        3.83        7.84 o
  -3   4   6       -0.25        0.01        1.67 o
  -2   4   6        5.11        3.75        8.52 o
  -1   4   6      174.96      169.04       11.52 o
   0   4   6       18.44        9.88       12.96 o
   1   4   6       72.43       79.19        8.43 o
   2   4   6        5.86       10.89        6.41 o
   3   4   6       -7.36        2.64       10.78 o
   4   4   6        3.71        1.52        9.41 o
  -4   5   6        7.12        1.20       11.68 o
  -3   5   6       63.98       64.16       10.55 o
  -2   5   6        8.59        6.62        9.64 o
  -1   5   6       85.45       71.13        9.54 o
   0   5   6       -5.30        1.42        6.33 o
   1   5   6       17.86       15.58        5.45 o
   2   5   6        1.25        1.67        3.41 o
   3   5   6       26.84       18.88       10.27 o
   4   5   6        3.98        0.77        6.04 o
  -4   6   6        1.15        0.33        3.27 o
  -3   6   6       72.81       78.08       10.72 o
  -2   6   6       12.61        5.64       12.99 o
  -1   6   6      123.85      119.97        9.47 o
   0   6   6        9.22       14.11       11.50 o
   1   6   6      319.90      344.06       13.85 o
   2   6   6        0.29        0.06        2.08 o
   3   6   6       49.27       53.06        9.53 o
   4   6   6       -2.27        1.05        3.86 o
  -4   7   6       -2.06        3.44        6.24 o
  -3   7   6       48.82       46.16        8.20 o
  -2   7   6       27.14       17.28       15.56 o
  -1   7   6      239.40      228.34       11.55 o
   0   7   6        8.41        3.04        5.94 o
   1   7   6      102.01      104.67        9.33 o
   2   7   6       -0.52       11.54        1.80 o
   3   7   6      207.49      215.12       15.01 o
   4   7   6       -4.51        1.49        5.64 o
  -4   8   6        5.63        1.82        9.91 o
  -3   8   6      154.39      149.77       13.33 o
  -2   8   6        4.81        5.50        7.58 o
  -1   8   6       30.71       31.39       24.88 o
   0   8   6        7.98        5.90        8.17 o
   1   8   6        2.60        1.87        5.54 o
   2   8   6       23.76       30.58       21.33 o
   3   8   6        1.47        1.33        2.91 o
   4   8   6       -0.78        0.11        1.55 o
  -4   9   6        9.82        1.71       12.97 o
  -3   9   6      392.36      447.35       17.67 o
  -2   9   6       21.66       17.04       18.02 o
  -1   9   6       31.71       21.97        9.63 o
   0   9   6       11.71        1.28       11.56 o
   1   9   6        3.97       19.79        5.40 o
   2   9   6       -0.34        1.75        1.41 o
   3   9   6      149.02      170.35       12.37 o
   4   9   6        7.72        2.25       13.76 o
  -4  10   6        0.68        0.31        1.79 o
  -3  10   6      451.77      452.35       17.80 o
  -2  10   6        5.91        1.46        9.93 o
  -1  10   6        0.09        0.82        1.21 o
   0  10   6       12.95       13.57       12.81 o
   1  10   6       45.18       43.46        9.13 o
   2  10   6       14.36       14.09       14.61 o
   3  10   6      659.82      657.47       22.48 o
   4  10   6       14.43        7.05       16.76 o
  -4  11   6       19.07       15.53       19.31 o
  -3  11   6       53.00       56.47        8.82 o
  -2  11   6       20.43       13.02       16.21 o
  -1  11   6      107.15      113.93       10.42 o
   0  11   6       12.23        4.74       13.42 o
   1  11   6       34.28       39.74        6.92 o
   2  11   6        7.52        5.70        7.22 o
   3  11   6      170.68      180.94       14.12 o
   4  11   6       19.90        7.01       18.02 o
  -4  12   6       -0.27        0.54        2.00 o
  -3  12   6      264.99      254.83       14.90 o
  -2  12   6        9.91        0.55       11.22 o
  -1  12   6        2.67        1.46        6.09 o
   0  12   6       25.04       19.69       16.54 o
   1  12   6       26.08       33.56       17.43 o
   2  12   6        5.16        1.81        6.87 o
   3  12   6      515.71      567.83       20.25 o
   4  12   6       -1.83        5.77        4.71 o
  -4  13   6       11.64        5.58       21.00 o
  -3  13   6      490.08      484.05       19.00 o
  -2  13   6       53.16       49.36       10.34 o
  -1  13   6        3.17       10.64        4.55 o
   0  13   6        4.35        1.42        7.12 o
   1  13   6        9.32       11.21        9.58 o
   2  13   6       14.59       14.89       15.09 o
   3  13   6      372.70      389.12       17.51 o
   4  13   6        7.52       10.08       12.74 o
  -4  14   6       -4.47        6.89        9.60 o
  -3  14   6      353.12      359.35       17.55 o
  -2  14   6       25.91       14.98        8.32 o
  -1  14   6       53.17       48.70       10.97 o
   0  14   6        6.74        9.47        7.69 o
   1  14   6       17.66       20.35       14.43 o
   2  14   6       38.40       40.95       13.15 o
   3  14   6       22.06       27.86        6.10 o
   4  14   6       -3.80        1.80        5.49 o
  -4  15   6       13.55        1.81       14.00 o
  -3  15   6        0.45        0.36        0.91 o
  -2  15   6       20.71        8.24       13.24 o
  -1  15   6      713.50      742.40       19.99 o
   0  15   6        2.96        5.95        5.09 o
   1  15   6      220.04      233.82       11.34 o
   2  15   6       12.10        8.66       10.01 o
   3  15   6      133.00      135.40       13.67 o
   4  15   6        7.54        1.06       10.00 o
  -4  16   6       -2.35        0.55        5.09 o
  -3  16   6       93.88       87.52       11.53 o
  -2  16   6        2.62        2.38        5.08 o
  -1  16   6      603.61      625.09       18.52 o
   0  16   6       81.03       76.65        9.27 o
   1  16   6      909.42      947.73       22.86 o
   2  16   6        1.97        0.09        5.76 o
   3  16   6      190.84      188.10       15.10 o
   4  16   6        2.03        4.55        5.89 o
  -4  17   6        7.48        3.55        9.92 o
  -3  17   6      159.35      161.37       16.96 o
  -2  17   6        4.06        0.65        8.20 o
  -1  17   6        0.12        0.12        0.49 o
   0  17   6        5.21        2.43        7.28 o
   1  17   6      510.75      519.64       17.22 o
   2  17   6        7.16        1.05       10.68 o
   3  17   6       74.87       83.88       10.83 o
   4  17   6        1.62        4.53        5.90 o
  -4  18   6       10.61        8.66       13.75 o
  -3  18   6        8.41        8.42       12.60 o
  -2  18   6       17.65       14.85       13.47 o
  -1  18   6      805.52      811.22       21.48 o
   0  18   6       -0.62        0.31        1.31 o
   1  18   6       75.48       74.33        7.43 o
   2  18   6        8.38       13.98       11.03 o
   3  18   6        4.79        4.59        8.97 o
   4  18   6       -0.73        4.56        1.91 o
  -4  19   6       -0.23        2.59        1.68 o
  -3  19   6       -4.18        0.05        8.65 o
  -2  19   6        1.96        1.42        3.43 o
  -1  19   6      779.47      793.30       21.38 o
   0  19   6       -5.21        0.14        6.45 o
   1  19   6      696.74      712.96       19.97 o
   2  19   6       10.24        9.79       11.74 o
   3  19   6        4.46        0.33        9.52 o
   4  19   6       -5.52        5.96       11.73 o
  -4  20   6        5.36        0.61        9.51 o
  -3  20   6        5.39        0.48        9.94 o
  -2  20   6        0.01        0.01        1.68 o
  -1  20   6      179.98      192.31       11.62 o
   0  20   6        6.16        4.70        8.12 o
   1  20   6      565.08      541.17       20.00 o
   2  20   6        9.75        7.19       12.63 o
   3  20   6       -1.83        5.26        3.93 o
   4  20   6        0.30        0.07        2.27 o
  -4  21   6       -1.24        0.26        4.49 o
  -3  21   6       33.89       22.97       12.26 o
  -2  21   6       -1.78        8.12        5.16 o
  -1  21   6        1.93        1.49        5.49 o
   0  21   6       10.18        3.56       11.92 o
   1  21   6       83.64       82.26       11.86 o
   2  21   6       -1.70        1.44        3.82 o
   3  21   6       18.42       12.80       16.62 o
   4  21   6        0.93        0.40        2.40 o
  -4  22   6       -1.67        0.06        5.47 o
  -3  22   6       -1.40        1.66        3.75 o
  -2  22   6        0.78        0.09        1.77 o
  -1  22   6        9.07       13.93       13.04 o
   0  22   6       24.37       31.55       21.77 o
   1  22   6        0.07        1.19        2.05 o
   2  22   6      -15.31        4.21       16.08 o
   3  22   6        6.20        1.52        7.05 o
   4  22   6       10.47        1.68       13.06 o
  -4  23   6        1.01        5.68        4.12 o
  -3  23   6        3.94        0.99        6.75 o
  -2  23   6      -11.27        1.26       15.34 o
  -1  23   6        2.45        7.45        5.58 o
   0  23   6        9.17        4.43       12.97 o
   1  23   6       -0.49        0.22        1.31 o
   2  23   6       -2.25        0.34        6.65 o
   3  23   6        7.79        3.02        9.31 o
   4  23   6        1.99        4.71        7.24 o
  -3  24   6       -8.98        7.53        9.64 o
  -2  24   6        0.59        0.89        1.63 o
  -1  24   6        5.44        5.43        9.35 o
   0  24   6        8.20       10.56        8.14 o
   1  24   6       37.67       28.81       10.81 o
   2  24   6        3.30        3.26        5.78 o
   3  24   6       -1.22        1.32        2.98 o
  -3  25   6        9.73       12.19       16.58 o
  -2  25   6        9.49        7.69       15.88 o
  -1  25   6      141.06      131.97       10.89 o
   0  25   6      -10.78        0.14       12.58 o
   1  25   6      444.35      455.04       18.13 o
   2  25   6        1.16        0.38        3.32 o
   3  25   6        6.26       16.04       12.25 o
  -3  26   6       -2.18        0.02        6.59 o
  -2  26   6        3.99        6.09        9.56 o
  -1  26   6      658.20      681.84       20.44 o
   0  26   6       -2.52        5.74        6.94 o
   1  26   6      357.60      342.92       16.77 o
   2  26   6        1.83       10.88        5.74 o
   3  26   6        0.85        0.10        1.59 o
  -3  27   6        1.73        1.15        5.93 o
  -2  27   6        2.61        5.18        5.59 o
  -1  27   6      148.25      136.28       12.58 o
   0  27   6       17.43        7.84       20.84 o
   1  27   6       34.43       28.47        7.91 o
   2  27   6       -3.43        1.04        9.48 o
   3  27   6      -14.13        1.59       17.17 o
  -3  28   6       53.88       48.27       10.98 o
  -2  28   6        0.13        0.08        2.73 o
  -1  28   6       67.98       59.62        9.76 o
   0  28   6       81.92       65.32       12.36 o
   1  28   6      319.58      302.26       17.50 o
   2  28   6       10.67        2.45        9.95 o
   3  28   6       21.58       16.21       13.30 o
  -3  29   6       57.36       53.77       10.24 o
  -2  29   6        0.14        5.61        1.87 o
  -1  29   6      279.74      268.35       17.13 o
   0  29   6       13.69        3.94       14.18 o
   1  29   6      150.48      175.38       13.16 o
   2  29   6       -1.74        0.19        3.94 o
   3  29   6      108.97      102.00       15.31 o
  -3  30   6       22.15       21.37       26.92 o
  -2  30   6       -0.73        2.13        1.85 o
  -1  30   6       17.29       23.62       17.01 o
   0  30   6        7.81        4.50       12.93 o
   1  30   6        0.82        1.05        1.47 o
   2  30   6       23.96       16.77       25.61 o
   3  30   6       27.36       23.72       36.81 o
  -3  31   6      119.73      122.01       14.59 o
  -2  31   6        9.53        9.60       12.88 o
  -1  31   6        3.42        0.06        7.53 o
   0  31   6       15.14        0.47       14.33 o
   1  31   6       -8.26        0.53        9.49 o
   2  31   6        2.10        4.21        6.76 o
   3  31   6       33.47       45.52       11.93 o
  -3  32   6       47.76       52.53       11.20 o
  -2  32   6        3.59        0.51        5.80 o
  -1  32   6       -1.21        0.78        4.93 o
   0  32   6        4.53        2.51        9.44 o
   1  32   6       20.45        3.60       13.61 o
   2  32   6        2.81        4.80        9.58 o
   3  32   6      133.04      120.62       16.40 o
  -3  33   6       -5.62       12.21        8.17 o
  -2  33   6        6.62       11.98       11.38 o
  -1  33   6       13.11        9.65       11.01 o
   0  33   6        9.75        0.12       17.10 o
   1  33   6      -11.21        4.19       13.62 o
   2  33   6        0.11        2.23        1.58 o
   3  33   6       20.53        6.19       32.62 o
  -2  34   6        6.27        5.25        9.27 o
  -1  34   6        0.00        0.00        1.79 o
   0  34   6      -11.61        0.16        9.34 o
   1  34   6        0.14        5.04        1.63 o
   2  34   6        6.39       10.53        8.91 o
  -2  35   6       13.02        0.41       12.74 o
  -1  35   6       -0.37        1.50        1.80 o
   0  35   6        6.09        0.09        9.33 o
   1  35   6       -4.38        1.34        9.07 o
   2  35   6       -3.31        0.12        7.62 o
  -2  36   6       -3.97        2.46        8.45 o
  -1  36   6        3.41        1.85        7.85 o
   0  36   6      -10.03        0.13       15.01 o
   1  36   6        0.69        0.04        3.01 o
   2  36   6       -0.09        0.01        1.99 o
  -2  37   6       -3.87        1.68        8.78 o
  -1  37   6        7.18       12.10        9.44 o
   0  37   6       -6.45        0.01       14.13 o
   1  37   6       -3.19        2.61        8.51 o
   2  37   6       14.70        2.34       23.39 o
  -2  38   6       10.61        0.80       12.24 o
  -1  38   6       24.47       21.90       27.07 o
   0  38   6       13.47        3.66       19.75 o
   1  38   6       -5.34        9.66       13.47 o
   2  38   6       -3.74        0.36       12.76 o
  -2  39   6        4.28        0.75       10.21 o
  -1  39   6       17.33       18.01       26.63 o
   0  39   6       16.56        0.03       18.39 o
   1  39   6       40.55       44.75       30.09 o
   2  39   6        5.59        1.68       12.58 o
  -1  40   6       21.95       22.69       25.32 o
   0  40   6       10.99        5.11       14.91 o
   1  40   6        0.02        0.00        4.69 o
  -1  41   6       69.69       56.12       16.13 o
   0  41   6       -2.39        0.32        8.18 o
   1  41   6       27.39       17.26       14.74 o
  -1  42   6       49.22       52.84       13.34 o
   0  42   6       21.50        0.02       31.58 o
   1  42   6       54.15       77.50       19.03 o
   0  43   6       -2.48        1.54       10.43 o
  -3   1   7        4.63        2.26        9.15 o
  -2   1   7        1.29        4.33        5.41 o
  -1   1   7       -1.28        3.20        3.53 o
   0   1   7       -1.15        3.42        3.45 o
   1   1   7       -9.08        4.17       11.02 o
   2   1   7       -9.51        6.60        9.93 o
   3   1   7        0.75        0.23        1.92 o
  -3   2   7       11.66        2.37       15.75 o
  -2   2   7       -1.49        0.32        3.99 o
  -1   2   7       15.01       13.43       16.09 o
   0   2   7        9.13        0.99       11.32 o
   1   2   7       10.50       19.95       10.79 o
   2   2   7        4.46        0.78        6.80 o
   3   2   7       -1.95        2.41        4.68 o
  -3   3   7        4.84        2.34        7.62 o
  -2   3   7       -1.17        0.43        4.85 o
  -1   3   7        5.73        0.90        8.62 o
   0   3   7       -3.82        1.68        5.42 o
   1   3   7        8.46        3.88        9.12 o
   2   3   7       -0.08        0.00        1.76 o
   3   3   7       -4.73        2.27        6.50 o
  -3   4   7        7.55        1.17       14.11 o
  -2   4   7       23.66        1.27       17.22 o
  -1   4   7       33.87       41.60       10.39 o
   0   4   7      -12.09        0.30       11.92 o
   1   4   7       40.36       42.02       10.78 o
   2   4   7        4.34        0.60        6.81 o
   3   4   7        1.84        1.39        5.40 o
  -3   5   7        0.97        8.76        2.08 o
  -2   5   7        5.39       18.70       10.60 o
  -1   5   7       22.40       35.98       21.27 o
   0   5   7       -3.11        2.91        4.96 o
   1   5   7       37.62       53.05        9.99 o
   2   5   7       17.37       24.42       16.28 o
   3   5   7       12.65       13.79       13.98 o
  -3   6   7        4.82        1.27        8.19 o
  -2   6   7        2.58        2.95        8.22 o
  -1   6   7       -5.22        3.61        8.65 o
   0   6   7        9.89        0.15       10.62 o
   1   6   7        3.31        5.15        6.06 o
   2   6   7       12.44       16.87       14.94 o
   3   6   7        9.13        3.33       14.18 o
  -3   7   7       14.44       17.78       18.79 o
  -2   7   7      140.98      121.00       15.86 o
  -1   7   7        0.41        4.63        1.16 o
   0   7   7        2.01        0.06        3.51 o
   1   7   7       -7.37        1.13        9.27 o
   2   7   7      119.64      122.46       11.49 o
   3   7   7       -4.45        8.27        6.95 o
  -3   8   7       -1.42        7.21        4.17 o
  -2   8   7      287.63      275.75       18.90 o
  -1   8   7       11.95        9.90       12.86 o
   0   8   7       -7.50        0.18        7.72 o
   1   8   7       -3.00        7.95        4.92 o
   2   8   7      302.36      314.87       15.32 o
   3   8   7        6.17        4.63       10.99 o
  -3   9   7       12.46        3.96       11.41 o
  -2   9   7       92.82       80.99       13.01 o
  -1   9   7        0.43        3.77        1.85 o
   0   9   7      -13.71        0.00       11.89 o
   1   9   7        0.15        0.02        1.34 o
   2   9   7      186.60      194.79       15.11 o
   3   9   7       11.93        4.38       16.05 o
  -3  10   7       18.27       13.40       25.50 o
  -2  10   7      281.44      243.20       20.44 o
  -1  10   7      -11.05        1.67       10.88 o
   0  10   7        4.40        0.17        6.96 o
   1  10   7        5.70        3.65        7.75 o
   2  10   7       86.69       91.45       10.81 o
   3  10   7       16.74       16.70       17.23 o
  -3  11   7       39.57       25.36       12.79 o
  -2  11   7       38.56       24.33       17.30 o
  -1  11   7        8.91        1.77        9.96 o
   0  11   7        3.63        1.92        6.33 o
   1  11   7       -4.49        0.59        6.58 o
   2  11   7       11.14       16.87       17.41 o
   3  11   7       25.72       24.98       23.24 o
  -3  12   7        0.81        0.66        2.28 o
  -2  12   7      580.71      561.84       25.30 o
  -1  12   7       59.74       42.76       10.52 o
   0  12   7       19.30        0.69       19.42 o
   1  12   7       50.72       45.35       10.28 o
   2  12   7      271.74      282.54       15.51 o
   3  12   7       -2.11        0.87        4.50 o
  -3  13   7        0.66        0.78        2.58 o
  -2  13   7       70.92       63.18       11.68 o
  -1  13   7        7.52        7.71       10.68 o
   0  13   7        5.56        3.54        9.35 o
   1  13   7        1.43        1.69        4.30 o
   2  13   7      199.62      207.09       15.25 o
   3  13   7        7.61        0.30        9.35 o
  -3  14   7       53.27       40.89       11.30 o
  -2  14   7      499.56      528.74       23.45 o
  -1  14   7       -6.26        1.92       11.34 o
   0  14   7      -18.00        1.64       11.46 o
   1  14   7        4.79        2.75        6.57 o
   2  14   7      621.78      639.85       22.14 o
   3  14   7       57.71       51.11       13.96 o
  -3  15   7       -0.05        0.00        2.18 o
  -2  15   7      409.32      417.30       22.23 o
  -1  15   7       14.51        6.68       18.00 o
   0  15   7       -5.91        2.42        8.96 o
   1  15   7        7.13       16.25       11.31 o
   2  15   7      362.82      370.81       17.53 o
   3  15   7       14.66        1.43       18.09 o
  -3  16   7        3.33        8.52        7.25 o
  -2  16   7        0.63        1.24        3.12 o
  -1  16   7       29.49       15.10       24.28 o
   0  16   7       -4.19        3.62        8.45 o
   1  16   7       16.07        9.80       14.22 o
   2  16   7       17.34        9.70       14.01 o
   3  16   7       -1.33       11.60        3.68 o
  -3  17   7       -4.22        1.56       10.68 o
  -2  17   7       35.45       26.68        9.64 o
  -1  17   7       27.92       27.65       27.01 o
   0  17   7       -3.33        1.04        6.75 o
   1  17   7        5.37        6.47        7.19 o
   2  17   7       40.06       48.33       13.41 o
   3  17   7       -3.76        5.41        6.70 o
  -3  18   7       12.70        9.05       17.01 o
  -2  18   7       -7.95        4.06       11.11 o
  -1  18   7        4.61        5.55        7.81 o
   0  18   7        9.23        3.44       12.78 o
   1  18   7       13.08        8.45       15.82 o
   2  18   7        0.02        0.00        2.12 o
   3  18   7        8.51        9.49       15.33 o
  -3  19   7      -10.46        1.82       18.46 o
  -2  19   7       18.62       11.97       24.74 o
  -1  19   7       21.39       25.01       18.18 o
   0  19   7       25.69       30.80       28.52 o
   1  19   7       38.35       27.60        9.62 o
   2  19   7        2.10        4.33        6.35 o
   3  19   7        0.19        0.01        1.59 o
  -3  20   7       30.01       29.27       15.30 o
  -2  20   7        9.49        4.14       12.06 o
  -1  20   7        5.58        1.31       11.65 o
   0  20   7       17.60        0.08       23.44 o
   1  20   7       -4.04        1.35        7.15 o
   2  20   7        2.00       12.78        6.08 o
   3  20   7       28.38       31.08       26.06 o
  -3  21   7        4.43        0.12        8.84 o
  -2  21   7       12.93       15.70       16.43 o
  -1  21   7       30.60       33.73       10.54 o
   0  21   7     1887.27     2040.16       43.53 o
   1  21   7       33.64       32.59       11.84 o
   2  21   7       16.46       18.20       18.36 o
   3  21   7        3.74        1.25        9.08 o
  -2  22   7        0.12        0.00        2.78 o
  -1  22   7        8.91       16.81       12.44 o
   0  22   7       72.67       45.63       13.11 o
   1  22   7       22.54       23.90       23.95 o
   2  22   7       -1.23        1.20        3.73 o
  -2  23   7       13.07        8.04       14.70 o
  -1  23   7       31.61       22.06       12.93 o
   0  23   7      745.23      764.49       24.71 o
   1  23   7       19.03       19.46       21.94 o
   2  23   7        6.40        4.28        9.20 o
  -2  24   7        9.19        7.44        9.31 o
  -1  24   7        5.16       12.48       10.06 o
   0  24   7       13.65        6.65       19.83 o
   1  24   7        2.72       14.52        6.66 o
   2  24   7       10.43       15.04        8.32 o
  -2  25   7       -0.85        4.43        1.98 o
  -1  25   7       13.14       11.08       16.02 o
   0  25   7      369.37      356.18       20.41 o
   1  25   7       33.64       31.64       10.00 o
   2  25   7       -1.17        1.74        3.65 o
  -2  26   7        6.82        0.61       12.80 o
  -1  26   7       19.74        1.49       24.33 o
   0  26   7       -5.23        1.96        6.79 o
   1  26   7       -0.26        0.02        1.93 o
   2  26   7        1.40        0.04        5.14 o
  -2  27   7        1.12        8.00        4.82 o
  -1  27   7       32.42       30.54       17.64 o
   0  27   7        6.31        9.83       10.77 o
   1  27   7        9.03       14.71       14.95 o
   2  27   7        4.50       14.95       10.72 o
  -2  28   7       -0.53        3.00        2.37 o
  -1  28   7       14.04       14.01       17.68 o
   0  28   7       10.18        0.76       14.60 o
   1  28   7        0.52       17.84        2.46 o
   2  28   7       13.59       18.59       17.84 o
  -2  29   7       27.89       24.76       27.68 o
  -1  29   7      -23.02        0.53       28.73 o
   0  29   7       11.61        9.90       19.51 o
   1  29   7        0.88        0.01        3.23 o
   2  29   7       19.00       15.27       25.21 o
  -1  30   7        5.32        9.82       10.54 o
   0  30   7       -0.65        0.30        3.22 o
   1  30   7       -4.96        3.90        5.51 o
  -1  31   7        9.46        4.26       15.61 o
   0  31   7       20.54       10.74       39.28 o
   1  31   7       -4.35        2.70        8.24 o
  -1  32   7        2.73        5.50        9.95 o
   0  32   7       -1.91        0.12        8.10 o
   1  32   7        7.81        3.13       15.63 o
  -1  33   7       12.49        0.86       25.89 o
   0  33   7       -6.98        0.24       11.67 o
   1  33   7       -7.97        2.28       14.40 o
   0  34   7        6.88        0.17       16.92 o
  -2   0   8       -2.44        0.16        7.93 o
  -1   0   8        4.94       16.42       19.28 o
   0   0   8      445.49      504.59       24.16 o
   1   0   8       38.18       22.24       20.64 o
   2   0   8       -4.46        1.61        6.84 o
  -2   1   8      -10.08        0.26       11.07 o
  -1   1   8       -1.95        2.58        7.60 o
   0   1   8       99.76      100.78       10.85 o
   1   1   8       25.56       10.71       20.35 o
   2   1   8       -2.36        0.06        5.72 o
  -2   2   8       12.95        2.70       20.41 o
  -1   2   8       24.04       26.34       24.71 o
   0   2   8       38.27       31.60        9.23 o
   1   2   8        2.61        7.15        6.42 o
   2   2   8       -8.13        1.86       11.76 o
  -2   3   8       -0.56        0.06        2.61 o
  -1   3   8       11.06        9.86       17.20 o
   0   3   8       17.49       12.52       20.14 o
   1   3   8       31.45       38.53       24.90 o
   2   3   8        0.84        3.78        1.91 o
  -2   4   8       17.19        3.99       22.64 o
  -1   4   8        0.08        0.04        2.25 o
   0   4   8       38.07       19.37       11.91 o
   1   4   8       47.38       46.66       13.33 o
   2   4   8      -12.22        5.13       15.64 o
  -2   5   8        0.03        0.00        3.10 o
  -1   5   8       33.29       24.13       13.25 o
   0   5   8        0.92        0.24        1.78 o
   1   5   8       20.19       19.74       13.78 o
   2   5   8       14.31        6.99       17.72 o
  -2   6   8       46.15       46.28       15.58 o
  -1   6   8       78.85       66.25       14.43 o
   0   6   8        4.93        7.80        5.83 o
   1   6   8        7.11        7.86       12.35 o
   2   6   8        8.67        8.02       13.43 o
  -2   7   8       15.13       17.45       12.35 o
  -1   7   8       21.16       16.44       22.76 o
   0   7   8        3.78        0.80        9.26 o
   1   7   8       23.50       36.59       18.53 o
   2   7   8      115.61      127.53       14.40 o
  -2   8   8       75.17       76.89       14.94 o
  -1   8   8        0.00        0.00        1.77 o
   0   8   8        3.15        0.69        9.66 o
   1   8   8       18.24       12.81       18.91 o
   2   8   8       20.14       14.82        7.24 o
  -2   9   8       98.34      111.17       15.62 o
  -1   9   8        7.84       10.00       12.20 o
   0   9   8        4.82        0.65        8.21 o
   1   9   8        0.08        0.06        1.87 o
   2   9   8       57.92       76.95       11.28 o
  -1  10   8       -1.79        6.94        4.03 o
   0  10   8       -4.36        3.35        6.69 o
   1  10   8        0.35        0.27        1.46 o
  -1  11   8        0.11        0.25        1.89 o
   0  11   8        6.42        6.10       14.13 o
   1  11   8       39.34       25.61       11.43 o
  -1  12   8        6.49        6.18       10.33 o
   0  12   8       -5.85        4.19        9.96 o
   1  12   8       -1.53        0.31        4.02 o
  -1  13   8       10.31       27.35       11.69 o
   0  13   8       -2.81        0.20        4.89 o
   1  13   8       -1.09        5.43        4.35 o
  -1  14   8       11.02       18.13       15.56 o
   0  14   8        3.50        2.95        8.64 o
   1  14   8       30.89       19.87        9.55 o
  -1  15   8       46.44       48.92       10.07 o
   0  15   8       13.07       10.69       16.63 o
   1  15   8      157.25      159.51       14.83 o
  -1  16   8      365.58      344.48       20.17 o
   0  16   8       27.41       21.45       30.15 o
   1  16   8      104.86       87.21       11.99 o
  -1  17   8      288.75      269.30       19.43 o
   0  17   8        0.29        1.88        2.18 o
   1  17   8       27.44       29.43        7.35 o
  -1  18   8        0.47        0.48        0.85 o
   0  18   8      -10.72        1.69       13.37 o
   1  18   8      386.06      347.86       24.21 o
   0  19   8       11.81        2.02       12.87 o
   0  20   8        0.63        5.97        2.39 o
