# Supplementary material for: Competition between hydrogen bonding and dispersion interactions in the crystal structures of the primary amines
Source: Royal Society of Chemistry journal article supplement (doi:10.1039/c3ce42639d), 2014-01-01
Supplement: c3ce42639d8.fcf [file c3ce42639d8.fcf]

data_octylamine 
#  Octylamine in Pca2(1) at 150K                     
_audit_creation_date        "11-02-03"
_audit_creation_method      CRYSTALS 

_cell_length_a                    7.0313(5)
_cell_angle_alpha                 90
_cell_length_b                    22.3083(13)
_cell_angle_beta                  90
_cell_length_c                    5.5831(3)
_cell_angle_gamma                 90

# NOTE FO on scale of Fc,      4.41268
# Status flags: 
#    o - used in refinement 
#    < - excluded by I/sigmaI cutoff 
#    x - excluded for another reason  

loop_
_refln_index_h
_refln_index_k
_refln_index_l
_refln_F_squared_meas
_refln_F_squared_calc
_refln_F_squared_sigma
_refln_observed_status
   2   0   0    19468.34    20807.49      344.79 o
   4   0   0     2021.87     1904.79       35.72 o
   6   0   0       23.13       14.06        1.27 o
   8   0   0      179.95      169.23        8.29 o
   1   1   0        4.49        4.88        0.19 o
   2   1   0       59.63       55.93        0.68 o
   3   1   0        5.47        4.86        0.41 o
   4   1   0        0.78        0.45        0.04 o
   5   1   0        0.94        0.67        0.04 o
   6   1   0        1.32        1.19        0.30 o
   7   1   0        2.39        0.16        0.41 o
   8   1   0        1.12        1.91        0.37 o
   0   2   0      249.56      227.96        4.18 o
   1   2   0       16.48       17.38        1.43 o
   2   2   0       51.10       57.44        1.26 o
   3   2   0       25.75       24.84        0.45 o
   4   2   0       37.62       33.52        1.08 o
   5   2   0        7.25        6.86        0.95 o
   6   2   0        5.27        4.38        0.81 o
   7   2   0        0.56        0.47        0.09 o
   8   2   0        3.77        2.93        1.20 o
   0   3   0      253.76      227.79        4.22 o
   1   3   0       28.04       28.69        0.47 o
   2   3   0       43.23       41.65        0.58 o
   3   3   0       37.62       36.13        0.54 o
   4   3   0        0.56        0.20        0.04 o
   5   3   0       10.38        8.74        1.71 o
   6   3   0        2.67        3.16        0.43 o
   7   3   0        1.12        0.07        0.19 o
   8   3   0        2.39        1.99        0.68 o
   0   4   0      265.13      244.70        4.31 o
   1   4   0        2.52        3.06        0.14 o
   2   4   0       51.10       60.55        1.26 o
   3   4   0       13.09       12.40        1.60 o
   4   4   0       18.70       17.08        2.29 o
   5   4   0        3.12        2.54        0.31 o
   6   4   0        2.39        1.98        0.41 o
   7   4   0        0.38        0.26        0.04 o
   8   4   0        0.38        0.22        0.09 o
   0   5   0      225.09      206.21        3.97 o
   1   5   0       40.94       41.86        0.56 o
   2   5   0       31.90       30.00        0.50 o
   3   5   0       53.01       51.71        1.29 o
   4   5   0        0.56        0.91        0.04 o
   5   5   0       12.46       12.30        1.87 o
   6   5   0        6.78        7.71        1.15 o
   7   5   0        1.99        0.77        0.37 o
   8   5   0        2.12        4.09        0.64 o
   0   6   0      290.12      244.65        6.01 o
   1   6   0        2.12        2.16        0.13 o
   2   6   0       78.67       92.53        0.78 o
   3   6   0        0.56        0.07        0.04 o
   4   6   0       22.71       24.85        0.84 o
   5   6   0        0.38        0.65        0.04 o
   6   6   0        7.25        6.61        1.19 o
   7   6   0        1.99        1.01        0.37 o
   8   6   0        1.12        0.65        0.37 o
   0   7   0      242.64      219.93        4.12 o
   1   7   0       85.05       87.11        1.63 o
   2   7   0       44.40       43.26        1.18 o
   3   7   0       97.70      106.30        1.74 o
   4   7   0        0.19        0.04        0.04 o
   5   7   0       30.91       30.60        0.98 o
   6   7   0        8.23        7.78        1.27 o
   7   7   0        4.87        4.71        1.17 o
   8   7   0        7.25        5.31        2.61 <
   0   8   0      514.44      403.80       10.01 o
   1   8   0       26.65       23.58        0.46 o
   2   8   0      169.45      173.28        2.30 o
   3   8   0       17.21       18.40        2.20 o
   4   8   0       38.16       43.31        1.09 o
   5   8   0       27.11       28.01        1.38 o
   6   8   0        9.54        9.69        1.91 o
   7   8   0       25.31       21.98        1.78 o
   8   8   0        1.99        0.29        0.62 o
   0   9   0     1612.46     1363.11       31.89 o
   1   9   0      822.68      756.46       10.13 o
   2   9   0      615.00      577.71        8.75 o
   3   9   0     1012.22     1038.19       14.04 o
   4   9   0       95.96       97.26        1.73 o
   5   9   0      595.46      630.46        8.61 o
   6   9   0        4.49        5.21        0.75 o
   7   9   0      268.01      268.36        5.78 o
   8   9   0        0.38        1.24        0.09 o
   0  10   0      948.67      734.88       19.03 o
   1  10   0      940.53      841.26       13.53 o
   2  10   0      410.23      362.48        5.36 o
   3  10   0     1233.76     1255.61       18.60 o
   4  10   0       63.09       69.83        1.40 o
   5  10   0      765.49      784.25       12.21 o
   6  10   0        2.39        3.11        0.41 o
   7  10   0      335.35      325.00        8.08 o
   8  10   0        3.94        1.97        1.23 o
   0  11   0      396.06      301.08        8.78 o
   1  11   0       90.01       77.21        1.67 o
   2  11   0      114.98      108.91        1.89 o
   3  11   0      116.88      116.19        1.91 o
   4  11   0        3.27        4.24        0.32 o
   5  11   0      120.73      120.14        2.91 o
   6  11   0        9.00        7.79        2.12 o
   7  11   0       84.24       78.59        2.43 o
   8  11   0       12.46       12.61        4.36 <
   0  12   0       75.57       55.83        2.30 o
   1  12   0       10.09       11.10        1.12 o
   2  12   0        7.98       10.69        1.00 o
   3  12   0       23.99       24.75        0.86 o
   4  12   0        0.94        0.55        0.04 o
   5  12   0        2.67        3.38        0.43 o
   6  12   0       10.95        9.33        3.21 o
   7  12   0        0.56        0.95        0.09 o
   8  12   0        8.48        8.84        3.08 <
   0  13   0       52.37       44.15        1.92 o
   1  13   0        3.27        3.14        0.32 o
   2  13   0       17.95       18.84        2.99 o
   3  13   0        4.68        5.82        0.57 o
   4  13   0        0.19        0.17        0.04 o
   5  13   0        7.25        7.29        1.19 o
   6  13   0        2.52        1.96        0.56 o
   7  13   0        5.89        4.24        1.71 o
   0  14   0       71.78       64.93        2.24 o
   1  14   0        1.32        0.98        0.10 o
   2  14   0       20.26       21.99        0.79 o
   3  14   0        1.99        2.56        0.25 o
   4  14   0        0.38        0.45        0.04 o
   5  14   0        0.38        0.19        0.04 o
   6  14   0        1.53        1.77        0.33 o
   7  14   0        1.53        0.39        0.44 o
   0  15   0       35.49       29.67        1.58 o
   1  15   0        0.38        0.00        0.04 o
   2  15   0       13.09       15.47        2.24 o
   3  15   0        0.38        0.07        0.04 o
   4  15   0        2.52        1.81        0.42 o
   5  15   0        0.00        0.52        0.04 <
   6  15   0        0.56        0.17        0.09 o
   7  15   0        3.12        1.27        0.93 o
   0  16   0       55.61       46.34        1.97 o
   1  16   0        0.38        0.02        0.04 o
   2  16   0       19.47       19.46        1.17 o
   3  16   0        0.00        0.01        0.04 <
   4  16   0        1.53        2.03        0.22 o
   5  16   0        0.38        0.03        0.04 o
   6  16   0        0.00        0.00        0.04 <
   7  16   0        1.12        0.19        0.28 o
   0  17   0       48.61       47.66        1.85 o
   1  17   0        0.78        0.18        0.04 o
   2  17   0       19.86       21.60        0.79 o
   3  17   0        0.94        0.49        0.09 o
   4  17   0        2.39        2.94        0.41 o
   5  17   0        2.39        0.00        0.41 o
   6  17   0        1.12        0.34        0.28 o
   7  17   0        2.39        0.98        0.68 o
   0  18   0       33.42       27.85        1.53 o
   1  18   0        0.38        0.50        0.04 o
   2  18   0       10.38       11.50        1.99 o
   3  18   0        1.53        1.53        0.22 o
   4  18   0        0.78        1.00        0.09 o
   5  18   0        0.78        0.91        0.09 o
   6  18   0        1.75        0.10        0.47 o
   0  19   0     1271.24     1108.84       25.17 o
   1  19   0       38.16       40.07        1.64 o
   2  19   0      435.64      473.68        9.21 o
   3  19   0      206.94      171.68        3.81 o
   4  19   0       71.78       79.20        2.24 o
   5  19   0      209.48      184.77        3.83 o
   6  19   0        2.67        1.74        0.72 o
   0  20   0       36.01       26.24        2.12 o
   1  20   0        1.12        1.16        0.19 o
   2  20   0        9.00        9.61        1.85 o
   3  20   0        4.87        3.91        0.78 o
   4  20   0        1.12        0.16        0.19 o
   5  20   0        1.99        1.76        0.37 o
   6  20   0        3.12        1.26        0.93 o
   0  21   0       96.83       88.06        3.47 o
   1  21   0       16.48       13.26        3.22 o
   2  21   0       44.99       52.43        1.78 o
   3  21   0       61.00       54.84        2.07 o
   4  21   0       21.06       24.90        1.22 o
   5  21   0       55.61       51.04        1.97 o
   0  22   0       10.38        5.45        2.84 o
   1  22   0        0.56        1.37        0.04 o
   2  22   0        1.53        1.83        0.22 o
   3  22   0        4.12        5.38        0.90 o
   4  22   0        0.38        0.09        0.04 o
   5  22   0        5.06        3.46        1.39 o
   0  23   0       24.86       23.80        2.20 o
   1  23   0        2.12        2.57        0.39 o
   2  23   0       13.41       14.00        2.59 o
   3  23   0       13.09       11.72        3.19 o
   4  23   0        3.43        3.70        0.65 o
   5  23   0        8.74        8.72        2.35 o
   0  24   0        4.12        5.37        1.25 o
   1  24   0        2.12        1.00        0.39 o
   2  24   0        2.39        2.51        0.41 o
   3  24   0        3.12        3.87        0.62 o
   4  24   0        1.12        0.08        0.19 o
   0  25   0       13.74       10.04        5.56 <
   1  25   0        0.78        0.49        0.09 o
   2  25   0        7.48        6.35        1.69 o
   3  25   0        1.53        2.31        0.33 o
   4  25   0        1.32        1.46        0.30 o
   0  26   0        9.27        5.98        3.76 <
   1  26   0        1.12        1.22        0.19 o
   2  26   0        4.87        3.61        1.17 o
   3  26   0        5.06        4.58        1.19 o
   0  27   0       10.95        6.69        4.67 <
   1  27   0        0.56        0.24        0.09 o
   2  27   0        5.47        3.97        1.24 o
   0  28   0       64.50       48.88        4.25 o
   2   0   1      137.77      142.82        2.07 o
   4   0   1       48.00       52.56        1.22 o
   6   0   1       16.48       16.85        3.22 o
   8   0   1       14.74       14.03        7.11 <
   1   1   1     1594.79     1698.13       14.10 o
   2   1   1      122.67      127.26        0.98 o
   3   1   1      153.75      152.76        2.19 o
   4   1   1       66.64       68.32        0.72 o
   5   1   1       21.06       15.53        0.41 o
   6   1   1       31.90       33.41        1.00 o
   7   1   1       10.09       10.04        1.68 o
   8   1   1       12.15       13.01        3.08 o
   1   2   1     7215.50     7928.59       82.46 o
   2   2   1      371.85      408.04        3.40 o
   3   2   1      772.83      750.96        7.36 o
   4   2   1      203.15      212.77        2.52 o
   5   2   1       90.01       69.78        1.67 o
   6   2   1       74.04       66.64        1.52 o
   7   2   1       17.95       20.40        3.74 o
   8   2   1        9.82        8.82        2.21 o
   1   3   1     3559.25     3803.26       31.59 o
   2   3   1      260.84      277.98        2.85 o
   3   3   1      424.66      428.30        3.64 o
   4   3   1      145.12      151.25        1.06 o
   5   3   1       60.32       52.65        0.69 o
   6   3   1       47.39       48.89        1.22 o
   7   3   1        1.75        2.66        0.23 o
   8   3   1        5.47        6.41        1.03 o
   1   4   1       44.40       44.70        0.59 o
   2   4   1      104.80      110.16        0.90 o
   3   4   1        1.53        2.14        0.11 o
   4   4   1       46.78       45.61        0.60 o
   5   4   1        1.32        0.26        0.10 o
   6   4   1       22.29       20.50        0.83 o
   7   4   1        1.12        0.21        0.19 o
   8   4   1        2.67        2.60        0.58 o
   1   5   1      597.62      614.42        6.47 o
   2   5   1      120.73      129.51        0.97 o
   3   5   1       56.27       56.91        0.66 o
   4   5   1       53.01       56.65        0.64 o
   5   5   1        1.32        1.45        0.10 o
   6   5   1       16.84       16.05        2.54 o
   7   5   1        1.53        1.65        0.22 o
   8   5   1        2.39        2.18        0.41 o
   1   6   1       27.11       28.11        0.46 o
   2   6   1      111.22      108.37        0.93 o
   3   6   1        0.78        1.77        0.04 o
   4   6   1       56.94       60.83        0.67 o
   5   6   1        3.43        4.33        0.49 o
   6   6   1       44.99       45.06        1.18 o
   7   6   1        6.55        5.41        1.13 o
   8   6   1       15.08       13.76        4.11 o
   1   7   1      260.84      250.33        2.85 o
   2   7   1      755.76      743.45        7.28 o
   3   7   1       14.07       14.25        0.99 o
   4   7   1      390.81      413.69        3.49 o
   5   7   1        4.49        3.80        0.56 o
   6   7   1      245.39      253.72        4.15 o
   7   7   1        8.48        9.73        1.29 o
   8   7   1       74.04       69.12        2.28 o
   1   8   1       16.12       17.19        1.42 o
   2   8   1      837.94      812.84        7.66 o
   3   8   1        2.12        1.98        0.39 o
   4   8   1      448.63      481.52        3.74 o
   5   8   1        6.11        7.25        0.65 o
   6   8   1      294.65      298.99        4.54 o
   7   8   1        6.33        5.38        1.11 o
   8   8   1       81.83       72.79        2.40 o
   1   9   1       71.03       68.34        0.74 o
   2   9   1      275.28      246.71        2.93 o
   3   9   1        0.56        0.44        0.04 o
   4   9   1      168.31      165.13        2.29 o
   5   9   1       10.95       10.85        1.75 o
   6   9   1      117.84      118.65        1.92 o
   7   9   1       14.07       14.00        2.98 o
   8   9   1       33.93       34.58        1.54 o
   1  10   1        6.55        6.88        0.45 o
   2  10   1       31.90       33.90        0.50 o
   3  10   1       12.78       12.65        0.95 o
   4  10   1       21.47       21.90        0.41 o
   5  10   1       17.21       16.39        2.93 o
   6  10   1       19.47       20.85        0.78 o
   7  10   1        7.48        6.32        1.21 o
   8  10   1        4.49        6.19        1.12 o
   1  11   1      506.46      499.05        3.97 o
   2  11   1      210.76      204.40        2.56 o
   3  11   1      114.98      114.93        1.89 o
   4  11   1      130.62      137.00        2.02 o
   5  11   1       11.54       10.29        1.80 o
   6  11   1      101.22      104.82        1.78 o
   7  11   1        3.43        3.84        0.49 o
   8  11   1       28.04       26.95        1.87 o
   1  12   1      962.31      935.91        8.21 o
   2  12   1      233.11      229.58        2.69 o
   3  12   1      188.33      193.45        2.42 o
   4  12   1      158.16      165.30        2.22 o
   5  12   1        7.98        9.52        1.00 o
   6  12   1      129.61      127.71        2.01 o
   7  12   1        9.54        9.06        1.91 o
   1  13   1      144.06      136.38        1.06 o
   2  13   1       68.09       71.41        0.73 o
   3  13   1       28.04       28.52        0.93 o
   4  13   1       55.61       57.21        1.32 o
   5  13   1        1.32        0.93        0.20 o
   6  13   1       44.40       42.62        1.18 o
   7  13   1        4.68        5.10        0.95 o
   1  14   1       77.11       77.93        1.55 o
   2  14   1       10.38       10.08        1.14 o
   3  14   1       16.84       16.35        5.43 o
   4  14   1        7.73        7.08        0.98 o
   5  14   1        1.75        2.25        0.23 o
   6  14   1        0.94        1.32        0.04 o
   7  14   1        0.78        0.86        0.09 o
   1  15   1       21.88       20.97        0.41 o
   2  15   1       25.31       26.95        0.89 o
   3  15   1        5.06        4.86        0.60 o
   4  15   1       19.08       22.18        3.08 o
   5  15   1        0.56        0.66        0.04 o
   6  15   1        7.48        7.88        1.21 o
   7  15   1        0.94        0.37        0.09 o
   1  16   1      125.62      126.37        1.98 o
   2  16   1        6.33        5.91        0.67 o
   3  16   1       28.98       31.74        1.90 o
   4  16   1        6.33        6.66        0.67 o
   5  16   1        3.27        4.77        0.32 o
   6  16   1        5.47        5.15        0.83 o
   7  16   1        1.12        1.15        0.19 o
   1  17   1      422.84      410.10        3.63 o
   2  17   1       20.66       19.32        0.80 o
   3  17   1       92.54      101.32        1.70 o
   4  17   1       25.31       24.56        0.89 o
   5  17   1        7.48        8.40        1.21 o
   6  17   1       17.57       15.55        3.33 o
   1  18   1      353.37      341.44        3.32 o
   2  18   1       16.48       16.94        2.51 o
   3  18   1       87.51      104.39        1.65 o
   4  18   1       19.47       19.85        3.12 o
   5  18   1       10.66       11.95        1.73 o
   6  18   1        7.48        8.14        1.45 o
   1  19   1       99.45       98.47        1.76 o
   2  19   1       17.21       14.22        2.93 o
   3  19   1       32.40       35.97        1.00 o
   4  19   1       17.21       15.75        2.93 o
   5  19   1        5.47        7.62        0.83 o
   6  19   1        3.43        4.28        0.49 o
   1  20   1        2.12        3.70        0.26 o
   2  20   1       10.95        9.57        1.46 o
   3  20   1        1.32        0.95        0.20 o
   4  20   1       20.66       18.03        0.80 o
   5  20   1        0.56        0.29        0.04 o
   6  20   1       17.95       16.70        4.49 o
   1  21   1      143.00      159.31        3.17 o
   2  21   1       62.39       59.19        1.39 o
   3  21   1       38.16       41.51        1.09 o
   4  21   1      112.16       96.64        1.87 o
   5  21   1        1.32        2.61        0.20 o
   1  22   1       53.66       62.12        1.29 o
   2  22   1       48.61       42.42        1.23 o
   3  22   1       15.42       17.95        2.43 o
   4  22   1       79.45       69.89        1.57 o
   5  22   1        1.99        2.36        0.37 o
   1  23   1        1.99        2.30        0.25 o
   2  23   1        6.55        6.34        1.13 o
   3  23   1        0.78        0.31        0.04 o
   4  23   1       10.95       11.11        2.04 o
   1  24   1        1.32        0.81        0.20 o
   2  24   1        1.99        2.06        0.25 o
   3  24   1        0.94        0.15        0.04 o
   4  24   1        2.96        2.63        0.46 o
   1  25   1        2.12        1.03        0.64 o
   2  25   1        1.75        1.31        0.23 o
   3  25   1        0.78        0.04        0.09 o
   1  26   1        9.82        7.33        1.94 o
   2  26   1        7.73        6.41        1.23 o
   3  26   1        6.11        6.22        0.87 o
   1  27   1       49.85       47.19        1.87 o
   2  27   1       18.32       15.55        4.53 o
   0   0   2      273.82      299.03        5.84 o
   2   0   2       83.43       88.60        1.61 o
   4   0   2        6.11        6.22        0.65 o
   6   0   2        0.94        0.89        0.09 o
   8   0   2        3.43        1.86        0.98 o
   0   1   2      593.31      624.70        8.60 o
   1   1   2        1.99        1.97        0.12 o
   2   1   2      177.59      187.07        2.35 o
   3   1   2        2.96        3.19        0.30 o
   4   1   2       16.12       16.14        1.77 o
   5   1   2        2.12        1.51        0.26 o
   6   1   2        0.78        0.81        0.04 o
   7   1   2        1.32        0.40        0.20 o
   8   1   2        0.94        0.16        0.09 o
   0   2   2      287.12      305.20        4.49 o
   1   2   2        0.78        0.76        0.04 o
   2   2   2       74.80       74.04        0.76 o
   3   2   2        2.96        3.39        0.30 o
   4   2   2        3.43        2.54        0.33 o
   5   2   2        2.96        2.11        0.46 o
   6   2   2        1.99        1.57        0.25 o
   7   2   2        4.49        4.09        0.75 o
   8   2   2        5.47        5.37        1.24 o
   0   3   2     2356.08     2376.24       29.99 o
   1   3   2       91.69       93.47        0.85 o
   2   3   2      532.61      534.89        6.11 o
   3   3   2      148.33      155.09        2.15 o
   4   3   2       47.39       41.27        1.22 o
   5   3   2      104.80      113.64        1.81 o
   6   3   2        2.96        3.37        0.30 o
   7   3   2       64.50       62.41        2.13 o
   8   3   2       28.04       27.78        1.40 o
   0   4   2     2138.59     2033.84       28.57 o
   1   4   2      187.12      195.29        2.41 o
   2   4   2      459.92      436.21        3.79 o
   3   4   2      348.41      376.73        4.94 o
   4   4   2       58.95       44.79        1.36 o
   5   4   2      242.64      264.48        2.75 o
   6   4   2        8.23        7.87        1.27 o
   7   4   2      131.63      121.89        2.03 o
   8   4   2       37.08       35.74        1.61 o
   0   5   2      245.39      224.46        4.15 o
   1   5   2      106.62      105.54        0.91 o
   2   5   2       95.96       97.82        0.86 o
   3   5   2      138.81      151.86        2.08 o
   4   5   2       20.66       18.13        0.80 o
   5   5   2       91.69       96.32        1.69 o
   6   5   2        7.98        7.34        1.25 o
   7   5   2       50.47       43.21        1.25 o
   8   5   2        2.39        1.81        0.41 o
   0   6   2      790.10      743.86        9.92 o
   1   6   2      477.11      462.15        3.86 o
   2   6   2      324.13      333.77        3.18 o
   3   6   2      652.77      681.56        6.76 o
   4   6   2       71.03       76.12        1.49 o
   5   6   2      424.66      442.11        5.46 o
   6   6   2        9.54        8.17        1.64 o
   7   6   2      184.72      180.63        3.60 o
   8   6   2        2.39        2.56        0.41 o
   0   7   2      561.51      478.17        8.37 o
   1   7   2      201.89      201.71        2.51 o
   2   7   2      190.76      193.71        2.44 o
   3   7   2      333.74      351.28        3.22 o
   4   7   2       42.65       44.38        1.15 o
   5   7   2      210.76      222.67        2.56 o
   6   7   2        5.47        4.92        0.62 o
   7   7   2       89.17       89.58        1.67 o
   8   7   2        2.12        0.28        0.39 o
   0   8   2       77.89       82.87        1.56 o
   1   8   2        7.48        7.87        0.48 o
   2   8   2       29.46       28.83        0.48 o
   3   8   2       13.09       15.09        1.60 o
   4   8   2        4.30        4.73        0.55 o
   5   8   2        2.96        3.65        0.30 o
   6   8   2        1.32        1.89        0.20 o
   7   8   2        1.75        1.16        0.23 o
   8   8   2        1.75        1.26        0.23 o
   0   9   2       71.78       60.66        1.50 o
   1   9   2       28.04       27.05        0.47 o
   2   9   2       20.66       19.44        0.40 o
   3   9   2       54.30       58.42        1.30 o
   4   9   2        0.94        1.03        0.04 o
   5   9   2       26.20       26.60        0.90 o
   6   9   2        1.32        0.90        0.20 o
   7   9   2        6.55        7.33        1.13 o
   8   9   2        2.39        1.31        0.82 <
   0  10   2       87.51       90.18        1.65 o
   1  10   2        6.33        7.65        0.44 o
   2  10   2       37.08       38.59        0.54 o
   3  10   2       12.78       12.91        1.58 o
   4  10   2        9.54        9.14        1.09 o
   5  10   2        5.68        5.21        0.63 o
   6  10   2        1.53        1.35        0.22 o
   7  10   2        2.67        1.78        0.43 o
   0  11   2       21.47       17.65        0.82 o
   1  11   2       11.54       12.58        0.90 o
   2  11   2        3.77        4.40        0.34 o
   3  11   2       25.31       26.95        0.89 o
   4  11   2        0.56        0.02        0.04 o
   5  11   2       10.95       11.29        1.75 o
   6  11   2        1.75        1.49        0.23 o
   7  11   2        2.67        2.06        0.43 o
   0  12   2      191.98      204.68        2.45 o
   1  12   2       16.48       17.72        1.79 o
   2  12   2       91.69       95.59        1.69 o
   3  12   2       30.42       30.93        0.97 o
   4  12   2       27.57       28.20        0.93 o
   5  12   2       18.32       19.75        3.78 o
   6  12   2        2.39        2.78        0.41 o
   7  12   2        4.68        6.16        0.95 o
   0  13   2      208.21      214.03        3.82 o
   1  13   2       48.61       53.05        0.62 o
   2  13   2      116.88      115.52        1.91 o
   3  13   2       90.01       92.33        1.67 o
   4  13   2       37.62       34.50        1.08 o
   5  13   2       63.79       65.21        1.41 o
   6  13   2        3.27        1.71        0.48 o
   7  13   2       23.56       22.69        1.29 o
   0  14   2      205.67      213.58        3.80 o
   1  14   2       12.15       14.04        1.54 o
   2  14   2      103.01      104.31        1.79 o
   3  14   2       20.66       21.35        0.80 o
   4  14   2       16.84       16.94        2.54 o
   5  14   2       23.56       22.38        0.86 o
   6  14   2        1.53        2.95        0.22 o
   7  14   2       18.70       18.30        4.58 o
   0  15   2     1209.09     1221.00       15.34 o
   1  15   2        4.49        3.63        0.37 o
   2  15   2      512.44      557.46        5.99 o
   3  15   2        7.98        8.02        1.00 o
   4  15   2       90.01      100.40        1.67 o
   5  15   2       10.38        8.97        1.71 o
   6  15   2        1.99        1.30        0.37 o
   7  15   2        5.47        7.72        1.03 o
   0  16   2      921.68      952.06       13.40 o
   1  16   2        1.53        0.05        0.22 o
   2  16   2      408.45      447.10        5.35 o
   3  16   2        0.38        0.19        0.04 o
   4  16   2       67.36       81.77        1.45 o
   5  16   2        1.12        0.41        0.19 o
   6  16   2        1.32        0.42        0.20 o
   0  17   2      136.74      142.36        3.10 o
   1  17   2        0.38        1.06        0.04 o
   2  17   2       62.39       67.94        1.39 o
   3  17   2        2.39        2.64        0.27 o
   4  17   2       10.66       15.61        1.73 o
   5  17   2        1.53        1.53        0.22 o
   6  17   2        1.32        0.68        0.20 o
   0  18   2       19.08       21.06        3.86 o
   1  18   2        0.19        0.17        0.04 o
   2  18   2        8.48        9.01        1.03 o
   3  18   2        0.56        0.60        0.04 o
   4  18   2        0.38        0.49        0.04 o
   5  18   2        2.12        0.48        0.39 o
   6  18   2        0.19        0.20        0.04 o
   0  19   2       30.91       30.15        0.98 o
   1  19   2        0.38        0.47        0.04 o
   2  19   2       12.78       13.76        1.89 o
   3  19   2        1.53        1.86        0.22 o
   4  19   2        0.56        1.36        0.04 o
   5  19   2        1.32        0.80        0.20 o
   6  19   2        2.39        0.19        0.41 o
   0  20   2        4.87        6.30        0.78 o
   1  20   2        0.38        0.36        0.04 o
   2  20   2        2.12        2.35        0.26 o
   3  20   2        1.75        1.48        0.23 o
   4  20   2        0.56        0.17        0.04 o
   5  20   2        2.52        1.61        0.42 o
   0  21   2        9.82        9.34        1.94 o
   1  21   2        0.94        0.45        0.04 o
   2  21   2        4.49        3.53        0.75 o
   3  21   2        1.32        1.71        0.20 o
   4  21   2        0.56        0.11        0.04 o
   5  21   2        1.12        0.86        0.19 o
   0  22   2        3.94        5.43        0.70 o
   1  22   2        4.87        4.81        0.58 o
   2  22   2        1.99        1.56        0.37 o
   3  22   2       25.31       22.09        0.89 o
   4  22   2        0.94        0.79        0.09 o
   0  23   2        5.27        8.76        1.01 o
   1  23   2       12.15       12.12        1.85 o
   2  23   2        1.12        2.20        0.09 o
   3  23   2       66.64       58.03        1.44 o
   4  23   2        0.94        0.32        0.09 o
   0  24   2       19.47       24.12        1.56 o
   1  24   2        6.55        6.83        1.13 o
   2  24   2       13.09       15.24        2.55 o
   3  24   2       36.55       31.61        1.60 o
   0  25   2       14.07       13.36        3.97 o
   1  25   2       23.56       22.24        1.29 o
   2  25   2        9.82        8.17        1.94 o
   3  25   2      124.64      100.41        2.96 o
   0  26   2        4.68        6.65        1.34 o
   1  26   2        9.82       10.58        1.66 o
   2  26   2        2.96        4.19        0.46 o
   2   0   3        1.75        1.10        0.12 o
   4   0   3        2.52        1.61        0.42 o
   6   0   3        2.96        4.03        0.61 o
   8   0   3        4.68        2.90        1.91 <
   1   1   3        9.00        7.47        0.79 o
   2   1   3       43.81       46.76        0.58 o
   3   1   3        1.12        1.14        0.09 o
   4   1   3       27.57       26.10        0.93 o
   5   1   3        0.78        0.28        0.04 o
   6   1   3        7.48        6.62        1.21 o
   7   1   3        0.78        0.67        0.09 o
   8   1   3        0.00        0.25        0.04 <
   1   2   3        0.38        0.35        0.04 o
   2   2   3        3.94        2.66        0.35 o
   3   2   3        0.19        0.44        0.04 o
   4   2   3        4.68        4.47        0.57 o
   5   2   3        1.53        1.45        0.22 o
   6   2   3        9.27        8.89        1.34 o
   7   2   3        4.12        4.50        0.90 o
   1   3   3      275.28      273.62        2.93 o
   2   3   3      125.62      124.72        1.98 o
   3   3   3       54.96       56.18        0.65 o
   4   3   3       84.24       85.14        1.62 o
   5   3   3        3.27        2.58        0.32 o
   6   3   3       68.09       66.88        1.46 o
   7   3   3        6.78        8.67        1.38 o
   1   4   3      719.80      749.24        7.10 o
   2   4   3      167.16      179.65        2.28 o
   3   4   3      171.76      192.54        2.31 o
   4   4   3      114.03      119.97        1.88 o
   5   4   3       16.84       16.15        2.54 o
   6   4   3       81.03       80.44        1.59 o
   7   4   3        1.53        2.35        0.22 o
   1   5   3      940.53      886.77        8.12 o
   2   5   3      371.85      405.91        5.11 o
   3   5   3      172.92      163.86        2.32 o
   4   5   3      356.69      381.17        5.00 o
   5   5   3       18.70       20.23        3.05 o
   6   5   3      268.01      280.85        4.33 o
   7   5   3        8.74        9.52        1.83 o
   1   6   3      426.48      365.04        3.65 o
   2   6   3      152.66      167.70        2.18 o
   3   6   3       46.78       38.51        1.21 o
   4   6   3      175.25      187.68        2.34 o
   5   6   3        4.87        4.31        0.78 o
   6   6   3      116.88      118.16        1.91 o
   7   6   3       10.95        8.98        2.34 o
   1   7   3       20.66       14.26        0.40 o
   2   7   3       36.01       39.10        0.53 o
   3   7   3        7.25        5.72        0.95 o
   4   7   3       51.73       55.10        1.27 o
   5   7   3       12.15       12.34        1.85 o
   6   7   3       38.71       39.86        1.10 o
   7   7   3        3.43        3.60        0.49 o
   1   8   3        4.87        6.19        0.39 o
   2   8   3        4.68        4.38        0.38 o
   3   8   3        1.53        1.57        0.22 o
   4   8   3        4.30        5.22        0.55 o
   5   8   3        7.48        6.99        1.21 o
   6   8   3        6.55        4.67        1.13 o
   7   8   3        4.12        4.47        0.90 o
   1   9   3        6.55        8.44        0.45 o
   2   9   3        2.39        2.69        0.14 o
   3   9   3        0.78        0.03        0.04 o
   4   9   3        3.43        4.01        0.49 o
   5   9   3        3.43        2.72        0.49 o
   6   9   3        2.67        1.92        0.43 o
   7   9   3        0.94        2.37        0.09 o
   1  10   3        1.53        1.84        0.11 o
   2  10   3        4.49        5.59        0.56 o
   3  10   3        0.94        1.14        0.04 o
   4  10   3        5.27        6.47        0.61 o
   5  10   3        3.43        3.15        0.49 o
   6  10   3        2.67        3.21        0.43 o
   7  10   3        2.39        1.51        0.41 o
   1  11   3       26.65       30.87        0.91 o
   2  11   3        1.99        1.98        0.12 o
   3  11   3        1.99        2.62        0.25 o
   4  11   3        1.32        1.95        0.20 o
   5  11   3        0.19        0.50        0.04 o
   6  11   3        0.78        0.80        0.09 o
   7  11   3        2.96        1.54        0.61 o
   1  12   3        7.98        8.54        1.00 o
   2  12   3        3.77        5.85        0.51 o
   3  12   3        3.27        4.19        0.32 o
   4  12   3        8.23        8.19        1.27 o
   5  12   3        1.32        2.22        0.20 o
   6  12   3        3.43        4.00        0.49 o
   7  12   3        1.32        0.05        0.20 o
   1  13   3      401.34      425.88        5.30 o
   2  13   3       34.44       35.08        1.04 o
   3  13   3       92.54      107.97        1.70 o
   4  13   3       44.40       44.18        1.18 o
   5  13   3        6.33        8.76        1.11 o
   6  13   3       25.31       26.05        1.33 o
   1  14   3      696.32      747.83        6.99 o
   2  14   3       55.61       49.56        1.32 o
   3  14   3      191.98      220.28        2.45 o
   4  14   3       63.09       61.75        1.40 o
   5  14   3       15.42       23.16        3.12 o
   6  14   3       39.26       38.54        1.11 o
   1  15   3      183.52      185.36        2.39 o
   2  15   3        8.23       11.30        1.01 o
   3  15   3       64.50       61.54        1.42 o
   4  15   3        5.89        6.75        0.86 o
   5  15   3        7.73        6.34        1.23 o
   6  15   3        3.77        4.03        0.51 o
   1  16   3      259.41      260.78        2.84 o
   2  16   3       17.21       17.79        2.93 o
   3  16   3       81.83       86.19        1.60 o
   4  16   3       16.84       14.95        3.26 o
   5  16   3        5.27        7.23        0.81 o
   6  16   3        5.89        6.94        1.07 o
   1  17   3       96.83       97.06        1.74 o
   2  17   3        1.32        0.71        0.20 o
   3  17   3       30.91       31.72        0.98 o
   4  17   3        0.38        1.13        0.04 o
   5  17   3        1.75        1.91        0.23 o
   1  18   3        2.96        3.79        0.30 o
   2  18   3        8.23        7.89        1.01 o
   3  18   3        1.12        1.10        0.09 o
   4  18   3        9.27        8.25        1.61 o
   5  18   3        1.32        0.15        0.20 o
   1  19   3       23.99       25.79        0.86 o
   2  19   3        1.32        0.35        0.20 o
   3  19   3        8.48        9.63        1.29 o
   4  19   3        0.78        0.47        0.09 o
   5  19   3        0.94        1.09        0.09 o
   1  20   3        4.12        3.98        0.72 o
   2  20   3        4.87        5.64        0.58 o
   3  20   3        1.53        1.28        0.22 o
   4  20   3        6.55        7.06        1.36 o
   1  21   3        9.82       11.07        1.66 o
   2  21   3        0.56        0.38        0.04 o
   3  21   3        4.12        4.61        0.72 o
   4  21   3        0.94        0.34        0.09 o
   1  22   3        6.33        5.34        1.11 o
   2  22   3       11.25       10.58        2.37 o
   3  22   3        1.53        1.08        0.22 o
   4  22   3       16.48       18.03        6.45 <
   1  23   3       11.54       12.16        1.80 o
   2  23   3       39.26       35.64        1.11 o
   3  23   3        2.96        3.52        0.46 o
   1  24   3        1.75        2.51        0.23 o
   2  24   3       69.56       62.07        2.21 o
   1  25   3        0.78        0.86        0.09 o
   0   0   4       66.64       61.95        2.16 o
   2   0   4       21.47       20.70        1.23 o
   4   0   4        1.32        1.59        0.20 o
   6   0   4        3.43        2.54        0.82 o
   0   1   4      563.60      602.42        8.38 o
   1   1   4        2.67        3.09        0.14 o
   2   1   4      279.69      271.59        2.95 o
   3   1   4        5.27        4.95        0.61 o
   4   1   4       39.82       37.46        1.11 o
   5   1   4        7.73        7.81        1.47 o
   6   1   4        2.39        1.51        0.41 o
   7   1   4        6.55        8.60        1.36 o
   0   2   4      536.69      570.48        8.18 o
   1   2   4       29.94       31.15        0.97 o
   2   2   4      268.01      268.57        2.89 o
   3   2   4       55.61       49.94        1.32 o
   4   2   4       47.39       47.86        1.22 o
   5   2   4       48.00       46.14        1.83 o
   6   2   4        1.12        0.61        0.19 o
   7   2   4       21.47       26.97        1.64 o
   0   3   4      145.12      149.77        2.13 o
   1   3   4       26.20       26.16        0.90 o
   2   3   4       77.89       78.06        1.56 o
   3   3   4       48.00       48.90        1.22 o
   4   3   4       25.31       21.81        1.33 o
   5   3   4       37.62       34.08        1.62 o
   6   3   4        0.78        0.74        0.09 o
   7   3   4        9.82       11.07        2.21 o
   0   4   4       38.71       37.60        1.10 o
   1   4   4        0.56        0.63        0.04 o
   2   4   4       19.47       18.33        0.78 o
   3   4   4        0.78        0.96        0.04 o
   4   4   4        7.25        7.22        1.19 o
   5   4   4        1.32        0.25        0.20 o
   6   4   4        1.75        2.50        0.23 o
   7   4   4        1.32        0.11        0.30 o
   0   5   4        0.19        0.66        0.04 o
   1   5   4        3.43        3.78        0.33 o
   2   5   4        0.94        0.51        0.04 o
   3   5   4       10.38        9.94        1.71 o
   4   5   4        1.32        1.06        0.20 o
   5   5   4        5.89        4.61        0.86 o
   6   5   4        1.53        2.17        0.22 o
   7   5   4        0.78        0.76        0.09 o
   0   6   4       24.43       22.84        0.87 o
   1   6   4        1.32        0.93        0.10 o
   2   6   4       10.38        9.49        1.71 o
   3   6   4        4.49        4.12        0.75 o
   4   6   4        3.43        3.31        0.49 o
   5   6   4        9.82        8.49        1.66 o
   6   6   4        4.12        2.93        0.72 o
   7   6   4        9.00        8.45        2.12 o
   0   7   4       29.46       21.32        0.96 o
   1   7   4       29.94       30.54        0.97 o
   2   7   4        5.47        2.30        0.62 o
   3   7   4      112.16      110.24        1.87 o
   4   7   4        1.99        0.80        0.37 o
   5   7   4      113.09      113.16        1.88 o
   6   7   4        1.99        1.40        0.37 o
   0   8   4       85.05       69.88        1.63 o
   1   8   4       64.50       68.52        1.42 o
   2   8   4       29.46       22.33        0.96 o
   3   8   4      226.42      235.37        2.66 o
   4   8   4        4.87        5.73        0.78 o
   5   8   4      205.67      211.98        2.53 o
   6   8   4        1.75        0.99        0.23 o
   0   9   4       22.71       22.02        0.84 o
   1   9   4       24.43       25.09        0.87 o
   2   9   4        7.48        8.41        0.97 o
   3   9   4       85.05       86.30        1.63 o
   4   9   4        4.30        3.49        0.73 o
   5   9   4       80.24       79.97        1.58 o
   6   9   4        0.94        1.31        0.09 o
   0  10   4       29.46       28.92        0.96 o
   1  10   4        6.11        6.45        0.65 o
   2  10   4       12.15       13.75        1.85 o
   3  10   4       19.86       21.01        0.79 o
   4  10   4        4.68        4.61        0.76 o
   5  10   4       17.57       17.76        3.33 o
   6  10   4        1.75        2.46        0.23 o
   0  11   4      123.65      138.85        1.96 o
   1  11   4       25.31       24.67        0.89 o
   2  11   4       58.95       69.32        1.36 o
   3  11   4       95.10       92.41        1.72 o
   4  11   4       19.86       22.88        0.79 o
   5  11   4       85.87       80.19        1.64 o
   6  11   4        1.75        1.79        0.23 o
   0  12   4      149.40      175.22        3.24 o
   1  12   4       13.09       12.74        2.24 o
   2  12   4       63.79       76.44        1.41 o
   3  12   4       63.79       55.64        1.41 o
   4  12   4       11.54       13.85        1.80 o
   5  12   4       62.39       59.00        1.39 o
   6  12   4        1.99        2.29        0.37 o
   0  13   4       75.57       82.70        2.30 o
   1  13   4        2.52        1.92        0.28 o
   2  13   4       28.51       32.01        0.94 o
   3  13   4       12.78       10.57        1.89 o
   4  13   4        1.12        2.01        0.09 o
   5  13   4       16.84       16.57        3.26 o
   6  13   4        5.06        3.02        1.19 o
   0  14   4        3.77        4.40        0.69 o
   1  14   4        0.56        0.48        0.04 o
   2  14   4        1.12        1.98        0.09 o
   3  14   4        1.99        1.11        0.37 o
   4  14   4        0.94        0.43        0.04 o
   5  14   4        0.78        0.68        0.09 o
   0  15   4       23.99       22.29        1.30 o
   1  15   4        0.19        0.13        0.04 o
   2  15   4       11.85       10.18        1.82 o
   3  15   4        1.32        0.77        0.20 o
   4  15   4        0.94        0.71        0.04 o
   5  15   4        0.56        1.24        0.04 o
   0  16   4       33.93       36.76        1.54 o
   1  16   4        0.56        0.43        0.04 o
   2  16   4       20.26       21.30        0.79 o
   3  16   4        1.53        0.29        0.22 o
   4  16   4        4.68        5.40        0.76 o
   5  16   4        0.94        0.13        0.09 o
   0  17   4      270.91      274.10        5.81 o
   1  17   4        0.56        0.01        0.04 o
   2  17   4      153.75      159.11        2.19 o
   3  17   4        1.32        1.73        0.20 o
   4  17   4       30.42       36.08        0.97 o
   0  18   4      263.69      254.59        5.73 o
   1  18   4        2.12        1.30        0.39 o
   2  18   4      146.19      143.20        2.13 o
   3  18   4        8.48        9.78        1.29 o
   4  18   4       25.75       27.78        1.34 o
   0  19   4       25.75       31.95        1.34 o
   1  19   4        0.78        0.28        0.04 o
   2  19   4       14.07       17.54        2.32 o
   3  19   4        1.53        1.81        0.22 o
   4  19   4        2.52        3.37        0.42 o
   0  20   4       26.65       22.77        1.37 o
   1  20   4        1.99        1.03        0.37 o
   2  20   4       10.95       10.70        1.75 o
   3  20   4        5.06        5.34        0.99 o
   0  21   4       17.21       15.79        5.49 o
   1  21   4        7.48        7.30        1.21 o
   2  21   4        9.27        8.20        1.34 o
   3  21   4       40.38       31.42        1.68 o
   0  22   4       26.65       24.61        1.82 o
   1  22   4       13.41       10.99        2.59 o
   2  22   4       15.77       16.82        3.15 o
   0  23   4        9.54       10.64        2.73 o
   2   0   5       38.71       30.19        1.65 o
   4   0   5       18.70       19.17        6.11 o
   6   0   5        8.23       10.22        2.53 o
   1   1   5      748.49      780.66        7.24 o
   2   1   5        8.74        7.62        1.04 o
   3   1   5      257.99      263.31        4.25 o
   4   1   5        5.68        6.28        1.05 o
   5   1   5       21.88       24.92        1.24 o
   6   1   5        1.12        0.98        0.19 o
   1   2   5        7.73        7.79        0.98 o
   2   2   5        8.48        6.51        1.03 o
   3   2   5        2.39        3.18        0.41 o
   4   2   5        9.27        7.58        1.88 o
   5   2   5        2.39        1.04        0.41 o
   6   2   5        2.96        2.17        0.61 o
   1   3   5       64.50       57.46        1.42 o
   2   3   5        1.53        1.42        0.22 o
   3   3   5       18.32       16.29        3.78 o
   4   3   5        3.43        1.50        0.49 o
   5   3   5        0.94        0.71        0.09 o
   6   3   5        2.96        0.51        0.61 o
   1   4   5        3.77        4.28        0.51 o
   2   4   5        3.43        4.21        0.49 o
   3   4   5        1.75        1.25        0.23 o
   4   4   5        7.25        5.28        1.19 o
   5   4   5        0.94        0.22        0.09 o
   6   4   5        3.94        2.35        0.70 o
   1   5   5       19.08       16.71        3.08 o
   2   5   5        1.32        0.76        0.20 o
   3   5   5        6.11        4.52        0.87 o
   4   5   5        1.12        0.78        0.19 o
   5   5   5        1.99        0.49        0.37 o
   6   5   5        1.32        0.45        0.30 o
   1   6   5        1.32        1.28        0.20 o
   2   6   5        6.78        6.71        1.15 o
   3   6   5        5.27        0.04        0.81 o
   4   6   5       10.09        9.63        1.96 o
   5   6   5        1.75        0.32        0.35 o
   1   7   5        9.00       10.48        1.32 o
   2   7   5        1.99        1.80        0.37 o
   3   7   5        2.39        1.91        0.41 o
   4   7   5        3.77        2.21        0.51 o
   5   7   5        1.75        0.15        0.35 o
   1   8   5        0.38        0.64        0.04 o
   2   8   5       21.47       21.79        0.82 o
   3   8   5        2.67        3.35        0.43 o
   4   8   5       39.26       36.44        1.11 o
   5   8   5        7.98        5.57        1.50 o
   1   9   5       21.06       22.72        0.81 o
   2   9   5       85.05       84.46        1.63 o
   3   9   5       12.78       13.81        1.89 o
   4   9   5      146.19      138.53        2.13 o
   5   9   5        7.48        7.49        1.45 o
   1  10   5       89.17      111.27        1.67 o
   2  10   5      107.53      101.53        1.83 o
   3  10   5       28.51       26.67        1.88 o
   4  10   5      185.92      171.25        2.41 o
   5  10   5        0.78        0.10        0.09 o
   1  11   5       34.44       35.82        1.04 o
   2  11   5       51.10       50.22        1.26 o
   3  11   5        5.27        7.18        0.81 o
   4  11   5       90.01       86.59        1.67 o
   5  11   5        0.56        0.53        0.04 o
   1  12   5        4.12        5.54        0.72 o
   2  12   5        0.56        0.29        0.04 o
   3  12   5        2.12        1.92        0.39 o
   4  12   5        0.78        0.16        0.09 o
   1  13   5        6.11        7.20        0.87 o
   2  13   5        7.98        9.08        1.25 o
   3  13   5        4.12        2.80        0.72 o
   4  13   5       12.15       12.77        2.46 o
   1  14   5        7.25        5.48        1.19 o
   2  14   5        0.56        0.30        0.04 o
   3  14   5        3.43        2.54        0.49 o
   4  14   5        0.78        0.36        0.09 o
   1  15   5        1.75        2.85        0.23 o
   2  15   5        3.94        3.30        0.70 o
   3  15   5        0.94        1.53        0.09 o
   4  15   5        5.47        4.05        1.03 o
   1  16   5       11.54        9.05        2.40 o
   2  16   5        1.32        0.28        0.20 o
   3  16   5        3.94        3.07        0.70 o
   1  17   5        1.32        1.91        0.20 o
   2  17   5        4.49        3.42        0.75 o
   3  17   5        1.75        0.69        0.35 o
   1  18   5       63.09       56.04        2.10 o
   2  18   5        2.67        3.92        0.58 o
   1  19   5        0.56        0.91        0.09 o
   0   0   6       81.03       43.74        3.97 o
   2   0   6       27.57       27.39        1.85 o
   4   0   6        5.68        9.03        1.68 o
   0   1   6      223.77      216.06        6.60 o
   1   1   6        0.78        0.05        0.09 o
   2   1   6      131.63      124.55        3.04 o
   3   1   6        2.39        1.82        0.41 o
   4   1   6       22.71       25.81        1.26 o
   0   2   6      215.92      222.79        5.19 o
   1   2   6        0.78        0.46        0.09 o
   2   2   6      133.66      125.81        3.06 o
   3   2   6        6.33        6.47        1.33 o
   4   2   6       23.13       24.91        1.27 o
   0   3   6       79.45       83.43        3.15 o
   1   3   6        1.53        0.70        0.22 o
   2   3   6       49.23       47.63        1.86 o
   3   3   6        4.30        4.70        0.73 o
   4   3   6        9.27       10.74        1.88 o
   0   4   6        1.12        1.31        0.19 o
   1   4   6        1.12        0.26        0.19 o
   2   4   6        1.99        1.40        0.37 o
   3   4   6        1.32        0.91        0.20 o
   4   4   6        2.39        2.01        0.41 o
   0   5   6        7.48        8.52        1.69 o
   1   5   6        2.12        1.08        0.39 o
   2   5   6        4.30        3.92        0.73 o
   3   5   6        3.43        3.90        0.49 o
   4   5   6        0.78        0.96        0.09 o
   0   6   6        4.12        2.43        0.90 o
   1   6   6        1.75        0.29        0.23 o
   2   6   6        1.99        2.14        0.37 o
   3   6   6        0.94        1.26        0.09 o
   4   6   6        1.99        2.22        0.37 o
   0   7   6        3.27        4.02        0.96 o
   1   7   6       11.54       11.96        2.70 o
   2   7   6        1.53        1.79        0.33 o
   3   7   6       57.61       54.25        2.01 o
   4   7   6        1.12        1.13        0.19 o
   0   8   6        6.33        7.57        1.78 o
   1   8   6       18.32       19.21        4.53 o
   2   8   6        3.43        3.74        0.65 o
   3   8   6      102.11       91.02        2.68 o
   0   9   6        0.94        1.14        0.13 o
   1   9   6        5.68        5.05        1.05 o
   2   9   6        1.12        0.53        0.19 o
   3   9   6       30.91       25.29        1.47 o
   0  10   6       20.26       19.02        3.18 o
   1  10   6        1.32        1.15        0.30 o
   2  10   6       13.09       14.50        3.19 o
   3  10   6        5.68        5.21        1.05 o
   0  11   6       29.46       33.68        1.92 o
   1  11   6        8.48        9.99        2.06 o
   2  11   6       24.86       27.75        1.32 o
   3  11   6       49.85       44.55        1.87 o
   0  12   6       26.20       25.91        2.26 o
   1  12   6        6.33        7.71        1.55 o
   2  12   6       15.77       18.75        4.56 o
   0  13   6       16.12       18.08        6.38 <
   1  13   6        1.32        0.61        0.30 o
   2  13   6        9.27       10.62        2.15 o
   0  14   6        4.68        4.51        1.53 o
   1  14   6        0.78        0.17        0.09 o
