# Supplementary material for: Competition between hydrogen bonding and dispersion interactions in the crystal structures of the primary amines
Source: Royal Society of Chemistry journal article supplement (doi:10.1039/c3ce42639d), 2014-01-01
Supplement: c3ce42639d9.fcf [file c3ce42639d9.fcf]

data_pentylamine 
#  Pentylamine in Pbcn at 150K                     
_audit_creation_date        "11-02-03"
_audit_creation_method      CRYSTALS 

_cell_length_a                    33.546(4)
_cell_angle_alpha                 90
_cell_length_b                    6.4878(8)
_cell_angle_beta                  90
_cell_length_c                    5.7295(7)
_cell_angle_gamma                 90

# NOTE FO on scale of Fc,      5.62009
# Status flags: 
#    o - used in refinement 
#    < - excluded by I/sigmaI cutoff 
#    x - excluded for another reason  

loop_
_refln_index_h
_refln_index_k
_refln_index_l
_refln_F_squared_meas
_refln_F_squared_calc
_refln_F_squared_sigma
_refln_observed_status
   2   0   0     1318.06     1852.66       44.22 x
   4   0   0      571.30      534.90        9.91 o
   6   0   0     1154.87     1144.82       16.59 o
   8   0   0      287.52      293.49        5.10 o
  10   0   0      401.19      441.71        7.57 o
  12   0   0       18.21       17.73        6.93 <
  14   0   0     1056.37     1047.98       16.57 o
  16   0   0      200.31      171.05        6.73 o
  18   0   0       23.63       15.94        9.95 <
  20   0   0       34.30       25.83        6.17 o
  22   0   0       42.45       32.50        5.39 o
  24   0   0      183.41      162.70       11.14 o
  26   0   0     4338.25     4238.72      115.15 o
  28   0   0     1377.12     1332.74       42.61 o
  30   0   0       69.49       58.20       20.53 o
  32   0   0       60.64       36.22       21.48 <
  34   0   0       -2.84        6.49        7.16 <
  36   0   0       -9.48        2.52       25.39 <
  38   0   0      -22.43        0.28       61.89 <
  40   0   0       32.53       55.65       24.64 <
   1   1   0        0.06        0.19        0.06 <
   3   1   0      100.72      107.36        1.96 o
   5   1   0        0.03        1.86        0.09 <
   7   1   0       89.76       91.10        2.57 o
   9   1   0        1.49        1.96        0.53 <
  11   1   0        0.08        2.10        0.27 <
  13   1   0     3499.69     3424.32       37.21 o
  15   1   0      488.06      467.31        7.20 o
  17   1   0       40.29       22.73        3.72 o
  19   1   0       40.31       40.18        4.48 o
  21   1   0       -1.67        0.31        1.45 <
  23   1   0       12.58        3.60        7.90 <
  25   1   0       -1.18        3.05        3.27 <
  27   1   0       15.00        7.10       15.50 <
  29   1   0       -4.32        2.12        8.27 <
  31   1   0        8.11        1.77       13.51 <
  33   1   0        0.95        0.09        2.19 <
  35   1   0       -8.69        1.22       15.78 <
  37   1   0       -0.79        2.63        3.99 <
  39   1   0       20.85       35.70       43.65 <
  41   1   0       35.22       37.85       18.09 <
   0   2   0    31585.40    32454.48     1096.96 o
   2   2   0      538.77      527.67       10.87 o
   4   2   0       74.81       80.50        3.15 o
   6   2   0      186.49      179.10        3.98 o
   8   2   0       79.24       89.25        2.76 o
  10   2   0       79.80       65.13        2.68 o
  12   2   0       12.95       12.61        4.35 o
  14   2   0      402.82      388.86        5.97 o
  16   2   0       15.85       19.69        5.34 o
  18   2   0       11.00        5.37        4.36 <
  20   2   0        5.60        7.60        4.64 <
  22   2   0        7.52       12.37        7.84 <
  24   2   0       57.49       65.91        7.35 o
  26   2   0     1734.23     1842.45       31.84 o
  28   2   0      557.88      577.95       16.92 o
  30   2   0       27.16       29.98       25.30 <
  32   2   0       34.22       12.12       13.39 <
  34   2   0       -9.63        6.84       17.95 <
  36   2   0      -21.64        0.62       21.20 <
  38   2   0       -0.47        0.89        2.05 <
  40   2   0       58.43       35.67       19.32 o
   1   3   0        4.34        6.18        1.51 <
   3   3   0       70.31       60.51        4.00 o
   5   3   0       15.42       13.17        5.31 <
   7   3   0      115.92      109.58        4.00 o
   9   3   0       -1.47        0.34        0.82 <
  11   3   0       51.36       49.00        2.98 o
  13   3   0     3438.42     3680.86       36.51 o
  15   3   0      694.07      688.85       10.44 o
  17   3   0       13.76       23.09        7.23 <
  19   3   0       63.62       68.34        5.62 o
  21   3   0       -4.47        0.18        3.78 <
  23   3   0        2.72        5.36        3.82 <
  25   3   0       19.58        8.98       17.75 <
  27   3   0       29.00       17.59       19.73 <
  29   3   0       13.58        4.95       14.72 <
  31   3   0       -4.95        8.06        7.69 <
  33   3   0       -0.63        1.39        1.84 <
  35   3   0       44.06        4.05       15.75 <
  37   3   0       17.37        7.82       51.42 <
   0   4   0     3051.15     2734.87       79.73 o
   2   4   0       68.12       58.18        6.81 o
   4   4   0       69.99       50.04        5.13 o
   6   4   0        0.00        0.37        0.54 <
   8   4   0       43.22       33.75        4.48 o
  10   4   0       -0.59        2.51        0.71 <
  12   4   0        8.80        9.53        5.30 <
  14   4   0       71.65       80.66        5.26 o
  16   4   0        5.05        6.75        5.50 <
  18   4   0       13.27       14.55        9.85 <
  20   4   0       13.37        1.42        9.63 <
  22   4   0        3.16        1.80        3.83 <
  24   4   0       20.85       16.21       14.75 <
  26   4   0      294.27      320.10       15.27 o
  28   4   0       99.70       98.72       11.82 o
  30   4   0       21.16        6.16       27.82 <
  32   4   0       19.43        0.29       33.50 <
  34   4   0       26.53        4.72       22.56 <
  36   4   0        5.05        0.16       14.96 <
   1   5   0        6.19        2.00        6.03 <
   3   5   0        3.98        7.36        2.66 <
   5   5   0        3.16        0.63        3.85 <
   7   5   0       21.60       18.42       15.79 <
   9   5   0       21.92       19.23       13.83 <
  11   5   0       29.63       37.81       16.69 <
  13   5   0     1739.32     1998.08       25.77 o
  15   5   0      414.14      451.82       10.79 o
  17   5   0       31.69       27.77        6.98 o
  19   5   0        9.71        7.72        9.69 <
  21   5   0        8.05        0.00       10.84 <
  23   5   0       16.42        0.02       17.67 <
  25   5   0       -0.16        6.48        1.89 <
  27   5   0       21.37       17.03       18.07 <
  29   5   0        4.11        0.43        7.70 <
  31   5   0       -2.84        2.40        7.87 <
  33   5   0       18.11        0.85       26.94 <
   0   6   0       18.00        9.48       26.11 <
   2   6   0        1.00        0.86        1.64 <
   4   6   0        1.21        2.73        2.18 <
   6   6   0        0.06       10.83        1.21 <
   8   6   0       16.49       15.53       12.65 <
  10   6   0        8.59       15.21        7.60 <
  12   6   0       14.45       16.11       13.80 <
  14   6   0       30.32       15.70       21.78 <
  16   6   0        1.03       24.74        3.85 <
  18   6   0        7.74       14.27        9.76 <
  20   6   0       14.13        5.64       15.16 <
  22   6   0       10.90        0.95       13.04 <
  24   6   0       11.13        2.04       13.33 <
  26   6   0        8.61        0.05       14.81 <
  28   6   0       38.01        0.62       11.72 o
   1   7   0        3.08        1.09        6.86 <
   3   7   0        3.79        3.19        5.36 <
   5   7   0       -3.98        2.26        4.30 <
   7   7   0        0.63        0.21        1.85 <
   9   7   0       23.16       21.63       30.08 <
  11   7   0       25.06       20.72       27.68 <
  13   7   0      526.11      602.98       19.93 o
  15   7   0      152.77      165.99       13.91 o
  17   7   0       19.69        9.94       21.60 <
  19   7   0       15.37        1.26       22.81 <
  21   7   0        8.74        1.04       18.52 <
   0   8   0       87.81      118.24       16.76 o
   2   8   0       19.98       21.73       26.49 <
   4   8   0       11.43        1.08       13.26 <
   6   8   0       -4.63        1.99        8.55 <
   1   1   1      191.62      178.29        6.14 o
   2   1   1    22979.16    22971.12      214.03 o
   3   1   1      814.53      670.78       12.58 o
   4   1   1       27.45       35.01        4.92 o
   5   1   1     1119.92     1181.34       11.33 o
   6   1   1     1827.36     1884.23       17.93 o
   7   1   1       99.73      105.56        2.62 o
   8   1   1       75.43       79.88        2.13 o
   9   1   1      446.12      446.95        5.14 o
  10   1   1      724.13      729.75        7.64 o
  11   1   1      259.11      267.47        3.69 o
  12   1   1      324.21      352.78        3.92 o
  13   1   1     2156.54     1949.80       17.51 o
  14   1   1      535.63      530.86        5.55 o
  15   1   1       53.18       35.06        2.22 o
  16   1   1      879.04      952.94        8.36 o
  17   1   1      432.31      415.59        5.12 o
  18   1   1       32.00       19.49        3.44 o
  19   1   1       27.01       33.31        6.76 o
  20   1   1      406.90      442.10        6.24 o
  21   1   1      152.67      127.62        4.73 o
  22   1   1       -1.96        0.00        1.99 <
  23   1   1      156.44      144.87        4.85 o
  24   1   1     1054.48     1108.44       13.45 o
  25   1   1       44.85       18.86        7.56 o
  26   1   1      716.79      757.98       13.08 o
  27   1   1       54.76       30.16        5.95 o
  28   1   1      893.55      977.25       16.75 o
  29   1   1       38.53       16.43        8.88 o
  30   1   1       90.70       93.93        7.17 o
  31   1   1       34.16       36.56        7.71 o
  32   1   1       18.68       23.89       11.66 <
  33   1   1       15.73       11.61       20.69 <
  34   1   1       30.56       19.82       29.49 <
  35   1   1        1.66        2.08        6.07 <
  36   1   1       -8.13        2.03       12.36 <
  37   1   1       13.74       22.09       21.39 <
  38   1   1       -1.18        5.31        6.17 <
  39   1   1        6.32       18.12       13.01 <
  40   1   1      -21.08        1.17       27.85 <
  41   1   1        1.68       12.14        4.28 <
   0   2   1      499.41      472.17        7.92 o
   1   2   1      555.93      585.63        6.04 o
   2   2   1       31.80       26.50        2.62 o
   3   2   1      334.51      363.36        4.58 o
   4   2   1      230.16      221.47        3.76 o
   5   2   1      108.63      117.55        2.72 o
   6   2   1       24.00       17.40        4.27 o
   7   2   1      257.24      283.62        3.71 o
   8   2   1      120.22      119.71        2.57 o
   9   2   1       25.34       28.72        4.45 o
  10   2   1      122.57      113.61        3.00 o
  11   2   1     1828.40     1855.12       16.59 o
  12   2   1        7.12        4.44        1.71 o
  13   2   1      262.33      271.07        4.08 o
  14   2   1        0.80        5.79        0.27 <
  15   2   1     1369.10     1390.89       12.51 o
  16   2   1       24.36       20.11        7.23 o
  17   2   1       85.37       74.74        3.10 o
  18   2   1       52.83       54.23        3.27 o
  19   2   1       48.24       28.63        3.97 o
  20   2   1        3.72        9.02        2.49 <
  21   2   1       30.61       42.17       10.75 <
  22   2   1       11.03       14.76        5.92 <
  23   2   1        6.05       11.69        4.43 <
  24   2   1       20.02       24.10        8.97 <
  25   2   1       31.70       27.79        6.83 o
  26   2   1       29.63       19.68       12.95 <
  27   2   1       45.76       42.66        5.40 o
  28   2   1       13.99        3.09       11.20 <
  29   2   1       74.99       66.58        6.91 o
  30   2   1       26.98       19.79       15.99 <
  31   2   1        5.87        3.01        8.36 <
  32   2   1       -3.47        2.60        6.36 <
  33   2   1       13.71       10.48       14.09 <
  34   2   1        9.73        3.03       12.77 <
  35   2   1       10.04        0.49       11.46 <
  36   2   1       26.95        8.13       34.78 <
  37   2   1       34.64       30.78       16.37 <
  38   2   1       15.90        1.54       19.80 <
  39   2   1       80.65       67.38       15.33 o
  40   2   1      -17.48        0.52       27.93 <
   1   3   1       52.24       33.46        3.39 o
   2   3   1     2076.72     2020.74       20.67 o
   3   3   1       91.49       93.25        3.69 o
   4   3   1       12.93       17.29        3.21 o
   5   3   1      129.34      133.41        3.19 o
   6   3   1      155.08      166.76        3.54 o
   7   3   1       16.85       15.76        4.23 o
   8   3   1        3.75        3.68        1.08 o
   9   3   1       59.36       55.13        2.37 o
  10   3   1       62.82       63.46        2.39 o
  11   3   1       11.98       12.80        3.45 o
  12   3   1       16.35       12.29        4.34 o
  13   3   1      431.71      429.20        5.68 o
  14   3   1       33.72       26.46        4.59 o
  15   3   1       25.64       21.90        8.54 o
  16   3   1      133.63      133.78        4.67 o
  17   3   1       70.67       66.44        4.06 o
  18   3   1        1.18        3.17        1.57 <
  19   3   1        5.40       10.94        3.39 <
  20   3   1       70.57       76.29        4.38 o
  21   3   1       33.51       31.47        5.41 o
  22   3   1       -1.06        0.00        1.39 <
  23   3   1       36.58       40.08        6.12 o
  24   3   1      248.98      278.14        7.12 o
  25   3   1       12.29        6.94        7.63 <
  26   3   1      171.39      186.82        6.39 o
  27   3   1       11.91       11.32        7.78 <
  28   3   1      232.98      257.73        8.83 o
  29   3   1       21.06        8.74       18.02 <
  30   3   1       18.95       29.08       17.25 <
  31   3   1       21.48       12.08       20.10 <
  32   3   1       46.51        8.38       12.58 o
  33   3   1       17.61        2.95       22.52 <
  34   3   1       15.79        2.31       19.88 <
  35   3   1       11.53        0.51       17.56 <
  36   3   1       18.48        0.21       20.20 <
  37   3   1       25.27        4.23       21.06 <
  38   3   1       23.06        0.02       23.69 <
   0   4   1      190.93      203.33        9.05 o
   1   4   1      249.08      253.24        5.80 o
   2   4   1       17.21        3.68        7.18 <
   3   4   1      137.30      126.28        4.59 o
   4   4   1      103.43       91.94        3.95 o
   5   4   1       82.47       69.60        3.67 o
   6   4   1        9.10       11.37        3.91 <
   7   4   1       74.20       66.47        3.74 o
   8   4   1       47.44       52.95        3.59 o
   9   4   1       41.13       35.61        3.91 o
  10   4   1       73.40       58.20        3.54 o
  11   4   1      842.54      909.46        9.83 o
  12   4   1       13.18        2.63        5.38 <
  13   4   1      132.84      123.65        4.64 o
  14   4   1       11.28        5.71        6.14 <
  15   4   1      716.59      826.95       10.43 o
  16   4   1       19.55       19.49        9.49 <
  17   4   1       95.30       90.75        4.86 o
  18   4   1       30.72       40.73       12.17 <
  19   4   1       11.74       16.60        5.66 <
  20   4   1        6.35        8.17        5.17 <
  21   4   1       30.45       33.43       11.78 <
  22   4   1       13.11       15.19        7.56 <
  23   4   1        5.92        6.86        4.96 <
  24   4   1       20.61       17.97       10.63 <
  25   4   1       21.87       20.03       10.92 <
  26   4   1       41.26       28.92        6.30 o
  27   4   1       48.13       45.92        7.24 o
  28   4   1       17.64        5.88       10.84 <
  29   4   1       73.37       72.01        7.58 o
  30   4   1       26.62       22.51       16.89 <
  31   4   1       16.55        6.25       18.31 <
  32   4   1       24.00        4.78       25.41 <
  33   4   1       32.22        9.96       15.57 <
  34   4   1       26.53        4.68       32.43 <
  35   4   1        2.63        0.59        9.23 <
  36   4   1       27.90       12.82       32.10 <
   1   5   1       10.18        6.53        5.32 <
   2   5   1      187.90      157.50        6.06 o
   3   5   1       19.62       17.60        8.21 <
   4   5   1        5.79        4.58        3.91 <
   5   5   1       15.76       13.46        7.31 <
   6   5   1       11.16        7.56        6.32 <
   7   5   1        5.71        2.00        3.66 <
   8   5   1        4.13        0.69        3.31 <
   9   5   1        5.20        1.93        3.63 <
  10   5   1       -0.89        0.14        0.73 <
  11   5   1        1.42        1.93        1.78 <
  12   5   1       13.12       17.43        6.43 <
  13   5   1       65.24       60.97        4.51 o
  14   5   1       13.18       17.39        6.36 <
  15   5   1       12.26       11.49        5.39 <
  16   5   1        2.07        1.30        2.43 <
  17   5   1       -3.79        1.68        3.40 <
  18   5   1        4.78        0.01        5.25 <
  19   5   1        9.16        2.58        8.88 <
  20   5   1        4.92        7.05        4.99 <
  21   5   1       14.21        4.82       11.69 <
  22   5   1        6.68        0.12        6.86 <
  23   5   1       10.24        7.18        9.26 <
  24   5   1       26.44       32.77       16.81 <
  25   5   1       10.38        2.87        9.33 <
  26   5   1       12.72       17.82       11.88 <
  27   5   1        8.12        1.55        8.96 <
  28   5   1       18.64       16.06       16.75 <
  29   5   1        9.16        3.01        8.93 <
  30   5   1       -7.67        2.33        8.86 <
  31   5   1        5.91        1.63        8.91 <
  32   5   1        5.11        0.93        7.13 <
   0   6   1      114.65      107.29        9.00 o
   1   6   1       61.94       40.42        5.12 o
   2   6   1        7.90        0.64        5.58 <
   3   6   1       33.41       25.95        6.84 o
   4   6   1       34.81       33.61        5.72 o
   5   6   1       15.41       20.28        9.01 <
   6   6   1       13.16        9.40        7.48 <
   7   6   1       14.17       13.80        8.13 <
   8   6   1       22.85       30.74       17.06 <
   9   6   1       37.23       35.40        8.24 o
  10   6   1       52.57       43.01        6.38 o
  11   6   1      456.36      537.27       11.52 o
  12   6   1       18.77        5.05       12.28 <
  13   6   1       63.71       59.79        6.70 o
  14   6   1       25.72        3.38       13.62 <
  15   6   1      377.13      412.85       11.73 o
  16   6   1       18.53       18.11       12.57 <
  17   6   1       91.69       92.47        7.71 o
  18   6   1       34.02       24.11        7.89 o
  19   6   1       16.74        4.45       15.10 <
  20   6   1        9.00        5.53        6.93 <
  21   6   1        8.32        9.17        7.94 <
  22   6   1       16.42        8.35       14.26 <
  23   6   1       16.11        1.47       12.76 <
  24   6   1       20.40        3.33       18.01 <
  25   6   1        9.66        1.28       10.15 <
  26   6   1       52.88       23.56        9.02 o
  27   6   1       36.32       12.20        9.05 o
   1   7   1        2.25        0.46        4.11 <
   2   7   1       32.73       26.17        8.49 o
   3   7   1        5.37        0.04        5.96 <
   4   7   1       12.59        4.30       11.70 <
   5   7   1       -2.21        0.21        4.14 <
   6   7   1       -0.59        0.03        1.23 <
   7   7   1       -1.22        0.09        2.76 <
   8   7   1       -5.73        2.57        7.51 <
   9   7   1        9.16        2.69        8.63 <
  10   7   1       -1.53        2.87        3.99 <
  11   7   1       -4.29        4.13        6.58 <
  12   7   1       30.37       28.08       22.34 <
  13   7   1        6.90        0.79        9.60 <
  14   7   1       46.43       42.35        9.04 o
  15   7   1        7.11        1.79        7.93 <
  16   7   1       23.96        7.00       17.61 <
  17   7   1       12.59        2.86        9.83 <
  18   7   1        7.81        0.59        9.41 <
  19   7   1       11.69        0.02       12.52 <
  20   7   1       15.11        0.19       12.59 <
   0   8   1       48.48       31.33       13.90 o
   1   8   1       15.36        0.21       11.82 <
   2   8   1       10.92        3.52       10.53 <
   3   8   1       14.44        1.03       10.75 <
   4   8   1       -9.63        3.56       22.57 <
   0   0   2    17493.58    17653.77      341.14 o
   1   0   2     2557.05     2277.83       36.54 o
   2   0   2      170.09      158.67        6.34 o
   3   0   2     1279.47     1195.99       19.19 o
   4   0   2        6.63        2.52        2.56 <
   5   0   2       76.63       61.95        3.66 o
   6   0   2      285.97      316.09        6.90 o
   7   0   2        5.64       15.95        1.99 <
   8   0   2      163.77      182.36        5.24 o
   9   0   2      140.08      128.16        5.10 o
  10   0   2     1289.72     1303.08       18.48 o
  11   0   2     2180.88     2259.48       29.93 o
  12   0   2        1.58        3.93        1.11 <
  13   0   2      324.74      335.46        6.77 o
  14   0   2       39.56       55.31        4.31 o
  15   0   2     2223.33     2047.84       25.90 o
  16   0   2      378.01      401.85        6.86 o
  17   0   2       15.10        8.89        6.08 <
  18   0   2      160.24      151.24        5.79 o
  19   0   2       -0.90       11.66        0.65 <
  20   0   2       31.59       25.44       15.10 <
  21   0   2        3.66        0.33        3.25 <
  22   0   2       -2.97        6.55        3.69 <
  23   0   2      113.90      109.98        7.54 o
  24   0   2       81.49      104.29        7.29 o
  25   0   2      337.02      393.09       11.45 o
  26   0   2     1040.42     1182.97       23.98 o
  27   0   2      255.29      227.02       11.92 o
  28   0   2      309.12      369.85       14.69 o
  29   0   2       76.54       64.45       10.24 o
  30   0   2       15.06       17.37       10.53 <
  31   0   2       44.64       40.88       14.92 o
  32   0   2       19.06       23.58       17.13 <
  33   0   2       11.37        4.55       12.30 <
  34   0   2       -6.95        0.05       15.10 <
  35   0   2       21.00       12.96       17.28 <
  36   0   2       50.85       45.11       25.68 <
  37   0   2       19.43       21.65       38.46 <
  38   0   2      -24.79        4.34       49.53 <
  39   0   2       51.17       64.82       18.35 <
  40   0   2       19.90       15.59       44.37 <
   1   1   2        2.58        0.94        0.75 o
   2   1   2      459.36      442.32        5.94 o
   3   1   2      159.60      154.45        3.45 o
   4   1   2        9.50       10.04        2.23 o
   5   1   2       33.22       31.94        2.93 o
   6   1   2        5.53        4.52        1.42 o
   7   1   2       23.77       21.18        5.40 o
   8   1   2        0.10        0.02        0.24 <
   9   1   2        0.92        2.52        0.25 <
  10   1   2      103.37       93.54        3.42 o
  11   1   2        5.00        0.46        1.59 o
  12   1   2      149.47      154.26        3.95 o
  13   1   2      817.09      839.21        9.61 o
  14   1   2       80.90       81.08        3.06 o
  15   1   2      105.45      106.09        3.47 o
  16   1   2       64.81       63.31        2.93 o
  17   1   2        6.97        9.12        2.76 <
  18   1   2        8.68       10.29        3.71 <
  19   1   2       15.50        9.30        5.65 <
  20   1   2        1.47        0.02        1.25 <
  21   1   2       -2.50        2.05        2.11 <
  22   1   2       10.71        7.20        6.55 <
  23   1   2       19.65       16.88        9.94 <
  24   1   2       26.97       16.36       15.35 <
  25   1   2        5.45        4.32        4.23 <
  26   1   2       17.29       13.33       12.45 <
  27   1   2        9.71        1.67        7.17 <
  28   1   2       31.78       26.26        8.63 o
  29   1   2        2.53        4.66        3.49 <
  30   1   2        8.66        1.91        9.68 <
  31   1   2       12.00        7.49        9.51 <
  32   1   2       -3.42        1.79        5.63 <
  33   1   2        6.32        0.52        8.57 <
  34   1   2      -10.04        0.04       11.88 <
  35   1   2       -0.25        0.17        1.90 <
  36   1   2       -7.58        1.46        8.27 <
  37   1   2       16.53        1.95       30.38 <
  38   1   2        9.05        7.05       19.66 <
  39   1   2       18.64       13.38       23.89 <
   0   2   2     3426.13     3415.02       53.41 o
   1   2   2      689.76      578.13        8.98 o
   2   2   2       47.48       42.05        3.64 o
   3   2   2      242.05      217.77        4.99 o
   4   2   2        4.85        5.79        1.35 o
   5   2   2       19.98       14.96        4.86 o
   6   2   2      100.20       89.85        3.18 o
   7   2   2        5.50        8.63        1.69 o
   8   2   2       80.12       69.61        2.91 o
   9   2   2       19.11       14.04        5.73 o
  10   2   2      388.32      405.82        5.89 o
  11   2   2      760.55      807.66        9.35 o
  12   2   2        5.69        0.25        1.85 o
  13   2   2       99.92      114.22        4.06 o
  14   2   2       21.24       16.66        7.10 o
  15   2   2      803.74      752.37       12.01 o
  16   2   2      129.89      127.71        5.16 o
  17   2   2       13.46        9.05        6.11 <
  18   2   2       77.81       65.76        4.37 o
  19   2   2       -0.82        1.52        0.75 <
  20   2   2        8.84       11.15        5.23 <
  21   2   2       -4.95        0.01        3.84 <
  22   2   2       -2.03        3.66        2.56 <
  23   2   2       34.01       42.81        5.85 o
  24   2   2       37.71       50.57        6.82 o
  25   2   2      161.27      183.03        7.83 o
  26   2   2      427.47      504.64       10.41 o
  27   2   2      107.16      115.95        7.14 o
  28   2   2      136.27      155.19        7.68 o
  29   2   2       31.90       26.43        9.82 o
  30   2   2        5.69        8.23        6.39 <
  31   2   2       22.11       14.85       14.56 <
  32   2   2       24.64       11.27       20.13 <
  33   2   2       38.01        3.84       15.23 <
  34   2   2       14.37        0.11       17.61 <
  35   2   2       12.71        5.08       10.44 <
  36   2   2       32.30       24.60        9.89 o
  37   2   2       27.56       15.40       25.89 <
  38   2   2       26.22        1.69       31.97 <
   1   3   2       17.48       10.38        4.94 o
   2   3   2      451.36      498.96        6.98 o
   3   3   2      171.42      178.24        4.49 o
   4   3   2        4.71        7.47        1.87 <
   5   3   2       78.62       85.94        3.23 o
   6   3   2        3.42       10.72        1.62 <
   7   3   2       46.62       38.70        3.14 o
   8   3   2       -1.90        3.32        1.32 <
   9   3   2       -0.32        0.13        0.40 <
  10   3   2      124.34      132.04        4.77 o
  11   3   2        8.09        4.37        4.06 <
  12   3   2      198.94      231.58        7.28 o
  13   3   2     1006.40     1076.27       16.36 o
  14   3   2      132.39      134.10        6.40 o
  15   3   2      178.10      188.75        7.23 o
  16   3   2       97.72       95.38        5.65 o
  17   3   2        9.41        9.27        4.78 <
  18   3   2       19.49       18.05        9.78 <
  19   3   2       21.07       21.70       10.12 <
  20   3   2       -3.65        0.00        2.41 <
  21   3   2        6.49        5.25        4.49 <
  22   3   2       13.44       13.70        7.89 <
  23   3   2       47.32       44.03        5.34 o
  24   3   2       63.46       54.18        5.00 o
  25   3   2       18.67       15.16       10.11 <
  26   3   2       47.77       39.42        6.76 o
  27   3   2       10.82        3.73       12.19 <
  28   3   2      101.70       87.09       10.51 o
  29   3   2       14.45       16.04       16.36 <
  30   3   2       15.69        7.64       22.15 <
  31   3   2       23.16       30.97       32.55 <
  32   3   2       -8.53        6.53       10.98 <
  33   3   2       12.32        3.63       18.84 <
  34   3   2       -8.84        0.03       15.91 <
  35   3   2       15.37        0.53       21.69 <
  36   3   2       -7.05        6.28       12.22 <
  37   3   2       42.43        6.89       13.57 o
   0   4   2      338.67      324.57       10.86 o
   1   4   2       91.32       88.11        4.63 o
   2   4   2        5.12        0.68        2.37 <
   3   4   2       17.41       13.39        8.29 <
   4   4   2       10.19        2.90        4.97 <
   5   4   2       -3.63        0.95        3.04 <
   6   4   2        2.33        2.68        1.93 <
   7   4   2       11.02        9.11        5.53 <
   8   4   2        4.15        5.04        3.54 <
   9   4   2        4.56        3.57        3.20 <
  10   4   2       36.32       34.28        6.76 o
  11   4   2      154.59      149.60        6.68 o
  12   4   2        1.08        0.41        2.24 <
  13   4   2       12.14       13.52        7.46 <
  14   4   2       -6.32        5.80        5.24 <
  15   4   2      145.77      135.29        6.63 o
  16   4   2       10.91        7.82        6.78 <
  17   4   2        8.91       20.49        5.60 <
  18   4   2        6.73        3.58        4.46 <
  19   4   2       -0.57        2.85        0.88 <
  20   4   2        0.11        0.32        0.93 <
  21   4   2        2.74        1.55        3.44 <
  22   4   2        0.32        0.61        0.73 <
  23   4   2        7.12        2.15        5.53 <
  24   4   2       15.24       18.06       11.77 <
  25   4   2       31.62       36.50        8.15 o
  26   4   2       77.16       76.00        8.14 o
  27   4   2       28.34       31.39       18.48 <
  28   4   2        8.21       20.85        8.42 <
  29   4   2        5.05        4.05        8.57 <
  30   4   2        3.47        2.06        8.01 <
  31   4   2       17.29        0.19       18.25 <
  32   4   2       11.90        0.34       15.77 <
  33   4   2       -6.11        2.73       13.71 <
  34   4   2       -1.26        0.07        6.59 <
   1   5   2       25.94        9.41       11.45 <
   2   5   2      284.20      300.74        7.70 o
   3   5   2       87.22       82.64        5.43 o
   4   5   2        3.79        1.58        3.13 <
   5   5   2       50.46       44.03        5.95 o
   6   5   2        4.54        2.37        4.07 <
   7   5   2        7.21       11.91        5.50 <
   8   5   2       -0.05        0.01        0.99 <
   9   5   2       11.74       15.20        8.19 <
  10   5   2       70.91       67.19        6.14 o
  11   5   2        8.00        2.86        6.75 <
  12   5   2      151.08      159.94        7.64 o
  13   5   2      589.70      661.67       13.69 o
  14   5   2      108.84      108.68        8.52 o
  15   5   2      154.52      135.85        9.35 o
  16   5   2       51.43       61.61        6.98 o
  17   5   2        4.58       15.12        6.53 <
  18   5   2        8.00        5.42        7.22 <
  19   5   2        1.63        2.96        3.08 <
  20   5   2        2.53        0.13        4.91 <
  21   5   2       20.53        5.88       14.35 <
  22   5   2       16.24        2.76       11.02 <
  23   5   2       33.53       26.64        8.32 o
  24   5   2       74.14       58.44        7.68 o
  25   5   2       24.73       16.43       19.17 <
  26   5   2       35.01       27.78       10.16 o
  27   5   2       12.41        3.96       11.59 <
  28   5   2       94.62       76.88        8.60 o
  29   5   2        9.93       11.15        9.43 <
  30   5   2       29.83       17.06       18.22 <
   0   6   2       -3.79        4.77        7.11 <
   1   6   2        4.74        2.94        6.21 <
   2   6   2       15.69        6.09       12.87 <
   3   6   2        3.75        2.55        4.55 <
   4   6   2        0.09        0.01        1.01 <
   5   6   2        4.19        4.01        4.61 <
   6   6   2       -3.47        0.31        5.13 <
   7   6   2       11.84        7.95       12.93 <
   8   6   2       -6.87        0.99        8.49 <
   9   6   2       18.79       10.01       14.08 <
  10   6   2       -3.28        1.54        4.68 <
  11   6   2        6.76        4.49        9.41 <
  12   6   2       13.71        6.04       13.21 <
  13   6   2       12.89        0.01       15.35 <
  14   6   2        8.58        2.80        7.70 <
  15   6   2       12.53        2.54        6.64 <
  16   6   2       -0.32        5.21        1.42 <
  17   6   2        2.53        8.76        5.61 <
  18   6   2       -0.79        3.26        1.36 <
  19   6   2       -3.28        7.97        4.72 <
  20   6   2       13.33        0.70       11.44 <
  21   6   2       13.16        1.41       13.90 <
  22   6   2       10.42        0.05       12.45 <
  23   6   2        8.84        1.63        6.47 <
  24   6   2       21.48        3.26       18.02 <
  25   6   2       13.48        0.17       11.76 <
   1   7   2        8.37        1.39       10.15 <
   2   7   2       99.89      110.38       10.90 o
   3   7   2       23.22       14.15       19.78 <
   4   7   2       12.24       15.15       10.04 <
   5   7   2       23.45       11.11       23.71 <
   6   7   2       16.42        0.62       15.34 <
   7   7   2        3.85        0.84        6.76 <
   8   7   2        0.25        1.16        1.30 <
   9   7   2        5.37       15.19        6.33 <
  10   7   2       22.55       15.81       15.98 <
  11   7   2       17.69        0.92       17.46 <
  12   7   2       66.75       68.88        8.38 o
  13   7   2      176.77      190.12       10.32 o
  14   7   2       63.70       58.66        8.66 o
  15   7   2       46.33       45.30       10.40 o
  16   7   2        2.21       19.68        6.46 <
  17   7   2       27.16        7.19       20.40 <
   1   1   3       47.38       51.85        3.18 o
   2   1   3      721.28      712.29        9.74 o
   3   1   3      321.22      298.55        5.87 o
   4   1   3       48.82       35.67        3.05 o
   5   1   3      445.45      465.74        7.07 o
   6   1   3        0.88        0.48        0.37 <
   7   1   3       87.90       96.99        3.48 o
   8   1   3      116.46      112.46        4.13 o
   9   1   3      575.08      611.34        8.22 o
  10   1   3      157.87      174.49        4.87 o
  11   1   3      482.59      544.46        8.28 o
  12   1   3      466.63      493.21        8.98 o
  13   1   3      693.93      715.21       11.51 o
  14   1   3      339.45      385.76        8.37 o
  15   1   3        5.73       10.18        3.82 <
  16   1   3      342.66      371.46        8.60 o
  17   1   3      602.38      644.17       11.71 o
  18   1   3       23.53       21.42       11.50 <
  19   1   3       46.48       49.48        5.87 o
  20   1   3       12.04        4.20        8.50 <
  21   1   3      111.55      116.60        7.61 o
  22   1   3       16.92       31.17       12.94 <
  23   1   3      131.21      128.20        7.30 o
  24   1   3       56.36       71.11        6.37 o
  25   1   3       51.85       41.73        7.09 o
  26   1   3       90.23       99.91        7.62 o
  27   1   3       17.11       18.54       10.59 <
  28   1   3       97.39      112.11        7.95 o
  29   1   3       12.32       13.41        7.72 <
  30   1   3        4.32        0.17        5.39 <
  31   1   3       44.79       49.42        9.45 o
  32   1   3       10.99        0.14       11.03 <
  33   1   3       31.59       19.78       20.89 <
  34   1   3        8.28        6.75       10.77 <
  35   1   3       16.42       13.91       21.28 <
  36   1   3       17.53        0.37       19.78 <
  37   1   3      114.10      111.71       12.73 o
   0   2   3      304.61      327.21        8.34 o
   1   2   3      245.48      249.59        5.48 o
   2   2   3      114.21      122.24        3.97 o
   3   2   3      129.69      113.24        4.41 o
   4   2   3      372.20      398.08        6.62 o
   5   2   3       24.19       17.55        9.15 <
   6   2   3       31.00       29.02       11.20 <
   7   2   3        1.67        5.16        1.29 <
   8   2   3      117.00      110.23        5.11 o
   9   2   3        4.78        1.79        3.30 <
  10   2   3       97.97       91.29        5.73 o
  11   2   3      131.61      123.71        6.29 o
  12   2   3        7.16        5.30        4.68 <
  13   2   3       23.55       22.28       11.98 <
  14   2   3        0.41        6.05        0.65 <
  15   2   3      124.08      116.82        6.98 o
  16   2   3       18.36       16.49       10.50 <
  17   2   3        8.08        2.61        5.93 <
  18   2   3       50.54       62.09        6.60 o
  19   2   3        0.54        0.06        0.82 <
  20   2   3        6.54       14.94        5.06 <
  21   2   3        3.10        5.92        5.53 <
  22   2   3       60.82       51.75        7.91 o
  23   2   3        7.40        1.56        6.16 <
  24   2   3       93.99       98.24        6.95 o
  25   2   3       53.17       45.18        8.25 o
  26   2   3       44.32       29.89        7.91 o
  27   2   3       53.95       40.07        7.98 o
  28   2   3        5.05        1.28        7.26 <
  29   2   3       52.35       40.70       13.40 o
  30   2   3       73.67       76.52        9.96 o
  31   2   3       10.42        0.00       12.50 <
  32   2   3       11.45        9.51       13.18 <
  33   2   3        4.95        3.51       10.43 <
  34   2   3       22.00        6.06       18.17 <
  35   2   3       21.24        1.44       21.49 <
  36   2   3       29.45       14.17       21.02 <
   1   3   3       19.79       18.44       11.52 <
   2   3   3       86.39       73.79        5.49 o
   3   3   3       50.75       56.86        5.02 o
   4   3   3       18.48       15.30        9.95 <
   5   3   3       63.01       62.86        5.14 o
   6   3   3       -2.95        0.79        2.43 <
   7   3   3       11.79       14.79        6.83 <
   8   3   3       28.43       22.80       15.42 <
   9   3   3       79.86       90.39        5.84 o
  10   3   3       34.22       31.55        7.20 o
  11   3   3       56.67       57.65        5.41 o
  12   3   3      111.97      103.64        6.68 o
  13   3   3      202.37      208.81        7.81 o
  14   3   3       84.83       85.43        6.06 o
  15   3   3        3.07        0.40        2.65 <
  16   3   3       87.94       82.43        6.23 o
  17   3   3      114.70      114.01        6.73 o
  18   3   3        6.63        5.87        6.66 <
  19   3   3        1.90       14.18        3.26 <
  20   3   3        1.30        2.52        2.20 <
  21   3   3       28.78       26.86       14.39 <
  22   3   3       15.08       16.48        9.97 <
  23   3   3       30.46       35.91       16.37 <
  24   3   3       13.58       14.51       13.35 <
  25   3   3        9.22       18.19        9.86 <
  26   3   3       21.29       28.39       15.50 <
  27   3   3       -3.54        6.85        7.04 <
  28   3   3       12.00       26.33       14.50 <
  29   3   3        3.71        7.91        8.47 <
  30   3   3       -5.47        0.33        9.32 <
  31   3   3       11.37       15.72        8.79 <
  32   3   3        2.95        0.08        9.74 <
  33   3   3       30.11        3.89       27.44 <
  34   3   3       34.43        3.57       19.45 <
   0   4   3      246.37      249.98       12.70 o
   1   4   3      212.68      227.66        8.47 o
   2   4   3       72.01       59.57        5.97 o
   3   4   3       87.44       75.05        6.23 o
   4   4   3      272.37      294.97        9.27 o
   5   4   3       12.32       11.78        7.97 <
   6   4   3       30.07       26.52       14.46 <
   7   4   3       16.42       15.08        9.44 <
   8   4   3       71.38       68.55        6.67 o
   9   4   3       -6.26        1.11        5.17 <
  10   4   3       65.86       66.47        6.31 o
  11   4   3       93.39       83.41        6.69 o
  12   4   3        8.90        3.64        7.25 <
  13   4   3       18.95       15.93       13.86 <
  14   4   3       11.90        7.40        9.48 <
  15   4   3       91.91       83.30        6.84 o
  16   4   3       20.79       19.84       12.21 <
  17   4   3       -2.27        3.49        3.33 <
  18   4   3       38.98       53.12        8.25 o
  19   4   3        8.95        1.14        8.35 <
  20   4   3       21.48       14.53       13.40 <
  21   4   3       11.81        8.15        8.44 <
  22   4   3       55.41       66.75        7.46 o
  23   4   3        3.97        1.41        4.88 <
  24   4   3      104.03       99.18        7.52 o
  25   4   3       59.93       59.65        7.73 o
  26   4   3       59.44       47.85        9.02 o
  27   4   3       78.65       66.54        9.50 o
  28   4   3       24.72        3.70       23.82 <
  29   4   3       49.98       55.84       12.79 o
  30   4   3      136.13       98.36       17.77 o
  31   4   3       12.53        0.00       17.15 <
  32   4   3       63.17       17.76       23.37 <
   1   5   3       -3.63        8.11        3.46 <
   2   5   3       -2.61        4.07        4.11 <
   3   5   3       18.95       16.80       20.64 <
   4   5   3        3.16        9.68        6.22 <
   5   5   3        0.32        6.37        1.80 <
   6   5   3       -5.69        2.52        6.16 <
   7   5   3       -1.47        0.44        3.39 <
   8   5   3        0.53        3.13        1.62 <
   9   5   3        4.82        0.73        4.69 <
  10   5   3       12.87        1.97       12.87 <
  11   5   3        7.50        1.32        7.70 <
  12   5   3        8.84        3.40       10.64 <
  13   5   3       63.01       44.67        9.13 o
  14   5   3       15.40        2.79       13.97 <
  15   5   3        3.95        9.06        5.99 <
  16   5   3        5.37        4.74        8.27 <
  17   5   3       -2.97        0.82        3.97 <
  18   5   3        0.13        0.67        1.56 <
  19   5   3       -0.38        1.61        1.48 <
  20   5   3      -11.69        0.44        9.83 <
  21   5   3       12.69        2.69       12.47 <
  22   5   3        6.00        6.47        7.72 <
  23   5   3        2.05        6.53        4.45 <
  24   5   3       18.05        0.28       13.29 <
  25   5   3       22.85        8.22       23.35 <
  26   5   3        4.05        2.87        5.82 <
  27   5   3       10.27        0.56       13.25 <
   0   6   3      207.36      177.83       17.54 o
   1   6   3      131.08      124.55       12.34 o
   2   6   3       31.69        5.38       13.04 <
   3   6   3       56.01       32.30       10.58 o
   4   6   3      124.55      138.16       12.16 o
   5   6   3       10.32        8.66       12.37 <
   6   6   3       34.85       20.21       13.40 <
   7   6   3        0.32       23.54        1.40 <
   8   6   3       28.43       38.60       27.43 <
   9   6   3        6.95        2.29        8.93 <
  10   6   3       58.83       60.12       11.91 o
  11   6   3       46.98       52.29        9.34 o
  12   6   3       18.08        7.64       15.07 <
  13   6   3        9.63        9.52       10.82 <
  14   6   3       10.98        4.89       12.00 <
  15   6   3       30.26       40.75       20.57 <
  16   6   3       14.53       22.19       13.74 <
  17   6   3       15.48        2.16       17.05 <
  18   6   3       37.80       28.88       12.09 o
  19   6   3        1.00        5.71        2.71 <
  20   6   3        9.53        7.56        9.62 <
  21   6   3       17.16        8.15       15.99 <
  22   6   3       43.02       37.91       10.49 o
   1   7   3        6.32        1.04       12.20 <
   2   7   3       13.58        9.45       23.44 <
   3   7   3       -3.79        0.03        5.14 <
   4   7   3       -4.00        6.24        9.21 <
   5   7   3       27.37        1.13       25.65 <
   6   7   3       -3.58        0.08        4.96 <
   7   7   3        4.53        1.65        7.70 <
   8   7   3       -4.95        0.54       12.00 <
   9   7   3       16.53       16.70       25.53 <
  10   7   3       -2.32        0.23        7.54 <
  11   7   3       -7.66       14.01       13.10 <
   0   0   4      194.57      174.42       12.85 o
   1   0   4      446.70      440.94       12.60 o
   2   0   4       74.54       44.92        6.24 o
   3   0   4      304.06      271.85       12.04 o
   4   0   4       54.85       37.96        6.75 o
   5   0   4       85.70       92.73        7.54 o
   6   0   4       12.32        6.42        9.00 <
   7   0   4      120.45      106.16        8.03 o
   8   0   4      125.60      110.10        8.27 o
   9   0   4      245.26      268.34       13.63 o
  10   0   4      756.47      679.03       23.90 o
  11   0   4      373.18      423.13       15.64 o
  12   0   4       38.85       34.48       11.37 o
  13   0   4       84.02       70.49       13.58 o
  14   0   4        5.69        0.35        7.96 <
  15   0   4      636.45      652.62       32.22 o
  16   0   4      296.27      339.98       21.79 o
  17   0   4        1.58       21.91        2.34 <
  18   0   4      258.05      298.53       20.85 o
  19   0   4      138.34      122.18       12.56 o
  20   0   4       24.79        0.93       30.39 <
  21   0   4       36.17       30.33       10.18 o
  22   0   4       17.37        6.83       27.98 <
  23   0   4       57.96       59.62       12.45 o
  24   0   4       48.17       48.75       16.56 <
  25   0   4      141.98      132.00       15.35 o
  26   0   4       15.79       13.59       27.61 <
  27   0   4       88.28       85.41       13.74 o
  28   0   4       38.53        1.13       12.67 o
  29   0   4       27.95       21.95       28.70 <
  30   0   4        0.16        2.08        0.35 <
  31   0   4       49.90       45.26       13.55 o
  32   0   4        7.11        0.01       13.30 <
  33   0   4       20.21        9.21       20.09 <
  34   0   4       22.58        0.26       42.94 <
   1   1   4        3.32        1.94        2.50 <
   2   1   4       87.86       89.54        5.32 o
   3   1   4       70.96       66.44        5.11 o
   4   1   4       18.85       19.71       11.03 <
   5   1   4       29.37       30.72        9.45 o
   6   1   4       20.37       25.28       10.39 <
   7   1   4        3.79        1.20        3.94 <
   8   1   4       12.06        8.41        5.58 <
   9   1   4       -9.35        4.88        5.69 <
  10   1   4       24.64       27.76       11.20 <
  11   1   4        0.16        2.29        0.98 <
  12   1   4       30.16       34.49       20.42 <
  13   1   4        4.58        7.89        4.12 <
  14   1   4        8.21       20.10       10.02 <
  15   1   4        8.00        0.23        9.07 <
  16   1   4       11.13       17.40        6.99 <
  17   1   4        0.21        1.44        1.68 <
  18   1   4       11.90       11.39       11.49 <
  19   1   4        4.32        1.44        6.41 <
  20   1   4       21.79        6.11       22.48 <
  21   1   4        7.37        0.60        9.17 <
  22   1   4       26.53       15.58       20.98 <
  23   1   4       38.30       20.39        8.18 o
  24   1   4       18.64        5.90       15.45 <
  25   1   4       20.40        3.69       13.98 <
  26   1   4       22.43        7.76       18.26 <
  27   1   4        3.71        0.02        7.10 <
  28   1   4       36.64       15.97       10.30 o
  29   1   4       12.00        4.91       13.33 <
  30   1   4       13.50        0.06       14.92 <
  31   1   4       17.29       10.46       14.86 <
  32   1   4        9.16        5.30        9.83 <
  33   1   4       14.61        0.22       11.68 <
  34   1   4       24.32        0.87       24.51 <
   0   2   4       58.01       39.69        7.24 o
   1   2   4      157.82      154.48        6.76 o
   2   2   4       40.01       23.16        5.34 o
   3   2   4       90.12       73.76        5.61 o
   4   2   4       13.79        9.86        8.18 <
   5   2   4       30.59       32.98       13.07 <
   6   2   4        0.47        0.27        0.74 <
   7   2   4       48.64       41.28        7.15 o
   8   2   4       60.54       53.35        7.66 o
   9   2   4      107.26       99.69        6.96 o
  10   2   4      268.35      305.85        9.72 o
  11   2   4      172.71      185.21        8.57 o
  12   2   4       19.64       19.87       11.13 <
  13   2   4       26.43       28.53       15.06 <
  14   2   4        4.67        0.62        3.46 <
  15   2   4      268.60      292.16       10.18 o
  16   2   4      163.55      172.61        8.85 o
  17   2   4       13.58        8.43       12.52 <
  18   2   4      147.42      152.38        9.38 o
  19   2   4       38.30       54.81        7.38 o
  20   2   4       -8.13        1.48        6.67 <
  21   2   4       28.51       15.99       23.60 <
  22   2   4        2.92        2.27        4.50 <
  23   2   4       22.53       23.60       26.84 <
  24   2   4       19.35       29.92       16.61 <
  25   2   4       55.83       62.13        9.64 o
  26   2   4       10.11        3.96       12.10 <
  27   2   4       50.85       43.12        9.17 o
  28   2   4       15.00        0.10       17.71 <
  29   2   4       27.48        8.63       26.12 <
  30   2   4        5.13        0.87        6.67 <
  31   2   4       38.22       19.63        9.85 o
  32   2   4        9.16        0.23       13.17 <
  33   2   4       28.51        4.38       28.61 <
   1   3   4       13.63       10.15        6.98 <
   2   3   4      192.36      183.84        8.05 o
   3   3   4      158.14      161.97        7.34 o
   4   3   4       49.54       45.65        6.27 o
   5   3   4       85.41       81.90        6.79 o
   6   3   4       73.21       79.09        6.59 o
   7   3   4        4.36        1.85        4.35 <
   8   3   4       32.34       35.09        7.80 o
   9   3   4        0.76        7.76        1.02 <
  10   3   4       60.64       65.76        6.48 o
  11   3   4        0.63        3.00        1.12 <
  12   3   4       74.54       73.36        6.74 o
  13   3   4       17.25        8.63       10.55 <
  14   3   4       41.95       43.47        6.43 o
  15   3   4        0.13        0.73        1.37 <
  16   3   4       41.95       37.72        7.34 o
  17   3   4        3.24        1.40        3.00 <
  18   3   4       25.43       34.59       15.82 <
  19   3   4       -2.32        2.89        3.70 <
  20   3   4       11.37       26.82       15.49 <
  21   3   4       30.95        2.61       32.06 <
  22   3   4       49.80       51.94       10.51 o
  23   3   4       75.49       73.77       11.41 o
  24   3   4       36.43       23.01       10.39 o
  25   3   4       20.29       16.69       20.46 <
  26   3   4       17.14       27.25       15.35 <
  27   3   4      -15.08        0.24       14.74 <
  28   3   4       73.04       58.48       10.92 o
  29   3   4       32.69       22.47       10.77 o
  30   3   4        9.24        0.26       15.57 <
  31   3   4       61.04       44.67       16.49 o
   0   4   4       -0.11        2.43        1.54 <
   1   4   4       22.85       25.50       11.68 <
   2   4   4       22.99       13.02       17.43 <
   3   4   4       -1.58        2.81        2.48 <
   4   4   4        2.84        4.61        3.78 <
   5   4   4       -2.34        0.00        3.18 <
   6   4   4        7.33        0.96        5.55 <
   7   4   4        3.92        1.58        5.03 <
   8   4   4        9.03       18.20        8.13 <
   9   4   4       11.21        7.63       10.16 <
  10   4   4       60.01       66.30        7.88 o
  11   4   4       49.67       40.61        7.69 o
  12   4   4        7.11        7.69        6.45 <
  13   4   4       11.45        3.78       11.34 <
  14   4   4       -1.50        0.37        3.54 <
  15   4   4       52.22       60.27        9.86 o
  16   4   4       49.27       43.38        9.91 o
  17   4   4        6.74        0.25        9.83 <
  18   4   4       44.22       34.85       11.62 o
  19   4   4        1.79        3.81        4.52 <
  20   4   4       -2.95        2.37        8.08 <
  21   4   4       -9.16        0.31        7.75 <
  22   4   4       -3.79        0.52        6.62 <
  23   4   4      -13.27        0.20       19.51 <
  24   4   4        1.68       13.46        6.27 <
  25   4   4       -6.42        9.13       10.88 <
  26   4   4        9.08        0.00       13.40 <
  27   4   4        8.63        9.05       10.63 <
   1   5   4       17.69       16.93       19.64 <
   2   5   4      189.93      152.40       13.07 o
   3   5   4      151.82      153.99       12.04 o
   4   5   4       14.74       16.48       17.50 <
   5   5   4       87.49       80.82       10.71 o
   6   5   4       53.27       61.56       10.04 o
   7   5   4        3.90        0.31        7.08 <
   8   5   4        5.58       16.86        7.77 <
   9   5   4       13.90       12.57       13.57 <
  10   5   4       21.06       37.31       17.44 <
  11   5   4       12.53        5.09       15.09 <
  12   5   4       50.22       52.99       10.64 o
  13   5   4        1.05        3.91        2.60 <
  14   5   4       30.74       32.31       31.09 <
  15   5   4       -1.26        0.20        5.99 <
  16   5   4       25.16       24.25       27.67 <
  17   5   4        3.05        2.68        7.10 <
  18   5   4        4.63       18.35        7.01 <
  19   5   4       -3.16        2.36        7.41 <
  20   5   4       34.66       25.54        9.66 o
  21   5   4       -2.84        6.19        7.24 <
  22   5   4       42.26       36.75        8.60 o
  23   5   4       77.57       71.60       10.13 o
   0   6   4      -14.85        2.50       30.88 <
   1   6   4      -11.69        0.25       20.54 <
   2   6   4       13.58        6.29       22.38 <
   3   6   4       -9.48        4.49       14.38 <
   4   6   4       16.74        0.05       21.71 <
   5   6   4       13.69        6.58       20.73 <
   6   6   4       -0.84        4.00        2.53 <
   7   6   4       20.74        5.65       27.56 <
   8   6   4        3.58        1.43        6.63 <
   9   6   4       11.48        1.96       20.61 <
  10   6   4       -3.68        0.50       10.14 <
  11   6   4       -3.47        0.18        5.67 <
  12   6   4       13.16        0.02       20.87 <
  13   6   4        8.63        0.06       15.30 <
  14   6   4        1.90        0.01        6.89 <
  15   6   4      -21.48        0.41       21.90 <
   1   1   5       16.11        1.32       12.56 <
   2   1   5       10.34        4.37        8.04 <
   3   1   5        3.79        3.40        3.90 <
   4   1   5       24.72        7.96       13.51 <
   5   1   5        9.08        0.00        7.13 <
   6   1   5       32.01       34.53       10.90 <
   7   1   5       16.85        4.10       15.74 <
   8   1   5      196.57      252.11       11.86 o
   9   1   5      292.80      305.31       13.14 o
  10   1   5       11.37        0.77       10.87 <
  11   1   5      309.38      374.10       16.76 o
  12   1   5      148.61      146.85       12.96 o
  13   1   5       44.69       53.24       14.83 o
  14   1   5      125.55      115.90       12.40 o
  15   1   5       72.17       78.28       10.95 o
  16   1   5       66.49       51.16       10.95 o
  17   1   5      332.12      360.38       17.43 o
  18   1   5       81.33       99.66       11.50 o
  19   1   5       22.74       20.65       29.38 <
  20   1   5       81.65       95.17       11.84 o
  21   1   5        3.95        1.18       10.73 <
  22   1   5        9.00       11.73       11.75 <
  23   1   5        3.47        0.15        4.69 <
  24   1   5       22.27        2.53       30.45 <
  25   1   5       13.58        0.52       16.83 <
  26   1   5       12.16        0.91       18.03 <
  27   1   5       33.01        3.43       19.99 <
  28   1   5       15.63        2.91       24.09 <
  29   1   5       28.27        3.41       35.09 <
   0   2   5       16.42       11.99       18.12 <
   1   2   5       43.11       32.17        8.47 o
   2   2   5       77.07       75.23        7.31 o
   3   2   5       21.08        3.71       16.69 <
   4   2   5      158.03      147.93       10.47 o
   5   2   5       61.49       59.91        8.59 o
   6   2   5       15.06       10.55       14.37 <
   7   2   5       28.74       27.39       22.05 <
   8   2   5       -5.26        1.23        4.95 <
   9   2   5        0.74        0.02        1.22 <
  10   2   5        6.42        0.09        6.24 <
  11   2   5       -2.32        0.47        5.12 <
  12   2   5        3.37        0.11        3.17 <
  13   2   5        4.84        0.00        4.93 <
  14   2   5       -9.48        0.22       10.61 <
  15   2   5      -13.27        0.99       16.19 <
  16   2   5        6.95        1.31        9.21 <
  17   2   5      -13.90        0.30       17.13 <
  18   2   5       -6.00        0.04        7.91 <
  19   2   5      -11.53        0.33       15.84 <
  20   2   5        0.32        1.81        1.62 <
  21   2   5       25.43       30.05       34.82 <
  22   2   5       45.01       37.14       11.87 o
  23   2   5       16.42        2.77       24.98 <
  24   2   5       86.54       63.43       11.32 o
  25   2   5       69.28       12.78       14.08 o
  26   2   5       55.27        0.61       11.63 o
  27   2   5       42.01        8.71       13.11 o
  28   2   5       35.06        2.31       15.90 <
   1   3   5        3.41        0.39        3.03 <
   2   3   5        8.65        3.32        7.37 <
   3   3   5       -1.01        2.58        2.36 <
   4   3   5        0.19        7.28        1.16 <
   5   3   5       11.69        2.20       10.23 <
   6   3   5        7.82       12.01        7.66 <
   7   3   5        4.90        0.04        5.07 <
   8   3   5       61.12       65.38        7.83 o
   9   3   5       62.70       76.30        8.03 o
  10   3   5        7.74        0.53        8.27 <
  11   3   5       89.15       95.85        8.70 o
  12   3   5       51.06       61.11        9.50 o
  13   3   5       15.58       18.88        9.11 <
  14   3   5       39.48       56.43       12.80 o
  15   3   5       17.79       19.02       20.23 <
  16   3   5       45.17       18.67       11.75 o
  17   3   5       85.91       98.18       12.96 o
  18   3   5       40.11       30.57       17.82 <
  19   3   5      -17.53        4.13       23.19 <
  20   3   5       17.69       31.12       12.05 <
  21   3   5       13.11        0.14       18.33 <
  22   3   5       24.95        8.13       25.27 <
  23   3   5        9.79        0.34       15.50 <
  24   3   5       26.06        1.93       23.04 <
  25   3   5        6.00        0.32       16.79 <
   0   4   5       28.74       11.33       60.93 <
   1   4   5       52.12       56.87       12.62 o
   2   4   5       76.91       84.16       13.29 o
   3   4   5       21.90        3.87       13.66 <
   4   4   5      189.20      184.39       13.02 o
   5   4   5       75.38       71.10       10.32 o
   6   4   5       26.11       12.60       24.97 <
   7   4   5       40.75       35.52       12.39 o
   8   4   5       16.63        0.00       14.25 <
   9   4   5        4.53        0.07        6.03 <
  10   4   5        1.90        1.52        5.13 <
  11   4   5       -7.16        1.09       10.69 <
  12   4   5        6.74        0.87       12.27 <
  13   4   5       -6.21        0.01        7.80 <
  14   4   5       -3.68        0.10        6.09 <
  15   4   5       -9.58        2.68       14.91 <
  16   4   5        6.63        3.47       10.70 <
  17   4   5        0.53        0.23        1.64 <
  18   4   5      -19.11        1.52       28.87 <
  19   4   5      -12.79        0.65       21.82 <
  20   4   5       16.42        1.18       22.67 <
  21   4   5       70.44       40.71       14.65 o
   1   5   5      -13.58        0.39       19.69 <
   2   5   5      -10.90        1.22       18.20 <
   3   5   5       -6.16        0.04        9.23 <
   4   5   5       -4.74        8.41        6.99 <
   5   5   5        4.11        2.21        7.87 <
   6   5   5        3.90        3.83        7.48 <
   7   5   5        7.16        3.37       10.87 <
   8   5   5        3.58        3.79       10.56 <
   9   5   5        6.84        1.27       14.73 <
  10   5   5       12.63        0.67       16.29 <
  11   5   5       -6.00        3.23       11.91 <
  12   5   5       13.06       12.53       22.12 <
  13   5   5       13.06        4.19       17.01 <
  14   5   5       22.32       14.60       21.25 <
  15   5   5       -8.74        0.13       14.58 <
   0   0   6       80.54       64.36       18.00 o
   1   0   6        1.74        1.38        4.98 <
   2   0   6        9.48        5.53       15.71 <
   3   0   6        7.42        3.04       14.47 <
   4   0   6       17.69        1.62       23.99 <
   5   0   6      124.76      127.36       19.58 o
   6   0   6       98.23      113.73       18.32 o
   7   0   6      207.83      213.07       23.37 o
   8   0   6       28.11        2.42       56.22 <
   9   0   6      185.72      166.92       21.79 o
  10   0   6      124.45      110.29       19.27 o
  11   0   6       10.11       24.56       19.81 <
  12   0   6       21.16       10.66       42.32 <
  13   0   6       18.64        9.84       37.27 <
  14   0   6       -2.21        4.03        4.25 <
  15   0   6       55.91       48.75       17.37 o
  16   0   6       29.37       64.65       61.10 <
  17   0   6       34.74       37.19       17.06 <
  18   0   6       34.74       28.85       17.06 <
  19   0   6       80.23      104.02       19.27 o
  20   0   6       72.65       35.43       19.27 o
  21   0   6       67.91       72.59       19.58 o
  22   0   6       34.43       14.40       18.32 <
   1   1   6       -8.05        0.41        7.92 <
   2   1   6        6.74        4.83        7.12 <
   3   1   6       12.84        7.55       13.90 <
   4   1   6       12.32        6.01        8.94 <
   5   1   6       -5.26        0.59        6.67 <
   6   1   6       19.16       15.84       18.11 <
   7   1   6       22.11        9.60       29.99 <
   8   1   6       29.53       10.84       31.08 <
   9   1   6       -3.63        2.04        4.52 <
  10   1   6       11.21        2.18       16.02 <
  11   1   6        6.63        0.16       16.66 <
  12   1   6       23.06        0.14       31.96 <
  13   1   6        7.90        3.46       16.74 <
  14   1   6        4.90        0.03        6.97 <
  15   1   6       -2.21        0.37        4.60 <
  16   1   6       -6.63        0.25       11.87 <
  17   1   6      -14.53        0.01       17.10 <
  18   1   6      -21.16        5.66       19.53 <
  19   1   6        8.69        6.20       14.00 <
  20   1   6       -8.69        9.89       15.50 <
  21   1   6        8.69        1.58       12.75 <
  22   1   6       36.80        6.67       13.79 <
   0   2   6       30.64       33.85       61.28 <
   1   2   6        0.42        3.41        1.74 <
   2   2   6       -5.58        2.28        7.33 <
   3   2   6        1.90        0.39        5.24 <
   4   2   6        4.42        0.10        6.31 <
   5   2   6       76.02       67.45       10.31 o
   6   2   6       52.96       52.07        9.82 o
   7   2   6      124.66      122.69       11.56 o
   8   2   6       12.21        1.40       13.19 <
   9   2   6       82.33       98.25       10.59 o
  10   2   6       65.86       60.79       12.30 o
  11   2   6       14.53       11.11       19.63 <
  12   2   6      -13.58        7.59       17.49 <
  13   2   6       16.11        5.19       22.96 <
  14   2   6      -21.48        2.92       16.48 <
  15   2   6       25.27       23.44       36.99 <
  16   2   6       44.38       39.48       12.41 o
  17   2   6       13.74       23.24       21.08 <
  18   2   6        3.47       15.78        5.46 <
  19   2   6       49.59       61.25       13.21 o
  20   2   6       33.01       17.80       15.84 <
   1   3   6        7.26        2.34       13.81 <
   2   3   6       39.01       14.33       12.84 o
   3   3   6       17.69       26.31       26.70 <
   4   3   6       30.43       23.00       18.21 <
   5   3   6       12.21        0.98       13.09 <
   6   3   6       79.07       68.00       10.69 o
   7   3   6       33.90       35.96       12.93 <
   8   3   6       56.01       49.19       10.27 o
   9   3   6       -7.05        5.71        8.32 <
  10   3   6        1.05        8.25        5.16 <
  11   3   6       17.27        0.23       20.68 <
  12   3   6       -4.26        0.01       11.72 <
  13   3   6        7.26       13.31       19.77 <
  14   3   6       -2.37        0.13        3.52 <
  15   3   6       34.59        0.79       20.85 <
  16   3   6       -8.37        0.61       15.24 <
   0   4   6       17.06        6.08       40.93 <
   1   4   6      -20.69        4.36       32.77 <
   2   4   6       -0.63        0.79        1.31 <
   3   4   6      -14.21        0.88       22.91 <
   4   4   6      -15.79        0.06       24.77 <
   5   4   6        7.42        6.78       12.60 <
   6   4   6      -20.85        4.28       19.84 <
   7   4   6       16.00       26.17       20.62 <
   8   4   6        4.84        0.01        9.48 <
   9   4   6       30.74       27.87       31.07 <
   1   1   7        0.32        3.08        3.30 <
   2   1   7       24.00        5.75       40.81 <
   3   1   7       48.80       52.94       14.08 o
   4   1   7       23.37       22.42       24.12 <
   5   1   7        9.32       23.08       19.94 <
   6   1   7       -8.21        2.24       16.13 <
   7   1   7      -21.79        6.19       48.82 <
