# Supplementary material for: Competition between hydrogen bonding and dispersion interactions in the crystal structures of the primary amines
Source: Royal Society of Chemistry journal article supplement (doi:10.1039/c3ce42639d), 2014-01-01
Supplement: c3ce42639d10.fcf [file c3ce42639d10.fcf]

data_propylamine 
#  Propylamine in Pbcn at 150K                         
_audit_creation_date        "10-11-30"
_audit_creation_method      CRYSTALS 

_cell_length_a                    23.327(3)
_cell_angle_alpha                 90
_cell_length_b                    6.2975(11)
_cell_angle_beta                  90
_cell_length_c                    5.9861(9)
_cell_angle_gamma                 90

# NOTE FO on scale of Fc,      3.52096
# Status flags: 
#    o - used in refinement 
#    < - excluded by I/sigmaI cutoff 
#    x - excluded for another reason  

loop_
_refln_index_h
_refln_index_k
_refln_index_l
_refln_F_squared_meas
_refln_F_squared_calc
_refln_F_squared_sigma
_refln_observed_status
   2   0   0     3287.94     1770.82      120.30 o
   4   0   0      851.81      434.43       31.38 o
   6   0   0     1229.51      742.50       45.37 o
   8   0   0       72.61       29.86        3.49 o
  10   0   0     1364.06      771.89       44.34 o
  12   0   0      195.63       84.46       10.13 x
  14   0   0        3.29        1.11        1.49 o
  16   0   0       25.82       28.23        2.44 o
  18   0   0     2736.06     1606.88       88.88 o
  20   0   0      809.57      463.25       27.56 o
  22   0   0       26.34       13.74        5.20 o
  24   0   0       15.74       12.04        6.07 o
   1   1   0       -0.84        0.02        0.04 o
   3   1   0       97.38       87.88        5.04 o
   5   1   0       30.70       34.28        2.13 o
   7   1   0        7.56        4.52        3.08 o
   9   1   0     2231.92     1409.31       64.80 o
  11   1   0      354.49      244.03       10.97 o
  13   1   0       28.22       12.77        1.86 o
  15   1   0        4.59        5.61        1.62 o
  17   1   0        1.20        3.67        0.99 o
  19   1   0        3.16        4.18        2.30 o
  21   1   0       -0.99        0.00        0.59 o
  23   1   0        1.65        0.45        1.67 o
  25   1   0        0.62        1.16        0.80 o
   0   2   0    12167.41    13472.43      552.06 o
   2   2   0      448.75      493.14       14.97 o
   4   2   0       14.91       15.71        1.73 o
   6   2   0      133.77      108.28        5.13 o
   8   2   0       22.01       25.26        1.88 o
  10   2   0      275.05      252.64       11.70 o
  12   2   0       11.25        7.01        4.98 o
  14   2   0        2.52        4.09        1.27 o
  16   2   0        0.94        2.42        0.37 o
  18   2   0      709.40      682.26       24.36 o
  20   2   0      191.08      185.86        9.36 o
  22   2   0        3.80        4.95        3.41 o
  24   2   0        4.93        6.29        4.56 o
   1   3   0        9.30        7.96        4.33 o
   3   3   0       50.74       57.59        2.90 o
   5   3   0        2.36        2.70        1.05 o
   7   3   0       56.62       47.58        3.28 o
   9   3   0     1338.49     1332.77       43.97 o
  11   3   0      317.80      330.78       11.56 o
  13   3   0       16.89        8.45        3.10 o
  15   3   0       10.35        7.68        5.25 o
  17   3   0        6.07        4.81        5.28 o
  19   3   0        8.80        8.18        8.39 o
  21   3   0        2.15        0.05        2.41 o
  23   3   0        0.12        2.21        1.06 o
   0   4   0      921.79      836.85       43.36 o
   2   4   0       63.01       52.19        3.51 o
   4   4   0        0.19        0.76        0.29 o
   6   4   0       -0.31        0.02        0.40 o
   8   4   0       11.59       12.39        5.90 o
  10   4   0       45.22       41.15        3.41 o
  12   4   0        2.23        5.15        1.67 o
  14   4   0       -0.62        0.10        0.55 o
  16   4   0        2.54        0.36        2.65 o
  18   4   0      103.76       97.12        7.98 o
  20   4   0       13.45       18.60        6.41 o
   1   5   0       -1.36        0.67        1.23 o
   3   5   0        5.58        4.05        5.56 o
   5   5   0        8.24        4.05        9.03 o
   7   5   0       35.46       35.37        4.89 o
   9   5   0      575.48      531.99       29.32 o
  11   5   0      163.46      155.11       10.83 o
  13   5   0       -1.45        2.21        1.34 o
  15   5   0       -6.51        0.22        6.19 o
  17   5   0        7.07        1.49        4.65 o
   0   6   0        7.31        0.33       11.41 o
   2   6   0       -4.90        0.01        4.48 o
   4   6   0       -0.19        0.90        1.08 o
   6   6   0       10.72        2.42        6.14 o
   8   6   0        2.60        7.72        3.90 o
  10   6   0        5.27        5.54        6.54 o
  12   6   0       17.23        7.49        5.95 o
   2   1   1    10107.71    11288.69      203.80 o
   3   1   1       23.04       28.89        1.16 o
   4   1   1      114.26      136.99        2.77 o
   5   1   1      315.42      324.77        7.67 o
   6   1   1     1088.69     1048.71       23.75 o
   7   1   1       24.02       22.10        1.07 o
   8   1   1      205.24      241.61        5.29 o
   9   1   1      916.01      719.03       20.19 o
  10   1   1      303.10      222.32        6.18 o
  11   1   1       64.02       50.14        1.84 o
  12   1   1      821.51      781.46       15.18 o
  13   1   1      122.04       91.89        2.93 o
  14   1   1       29.82       27.53        1.51 o
  15   1   1       24.38       28.91        1.57 o
  16   1   1      805.19      679.71       15.73 o
  17   1   1        2.32        0.30        1.03 o
  18   1   1      278.89      273.73        6.45 o
  19   1   1       13.95       10.23        2.23 o
  20   1   1      356.20      300.31        8.45 o
  21   1   1        1.28        0.34        0.99 o
  22   1   1       42.98       30.83        2.72 o
  23   1   1        3.63        1.73        2.42 o
  24   1   1        4.82        5.40        3.46 o
  25   1   1        3.16        3.68        2.93 o
   0   2   1      212.32      214.87        8.88 o
   1   2   1      268.17      320.34        7.69 o
   2   2   1        2.17        2.14        0.58 o
   3   2   1      166.02      206.12        4.66 o
   4   2   1       91.94       92.01        2.69 o
   5   2   1       50.78       63.12        1.89 o
   6   2   1        9.44       11.02        3.47 o
   7   2   1      951.33     1015.87       20.75 o
   8   2   1        5.08        4.89        1.66 o
   9   2   1      104.35      134.53        3.26 o
  10   2   1       -0.33        0.06        0.20 o
  11   2   1      529.29      472.55       11.91 o
  12   2   1        1.48        0.24        0.55 o
  13   2   1       66.82       58.99        2.45 o
  14   2   1       10.65        8.18        3.51 o
  15   2   1        5.14        3.17        2.37 o
  16   2   1        4.36        3.91        1.88 o
  17   2   1       15.08       14.95        2.55 o
  18   2   1       12.27        7.51        4.66 o
  19   2   1       17.13       10.93        2.95 o
  20   2   1        7.34        3.99        3.72 o
  21   2   1       31.61       27.02        2.65 o
  22   2   1       -1.17        1.89        0.96 o
  23   2   1        1.88        2.08        1.71 o
  24   2   1        6.20        2.14        4.96 o
   1   3   1        3.16        5.14        1.42 o
   2   3   1      806.38      781.86       20.31 o
   3   3   1        7.81       10.86        2.98 o
   4   3   1       37.56       34.28        1.97 o
   5   3   1       30.00       30.23        1.66 o
   6   3   1      147.79      162.35        4.22 o
   7   3   1       -0.37        0.02        0.28 o
   8   3   1       14.52       14.03        1.74 o
   9   3   1      141.92      113.06        4.25 o
  10   3   1       16.97       11.39        1.83 o
  11   3   1       13.48       10.06        1.78 o
  12   3   1      127.61      135.66        4.71 o
  13   3   1       14.35       13.28        2.28 o
  14   3   1       17.09       13.73        2.43 o
  15   3   1        4.45        7.15        2.89 o
  16   3   1      135.36      138.57        5.43 o
  17   3   1        3.10        0.57        1.49 o
  18   3   1       46.61       42.99        3.04 o
  19   3   1        7.42        3.22        4.44 o
  20   3   1       75.73       73.09        4.15 o
  21   3   1        3.39        0.84        2.69 o
  22   3   1        5.23        6.27        4.30 o
  23   3   1       -5.38        0.75        3.60 o
   0   4   1       75.91       78.05        4.81 o
   1   4   1      115.25      116.02        4.41 o
   2   4   1        0.72        2.83        0.38 o
   3   4   1       49.53       62.02        2.85 o
   4   4   1       32.83       29.26        2.42 o
   5   4   1       51.50       50.68        2.63 o
   6   4   1        4.39        5.90        1.73 o
   7   4   1      358.77      359.30        9.81 o
   8   4   1        1.22        1.63        1.03 o
   9   4   1       49.23       39.98        2.70 o
  10   4   1        0.99        0.22        0.45 o
  11   4   1      271.45      239.47        7.91 o
  12   4   1       -1.36        0.04        1.00 o
  13   4   1       66.10       56.86        3.67 o
  14   4   1        5.60        6.48        3.84 o
  15   4   1        0.93        5.50        0.63 o
  16   4   1        0.85        2.09        0.56 o
  17   4   1        6.86       11.52        4.38 o
  18   4   1       11.59        8.05        6.12 o
  19   4   1       12.38       10.46        6.93 o
  20   4   1        5.93        4.23        4.50 o
   1   5   1        3.12        2.14        2.13 o
   2   5   1       42.03       29.12        2.88 o
   3   5   1        0.00        3.75        0.53 o
   4   5   1        4.44        5.09        3.20 o
   5   5   1        3.42        0.97        2.71 o
   6   5   1       17.48       14.61        2.51 o
   7   5   1        1.71        0.47        1.51 o
   8   5   1        0.69        2.04        0.51 o
   9   5   1        3.60        5.88        2.93 o
  10   5   1        6.79        4.74        5.42 o
  11   5   1       -0.43        0.44        0.66 o
  12   5   1        9.36        8.71        6.61 o
  13   5   1        2.05        0.40        1.56 o
  14   5   1        4.62        5.92        4.59 o
  15   5   1       -4.00        0.82        3.36 o
  16   5   1        6.82       11.03        5.82 o
  17   5   1       -1.55        0.63        2.31 o
   0   6   1       38.93       19.12        7.31 o
   1   6   1       16.46       14.42        3.52 o
   2   6   1       -0.15        1.06        0.30 o
   3   6   1       16.33       18.62        3.22 o
   4   6   1        8.52        7.60        6.61 o
   5   6   1       33.26       37.99        3.60 o
   6   6   1        2.14        4.06        1.93 o
   7   6   1      145.57      125.75        7.16 o
   8   6   1        1.21        0.02        1.53 o
   9   6   1       12.31       10.10        8.52 o
  10   6   1        1.45        0.21        2.03 o
  11   6   1       85.62       70.01        6.78 o
  12   6   1        0.08        0.80        1.01 o
   0   0   2    11126.44    12076.42      416.80 o
   2   0   2      698.64      649.97       23.34 o
   3   0   2      110.43      101.01        4.59 o
   4   0   2       41.68       35.56        2.09 o
   5   0   2       -0.57        0.04        0.14 o
   6   0   2      433.96      559.95       12.07 o
   7   0   2     1141.16     1244.30       30.56 o
   8   0   2       20.66       21.11        1.60 o
   9   0   2       98.99      127.10        3.65 o
  10   0   2       83.91       95.31        3.35 o
  11   0   2      752.78      656.68       20.68 o
  12   0   2       49.05       30.73        2.66 o
  13   0   2       57.94       60.74        3.39 o
  14   0   2       26.26       29.69        2.46 o
  15   0   2       18.17       20.61        2.31 o
  16   0   2        3.32        1.18        2.01 o
  17   0   2       44.90       48.86        3.38 o
  18   0   2      687.50      693.31       21.39 o
  19   0   2       10.44        7.89        5.77 o
  20   0   2      210.13      209.50        8.08 o
  21   0   2        3.07        0.01        3.00 o
  22   0   2       -0.60        0.94        0.82 o
  23   0   2        7.14        5.14        5.10 o
  24   0   2       28.04       26.17        3.54 o
   1   1   2        0.62        2.01        0.10 o
   2   1   2      193.97      201.04        4.01 o
   3   1   2       36.29       36.00        1.39 o
   4   1   2        7.38        3.95        1.71 o
   5   1   2        0.85        0.04        0.16 o
   6   1   2       73.64       33.85        7.44 x
   7   1   2        7.23        7.31        2.26 o
   8   1   2        6.98        7.36        2.13 o
   9   1   2      453.04      477.28        9.93 o
  10   1   2        1.24        0.00        0.51 o
  11   1   2       72.92       86.84        2.38 o
  12   1   2        5.21        5.15        1.84 o
  13   1   2        2.36        0.76        0.96 o
  14   1   2        1.88        2.93        0.81 o
  15   1   2        6.84        7.26        2.81 o
  16   1   2        9.35        9.44        3.65 o
  17   1   2        0.12        1.36        0.37 o
  18   1   2        6.76        4.31        3.75 o
  19   1   2       -0.62        1.38        0.36 o
  20   1   2        6.14        5.64        3.40 o
  21   1   2       -2.96        0.00        1.79 o
  22   1   2        4.02        3.29        2.57 o
  23   1   2        0.62        0.58        0.43 o
  24   1   2        1.36        0.19        1.34 o
   0   2   2     2191.28     2260.54       62.98 o
   1   2   2       24.17       17.29        1.34 o
   2   2   2      156.33      172.53        3.39 o
   3   2   2        6.66        5.48        1.82 o
   4   2   2       56.47       55.18        1.81 o
   5   2   2        5.93        8.42        1.69 o
   6   2   2      127.59      146.34        3.44 o
   7   2   2      363.56      381.82        8.10 o
   8   2   2       13.70       17.46        1.74 o
   9   2   2       28.55       38.58        1.66 o
  10   2   2       32.91       29.64        1.81 o
  11   2   2      252.21      212.85        6.14 o
  12   2   2       10.07        9.93        3.77 o
  13   2   2       22.64       23.88        1.91 o
  14   2   2       13.38       21.28        1.95 o
  15   2   2        3.90        4.51        1.79 o
  16   2   2        0.54        0.13        0.38 o
  17   2   2       16.87       23.44        2.17 o
  18   2   2      275.95      300.38        6.93 o
  19   2   2        6.91        6.56        3.50 o
  20   2   2       86.01       85.45        3.43 o
  21   2   2       -0.06        0.04        0.44 o
  22   2   2        1.79        0.11        1.52 o
  23   2   2        2.73        1.15        2.16 o
   1   3   2       -1.41        0.02        0.76 o
   2   3   2      204.82      198.79        6.53 o
   3   3   2       38.99       40.11        2.34 o
   4   3   2        9.99       12.08        4.31 o
   5   3   2        7.54        8.22        3.54 o
   6   3   2       31.45       31.34        2.07 o
   7   3   2       39.69       36.42        2.31 o
   8   3   2        8.50        9.38        3.63 o
   9   3   2      554.70      549.96       14.49 o
  10   3   2       -1.52        0.01        0.89 o
  11   3   2      123.60      135.86        4.46 o
  12   3   2        1.82        5.90        1.24 o
  13   3   2        0.02        0.01        0.38 o
  14   3   2        3.95        2.54        1.98 o
  15   3   2       15.54       15.78        2.67 o
  16   3   2       36.04       25.91        2.89 o
  17   3   2        2.43        2.17        1.73 o
  18   3   2       14.83       11.63        2.76 o
  19   3   2        3.15        2.55        3.01 o
  20   3   2       24.96       16.09        3.13 o
  21   3   2       -3.68        0.10        3.42 o
  22   3   2       14.03       10.90        4.01 o
   0   4   2      198.40      175.76        9.37 o
   1   4   2       12.42       10.27        2.39 o
   2   4   2       18.92       15.95        2.31 o
   3   4   2        2.14        0.12        1.41 o
   4   4   2        2.67        5.25        2.24 o
   5   4   2        2.85        6.88        1.94 o
   6   4   2        6.69        5.32        4.03 o
   7   4   2       48.68       39.52        3.14 o
   8   4   2        5.83        6.75        3.38 o
   9   4   2        3.52        1.95        2.93 o
  10   4   2       11.36        7.64        5.68 o
  11   4   2       27.55       23.28        2.98 o
  12   4   2        0.99        0.30        0.67 o
  13   4   2        7.91        4.32        4.34 o
  14   4   2        2.13        0.96        2.43 o
  15   4   2       -6.10        0.00        3.46 o
  16   4   2       -0.20        0.41        0.68 o
  17   4   2        0.89        4.64        0.57 o
  18   4   2       40.37       41.32        3.45 o
  19   4   2        2.53        4.35        2.46 o
   1   5   2       -1.65        0.04        1.15 o
   2   5   2       96.10       78.53        4.61 o
   3   5   2        8.88        6.42        5.02 o
   4   5   2        8.76       10.26        5.01 o
   5   5   2        0.82        0.78        0.67 o
   6   5   2        7.71        9.99        6.27 o
   7   5   2       29.38       26.51        3.20 o
   8   5   2        6.17        7.81        4.81 o
   9   5   2      274.85      250.84       10.04 o
  10   5   2        1.59        1.49        2.04 o
  11   5   2       89.48       75.11        5.13 o
  12   5   2        2.11        3.33        1.82 o
  13   5   2       -2.33        0.18        1.97 o
  14   5   2       -2.28        0.04        1.98 o
  15   5   2        2.18        3.62        2.24 o
  16   5   2       21.79       17.70        3.81 o
   0   6   2        0.43        0.86        1.19 o
   1   6   2        1.80        2.73        1.73 o
   2   6   2       -5.11        0.27        3.75 o
   3   6   2        5.52        1.76        4.76 o
   4   6   2       -0.99        0.82        1.02 o
   5   6   2        3.84        2.05        4.10 o
   6   6   2        2.69        0.42        2.64 o
   7   6   2       -2.31        0.00        3.14 o
   8   6   2        6.78        3.47        4.84 o
   9   6   2        1.95        0.18        1.81 o
  10   6   2        1.80        1.60        2.55 o
   1   1   3       -1.15        0.20        0.37 o
   2   1   3      604.29      567.63       11.75 o
   3   1   3       45.27       29.47        2.22 o
   4   1   3       17.45       18.51        1.25 o
   5   1   3      252.19      266.43        5.38 o
   6   1   3      280.98      295.65        5.93 o
   7   1   3       19.01       26.64        1.47 o
   8   1   3      164.50      207.71        4.08 o
   9   1   3      476.11      494.06       10.60 o
  10   1   3       80.77       81.27        2.70 o
  11   1   3       40.82       40.01        2.14 o
  12   1   3      212.50      242.51        5.48 o
  13   1   3      121.00      127.21        3.77 o
  14   1   3       15.14       16.03        1.72 o
  15   1   3       34.18       43.88        2.17 o
  16   1   3       77.68       96.23        3.20 o
  17   1   3        2.29        4.18        1.26 o
  18   1   3       35.01       43.94        2.36 o
  19   1   3        4.74        6.89        2.27 o
  20   1   3       49.96       61.19        2.85 o
  21   1   3        0.46        0.23        0.49 o
  22   1   3        1.04        1.19        1.10 o
   0   2   3      233.44      249.47        7.66 o
   1   2   3       67.83       79.65        2.06 o
   2   2   3       -1.30        0.17        0.44 o
   3   2   3       81.37       99.25        2.31 o
   4   2   3      128.84      130.40        3.24 o
   5   2   3       16.11       15.67        1.28 o
   6   2   3       16.25       17.56        1.55 o
   7   2   3      102.88      112.93        3.32 o
   8   2   3        1.54        2.03        0.72 o
   9   2   3       11.33       12.37        3.70 o
  10   2   3        0.73        0.01        0.34 o
  11   2   3       60.75       63.74        2.68 o
  12   2   3        0.46        0.32        0.27 o
  13   2   3        5.96        5.94        3.19 o
  14   2   3       23.65       20.84        1.95 o
  15   2   3        7.89        7.24        3.32 o
  16   2   3       13.07       10.01        2.19 o
  17   2   3       14.60       17.34        2.19 o
  18   2   3       24.63       23.15        2.39 o
  19   2   3        7.33        6.62        4.13 o
  20   2   3       10.18       10.34        4.93 o
  21   2   3       11.83       13.17        5.69 o
   1   3   3        2.74        3.84        1.05 o
   2   3   3       63.50       51.94        2.62 o
   3   3   3       13.93       13.86        1.77 o
   4   3   3        3.42        2.34        1.73 o
   5   3   3       29.93       28.59        2.39 o
   6   3   3       52.90       56.82        3.00 o
   7   3   3       -1.63        0.32        0.87 o
   8   3   3       25.83       32.19        2.08 o
   9   3   3      112.16       94.05        4.09 o
  10   3   3        8.14       12.29        4.06 o
  11   3   3       12.78        8.56        2.48 o
  12   3   3       48.71       51.69        2.82 o
  13   3   3       18.04       18.13        1.98 o
  14   3   3        4.31        3.98        2.48 o
  15   3   3       12.79       11.16        2.80 o
  16   3   3       13.87       19.66        3.32 o
  17   3   3        5.36        4.14        3.69 o
  18   3   3        7.25        7.46        5.18 o
  19   3   3        4.32        2.53        2.60 o
  20   3   3        7.53       14.29        4.40 o
   0   4   3      152.82      152.48        8.14 o
   1   4   3       52.52       55.60        3.33 o
   2   4   3        0.46        2.44        0.57 o
   3   4   3       59.30       54.27        3.55 o
   4   4   3       75.19       68.44        4.16 o
   5   4   3       14.55       14.28        2.79 o
   6   4   3       13.76       15.00        2.84 o
   7   4   3       56.92       53.13        3.75 o
   8   4   3        3.74        0.80        1.88 o
   9   4   3        6.12        4.37        4.53 o
  10   4   3        0.72        0.23        0.53 o
  11   4   3       40.68       39.59        3.37 o
  12   4   3       -0.58        0.21        0.65 o
  13   4   3        4.07        7.02        3.30 o
  14   4   3       22.17       20.15        3.57 o
  15   4   3       10.33        8.75        5.23 o
  16   4   3        5.98        6.01        4.02 o
  17   4   3       10.76       18.30        7.16 o
   1   5   3        4.31        4.80        3.83 o
   2   5   3        0.97        2.23        0.71 o
   3   5   3        5.03        7.11        4.62 o
   4   5   3        2.03        0.11        1.78 o
   5   5   3        0.82        0.39        0.54 o
   6   5   3        4.93        3.27        4.32 o
   7   5   3       -2.13        0.70        2.49 o
   8   5   3        5.88        0.06        4.22 o
   9   5   3        3.84        4.13        3.31 o
  10   5   3        0.27        0.05        0.71 o
  11   5   3       -2.41        0.18        2.81 o
  12   5   3       -0.74        2.76        0.64 o
  13   5   3       -3.10        0.12        1.89 o
   0   6   3       65.13       49.16        6.35 o
   1   6   3       12.30       15.50        6.21 o
   2   6   3        1.96        2.03        2.35 o
   3   6   3       17.88       16.40        3.58 o
   4   6   3       30.45       22.61        3.80 o
   5   6   3       11.93       10.65        9.24 o
   6   6   3       15.81       12.92        3.64 o
   0   0   4      673.17      578.74       32.57 o
   1   0   4       56.93       38.52        3.52 o
   2   0   4       94.84       85.68        4.41 o
   3   0   4      129.33       90.10        5.29 o
   4   0   4       76.96       73.60        3.82 o
   5   0   4        0.62        1.91        0.40 o
   6   0   4      121.69      137.87        5.22 o
   7   0   4      280.99      329.49        9.67 o
   8   0   4        2.60        0.85        2.22 o
   9   0   4       22.74       23.58        2.50 o
  10   0   4        8.73        6.26        5.14 o
  11   0   4      281.64      300.98        9.92 o
  12   0   4       16.84       13.57        3.06 o
  13   0   4       31.64       36.37        2.98 o
  14   0   4       56.80       55.64        3.90 o
  15   0   4        8.93       15.87        5.48 o
  16   0   4        8.80        9.24        6.44 o
  17   0   4       21.79       26.03        3.48 o
  18   0   4       62.28       86.47        4.31 o
  19   0   4        7.02        5.53        3.62 o
  20   0   4       17.73       22.38        2.94 o
   1   1   4        1.19        0.30        0.58 o
   2   1   4       55.44       62.13        2.15 o
   3   1   4        8.88        6.22        2.69 o
   4   1   4        1.12        0.83        0.71 o
   5   1   4       10.09        7.39        3.42 o
   6   1   4       14.46       13.99        2.06 o
   7   1   4        6.09        5.34        2.60 o
   8   1   4        1.57        3.43        1.00 o
   9   1   4       25.86       30.38        2.10 o
  10   1   4        2.78        0.12        1.54 o
  11   1   4        5.48        7.66        2.64 o
  12   1   4        3.05        3.80        1.46 o
  13   1   4        2.85        2.15        1.70 o
  14   1   4       -0.73        2.29        0.35 o
  15   1   4        5.60        6.05        2.99 o
  16   1   4        6.64        6.54        3.49 o
  17   1   4        0.31        0.21        0.39 o
  18   1   4        3.99        2.62        2.01 o
  19   1   4        2.54        0.03        1.60 o
  20   1   4        9.30        5.49        3.97 o
   0   2   4      188.51      162.97        6.83 o
   1   2   4       23.11       17.93        1.50 o
   2   2   4       27.17       28.09        1.76 o
   3   2   4       16.82       17.67        1.67 o
   4   2   4       36.76       37.47        2.28 o
   5   2   4        0.87        0.19        0.41 o
   6   2   4       55.15       59.11        3.06 o
   7   2   4      127.52      123.77        4.42 o
   8   2   4       -0.29        0.34        0.43 o
   9   2   4        7.44        7.72        3.94 o
  10   2   4        0.43        2.00        0.38 o
  11   2   4      124.67      117.95        4.61 o
  12   2   4        9.98        8.75        4.25 o
  13   2   4       16.77       15.71        2.57 o
  14   2   4       29.84       31.69        2.47 o
  15   2   4        3.90        4.14        2.50 o
  16   2   4        5.52        5.35        3.36 o
  17   2   4       10.94       13.27        5.59 o
  18   2   4       26.97       39.32        2.55 o
  19   2   4        7.37        4.88        4.76 o
   1   3   4       -1.80        0.03        1.15 o
   2   3   4      120.04      109.71        4.52 o
   3   3   4       16.12       17.97        2.51 o
   4   3   4        2.58        3.80        1.82 o
   5   3   4       26.72       29.49        2.56 o
   6   3   4       26.90       22.44        2.60 o
   7   3   4       17.59       18.25        2.72 o
   8   3   4        9.65        6.50        4.17 o
   9   3   4       47.96       51.10        3.20 o
  10   3   4        0.00        0.19        0.50 o
  11   3   4       13.80       16.25        3.45 o
  12   3   4        9.46        6.85        6.30 o
  13   3   4       12.40        9.79        6.39 o
  14   3   4        0.21        3.22        0.65 o
  15   3   4       18.05       20.93        3.64 o
  16   3   4       27.08       21.06        3.37 o
  17   3   4        2.29        0.83        1.98 o
   0   4   4       18.53       18.57        4.88 o
   1   4   4       10.39       10.41        7.89 o
   2   4   4        2.95        2.35        3.10 o
   3   4   4       -0.28        0.26        0.88 o
   4   4   4        1.86        3.02        1.99 o
   5   4   4        3.80        2.09        3.49 o
   6   4   4       12.29        6.42        5.62 o
   7   4   4       24.30       15.66        2.72 o
   8   4   4        1.15        0.00        1.39 o
   9   4   4        0.18        0.24        0.65 o
  10   4   4        4.04        0.48        3.07 o
  11   4   4       24.09       14.71        2.81 o
  12   4   4        1.05        1.44        1.25 o
  13   4   4        5.08        2.94        4.13 o
  14   4   4        4.34        3.66        3.93 o
   1   5   4       -3.19        0.12        4.14 o
   2   5   4       74.17       60.37        5.69 o
   3   5   4        8.70        9.67        6.93 o
   4   5   4       12.27        6.02        8.88 o
   5   5   4       14.43       14.50        3.14 o
   6   5   4       10.04        9.71        6.61 o
   7   5   4       14.70       12.05        3.92 o
   8   5   4        8.93        6.87        6.73 o
   9   5   4       24.69       27.14        3.61 o
   1   1   5       -0.68        0.04        0.43 o
   2   1   5        0.08        0.09        0.36 o
   3   1   5        9.42        6.43        4.51 o
   4   1   5        5.31        0.09        3.15 o
   5   1   5       90.08       89.28        3.81 o
   6   1   5       98.56       86.56        3.82 o
   7   1   5       10.09        8.34        4.32 o
   8   1   5       77.78       77.96        3.26 o
   9   1   5      140.87      130.66        4.43 o
  10   1   5       34.22       33.56        2.33 o
  11   1   5        4.20        4.72        2.30 o
  12   1   5       82.69       72.93        3.41 o
  13   1   5       56.62       63.74        2.85 o
  14   1   5        4.90        8.28        2.69 o
  15   1   5       14.02       19.55        2.61 o
  16   1   5       -1.60        0.19        0.84 o
   0   2   5       53.89       48.46        4.67 o
   1   2   5       16.31       16.79        3.47 o
   2   2   5       -1.56        0.05        1.40 o
   3   2   5       36.57       32.71        2.69 o
   4   2   5       38.25       37.45        3.00 o
   5   2   5        5.60        3.89        3.88 o
   6   2   5        3.80        4.16        2.83 o
   7   2   5        1.51        0.01        1.59 o
   8   2   5        4.17        0.76        3.53 o
   9   2   5       -3.14        0.01        1.95 o
  10   2   5        1.92        0.10        1.83 o
  11   2   5        0.35        0.02        0.53 o
  12   2   5        1.05        0.25        1.16 o
  13   2   5        1.71        0.35        1.52 o
  14   2   5        6.79        7.28        4.34 o
  15   2   5        5.88        6.71        3.01 o
   1   3   5        0.34        0.96        0.62 o
   2   3   5        3.94        0.08        2.98 o
   3   3   5        4.36        4.16        3.06 o
   4   3   5        1.69        0.43        1.75 o
   5   3   5       19.11       15.76        2.78 o
   6   3   5       18.44       17.40        2.86 o
   7   3   5        0.54        0.46        0.60 o
   8   3   5       18.47       22.34        4.06 o
   9   3   5       36.55       31.60        3.41 o
  10   3   5       13.14       13.29        3.89 o
  11   3   5       -0.81        1.12        0.56 o
  12   3   5       21.67       18.74        3.05 o
  13   3   5        9.67       12.86       15.86 o
   0   4   5       59.57       45.01        7.24 o
   1   4   5       20.89       22.72        5.08 o
   2   4   5        1.61        0.10        2.91 o
   3   4   5       23.18       31.20        4.64 o
   4   4   5       27.62       29.92        3.64 o
   5   4   5        4.40        3.18        3.81 o
   6   4   5        6.38        4.82        3.95 o
   7   4   5       -0.76        0.20        0.75 o
   8   4   5        0.82        0.43        0.86 o
   0   0   6       -6.26        0.19        5.56 o
   1   0   6        5.33        4.78        3.29 o
   2   0   6        6.51        7.97        5.41 o
   3   0   6       12.85       14.74        4.38 o
   4   0   6      102.52       95.41        8.01 o
   5   0   6        4.93        2.60        3.80 o
   6   0   6       65.16       54.78        4.65 o
   7   0   6       42.97       38.01        3.89 o
   8   0   6        1.24        0.19        1.76 o
   9   0   6        1.54        0.95        2.00 o
  10   0   6       -0.02        0.02        0.44 o
  11   0   6       38.37       46.22        4.04 o
   1   1   6        1.98        0.19        1.46 o
   2   1   6        1.91        5.73        1.54 o
   3   1   6       -2.70        0.88        2.30 o
   4   1   6       -3.20        0.01        2.04 o
   5   1   6        6.99        6.68        3.87 o
   6   1   6        2.59        2.04        2.25 o
   7   1   6        1.35        2.00        1.56 o
   8   1   6       -1.70        0.31        1.49 o
   9   1   6       -1.78        0.00        1.42 o
  10   1   6       -1.67        0.02        1.31 o
   0   2   6        0.43        0.41        0.38 o
   1   2   6        6.45        2.41        6.61 o
   2   2   6        2.56        3.22        2.45 o
   3   2   6        5.39        4.57        4.77 o
   4   2   6       55.62       48.10        5.19 o
   5   2   6        2.73        0.68        4.20 o
   6   2   6       40.99       31.81        4.00 o
   7   2   6       23.29       16.30        3.01 o
   8   2   6        3.06        0.02        3.11 o
